# Supplementary material for: Identification of a Tumor Cell Associated Type I IFN Resistance Gene Expression Signature of Human Melanoma, the Components of Which Have a Predictive Potential for Immunotherapy
Source: MDPI journal article supplement (doi:10.3390/ijms23052704), 2022-02-28
Supplement: s1 [file s1]

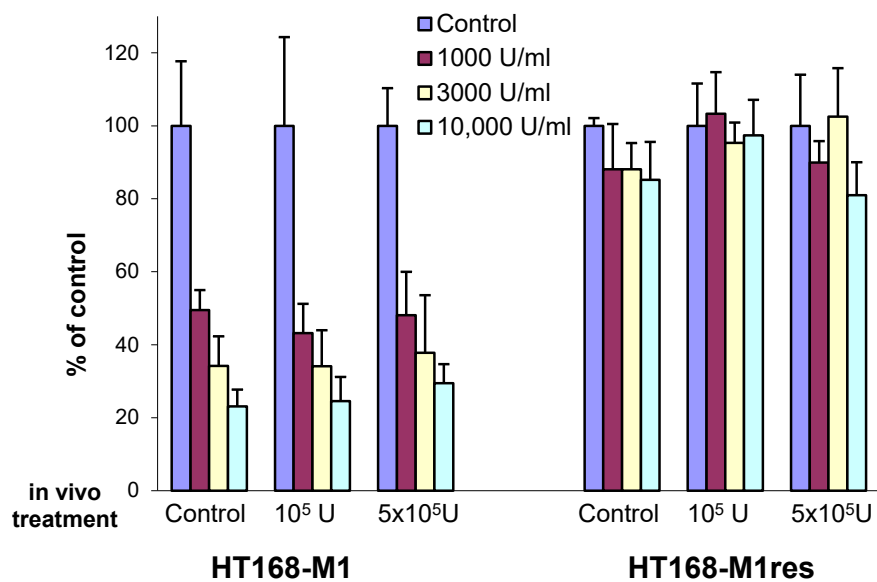

**Figure S1.** Effect of 5-day-long IFN- $\alpha$ 2a treatment on the proliferation of HT168-M1 and HT168-M1res cells isolated from primary tumors of IFN- $\alpha$ 2a-treated or control SCID mice (MTT assay, 5 parallel samples, mean  $\pm$  SD)
