# Supplementary material for: Identification of a Tumor Cell Associated Type I IFN Resistance Gene Expression Signature of Human Melanoma, the Components of Which Have a Predictive Potential for Immunotherapy
Source: Int J Mol Sci. 2022 Feb 28;23(5):2704. doi: 10.3390/ijms23052704 (PMC8911010; doi:10.3390/ijms23052704)
Supplement: Supplementary file 1 [file ijms-23-02704-s001.zip]

Archive with 9 entries (9 files):
- Table S4.xlsx
- Table S5.xlsx
- Table S6.xlsx
- Table S7.txt
- Figure S1.pdf
- HB0055A 10 27 06 1 44 PM.xls
- Table S1.xlsx
- Table S2.xlsx
- Table S3.xlsx
