# Supplementary material for: Identification of a Tumor Cell Associated Type I IFN Resistance Gene Expression Signature of Human Melanoma, the Components of Which Have a Predictive Potential for Immunotherapy
Source: Int J Mol Sci. 2022 Feb 28;23(5):2704. doi: 10.3390/ijms23052704 (PMC8911010; doi:10.3390/ijms23052704)
Supplement: Supplementary file 1 [file ijms-23-02704-s001.zip › HB0055A 10 27 06 1 44 PM.xls]

## Sheet: HB0055A 10 27 06 1 44 PM
GENE_ID	PROBE_ID	PROBE_TYPE	ROW	COLUMN	HB0055A_10/27/06_1:44_PM_SAMPLE_NAME	HB0055A_10/27/06_1:44_PM_SIGNAL	HB0055A_10/27/06_1:44_PM_S/N	HB0055A_10/27/06_1:44_PM_ASSAY_NORMALIZED_SIGNAL	HB0055A_10/27/06_1:44_PM_SDEV	HB0055A_10/27/06_1:44_PM_CV	HB0055A_10/27/06_1:44_PM_FLAGS
371915	226590	probe	121	23	1/ IVT	105.85	2.44	0.09	43.32	0.41	0
375382	219301	probe	7	34	1/ IVT	1045.79	1.03	0.85	1012.25	0.97	0
395233	226368	probe	191	34	1/ IVT	10102.9	32.55	8.92	310.36	0.05	64
445830	225407	probe	13	95	1/ IVT	6893.42	32.66	5.62	211.04	0.05	0
457707	217527	probe	149	74	1/ IVT	245.89	-1.28	0.22	245.89	0.78	1
473566	217432	probe	215	96	1/ IVT	1602.4	4.21	1.41	380.31	0.24	0
892161	224349	probe	111	58	1/ IVT	2003.3	8.31	1.63	241.08	0.13	0
371247_rc	282357	probe	65	25	1/ IVT	296.96	2.21	0.24	134.13	0.45	0
371247_rc	224689	probe	121	111	1/ IVT	185.98	2.2	0.16	84.69	0.46	0
371630_rc	226296	probe	185	13	1/ IVT	6920.55	28.33	6.11	244.28	0.05	0
371758_rc	220448	probe	62	134	1/ IVT	1220.1	15.32	1	79.65	0.07	0
371922_rc	225638	probe	25	74	1/ IVT	385.12	-0.03	0.31	385.12	38.02	1
371934_rc	219335	probe	131	55	1/ IVT	612.67	5.38	0.54	113.96	0.19	0
372488_rc	227184	probe	213	21	1/ IVT	925.56	3.02	0.82	306.31	0.33	0
374484_rc	218879	probe	105	84	1/ IVT	163.85	-1.64	0.13	163.85	0.61	1
377797_rc	222093	probe	98	41	1/ IVT	461.77	-1.98	0.38	461.77	0.51	1
383363_rc	224427	probe	201	85	1/ IVT	602.31	5.29	0.53	113.82	0.19	0
383950_rc	225730	probe	25	10	1/ IVT	748.73	9.26	0.61	80.82	0.11	0
385515_rc	224264	probe	54	30	1/ IVT	1137.25	12.03	0.93	94.53	0.09	0
387059_rc	223291	probe	69	47	1/ IVT	341.15	0.49	0.28	341.15	2.04	1
387108_rc	220149	probe	53	156	1/ IVT	753.38	4.25	0.61	177.28	0.24	0
388032_rc	226526	probe	158	57	1/ IVT	786.86	5.45	0.69	144.49	0.19	0
390787_rc	227155	probe	158	83	1/ IVT	112.52	-1.78	0.1	112.52	0.56	1
391223_rc	194776	probe	170	86	1/ IVT	831.54	4.57	0.73	182	0.22	0
392786_rc	195641	probe	128	108	1/ IVT	165.07	-1.26	0.15	165.07	0.8	1
404893_rc	225460	probe	127	50	1/ IVT	209.37	-0.17	0.18	209.37	5.77	1
409062_rc	222433	probe	147	92	1/ IVT	2431.34	9.54	2.15	254.83	0.11	0
425346_rc	222009	probe	162	136	1/ IVT	145.76	-1.5	0.13	145.76	0.67	1
451047_rc	225481	probe	141	24	1/ IVT	2115.73	8.63	1.87	245.1	0.12	0
466806_rc	222261	probe	168	133	1/ IVT	45.94	-0.56	0.04	45.94	1.78	1
467567_rc	218668	probe	25	149	1/ IVT	389.91	2.64	0.32	147.72	0.38	0
473897_rc	226693	probe	188	62	1/ IVT	21580.5	71.75	19.05	300.75	0.04	0
475080_rc	219851	probe	89	131	1/ IVT	968.46	5.46	0.79	177.42	0.19	0
477453_rc	121124	probe	190	11	1/ IVT	273.84	0.61	0.24	273.84	1.65	1
478147_rc	220577	probe	155	16	1/ IVT	346.94	1.51	0.31	229.5	0.66	0
886870_rc	222033	probe	44	116	1/ IVT	933.92	-0.8	0.76	933.92	1.25	1
890004_rc	218053	probe	169	46	1/ IVT	1056.05	1.47	0.93	720.39	0.68	0
AB007923.2	112566	probe	174	8	1/ IVT	1757.91	1.76	1.55	997.48	0.57	0
AB011137.2	102999	probe	233	136	1/ IVT	155.3	-0.77	0.14	155.3	1.31	1
AB039791.1	117084	probe	144	13	1/ IVT	406.67	2.78	0.36	146.06	0.36	0
AB065461.1_CDS_1	120715	probe	109	143	1/ IVT	1403.44	7.8	1.14	179.85	0.13	0
AF050199.1	106630	probe	107	87	1/ IVT	955.1	-1.23	0.78	955.1	0.81	1
AF067801.1	147245	probe	45	143	1/ IVT	784.34	1.29	0.64	609.47	0.78	0
AF075027.1	170698	probe	214	35	1/ IVT	135.76	1.06	0.12	127.83	0.94	0
AF088032.1	164432	probe	179	157	1/ IVT	182995	96.42	161.55	1897.84	0.04	0
AF113685.1	171597	probe	138	63	1/ IVT	672.48	4.66	0.59	144.33	0.22	0
AF116678.1	158384	probe	182	138	1/ IVT	324.57	3.93	0.29	82.62	0.26	0
AF119867.1	219202	probe	229	86	1/ IVT	174.68	2.06	0.15	84.61	0.49	0
AF147791.1	152249	probe	66	159	1/ IVT	507.96	4	0.41	127.04	0.25	0
AF172328.1	230894	probe	25	42	1/ IVT	1536.01	6.38	1.25	240.87	0.16	0
AF208161.1	133672	probe	106	133	1/ IVT	5726.21	35.68	4.67	160.48	0.05	0
AF359415.1	541732	probe	95	9	1/ IVT	309.88	-0.6	0.25	309.88	1.65	1
AF386395.1_CDS_1	186191	probe	37	59	1/ IVT	485.37	2.15	0.4	225.43	0.47	0
AF452719.1	122983	probe	114	89	1/ IVT	2555.23	2.43	2.08	1050.71	0.41	0
AF504647.1	229439	probe	141	8	1/ IVT	126.26	-0.86	0.11	126.26	1.16	1
AJ406951.1	112285	probe	155	34	1/ IVT	370.08	-0.44	0.33	370.08	2.28	1
AJ426174.1_CDS_1	123046	probe	2	58	1/ IVT	386.86	3.02	0.32	127.98	0.33	0
AK000053.1	591390	probe	213	108	1/ IVT	1191.86	5.1	1.05	233.76	0.2	0
AK021848.1	110704	probe	69	130	1/ IVT	7874.31	44.41	6.42	177.29	0.04	0
AK021851.1	158011	probe	123	30	1/ IVT	118	-0.37	0.1	118	2.7	1
AK022407.1	146305	probe	77	55	1/ IVT	1119.94	6.66	0.91	168.24	0.15	0
AK022411.1	693700	probe	88	69	1/ IVT	147.2	0.21	0.12	147.2	4.7	1
AK022550.1	167382	probe	66	102	1/ IVT	1575.54	6.57	1.29	239.77	0.16	0
AK022914.1	108534	probe	153	29	1/ IVT	154.13	0.76	0.14	154.13	1.32	1
AK023343.1	232650	probe	215	58	1/ IVT	76.24	0.79	0.07	76.24	1.27	1
AK023628.1	123404	probe	17	56	1/ IVT	364.77	2.78	0.3	131.12	0.36	0
AK023769.1	231505	probe	228	101	1/ IVT	455.39	2.8	0.4	162.64	0.36	0
AK024448.1	152248	probe	166	108	1/ IVT	906.68	0.27	0.8	906.68	3.72	1
AK026947.1	229049	probe	204	159	1/ IVT	851.44	7.39	0.75	115.2	0.14	0
AK026965.1	208561	probe	236	144	1/ IVT	285.24	0.45	0.25	285.24	2.24	1
AK027667.1	127648	probe	234	67	1/ IVT	14256.6	48.91	12.59	291.5	0.04	0
AK055306.1	223892	probe	174	48	1/ IVT	156.86	1.18	0.14	133.43	0.85	0
AK055503.1	230114	probe	203	119	1/ IVT	2639.24	13.49	2.33	195.69	0.08	0
AK055619.1	229178	probe	82	33	1/ IVT	37406.4	65.55	30.51	570.66	0.04	0
AK057355.1	233508	probe	221	9	1/ IVT	318.88	4.2	0.28	75.93	0.24	0
AK075065.1	151787	probe	163	38	1/ IVT	870.36	13.63	0.77	63.83	0.08	0
AK090403.1	140844	probe	86	5	1/ IVT	4658.2	12.88	3.8	361.52	0.09	0
AK090827.1	112366	probe	48	17	1/ IVT	7542.99	41.32	6.15	182.55	0.04	0
AK091254.1	161079	probe	205	125	1/ IVT	1783.87	25.34	1.57	70.39	0.05	0
AK093281.1	157730	probe	182	5	1/ IVT	256.42	-0.28	0.23	256.42	3.52	1
AK094156.1	200572	probe	38	113	1/ IVT	19020.7	48.24	15.51	394.28	0.04	0
AK095183.1	181194	probe	133	59	1/ IVT	2020.21	11.08	1.78	182.4	0.1	0
AK096715.1	178423	probe	15	70	1/ IVT	19474.3	53.24	15.88	365.8	0.04	0
AK097768.1	231835	probe	206	159	1/ IVT	2988.86	18.46	2.64	161.88	0.07	0
AK097814.1	229808	probe	219	132	1/ IVT	3514.59	16.31	3.1	215.49	0.07	64
AK098143.1	229721	probe	123	109	1/ IVT	181.92	1.23	0.16	147.4	0.81	0
AK123974.1	175244	probe	21	73	1/ IVT	1993.84	12.44	1.63	160.26	0.09	0
AK125429.1	141197	probe	131	72	1/ IVT	13684.5	26.14	12.08	523.49	0.05	0
AK126659.1	232265	probe	78	155	1/ IVT	720.55	-1.21	0.59	720.55	0.83	1
AK127225.1	230441	probe	73	31	1/ IVT	1071.5	5.24	0.87	204.5	0.19	64
AK128346.1	149747	probe	182	83	1/ IVT	110.87	1.1	0.1	100.53	0.91	0
AK128780.1	216448	probe	44	36	1/ IVT	13213.9	37.01	10.78	357.06	0.04	0
AK128780.1	188191	probe	63	69	1/ IVT	15540	12.14	12.68	1279.65	0.09	0
AK130864.1	212871	probe	212	146	1/ IVT	2512.6	5.51	2.22	456.33	0.19	0
AK131040.1	150185	probe	118	122	1/ IVT	3359.23	17.04	2.74	197.12	0.07	0
AL049239.1	165038	probe	11	73	1/ IVT	10448.2	3.72	8.52	2810.82	0.27	0
AL049737.4_CDS_1	237004	probe	218	110	1/ IVT	18000.5	56.65	15.89	317.77	0.04	0
AL117445.1	174074	probe	221	73	1/ IVT	126.51	-1.76	0.11	126.51	0.57	1
AL137259.1	171600	probe	4	54	1/ IVT	184.1	0.3	0.15	184.1	3.38	1
AL137259.1	149923	probe	187	34	1/ IVT	23378.6	58.47	20.64	399.85	0.04	0
AL359572.1	231578	probe	112	105	1/ IVT	452.96	-1.39	0.37	452.96	0.72	1
AL832553.1	230804	probe	178	126	1/ IVT	1378.48	5.15	1.22	267.66	0.2	0
AL833358.1	173391	probe	10	139	1/ IVT	12944.8	45.41	10.56	285.04	0.04	0
AL834281.1	710345	probe	232	43	1/ IVT	869.72	4.21	0.77	206.4	0.24	0
AX657516.1_CDS_1	148980	probe	150	133	1/ IVT	217.26	2.94	0.19	73.92	0.34	0
AX659335.1_CDS_1	199376	probe	73	9	1/ IVT	471.89	-0.81	0.38	471.89	1.23	1
AX747211.1	168964	probe	98	18	1/ IVT	31073.7	3.65	25.35	8519.44	0.28	0
AX805779.1	228597	probe	182	93	1/ IVT	195.93	0.75	0.17	195.93	1.34	1
AX876161.1_CDS_1	114704	probe	74	42	1/ IVT	307.67	0.17	0.25	307.67	5.9	1
AY026949.1	540864	probe	122	126	1/ IVT	1879.99	2.33	1.66	807.8	0.43	0
AY159812.1	237442	probe	57	48	1/ IVT	244.72	-0.14	0.2	244.72	7.28	1
AY320844.1_CDS_1	155556	probe	123	113	1/ IVT	381.3	3.6	0.34	106.05	0.28	0
AY320858.1_CDS_1	199935	probe	16	18	1/ IVT	200.98	0.87	0.16	200.98	1.15	1
AY341949.1	143263	probe	138	78	1/ IVT	2841.92	15.36	2.51	185	0.08	0
AY423226.1	185626	probe	29	5	1/ IVT	716.71	4.58	0.58	156.63	0.22	0
BC002659.1	150332	probe	199	53	1/ IVT	3451.63	10.75	3.05	321.16	0.1	0
BC002816.2	163227	probe	104	114	1/ IVT	990.35	5.18	0.81	191.22	0.2	0
BC006164.1	214368	probe	189	124	1/ IVT	340.02	0.33	0.3	340.02	3.04	1
BC009633.1	191363	probe	164	109	1/ IVT	3248.13	14.15	2.87	229.61	0.08	0
BC009864.2	217808	probe	172	69	1/ IVT	231.14	1.55	0.2	149.48	0.65	64
BC010081.2	217769	probe	33	154	1/ IVT	1423.76	9.8	1.16	145.23	0.11	0
BC010081.2	234537	probe	113	125	1/ IVT	818.14	11.15	0.67	73.4	0.1	0
BC010426.1	233476	probe	176	121	1/ IVT	340.97	-0.12	0.3	340.97	8.1	1
BC013171.1	205074	probe	70	39	1/ IVT	100072	93.75	81.62	1067.45	0.04	0
BC014198.2	702618	probe	13	28	1/ IVT	626.97	0.38	0.51	626.97	2.64	1
BC015870.1	237080	probe	112	64	1/ IVT	12192.4	61.41	9.94	198.56	0.04	0
BC019703.1	235277	probe	68	144	1/ IVT	189.04	1.65	0.15	114.36	0.61	0
BC019703.1	218771	probe	231	8	1/ IVT	1177.47	0.68	1.04	1177.47	1.46	1
BC019830.1	221589	probe	197	1	1/ IVT	503.87	1.33	0.44	377.81	0.75	0
BC022832.1	149228	probe	23	69	1/ IVT	3730.34	28.5	3.04	130.89	0.05	0
BC023516.2	138399	probe	114	98	1/ IVT	11139.3	54.03	9.09	206.17	0.04	0
BC027954.1	169714	probe	169	123	1/ IVT	203.85	-0.56	0.18	203.85	1.79	1
BC030984.1	209080	probe	213	6	1/ IVT	10151.4	30.88	8.96	328.73	0.05	0
BC036040.1	233577	probe	98	144	1/ IVT	206.89	-1.17	0.17	206.89	0.85	1
BC036263.1	129786	probe	56	131	1/ IVT	2555.3	13.5	2.08	189.22	0.08	0
BC039180.1	179699	probe	46	9	1/ IVT	449.31	0.86	0.37	449.31	1.16	1
BC039457.1	163740	probe	96	32	1/ IVT	32518.9	40.17	26.52	809.53	0.04	0
BC040855.1	189048	probe	46	64	1/ IVT	3189.74	8.97	2.6	355.42	0.12	0
BC041879.1	156670	probe	112	98	1/ IVT	2095.44	12.5	1.71	167.65	0.09	0
BC043192.1	102944	probe	168	78	1/ IVT	1359.81	9.65	1.2	140.85	0.11	0
BC043273.2	167179	probe	43	113	1/ IVT	221.35	-0.88	0.18	221.35	1.13	1
BC045725.1	458096	probe	233	76	1/ IVT	1442.73	10.08	1.27	143.11	0.11	0
BC046344.1	235757	probe	110	47	1/ IVT	7882.5	27.75	6.43	284.09	0.05	0
BC047332.1	171151	probe	210	15	1/ IVT	7377.51	39.92	6.51	184.79	0.05	0
BC047459.1	118843	probe	3	69	1/ IVT	750.47	8.54	0.61	87.83	0.12	0
BC051727.1	312761	probe	47	145	1/ IVT	255.82	0.56	0.21	255.82	1.79	1
BC053887.1	185605	probe	42	9	1/ IVT	413.69	0.5	0.34	413.69	1.99	1
BC061590.1	214852	probe	103	87	1/ IVT	22591.4	56.17	18.43	402.22	0.04	0
BC062579.1	173890	probe	162	156	1/ IVT	7317.58	28.56	6.46	256.25	0.05	0
BC063035.1	177707	probe	112	83	1/ IVT	2895.21	10.34	2.36	280.14	0.1	0
BC065757.1	101695	probe	206	26	1/ IVT	34.73	-1.49	0.03	34.73	0.67	1
BC071855.1	145023	probe	88	42	1/ IVT	5361.12	22.51	4.37	238.14	0.06	64
BX538005.1	163580	probe	47	16	1/ IVT	5690.78	37.01	4.64	153.75	0.04	0
BX641014.1	132210	probe	25	93	1/ IVT	784.37	8.01	0.64	97.88	0.13	0
BX647680.1	164511	probe	10	23	1/ IVT	1831.84	8.49	1.49	215.78	0.12	0
BX647826.1	200991	probe	52	90	1/ IVT	641.49	1.14	0.52	561.5	0.88	0
BX647826.1	101527	probe	197	158	1/ IVT	2233.52	19.48	1.97	114.65	0.06	0
ENST00000288168	137436	probe	38	12	1/ IVT	12776.5	46.75	10.42	273.32	0.04	0
ENST00000293094	232046	probe	5	36	1/ IVT	252.16	-1.43	0.21	252.16	0.7	1
ENST00000304870	189707	probe	24	138	1/ IVT	572384	66.92	466.87	8553.48	0.04	0
ENST00000320505	106007	probe	90	96	1/ IVT	205601	33.51	167.7	6135.2	0.05	0
ENST00000320863	236151	probe	130	52	1/ IVT	3779.6	29.19	3.34	129.48	0.05	0
ENST00000326308	100914	probe	106	129	1/ IVT	39811.4	36.5	32.47	1090.86	0.04	0
ENST00000326875	128737	probe	197	112	1/ IVT	1.43192e+06	106.98	1264.1	13384.9	0.04	0
ENST00000332544	129147	probe	198	79	1/ IVT	4224.68	40.57	3.73	104.14	0.05	0
ENST00000338600	157015	probe	184	76	1/ IVT	2166.08	15.39	1.91	140.7	0.08	0
ENST00000340259	200688	probe	14	107	1/ IVT	764.17	5.32	0.62	143.53	0.19	0
ENST00000340267	129708	probe	47	139	1/ IVT	695294	86.6	567.12	8028.74	0.04	0
ENST00000340878	185320	probe	163	134	1/ IVT	378.24	5.12	0.33	73.93	0.2	64
ENST00000342859	161087	probe	235	115	1/ IVT	306107	97.87	270.23	3127.85	0.04	0
ENST00000344368	185819	probe	34	136	1/ IVT	7859.44	28.42	6.41	276.57	0.05	0
hCG14576.3	152113	probe	177	152	1/ IVT	440.37	0.75	0.39	440.37	1.33	1
hCG14577.2	209022	probe	164	28	1/ IVT	148.89	1.5	0.13	99.02	0.67	0
hCG14584.3	146228	probe	126	94	1/ IVT	190.62	-0.19	0.17	190.62	5.22	1
hCG14596.3	148303	probe	53	71	1/ IVT	35982.2	71.19	29.35	505.47	0.04	0
hCG14597.2	198904	probe	196	61	1/ IVT	141.75	1.03	0.13	137.27	0.97	0
hCG14600.3	109956	probe	197	150	1/ IVT	5840.5	29.51	5.16	197.94	0.05	0
hCG14602.2	118423	probe	43	79	1/ IVT	26646.5	86.1	21.73	309.48	0.04	0
hCG14603.2	108808	probe	171	10	1/ IVT	200.85	1.64	0.18	122.6	0.61	0
hCG14605.3	132503	probe	45	96	1/ IVT	154.16	1.29	0.13	119.93	0.78	0
hCG14606.3	150130	probe	179	129	1/ IVT	99.23	-2.47	0.09	99.23	0.41	1
hCG14609.3	169226	probe	132	52	1/ IVT	674043	70.05	595.05	9622.48	0.04	0
hCG14612.3	137064	probe	185	152	1/ IVT	3456.69	23.06	3.05	149.88	0.06	0
hCG14613.3	155778	probe	8	127	1/ IVT	71678.5	69.42	58.46	1032.53	0.04	0
hCG14613.3	140164	probe	73	109	1/ IVT	460816	98.05	375.87	4699.66	0.04	0
hCG14614.4	203620	probe	169	117	1/ IVT	40873.5	71.22	36.08	573.9	0.04	0
hCG14617.2	187514	probe	72	141	1/ IVT	5517.08	28.6	4.5	192.9	0.05	0
hCG14618.3	139986	probe	30	78	1/ IVT	679.1	4.66	0.55	145.77	0.22	0
hCG14619.3	103547	probe	135	151	1/ IVT	154.58	0.09	0.14	154.58	11.07	1
hCG14620.4	102783	probe	166	16	1/ IVT	15459.3	45.57	13.65	339.23	0.04	0
hCG14621.2	110071	probe	115	142	1/ IVT	154.29	-0.78	0.13	154.29	1.28	1
hCG14621.2	136201	probe	185	105	1/ IVT	137.77	0.76	0.12	137.77	1.32	1
hCG14623.2	183774	probe	55	146	1/ IVT	124.29	-0.83	0.1	124.29	1.21	1
hCG14632.3	111529	probe	194	141	1/ IVT	12335	50.83	10.89	242.65	0.04	0
hCG14633.2	188439	probe	228	63	1/ IVT	5059.72	31.91	4.47	158.59	0.05	0
hCG14634.2	172361	probe	52	23	1/ IVT	229.66	-0.15	0.19	229.66	6.5	1
hCG14635.2	174790	probe	61	148	1/ IVT	1022.5	-0.67	0.83	1022.5	1.49	1
hCG14638.4	228467	probe	82	105	1/ IVT	329364	70.61	268.65	4664.36	0.04	0
hCG14640.2	117604	probe	209	118	1/ IVT	11872	61.92	10.48	191.74	0.04	0
hCG14641.2	169324	probe	41	17	1/ IVT	460.95	3.61	0.38	127.73	0.28	0
hCG14644.2	173909	probe	174	125	1/ IVT	93357.5	116.5	82.42	801.34	0.04	64
hCG14645.3	172114	probe	99	54	1/ IVT	339.9	1.39	0.28	244.25	0.72	0
hCG14649.2	207050	probe	133	143	1/ IVT	175.18	-0.3	0.15	175.18	3.34	1
hCG14653.2	201675	probe	14	114	1/ IVT	404.72	1.96	0.33	206.82	0.51	0
hCG14659.3	234521	probe	83	84	1/ IVT	90105	33.75	73.49	2669.84	0.05	0
hCG14660.3	191794	probe	13	41	1/ IVT	34205.7	49.29	27.9	693.93	0.04	0
hCG14664.2	130350	probe	76	44	1/ IVT	253.39	0.92	0.21	253.39	1.09	1
hCG14667.2	170254	probe	85	113	1/ IVT	322.95	-0.66	0.26	322.95	1.52	1
hCG14669.3	212190	probe	97	116	1/ IVT	7002.09	20.74	5.71	337.64	0.06	0
hCG14672.3	218394	probe	9	134	1/ IVT	1034.25	0.18	0.84	1034.25	5.55	1
hCG14672.3	123272	probe	178	33	1/ IVT	10511.4	54.76	9.28	191.96	0.04	0
hCG14673.4	143862	probe	163	82	1/ IVT	6354.89	60.12	5.61	105.71	0.04	0
hCG14674.5	227246	probe	32	6	1/ IVT	23482.2	46.07	19.15	509.73	0.04	0
hCG14674.5	199582	probe	50	11	1/ IVT	13643	43.1	11.13	316.52	0.04	0
hCG14677.2	170090	probe	228	41	1/ IVT	13815	40.03	12.2	345.12	0.05	0
hCG14678.2	234387	probe	188	115	1/ IVT	15820.9	53.75	13.97	294.33	0.04	0
hCG14689.3	212787	probe	32	146	1/ IVT	31314	67.92	25.54	461.03	0.04	0
hCG14690.3	119847	probe	11	53	1/ IVT	2288.13	8.56	1.87	267.39	0.12	0
hCG14691.3	142626	probe	58	13	1/ IVT	70141.8	64.67	57.21	1084.64	0.04	0
hCG14691.3	226488	probe	177	125	1/ IVT	7344.34	46.37	6.48	158.4	0.04	0
hCG14693.4	204612	probe	28	5	1/ IVT	670.35	13.41	0.55	49.99	0.08	0
hCG14693.4	192630	probe	87	3	1/ IVT	380.48	-0.39	0.31	380.48	2.6	1
hCG14694.2	161075	probe	146	31	1/ IVT	241.82	-0.9	0.21	241.82	1.11	1
hCG14696.4	218651	probe	28	55	1/ IVT	1035.6	2.42	0.84	427.07	0.41	0
hCG14696.4	156333	probe	83	109	1/ IVT	1204.34	17.09	0.98	70.46	0.07	0
hCG14696.4	218455	probe	151	138	1/ IVT	228.18	0.25	0.2	228.18	4.06	1
hCG14697.3	158495	probe	32	101	1/ IVT	20702.4	72.27	16.89	286.47	0.04	0
hCG14700.4	110562	probe	232	124	1/ IVT	24861.3	61.99	21.95	401.05	0.04	0
hCG14702.4	143954	probe	156	24	1/ IVT	9279.33	66.37	8.19	139.81	0.04	0
hCG14704.3	147355	probe	104	141	1/ IVT	4527.5	24.34	3.69	186	0.05	0
hCG14709.3	208898	probe	52	106	1/ IVT	3367.55	7.82	2.75	430.67	0.13	0
hCG14713.2	220032	probe	34	7	1/ IVT	2408.14	5.57	1.96	432.27	0.18	0
hCG14713.2	124173	probe	103	91	1/ IVT	3387.84	25.51	2.76	132.81	0.05	0
hCG14715.3	185108	probe	76	34	1/ IVT	9807.77	18.21	8	538.63	0.07	0
hCG14716.2	141862	probe	144	57	1/ IVT	28034.2	49.19	24.75	569.87	0.04	0
hCG14722.3	217334	probe	135	76	1/ IVT	1984.1	7.62	1.75	260.54	0.14	0
hCG14722.3	201256	probe	138	158	1/ IVT	229.78	1.23	0.2	187.57	0.82	0
hCG14729.3	105991	probe	138	28	1/ IVT	348.71	-1.88	0.31	348.71	0.53	1
hCG14731.3	102968	probe	31	75	1/ IVT	1980.01	6.29	1.62	314.86	0.16	64
hCG14731.3	225704	probe	233	58	1/ IVT	6920.01	58.16	6.11	118.98	0.04	0
hCG14741.3	150470	probe	25	45	1/ IVT	400.22	2.04	0.33	196.33	0.49	0
hCG14741.3	148630	probe	47	151	1/ IVT	135	1.11	0.11	121.33	0.9	0
hCG14742.2	207176	probe	152	43	1/ IVT	6967.94	32.4	6.15	215.08	0.05	0
hCG14744.3	202286	probe	85	88	1/ IVT	6097.75	20.67	4.97	295	0.06	0
hCG14746.3	160951	probe	175	75	1/ IVT	74503.4	107.05	65.77	696	0.04	0
hCG14748.2	130493	probe	202	39	1/ IVT	22862	59.56	20.18	383.85	0.04	0
hCG14749.3	181822	probe	196	152	1/ IVT	301.16	4.03	0.27	74.76	0.25	0
hCG14750.3	195779	probe	121	11	1/ IVT	389.13	3.91	0.34	99.43	0.26	0
hCG14752.2	191248	probe	49	93	1/ IVT	486.5	0.42	0.4	486.5	2.41	1
hCG14753.3	115349	probe	86	97	1/ IVT	7088.24	25.46	5.78	278.45	0.05	0
hCG14753.3	205525	probe	235	61	1/ IVT	19013.2	45.31	16.78	419.65	0.04	0
hCG14759.4	209820	probe	15	5	1/ IVT	272.91	0.24	0.22	272.91	4.21	1
hCG14763.4	108463	probe	105	11	1/ IVT	3199.89	23.46	2.61	136.39	0.06	0
hCG14764.2	126350	probe	83	89	1/ IVT	2514.74	5.17	2.05	486.33	0.2	0
hCG14765.2	125747	probe	118	30	1/ IVT	1901.58	16.59	1.55	114.61	0.07	0
hCG14767.3	123436	probe	216	52	1/ IVT	231.84	1.53	0.2	151.94	0.66	0
hCG14769.3	187792	probe	115	85	1/ IVT	172.83	0.54	0.14	172.83	1.86	1
hCG14777.3	202437	probe	142	106	1/ IVT	2619.42	16.97	2.31	154.36	0.07	0
hCG14778.2	168384	probe	57	130	1/ IVT	4061.19	26.3	3.31	154.42	0.05	0
hCG14780.3	227404	probe	90	59	1/ IVT	452.55	4.26	0.37	106.29	0.24	0
hCG14780.3	173071	probe	125	67	1/ IVT	25110.2	41.84	22.17	600.1	0.05	0
hCG14780.3	223108	probe	149	154	1/ IVT	199.09	0.33	0.18	199.09	3	1
hCG14780.3	118944	probe	158	152	1/ IVT	2057.74	8.65	1.82	237.91	0.12	0
hCG14782.3	120804	probe	232	97	1/ IVT	2952.03	33.76	2.61	87.43	0.05	0
hCG14785.3	191146	probe	171	137	1/ IVT	780.16	1.15	0.69	675.95	0.87	0
hCG14790.3	202882	probe	45	75	1/ IVT	254.39	-0.04	0.21	254.39	25.57	1
hCG14791.3	103752	probe	11	75	1/ IVT	16304.2	79.31	13.3	205.59	0.04	0
hCG14791.3	218954	probe	166	114	1/ IVT	2765.44	16.01	2.44	172.78	0.07	0
hCG14793.3	190614	probe	122	31	1/ IVT	29994.1	63.11	26.48	475.25	0.04	0
hCG14799.3	194399	probe	158	103	1/ IVT	4290.95	23.83	3.79	180.04	0.06	0
hCG14802.2	221617	probe	28	75	1/ IVT	5095.34	9.08	4.16	561.1	0.12	0
hCG14802.2	129445	probe	34	113	1/ IVT	66483.8	80.24	54.23	828.56	0.04	0
hCG14802.2	104683	probe	70	47	1/ IVT	130715	110.08	106.62	1187.44	0.04	64
hCG14804.3	196546	probe	192	139	1/ IVT	396.53	4.91	0.35	80.79	0.21	0
hCG14806.3	130652	probe	145	123	1/ IVT	89136.6	71.75	78.69	1242.31	0.04	0
hCG14809.2	130161	probe	6	21	1/ IVT	18096.8	65.31	14.76	277.1	0.04	0
hCG14816.3	164637	probe	238	88	1/ IVT	3677.73	11.91	3.25	308.89	0.09	0
hCG14817.5	104054	probe	129	62	1/ IVT	32058.1	80.14	28.3	400.05	0.04	0
hCG14819.2	202789	probe	178	61	1/ IVT	117.52	0.01	0.1	117.52	87.23	1
hCG14822.3	173748	probe	224	26	1/ IVT	77076.6	98.77	68.04	780.35	0.04	0
hCG14827.2	182075	probe	166	28	1/ IVT	20749.3	66.03	18.32	314.25	0.04	0
hCG14830.3	154060	probe	47	75	1/ IVT	109.9	0.46	0.09	109.9	2.17	1
hCG14830.3	121829	probe	63	159	1/ IVT	122.3	0.79	0.1	122.3	1.27	1
hCG14832.3	193786	probe	95	50	1/ IVT	17438.1	26.28	14.22	663.61	0.05	0
hCG14833.3	153369	probe	158	67	1/ IVT	1865.69	8.73	1.65	213.71	0.12	0
hCG14834.3	171124	probe	58	93	1/ IVT	190.25	-0.48	0.16	190.25	2.07	1
hCG14835.3	177517	probe	65	132	1/ IVT	166.07	0.34	0.14	166.07	2.94	1
hCG14838.2	104531	probe	102	73	1/ IVT	141.91	-1.29	0.12	141.91	0.78	1
hCG14841.3	133100	probe	19	12	1/ IVT	4153.02	18.81	3.39	220.77	0.06	0
hCG14844.3	204967	probe	206	28	1/ IVT	145.15	-0.3	0.13	145.15	3.28	1
hCG14845.4	186150	probe	189	11	1/ IVT	35723.9	28.53	31.54	1252.02	0.05	0
hCG14846.3	204492	probe	203	63	1/ IVT	24558.9	60.97	21.68	402.77	0.04	0
hCG14846.3	216320	probe	209	22	1/ IVT	29595.9	46.89	26.13	631.16	0.04	0
hCG14847.3	198202	probe	209	46	1/ IVT	44232.4	43.33	39.05	1020.71	0.04	0
hCG14851.3	162225	probe	204	1	1/ IVT	706.23	1.63	0.62	432.56	0.61	0
hCG14854.2	167237	probe	111	87	1/ IVT	5293.36	15.51	4.32	341.33	0.07	0
hCG14854.2	228828	probe	113	99	1/ IVT	134.19	-1.04	0.11	134.19	0.97	1
hCG14855.3	188340	probe	98	117	1/ IVT	19310.6	40.27	15.75	479.51	0.04	0
hCG14859.2	118915	probe	72	102	1/ IVT	12111.5	49	9.88	247.18	0.04	0
hCG14860.3	195028	probe	135	24	1/ IVT	121.58	-1.03	0.11	121.58	0.98	1
hCG14867.3	105152	probe	190	64	1/ IVT	171.18	1.37	0.15	124.66	0.73	0
hCG14868.3	236864	probe	34	3	1/ IVT	52641.7	92.48	42.94	569.2	0.04	0
hCG14869.3	216283	probe	139	16	1/ IVT	74295.5	27.07	65.59	2744.53	0.05	0
hCG14870.4	211315	probe	209	133	1/ IVT	245.67	0.8	0.22	245.67	1.24	1
hCG14873.3	130933	probe	34	39	1/ IVT	89.6	0.09	0.07	89.6	11.19	1
hCG14874.3	204252	probe	227	62	1/ IVT	24287.1	48.43	21.44	501.46	0.04	0
hCG14878.3	187450	probe	26	76	1/ IVT	2835.33	1.54	2.31	1843.85	0.65	0
hCG14879.2	180233	probe	98	118	1/ IVT	149468	52.33	121.91	2856.03	0.04	0
hCG14880.2	149216	probe	135	138	1/ IVT	80.75	-2.11	0.07	80.75	0.48	1
hCG14882.3	139262	probe	22	89	1/ IVT	171463	122.13	139.85	1403.9	0.04	64
hCG14883.2	195525	probe	10	74	1/ IVT	13462	17.44	10.98	771.99	0.07	0
hCG14884.5	188985	probe	46	4	1/ IVT	766.37	2.12	0.63	362.16	0.47	0
hCG14889.1	178122	probe	115	121	1/ IVT	1121.1	5.92	0.91	189.27	0.17	0
hCG14891.3	104667	probe	127	121	1/ IVT	7355.98	19.89	6.49	369.77	0.06	0
hCG14894.2	202506	probe	154	92	1/ IVT	215.25	-0.9	0.19	215.25	1.11	1
hCG14905.4	210232	probe	37	93	1/ IVT	221.53	-1.18	0.18	221.53	0.85	1
hCG14906.4	113157	probe	92	1	1/ IVT	2572.47	14.44	2.1	178.2	0.08	0
hCG14908.2	100777	probe	23	13	1/ IVT	40459.7	86.74	33	466.44	0.04	0
hCG14909.2	103999	probe	139	38	1/ IVT	155138	97.13	136.96	1597.16	0.04	0
hCG14910.3	156272	probe	28	50	1/ IVT	19867.6	73.53	16.21	270.22	0.04	0
hCG14913.3	136439	probe	42	122	1/ IVT	703.85	2.64	0.57	266.31	0.38	0
hCG14914.3	140473	probe	65	49	1/ IVT	4153.46	4.61	3.39	900.95	0.22	0
hCG14915.3	216623	probe	177	46	1/ IVT	16874.9	59.63	14.9	282.98	0.04	0
hCG14916.3	177518	probe	185	29	1/ IVT	39516.6	94.5	34.89	418.15	0.04	0
hCG14916.3	211045	probe	210	151	1/ IVT	44188.6	64.06	39.01	689.8	0.04	0
hCG14917.2	128885	probe	66	37	1/ IVT	5398.35	45.14	4.4	119.6	0.04	0
hCG14917.2	206130	probe	224	64	1/ IVT	8817.17	28.13	7.78	313.43	0.05	0
hCG14919.3	130772	probe	232	34	1/ IVT	262632	110.21	231.85	2383.02	0.04	0
hCG14921.2	210392	probe	107	138	1/ IVT	2684.51	4.03	2.19	665.63	0.25	0
hCG14922.3	157895	probe	41	76	1/ IVT	10688.6	31.99	8.72	334.15	0.05	0
hCG14925.4	175901	probe	14	7	1/ IVT	1247.68	2.07	1.02	603.69	0.49	0
hCG14926.4	221562	probe	88	72	1/ IVT	161719	43.51	131.91	3717.06	0.04	0
hCG14926.4	106774	probe	156	30	1/ IVT	221990	81.03	195.97	2739.53	0.04	0
hCG14926.4	148548	probe	238	144	1/ IVT	258754	65.77	228.43	3934.05	0.04	0
hCG14927.3	227114	probe	131	109	1/ IVT	150.85	2.5	0.13	60.4	0.4	64
hCG14928.4	102234	probe	159	50	1/ IVT	150.2	1.92	0.13	78.27	0.52	0
hCG14929.3	132658	probe	27	89	1/ IVT	70792.5	116.99	57.74	605.11	0.04	64
hCG14930.3	156705	probe	26	26	1/ IVT	108.52	0.68	0.09	108.52	1.47	1
hCG14932.4	233803	probe	142	111	1/ IVT	23043.6	55.4	20.34	415.97	0.04	0
hCG14933.2	160273	probe	29	17	1/ IVT	2028.42	18.22	1.65	111.31	0.07	0
hCG14941.3	108345	probe	6	116	1/ IVT	1515.21	14.6	1.24	103.81	0.08	0
hCG14944.2	169776	probe	144	105	1/ IVT	14331.9	52.51	12.65	272.92	0.04	0
hCG14946.2	171458	probe	186	113	1/ IVT	38.51	0.01	0.03	38.51	135.59	1
hCG14948.5	102454	probe	48	95	1/ IVT	10118.7	21.81	8.25	464.03	0.06	0
hCG14950.3	107652	probe	141	147	1/ IVT	22068.9	54.05	19.48	408.28	0.04	0
hCG14958.3	108059	probe	18	29	1/ IVT	11188.2	58.58	9.13	191	0.04	0
hCG14959.4	167643	probe	55	54	1/ IVT	22934.1	69.59	18.71	329.57	0.04	0
hCG14960.2	167128	probe	171	109	1/ IVT	582.22	3.12	0.51	186.37	0.32	0
hCG14961.2	181182	probe	136	92	1/ IVT	1597.54	0.91	1.41	1597.54	1.1	1
hCG14965.2	162210	probe	239	138	1/ IVT	278.26	-0.07	0.25	278.26	14.14	1
hCG14966.2	100064	probe	172	116	1/ IVT	158.03	-0.68	0.14	158.03	1.47	1
hCG14967.4	139377	probe	171	44	1/ IVT	315.5	2.32	0.28	136.12	0.43	0
hCG14971.3	178162	probe	21	127	1/ IVT	384.77	3.34	0.31	115.36	0.3	0
hCG14977.3	159086	probe	81	24	1/ IVT	6006.1	30.88	4.9	194.51	0.05	0
hCG14981.3	194900	probe	19	109	1/ IVT	6110.02	27.77	4.98	220	0.05	0
hCG14983.3	225552	probe	126	106	1/ IVT	9799.15	36.63	8.65	267.5	0.05	0
hCG14983.3	126513	probe	213	58	1/ IVT	609.05	2.04	0.54	298.42	0.49	0
hCG14991.2	187241	probe	47	26	1/ IVT	1738.53	0.35	1.42	1738.53	2.83	1
hCG14993.3	138581	probe	77	113	1/ IVT	4287.66	4.5	3.5	953.64	0.23	0
hCG14996.4	115785	probe	139	76	1/ IVT	1.14916e+06	91.08	1014.48	12616.5	0.04	0
hCG14997.4	205933	probe	191	48	1/ IVT	10159.2	46.99	8.97	216.18	0.04	0
hCG14998.3	143936	probe	50	85	1/ IVT	529.89	-0.07	0.43	529.89	13.66	1
hCG14999.2	187086	probe	55	32	1/ IVT	180.69	0.71	0.15	180.69	1.4	1
hCG15000.3	156020	probe	11	52	1/ IVT	9317.12	9.07	7.6	1027.63	0.12	0
hCG15003.2	151138	probe	62	37	1/ IVT	479.72	3.32	0.39	144.37	0.3	0
hCG15009.2	104402	probe	48	113	1/ IVT	13204.4	46.5	10.77	283.98	0.04	0
hCG15009.2	125028	probe	217	22	1/ IVT	7398.87	32.68	6.53	226.38	0.05	0
hCG15010.3	175201	probe	226	102	1/ IVT	2372.91	24.66	2.09	96.21	0.06	0
hCG15011.4	103115	probe	25	118	1/ IVT	350.65	2.52	0.29	139.06	0.4	0
hCG15016.3	211942	probe	230	123	1/ IVT	29609	40.63	26.14	728.74	0.05	0
hCG15017.3	192036	probe	198	113	1/ IVT	3926.03	11.6	3.47	338.45	0.09	0
hCG15018.5	185093	probe	36	126	1/ IVT	2749.19	13.18	2.24	208.53	0.08	0
hCG15018.5	155786	probe	57	65	1/ IVT	7559.48	35.23	6.17	214.58	0.05	0
hCG15018.5	170287	probe	145	155	1/ IVT	18075.6	24.76	15.96	729.99	0.06	0
hCG15020.3	153575	probe	14	104	1/ IVT	10936.7	46.64	8.92	234.5	0.04	0
hCG15021.3	176097	probe	151	13	1/ IVT	375.01	2.59	0.33	144.72	0.39	0
hCG15022.3	183711	probe	48	87	1/ IVT	24666.6	34.02	20.12	725.14	0.05	0
hCG15023.2	161767	probe	151	22	1/ IVT	379.08	-0.74	0.33	379.08	1.36	1
hCG15024.3	130435	probe	150	96	1/ IVT	5193.72	34.7	4.59	149.67	0.05	0
hCG15026.2	100572	probe	42	95	1/ IVT	200.04	0.07	0.16	200.04	13.73	1
hCG15028.4	203566	probe	25	47	1/ IVT	29184.6	50.26	23.8	580.62	0.04	0
hCG15029.3	180804	probe	6	126	1/ IVT	78860.6	59.04	64.32	1335.79	0.04	0
hCG15033.3	144765	probe	27	16	1/ IVT	83441.4	98.7	68.06	845.4	0.04	0
hCG15038.4	191841	probe	23	109	1/ IVT	114677	99.35	93.54	1154.29	0.04	0
hCG15038.4	196524	probe	62	157	1/ IVT	5208.89	16.9	4.25	308.22	0.07	0
hCG15039.3	200664	probe	172	149	1/ IVT	1018.21	3.69	0.9	276.03	0.27	0
hCG15041.3	118650	probe	13	94	1/ IVT	2118.37	7.49	1.73	282.94	0.14	0
hCG15042.3	191084	probe	19	111	1/ IVT	175159	105.18	142.87	1665.27	0.04	64
hCG15043.2	191984	probe	207	145	1/ IVT	823.77	8.65	0.73	95.27	0.12	0
hCG15045.3	230474	probe	172	95	1/ IVT	705.27	5.5	0.62	128.24	0.19	0
hCG15046.2	187002	probe	34	125	1/ IVT	20954.5	20.54	17.09	1020.35	0.06	0
hCG15047.3	104525	probe	195	92	1/ IVT	6137.92	20.76	5.42	295.62	0.06	0
hCG15048.2	194837	probe	185	70	1/ IVT	107.47	0.82	0.09	107.47	1.23	1
hCG15050.2	188871	probe	186	136	1/ IVT	22504.2	56.9	19.87	395.52	0.04	0
hCG15053.3	206193	probe	97	29	1/ IVT	186.52	-0.21	0.15	186.52	4.71	1
hCG15053.3	234787	probe	133	68	1/ IVT	347.7	-0.58	0.31	347.7	1.73	1
hCG15053.3	137911	probe	147	1	1/ IVT	2343.38	6.57	2.07	356.53	0.16	0
hCG15054.3	188877	probe	145	86	1/ IVT	3715.43	11.76	3.28	316.05	0.09	0
hCG15057.2	110772	probe	110	19	1/ IVT	1062.5	3.34	0.87	318.27	0.3	0
hCG15059.4	125999	probe	235	108	1/ IVT	616.59	1.32	0.54	466.95	0.76	0
hCG15060.3	233509	probe	208	13	1/ IVT	103869	55.89	91.7	1858.39	0.04	0
hCG15064.2	139600	probe	189	28	1/ IVT	4340.27	24.44	3.83	177.58	0.06	0
hCG15065.1	111056	probe	98	78	1/ IVT	5827.79	17.37	4.75	335.58	0.07	0
hCG15066.1	144333	probe	167	99	1/ IVT	191.96	-1	0.17	191.96	1	1
hCG15066.1	163342	probe	184	37	1/ IVT	337.94	3.16	0.3	106.83	0.32	0
hCG15067.1	176437	probe	189	158	1/ IVT	845.2	1.8	0.75	469.09	0.56	0
hCG15068.3	165166	probe	145	82	1/ IVT	1021.08	0.02	0.9	1021.08	52.31	1
hCG15070.3	191055	probe	201	146	1/ IVT	23238.4	40.27	20.51	577.13	0.05	0
hCG15071.3	145163	probe	143	28	1/ IVT	3137.43	17.46	2.77	179.68	0.07	0
hCG15073.3	166773	probe	111	32	1/ IVT	2983.58	1.64	2.43	1815.79	0.61	0
hCG15077.2	146706	probe	43	9	1/ IVT	1007.15	1.7	0.82	592.27	0.59	0
hCG15077.2	169395	probe	170	106	1/ IVT	12399.2	41.16	10.95	301.27	0.05	0
hCG15079.2	177238	probe	29	81	1/ IVT	644.05	5.31	0.53	121.18	0.19	0
hCG15080.2	213187	probe	57	133	1/ IVT	241213	90.25	196.75	2672.67	0.04	0
hCG15091.3	105615	probe	114	137	1/ IVT	6061.96	23.27	4.94	260.52	0.06	0
hCG15093.2	166248	probe	105	56	1/ IVT	838.15	-0.33	0.68	838.15	3.01	1
hCG15095.2	170355	probe	37	142	1/ IVT	7163.47	29.06	5.84	246.48	0.05	0
hCG15097.4	127767	probe	110	36	1/ IVT	153.12	-2.26	0.12	153.12	0.44	1
hCG15098.4	212217	probe	111	28	1/ IVT	3003.34	23.15	2.45	129.74	0.06	0
hCG15105.2	159394	probe	57	102	1/ IVT	33566.9	62.15	27.38	540.08	0.04	0
hCG15106.3	103273	probe	57	12	1/ IVT	3618.98	18.69	2.95	193.67	0.06	0
hCG15108.4	153496	probe	44	13	1/ IVT	246.93	2.15	0.2	115.1	0.47	0
hCG15109.4	216153	probe	102	86	1/ IVT	317.4	-0.73	0.26	317.4	1.37	1
hCG15110.3	112130	probe	212	122	1/ IVT	1785.31	15.67	1.58	113.96	0.07	0
hCG15119.3	204218	probe	157	147	1/ IVT	1114.12	13.43	0.98	82.94	0.08	0
hCG15121.2	190473	probe	143	97	1/ IVT	268767	72.25	237.27	3719.87	0.04	0
hCG15126.3	194101	probe	201	138	1/ IVT	234.25	1.76	0.21	132.96	0.57	0
hCG15136.3	168908	probe	141	5	1/ IVT	2328.21	14.55	2.06	160	0.08	0
hCG15138.4	108723	probe	105	149	1/ IVT	222.58	0.43	0.18	222.58	2.35	1
hCG15140.4	147011	probe	3	59	1/ IVT	9227.44	44.26	7.53	208.47	0.04	0
hCG15140.4	218515	probe	84	82	1/ IVT	994.05	11.58	0.81	85.87	0.09	0
hCG15153.3	100431	probe	57	25	1/ IVT	4838.48	33.35	3.95	145.08	0.05	0
hCG15154.2	109539	probe	141	129	1/ IVT	10103.6	35.23	8.92	286.8	0.05	0
hCG15158.2	108231	probe	231	108	1/ IVT	35931.3	76.7	31.72	468.46	0.04	0
hCG15160.3	161567	probe	139	58	1/ IVT	1931.96	12.99	1.71	148.76	0.09	0
hCG15162.3	133810	probe	129	75	1/ IVT	115495	102.07	101.96	1131.48	0.04	0
hCG15163.2	199618	probe	178	49	1/ IVT	193.21	0.23	0.17	193.21	4.32	1
hCG15165.2	169278	probe	19	110	1/ IVT	59416.9	89.3	48.46	665.38	0.04	64
hCG15167.3	213516	probe	185	122	1/ IVT	191689	83.55	169.22	2294.33	0.04	0
hCG15168.2	104293	probe	36	124	1/ IVT	12632	29.35	10.3	430.37	0.05	0
hCG15169.2	147933	probe	199	57	1/ IVT	247.93	1.33	0.22	186.4	0.75	0
hCG15170.3	155934	probe	97	3	1/ IVT	1047.37	1.8	0.85	582.19	0.56	0
hCG15171.2	148045	probe	101	106	1/ IVT	278.86	0.56	0.23	278.86	1.79	1
hCG15173.3	153630	probe	121	125	1/ IVT	7181.24	9.48	6.34	757.31	0.11	0
hCG15175.3	103729	probe	42	144	1/ IVT	664.71	2.56	0.54	259.95	0.39	0
hCG15176.2	145835	probe	103	158	1/ IVT	2663.28	10.55	2.17	252.5	0.1	0
hCG15177.2	109949	probe	188	83	1/ IVT	221.81	1.91	0.2	116.03	0.52	0
hCG15178.2	138890	probe	183	6	1/ IVT	86.18	0.8	0.08	86.18	1.25	1
hCG15180.3	119175	probe	232	128	1/ IVT	1123.77	3.27	0.99	343.46	0.31	0
hCG15183.3	111525	probe	112	63	1/ IVT	1583.86	9.46	1.29	167.45	0.11	0
hCG15184.2	211361	probe	205	31	1/ IVT	330.37	2.01	0.29	164.74	0.5	0
hCG15185.3	150432	probe	193	14	1/ IVT	19069.5	37.69	16.83	505.95	0.05	0
hCG15188.2	164849	probe	15	130	1/ IVT	12350.5	67.23	10.07	183.7	0.04	0
hCG15190.3	145788	probe	103	51	1/ IVT	1996.43	11.05	1.63	180.75	0.1	0
hCG15192.3	205498	probe	230	159	1/ IVT	32918.9	46.06	29.06	714.77	0.04	0
hCG15193.3	222577	probe	37	54	1/ IVT	192.91	1.31	0.16	146.77	0.76	0
hCG15193.3	192935	probe	52	16	1/ IVT	757.7	-0.35	0.62	757.7	2.84	1
hCG15194.3	165955	probe	79	22	1/ IVT	450.16	2.98	0.37	150.98	0.34	0
hCG15195.3	147806	probe	167	4	1/ IVT	46097	41.89	40.69	1100.45	0.05	0
hCG15197.2	196199	probe	113	74	1/ IVT	497.07	2.31	0.41	215.21	0.43	0
hCG15198.3	100288	probe	226	135	1/ IVT	106.55	-0.09	0.09	106.55	11.55	1
hCG15199.3	190298	probe	217	32	1/ IVT	5737.15	44.42	5.06	129.16	0.04	0
hCG15200.2	167728	probe	230	47	1/ IVT	114262	72.02	100.87	1586.5	0.04	0
hCG15201.3	127096	probe	87	2	1/ IVT	17309.7	22.18	14.12	780.27	0.06	0
hCG15202.3	102988	probe	84	154	1/ IVT	59068.7	42.42	48.18	1392.39	0.04	0
hCG15204.4	162859	probe	135	14	1/ IVT	3866.72	19.28	3.41	200.53	0.06	0
hCG15204.4	163744	probe	138	81	1/ IVT	12790.4	21.48	11.29	595.59	0.06	0
hCG15207.2	147295	probe	18	19	1/ IVT	19768.8	60.38	16.12	327.4	0.04	0
hCG15208.3	164497	probe	83	8	1/ IVT	8376.27	16.17	6.83	517.94	0.07	0
hCG15217.3	122333	probe	26	82	1/ IVT	5962.4	60.7	4.86	98.23	0.04	0
hCG15219.3	142348	probe	10	32	1/ IVT	185.38	-1.39	0.15	185.38	0.72	1
hCG15226.3	222417	probe	137	25	1/ IVT	1193.23	5.89	1.05	202.59	0.17	0
hCG15226.3	171014	probe	179	77	1/ IVT	40104.1	80.54	35.4	497.95	0.04	0
hCG15229.3	118348	probe	159	115	1/ IVT	120.72	1.25	0.11	96.24	0.8	0
hCG15233.3	113324	probe	115	109	1/ IVT	25144.3	17.74	20.51	1416.98	0.07	0
hCG15234.3	164069	probe	195	128	1/ IVT	4441.02	9.57	3.92	463.95	0.11	0
hCG15235.3	187979	probe	142	36	1/ IVT	13679	25.7	12.08	532.23	0.05	0
hCG15236.3	162667	probe	105	3	1/ IVT	1796.44	1.77	1.47	1012.23	0.56	0
hCG15239.3	160885	probe	141	17	1/ IVT	630.98	2.92	0.56	216.18	0.34	0
hCG15244.3	212795	probe	11	147	1/ IVT	152.11	-2.72	0.12	152.11	0.37	1
hCG15249.2	106384	probe	46	23	1/ IVT	601.43	3.06	0.49	196.56	0.33	0
hCG15250.2	165409	probe	233	42	1/ IVT	16776.2	60.06	14.81	279.32	0.04	0
hCG15251.3	152803	probe	90	75	1/ IVT	927.87	3.57	0.76	259.55	0.28	0
hCG15253.2	146073	probe	170	54	1/ IVT	14719.6	28.13	12.99	523.3	0.05	0
hCG15254.3	126360	probe	232	155	1/ IVT	356.92	-0.02	0.32	356.92	45.83	1
hCG15255.3	152376	probe	147	84	1/ IVT	136049	88.45	120.1	1538.22	0.04	0
hCG15256.3	171463	probe	196	85	1/ IVT	173.78	0.71	0.15	173.78	1.42	1
hCG15257.3	215861	probe	95	122	1/ IVT	4727.68	18.82	3.86	251.23	0.06	0
hCG15259.4	145763	probe	112	14	1/ IVT	7275.33	39.86	5.93	182.52	0.04	0
hCG15260.2	226327	probe	104	123	1/ IVT	234.19	1.95	0.19	119.85	0.51	0
hCG15261.4	215653	probe	205	135	1/ IVT	168.5	-0.63	0.15	168.5	1.6	1
hCG15262.2	173075	probe	214	78	1/ IVT	4497.3	16.16	3.97	278.26	0.07	0
hCG15266.3	187739	probe	66	38	1/ IVT	1468.58	14.07	1.2	104.38	0.08	0
hCG15268.3	141854	probe	13	11	1/ IVT	6616.39	44.62	5.4	148.28	0.04	0
hCG15269.2	145935	probe	166	87	1/ IVT	3570.19	24.56	3.15	145.38	0.06	0
hCG15271.4	146890	probe	157	146	1/ IVT	1439.14	17.47	1.27	82.36	0.07	0
hCG15273.2	176593	probe	101	70	1/ IVT	14268.1	24.22	11.64	589.1	0.05	0
hCG15274.3	186303	probe	35	90	1/ IVT	1461.06	7.1	1.19	205.9	0.15	0
hCG15277.2	113797	probe	118	99	1/ IVT	7868.32	29.97	6.42	262.56	0.05	0
hCG15278.3	116420	probe	125	111	1/ IVT	8500.06	38.71	7.5	219.59	0.05	0
hCG15279.3	168202	probe	194	142	1/ IVT	12378	53.58	10.93	231	0.04	0
hCG15280.2	171965	probe	198	121	1/ IVT	1190.44	9.19	1.05	129.58	0.12	0
hCG15280.2	143286	probe	204	26	1/ IVT	523.8	4.88	0.46	107.42	0.21	0
hCG15281.3	186405	probe	53	49	1/ IVT	1356.42	9.65	1.11	140.6	0.11	0
hCG15283.4	204569	probe	144	44	1/ IVT	245.45	0.92	0.22	245.45	1.09	1
hCG15285.3	137428	probe	5	38	1/ IVT	48193.6	93.71	39.31	514.3	0.04	64
hCG15286.4	134027	probe	25	92	1/ IVT	3362.22	24.7	2.74	136.1	0.05	0
hCG15287.3	192382	probe	7	21	1/ IVT	42320.8	95.3	34.52	444.08	0.04	64
hCG15288.3	111527	probe	12	103	1/ IVT	10515.9	58.21	8.58	180.66	0.04	0
hCG15291.3	158624	probe	104	18	1/ IVT	457.5	0.3	0.37	457.5	3.34	1
hCG15295.2	205372	probe	19	23	1/ IVT	160.5	0.14	0.13	160.5	7.24	1
hCG15300.3	184373	probe	35	9	1/ IVT	29105.9	51.65	23.74	563.56	0.04	0
hCG15302.3	169607	probe	47	2	1/ IVT	209854	84.98	171.17	2469.5	0.04	0
hCG15305.3	155534	probe	199	95	1/ IVT	3888.13	33.16	3.43	117.26	0.05	0
hCG15308.2	117474	probe	95	117	1/ IVT	926.38	0.6	0.76	926.38	1.67	1
hCG15313.2	210299	probe	212	152	1/ IVT	291.6	-0.69	0.26	291.6	1.44	1
hCG15317.4	155366	probe	96	98	1/ IVT	268.85	-1.5	0.22	268.85	0.67	1
hCG15318.3	122707	probe	86	102	1/ IVT	196.14	-0.17	0.16	196.14	5.75	1
hCG15320.3	178078	probe	188	149	1/ IVT	120.87	0.64	0.11	120.87	1.56	1
hCG15321.2	180503	probe	115	9	1/ IVT	275.63	-0.79	0.22	275.63	1.27	1
hCG15322.3	112106	probe	232	55	1/ IVT	67.77	-1.28	0.06	67.77	0.78	1
hCG15323.2	216357	probe	69	97	1/ IVT	258.91	-1.06	0.21	258.91	0.94	1
hCG15324.2	214739	probe	211	141	1/ IVT	284.44	2.82	0.25	100.82	0.36	0
hCG15325.3	188733	probe	222	153	1/ IVT	303.89	2.39	0.27	126.95	0.42	0
hCG15326.2	167168	probe	169	106	1/ IVT	233.29	-0.27	0.21	233.29	3.71	1
hCG15327.2	119060	probe	97	99	1/ IVT	693.46	4.24	0.57	163.64	0.24	0
hCG15328.2	115258	probe	89	41	1/ IVT	148.42	-0.22	0.12	148.42	4.59	1
hCG15328.2	198822	probe	165	17	1/ IVT	170.29	4.65	0.15	36.63	0.22	0
hCG15328.2	175745	probe	202	24	1/ IVT	83.88	-0.52	0.07	83.88	1.93	1
hCG15329.2	136671	probe	156	122	1/ IVT	4235.43	25.06	3.74	169.01	0.06	0
hCG15332.2	206733	probe	186	85	1/ IVT	1079.32	6.49	0.95	166.32	0.16	0
hCG15334.2	186288	probe	188	61	1/ IVT	206.21	0.04	0.18	206.21	27.66	1
hCG15338.3	217468	probe	108	103	1/ IVT	1671.74	6.15	1.36	271.85	0.17	0
hCG15338.3	193295	probe	151	51	1/ IVT	138209	69.41	122.01	1991.29	0.04	0
hCG15340.4	189943	probe	125	24	1/ IVT	240.03	2.86	0.21	83.95	0.35	0
hCG15341.4	219722	probe	49	42	1/ IVT	171.97	1.25	0.14	137.59	0.8	0
hCG15341.4	196645	probe	105	141	1/ IVT	412.5	-0.16	0.34	412.5	6.37	1
hCG15344.4	134782	probe	192	133	1/ IVT	140966	67.85	124.44	2077.67	0.04	0
hCG15345.3	208024	probe	148	88	1/ IVT	69299.8	79.71	61.18	869.38	0.04	0
hCG15346.3	115354	probe	196	78	1/ IVT	19700.6	76.78	17.39	256.59	0.04	0
hCG15347.3	115964	probe	52	5	1/ IVT	754.16	4.31	0.62	175	0.23	0
hCG15348.3	199794	probe	137	142	1/ IVT	412.73	-0.61	0.36	412.73	1.65	1
hCG15349.3	129748	probe	162	62	1/ IVT	94.31	-2.27	0.08	94.31	0.44	1
hCG15350.3	202170	probe	39	21	1/ IVT	13380.2	53.9	10.91	248.26	0.04	0
hCG15351.3	213291	probe	49	55	1/ IVT	23583.4	87.87	19.24	268.39	0.04	0
hCG15352.3	141471	probe	73	23	1/ IVT	785.82	3.85	0.64	204.33	0.26	0
hCG15353.3	164701	probe	91	68	1/ IVT	4405.1	22.7	3.59	194.06	0.06	0
hCG15360.2	185378	probe	82	9	1/ IVT	864.4	-0.16	0.71	864.4	6.32	1
hCG15364.3	193266	probe	196	88	1/ IVT	10684.6	35.61	9.43	300.06	0.05	0
hCG15365.4	187621	probe	122	42	1/ IVT	250713	65.7	221.33	3815.78	0.04	0
hCG15366.3	174241	probe	208	98	1/ IVT	12128.9	33.98	10.71	356.92	0.05	0
hCG15367.4	137292	probe	35	63	1/ IVT	28835.6	92.56	23.52	311.52	0.04	64
hCG15368.3	185593	probe	134	85	1/ IVT	3071.37	9.26	2.71	331.6	0.11	0
hCG15369.2	137266	probe	58	108	1/ IVT	302.48	1.62	0.25	186.25	0.62	0
hCG15370.2	198659	probe	26	45	1/ IVT	2227.72	5.33	1.82	417.94	0.19	0
hCG15371.4	141286	probe	188	27	1/ IVT	637292	130.15	562.6	4896.74	0.04	64
hCG15379.3	190556	probe	111	38	1/ IVT	5064.48	29.62	4.13	170.96	0.05	0
hCG15381.3	105756	probe	116	93	1/ IVT	155.14	0.15	0.13	155.14	6.73	1
hCG15383.3	186437	probe	57	143	1/ IVT	3635.31	18.31	2.97	198.55	0.07	0
hCG15384.3	192455	probe	146	95	1/ IVT	599.35	3.55	0.53	168.84	0.28	0
hCG15386.4	178419	probe	187	70	1/ IVT	13156.3	81.59	11.61	161.25	0.04	0
hCG15389.3	188497	probe	202	11	1/ IVT	7185.12	37.81	6.34	190.01	0.05	0
hCG15391.2	149090	probe	229	48	1/ IVT	17522.7	30.61	15.47	572.41	0.05	0
hCG15392.3	101811	probe	50	26	1/ IVT	1.12714e+06	55.74	919.36	20222.7	0.04	0
hCG15392.3	158861	probe	68	10	1/ IVT	2095.62	0.24	1.71	2095.62	4.1	1
hCG15395.3	128906	probe	17	57	1/ IVT	843.82	4.28	0.69	196.97	0.24	0
hCG15397.3	191995	probe	50	89	1/ IVT	1230.99	7.78	1	158.22	0.13	0
hCG15397.3	217072	probe	229	130	1/ IVT	110.57	0.38	0.1	110.57	2.62	1
hCG15398.4	108119	probe	47	111	1/ IVT	7672.7	23.56	6.26	325.73	0.06	0
hCG15398.4	156380	probe	202	70	1/ IVT	925.3	1.95	0.82	474.42	0.51	0
hCG15399.2	179403	probe	49	148	1/ IVT	500.28	-1.36	0.41	500.28	0.73	1
hCG15400.2	132738	probe	18	73	1/ IVT	139.42	1.17	0.11	118.99	0.85	0
hCG15401.4	208328	probe	15	159	1/ IVT	29432.3	72.49	24.01	406.03	0.04	0
hCG15403.1	172623	probe	22	68	1/ IVT	489.96	1.39	0.4	353.26	0.72	0
hCG15404.2	143083	probe	205	101	1/ IVT	41649.5	79.29	36.77	525.27	0.04	0
hCG15406.3	120488	probe	189	105	1/ IVT	734.8	-1.41	0.65	734.8	0.71	1
hCG15408.2	146597	probe	94	34	1/ IVT	31574.7	56.65	25.75	557.36	0.04	0
hCG15412.2	107810	probe	24	142	1/ IVT	61624.6	107.38	50.26	573.88	0.04	64
hCG15413.2	171390	probe	202	122	1/ IVT	78836.7	61.76	69.6	1276.49	0.04	0
hCG15414.3	131715	probe	105	46	1/ IVT	2320.93	9.7	1.89	239.18	0.11	0
hCG15415.4	213482	probe	63	144	1/ IVT	956.1	6.92	0.78	138.14	0.15	0
hCG15422.3	226738	probe	5	139	1/ IVT	5351.86	36.75	4.37	145.64	0.04	0
hCG15424.2	116812	probe	173	30	1/ IVT	4820.67	27	4.26	178.56	0.05	0
hCG15425.3	219421	probe	45	32	1/ IVT	2075.71	17.79	1.69	116.69	0.07	0
hCG15425.3	215675	probe	96	23	1/ IVT	285.78	3.44	0.23	83.16	0.29	0
hCG15426.2	206415	probe	54	117	1/ IVT	1817.32	1.51	1.48	1200.29	0.66	0
hCG15426.2	204813	probe	225	103	1/ IVT	340.45	1.77	0.3	192.15	0.57	0
hCG15429.3	194463	probe	194	72	1/ IVT	42441.9	107.35	37.47	395.36	0.04	0
hCG15430.3	137699	probe	107	159	1/ IVT	220.87	-1.77	0.18	220.87	0.57	1
hCG15430.3	217518	probe	189	25	1/ IVT	12987.7	36.77	11.47	353.17	0.05	0
hCG15431.4	103476	probe	94	69	1/ IVT	1633.85	10.07	1.33	162.27	0.11	0
hCG15431.4	112110	probe	105	153	1/ IVT	10501.6	42.14	8.57	249.2	0.04	0
hCG15431.4	214322	probe	191	10	1/ IVT	1711.47	13.82	1.51	123.88	0.08	0
hCG15431.4	135102	probe	209	88	1/ IVT	1598.86	2.22	1.41	718.92	0.45	0
hCG15432.3	235170	probe	68	84	1/ IVT	231.74	0.44	0.19	231.74	2.26	1
hCG15432.3	120519	probe	70	25	1/ IVT	299.62	2.61	0.24	114.84	0.38	0
hCG15433.2	160545	probe	75	64	1/ IVT	10984.6	66.18	8.96	165.97	0.04	0
hCG15434.3	137302	probe	116	67	1/ IVT	13773.9	44.76	11.23	307.71	0.04	0
hCG15437.3	189926	probe	208	11	1/ IVT	201.61	-1.36	0.18	201.61	0.74	1
hCG15438.3	109636	probe	96	145	1/ IVT	26986.7	37.06	22.01	728.24	0.04	0
hCG15439.2	136196	probe	55	50	1/ IVT	18869.7	50.76	15.39	371.78	0.04	0
hCG15440.2	207590	probe	167	114	1/ IVT	183.52	0.13	0.16	183.52	7.81	1
hCG15441.2	174638	probe	223	104	1/ IVT	625.26	0.02	0.55	625.26	48.1	1
hCG15442.3	187636	probe	147	90	1/ IVT	195.8	1.52	0.17	128.55	0.66	0
hCG15443.2	188149	probe	19	157	1/ IVT	12412.5	20.55	10.12	603.98	0.06	0
hCG15444.3	174547	probe	236	101	1/ IVT	237.61	-1.35	0.21	237.61	0.74	1
hCG15445.3	220145	probe	38	139	1/ IVT	875.73	1.1	0.71	799.12	0.91	0
hCG15445.3	193902	probe	215	137	1/ IVT	16475.2	38.11	14.54	432.3	0.05	0
hCG15446.2	203719	probe	121	94	1/ IVT	1526.93	10.58	1.35	144.32	0.1	0
hCG15447.3	129974	probe	238	114	1/ IVT	96.53	-1.89	0.09	96.53	0.53	1
hCG15458.2	123914	probe	207	59	1/ IVT	99.25	2.89	0.09	34.31	0.35	0
hCG15462.4	210569	probe	70	92	1/ IVT	11998.1	51	9.79	235.27	0.04	0
hCG15462.4	217852	probe	215	83	1/ IVT	5650.13	38.02	4.99	148.59	0.05	0
hCG15463.2	158312	probe	139	44	1/ IVT	47514.6	69.12	41.95	687.47	0.04	0
hCG15465.3	101798	probe	168	42	1/ IVT	152.1	2.16	0.13	70.37	0.46	0
hCG15466.2	176265	probe	88	96	1/ IVT	283.77	1.5	0.23	189.76	0.67	0
hCG15468.3	159602	probe	173	91	1/ IVT	349.28	6.77	0.31	51.59	0.15	0
hCG15469.2	200796	probe	27	88	1/ IVT	22952.2	71.77	18.72	319.81	0.04	0
hCG15470.3	173780	probe	22	77	1/ IVT	93075.6	103.86	75.92	896.13	0.04	0
hCG15472.3	192373	probe	154	50	1/ IVT	330.82	0.98	0.29	330.82	1.02	1
hCG15474.4	187105	probe	34	152	1/ IVT	15097.6	68.96	12.31	218.92	0.04	0
hCG15475.3	133014	probe	47	59	1/ IVT	7555.74	70.09	6.16	107.81	0.04	0
hCG15476.3	193186	probe	65	22	1/ IVT	518.85	0.18	0.42	518.85	5.6	1
hCG15476.3	109922	probe	70	94	1/ IVT	621.64	0.26	0.51	621.64	3.83	1
hCG15477.4	167007	probe	43	25	1/ IVT	1203.58	10.79	0.98	111.58	0.1	0
hCG15478.3	158652	probe	94	150	1/ IVT	161120	46.38	131.42	3474.1	0.04	0
hCG15479.4	132805	probe	89	46	1/ IVT	257.68	0.13	0.21	257.68	7.75	1
hCG15479.4	225854	probe	177	105	1/ IVT	581.73	12.12	0.51	48.01	0.09	0
hCG15480.3	156311	probe	7	141	1/ IVT	2223.27	3.07	1.81	723.7	0.33	0
hCG15481.2	195908	probe	158	130	1/ IVT	832.07	6.59	0.73	126.26	0.16	0
hCG15483.2	201615	probe	156	16	1/ IVT	651.53	1.54	0.58	423.06	0.65	0
hCG15484.1	166813	probe	154	73	1/ IVT	39374.9	77.7	34.76	506.77	0.04	0
hCG15485.3	174314	probe	31	90	1/ IVT	308.91	-0.24	0.25	308.91	4.24	1
hCG15491.3	156523	probe	112	9	1/ IVT	1218.99	5.48	0.99	222.56	0.19	0
hCG15492.4	168176	probe	154	36	1/ IVT	3347.63	30.85	2.96	108.5	0.05	0
hCG15493.3	105113	probe	166	23	1/ IVT	744.89	4.91	0.66	151.57	0.21	0
hCG15493.3	108049	probe	168	35	1/ IVT	76495.8	71.23	67.53	1073.88	0.04	0
hCG15494.2	129040	probe	134	10	1/ IVT	91.55	-1.61	0.08	91.55	0.62	1
hCG15495.3	169003	probe	78	7	1/ IVT	100.53	-0.99	0.08	100.53	1.01	1
hCG15497.4	182185	probe	172	125	1/ IVT	5623.16	6.93	4.96	811.84	0.15	0
hCG15499.4	112323	probe	232	38	1/ IVT	125.27	-1	0.11	125.27	1	1
hCG15506.3	227870	probe	30	28	1/ IVT	701.82	6.77	0.57	103.73	0.15	0
hCG15506.3	100340	probe	215	91	1/ IVT	40507	48.65	35.76	832.64	0.04	0
hCG15507.2	193606	probe	136	97	1/ IVT	48555.8	60.27	42.86	805.69	0.04	0
hCG15511.4	127860	probe	206	126	1/ IVT	341.28	2.64	0.3	129.28	0.38	0
hCG15512.3	136614	probe	22	22	1/ IVT	282.05	-0.04	0.23	282.05	23.65	1
hCG15515.3	121141	probe	114	57	1/ IVT	4199.33	25.54	3.43	164.42	0.05	0
hCG15516.3	150768	probe	54	126	1/ IVT	34722.9	27.78	28.32	1249.97	0.05	0
hCG15516.3	112181	probe	130	63	1/ IVT	21763.9	53.98	19.21	403.15	0.04	0
hCG15518.3	201682	probe	192	12	1/ IVT	473.73	-0.53	0.42	473.73	1.88	1
hCG15519.2	134034	probe	93	29	1/ IVT	563.64	0.72	0.46	563.64	1.4	1
hCG15520.3	148963	probe	101	7	1/ IVT	366.65	0.73	0.3	366.65	1.37	1
hCG15521.3	212778	probe	174	55	1/ IVT	54232.4	120.2	47.88	451.18	0.04	64
hCG15522.4	145220	probe	128	8	1/ IVT	390052	39.39	344.34	9903.16	0.05	0
hCG15525.3	126764	probe	163	18	1/ IVT	67.94	-0.29	0.06	67.94	3.46	1
hCG15525.3	222961	probe	207	41	1/ IVT	448.4	8.06	0.4	55.65	0.13	0
hCG15528.2	155347	probe	158	150	1/ IVT	400973	71.76	353.98	5587.67	0.04	0
hCG15528.2	210850	probe	210	32	1/ IVT	201328	86.48	177.73	2327.93	0.04	0
hCG15529.4	181116	probe	239	37	1/ IVT	6844.65	34.63	6.04	197.65	0.05	0
hCG15532.3	162394	probe	211	3	1/ IVT	751.12	7.83	0.66	95.9	0.13	0
hCG15535.3	176882	probe	178	138	1/ IVT	426.74	3.2	0.38	133.18	0.31	0
hCG15536.3	163129	probe	2	146	1/ IVT	6315.47	72.54	5.15	87.06	0.04	0
hCG15537.3	226129	probe	214	121	1/ IVT	92987.4	81.11	82.09	1146.4	0.04	0
hCG15540.2	200734	probe	216	56	1/ IVT	17933.3	38.79	15.83	462.28	0.05	0
hCG15541.3	101368	probe	11	132	1/ IVT	695.91	2.44	0.57	285.55	0.41	0
hCG15542.3	134875	probe	177	8	1/ IVT	8066.49	47.16	7.12	171.04	0.04	0
hCG15543.3	153653	probe	215	125	1/ IVT	799.69	9.21	0.71	86.82	0.12	0
hCG15552.2	110915	probe	227	104	1/ IVT	565.32	4.42	0.5	127.96	0.23	0
hCG15553.3	136748	probe	185	116	1/ IVT	40.71	0.61	0.04	40.71	1.63	1
hCG15554.2	102046	probe	68	24	1/ IVT	25326.5	73.03	20.66	346.78	0.04	0
hCG15558.2	210016	probe	152	8	1/ IVT	1200.7	2.6	1.06	461.15	0.39	0
hCG15559.2	191646	probe	79	75	1/ IVT	76209.1	77.76	62.16	980.09	0.04	0
hCG15560.4	122582	probe	13	3	1/ IVT	6559.27	29.83	5.35	219.92	0.05	0
hCG15565.3	168970	probe	64	90	1/ IVT	564.91	4.79	0.46	117.84	0.21	0
hCG15565.3	119157	probe	164	150	1/ IVT	1185.64	3.28	1.05	361.29	0.31	0
hCG15566.2	121075	probe	172	147	1/ IVT	11937.2	36.82	10.54	324.22	0.05	0
hCG15567.2	170466	probe	32	108	1/ IVT	1295.3	10.96	1.06	118.21	0.1	0
hCG15568.2	146625	probe	185	50	1/ IVT	15513.5	68.65	13.7	225.97	0.04	0
hCG15569.4	180202	probe	178	65	1/ IVT	94811.1	86.99	83.7	1089.85	0.04	0
hCG15571.4	191423	probe	109	49	1/ IVT	2118.75	12.95	1.73	163.6	0.09	0
hCG15574.3	180557	probe	8	14	1/ IVT	863.74	6.45	0.7	133.86	0.16	0
hCG15574.3	205626	probe	58	77	1/ IVT	3259.19	14.25	2.66	228.64	0.08	0
hCG15576.3	128692	probe	179	8	1/ IVT	17553.6	52.44	15.5	334.72	0.04	0
hCG15577.3	142705	probe	36	113	1/ IVT	9221.34	32.16	7.52	286.73	0.05	0
hCG15578.3	179970	probe	170	68	1/ IVT	6103.02	43.88	5.39	139.08	0.04	0
hCG15578.3	108602	probe	227	34	1/ IVT	2937.33	24.16	2.59	121.59	0.06	0
hCG15579.3	198352	probe	97	101	1/ IVT	37272.3	85.78	30.4	434.52	0.04	0
hCG15580.3	191345	probe	227	2	1/ IVT	992.35	4.06	0.88	244.36	0.25	0
hCG15581.4	105226	probe	19	159	1/ IVT	24426.4	53.48	19.92	456.77	0.04	0
hCG15582.2	152213	probe	125	138	1/ IVT	6811.12	28.17	6.01	241.81	0.05	0
hCG15583.3	209528	probe	165	30	1/ IVT	18733.8	52.69	16.54	355.58	0.04	0
hCG15585.2	105160	probe	90	41	1/ IVT	1108.8	2.65	0.9	417.78	0.38	0
hCG15587.3	120638	probe	226	148	1/ IVT	4627.99	11.31	4.09	409.27	0.1	0
hCG15590.3	216585	probe	225	13	1/ IVT	106.77	-1.51	0.09	106.77	0.66	1
hCG15599.3	149049	probe	133	111	1/ IVT	312.66	1.55	0.28	201.74	0.65	0
hCG15602.3	123083	probe	204	11	1/ IVT	3655.7	41.45	3.23	88.2	0.05	0
hCG15603.3	218178	probe	34	16	1/ IVT	2212.06	20.59	1.8	107.42	0.06	0
hCG15603.3	162214	probe	116	23	1/ IVT	1482.62	22.55	1.21	65.74	0.06	0
hCG15606.3	131020	probe	42	116	1/ IVT	3092.06	3.34	2.52	926.98	0.3	0
hCG15607.3	126010	probe	101	88	1/ IVT	1926.88	5.86	1.57	328.56	0.17	0
hCG15609.3	120176	probe	16	24	1/ IVT	32750	71.85	26.71	455.81	0.04	0
hCG15612.3	162894	probe	218	141	1/ IVT	1688.2	12.03	1.49	140.34	0.09	0
hCG15613.3	222126	probe	96	144	1/ IVT	245.41	-1.32	0.2	245.41	0.76	1
hCG15613.3	152616	probe	114	65	1/ IVT	609.76	2.08	0.5	292.5	0.48	0
hCG15614.2	142986	probe	119	125	1/ IVT	13142.5	39.64	10.72	331.56	0.04	0
hCG15615.3	115147	probe	66	157	1/ IVT	346.32	-1.08	0.28	346.32	0.92	1
hCG15615.3	143239	probe	155	125	1/ IVT	508.47	1.23	0.45	412.42	0.81	0
hCG15616.2	167384	probe	62	131	1/ IVT	9134.25	35.79	7.45	255.2	0.05	0
hCG15622.3	203961	probe	172	139	1/ IVT	1421.96	4.74	1.26	299.78	0.21	0
hCG15623.4	110417	probe	188	82	1/ IVT	13385.4	29.7	11.82	450.68	0.05	0
hCG15625.3	149014	probe	18	92	1/ IVT	10418.9	47.58	8.5	218.97	0.04	0
hCG15626.2	186730	probe	134	115	1/ IVT	14944.2	25.54	13.19	585.05	0.05	0
hCG15627.2	137897	probe	214	56	1/ IVT	4892.56	23.6	4.32	207.28	0.06	0
hCG15629.3	167847	probe	84	69	1/ IVT	48314.6	38.69	39.41	1248.92	0.04	0
hCG15630.3	112601	probe	174	122	1/ IVT	8065.93	28.05	7.12	287.53	0.05	0
hCG15635.2	118634	probe	211	61	1/ IVT	149.73	2.35	0.13	63.72	0.43	0
hCG15637.3	176241	probe	129	52	1/ IVT	702.96	8.12	0.62	86.54	0.13	0
hCG15638.2	101860	probe	101	25	1/ IVT	347.11	1.94	0.28	178.56	0.52	0
hCG15641.3	10480018	probe	66	53	1/ IVT	8835.52	29.38	7.21	300.77	0.05	0
hCG15642.3	205753	probe	11	12	1/ IVT	11964.8	11.32	9.76	1056.58	0.1	0
hCG15643.3	141516	probe	194	127	1/ IVT	23985.4	36.9	21.17	650.09	0.05	0
hCG15646.2	134065	probe	209	124	1/ IVT	35814.2	81.68	31.62	438.5	0.04	0
hCG15647.2	213218	probe	47	64	1/ IVT	188.93	-0.85	0.15	188.93	1.18	1
hCG15649.3	182853	probe	112	89	1/ IVT	14207	25.21	11.59	563.45	0.05	0
hCG15651.1	129859	probe	10	124	1/ IVT	12428.5	42.22	10.14	294.36	0.04	0
hCG15652.2	228316	probe	115	86	1/ IVT	75424.9	79.71	61.52	946.19	0.04	0
hCG15653.3	211988	probe	198	105	1/ IVT	20153.5	60.1	17.79	335.33	0.04	0
hCG15657.2	163121	probe	13	119	1/ IVT	30501.3	12.47	24.88	2445.91	0.09	0
hCG15662.3	130672	probe	83	118	1/ IVT	11618.5	46.86	9.48	247.93	0.04	0
hCG15665.2	208710	probe	73	29	1/ IVT	1748.45	18.1	1.43	96.61	0.07	0
hCG15668.2	174531	probe	101	39	1/ IVT	5778.81	22.54	4.71	256.42	0.06	0
hCG15669.4	163822	probe	104	65	1/ IVT	114.77	0	0.09	114.77	216.3	1
hCG15670.4	141679	probe	98	42	1/ IVT	34659.8	36.64	28.27	945.99	0.04	0
hCG15672.2	133721	probe	88	10	1/ IVT	1355.8	6.33	1.11	214.24	0.16	0
hCG15673.2	189219	probe	118	139	1/ IVT	20659	45.54	16.85	453.61	0.04	0
hCG15674.3	107357	probe	181	129	1/ IVT	7498.77	32.32	6.62	232.05	0.05	0
hCG15675.3	102661	probe	11	2	1/ IVT	15467.1	43.77	12.62	353.35	0.04	0
hCG15679.2	191770	probe	104	136	1/ IVT	1999.05	9.81	1.63	203.81	0.11	0
hCG15680.3	120144	probe	75	79	1/ IVT	21848.7	85.3	17.82	256.15	0.04	0
hCG15683.3	200201	probe	31	67	1/ IVT	1.51903e+06	92.76	1239	16375.6	0.04	4
hCG15683.3	159365	probe	203	114	1/ IVT	344586	94.5	304.2	3646.49	0.04	0
hCG15685.3	104625	probe	193	65	1/ IVT	1.0062e+06	133.43	888.27	7540.96	0.04	64
hCG15689.3	182906	probe	132	132	1/ IVT	2760.02	21.76	2.44	126.82	0.06	0
hCG15690.4	186922	probe	50	159	1/ IVT	8167.51	31.4	6.66	260.09	0.05	0
hCG15691.4	207468	probe	11	37	1/ IVT	45199	77.4	36.87	583.95	0.04	0
hCG15692.3	128484	probe	228	61	1/ IVT	161.18	4.72	0.14	34.18	0.22	0
hCG15693.3	190465	probe	81	153	1/ IVT	199.98	0.18	0.16	199.98	5.56	1
hCG15695.2	107201	probe	199	50	1/ IVT	10710.8	50.37	9.46	212.66	0.04	0
hCG15697.2	124730	probe	12	104	1/ IVT	13158	80.2	10.73	164.07	0.04	64
hCG15699.2	176259	probe	166	36	1/ IVT	2693.27	25.31	2.38	106.42	0.06	0
hCG15700.2	216296	probe	136	122	1/ IVT	10350.5	29.84	9.14	346.84	0.05	0
hCG15701.3	205038	probe	83	72	1/ IVT	208.31	-1.1	0.17	208.31	0.91	1
hCG15702.2	190918	probe	222	87	1/ IVT	39028.6	58.41	34.45	668.16	0.04	0
hCG15707.3	102403	probe	117	113	1/ IVT	11899.1	60.43	9.71	196.91	0.04	0
hCG15708.2	210317	probe	193	127	1/ IVT	17991	19.73	15.88	911.69	0.06	0
hCG15709.3	148762	probe	57	83	1/ IVT	1198.76	5.51	0.98	217.61	0.18	0
hCG15710.3	156494	probe	235	36	1/ IVT	10930.5	65.49	9.65	166.9	0.04	0
hCG15711.2	109358	probe	76	71	1/ IVT	500.01	1.02	0.41	488.86	0.98	0
hCG15712.4	202407	probe	57	59	1/ IVT	1199.25	7.21	0.98	166.41	0.14	0
hCG15718.2	166056	probe	201	84	1/ IVT	1243.15	7.12	1.1	174.5	0.15	0
hCG15719.4	236724	probe	107	77	1/ IVT	1.28357e+06	82.36	1046.95	15585.3	0.04	0
hCG15721.2	160679	probe	23	35	1/ IVT	5310.39	21.78	4.33	243.85	0.06	0
hCG15722.3	200736	probe	1	50	1/ IVT	1409.51	9.58	1.15	147.09	0.11	0
hCG15724.3	106282	probe	81	106	1/ IVT	3163.6	16.59	2.58	190.65	0.07	0
hCG15724.3	186980	probe	209	102	1/ IVT	2441.81	14.64	2.16	166.8	0.08	0
hCG15731.3	134635	probe	7	122	1/ IVT	107.22	0.67	0.09	107.22	1.49	1
hCG15737.2	106993	probe	155	12	1/ IVT	519.95	3.61	0.46	144.04	0.28	0
hCG15738.3	215613	probe	192	18	1/ IVT	7644.09	29.54	6.75	258.74	0.05	0
hCG15739.4	185900	probe	58	126	1/ IVT	1092.48	3.44	0.89	317.68	0.29	0
hCG15741.3	200666	probe	152	42	1/ IVT	808.34	7.65	0.71	105.61	0.14	0
hCG15743.2	170408	probe	196	135	1/ IVT	858.59	12.79	0.76	67.15	0.09	0
hCG15744.2	161347	probe	206	134	1/ IVT	130.36	1.13	0.12	115.21	0.88	0
hCG15745.3	209676	probe	107	131	1/ IVT	2829.01	10.27	2.31	275.58	0.1	0
hCG15747.3	104254	probe	172	155	1/ IVT	19791.5	74.3	17.47	266.36	0.04	0
hCG15749.2	175647	probe	150	38	1/ IVT	169052	98.78	149.24	1711.48	0.04	0
hCG15752.3	105450	probe	127	38	1/ IVT	247849	87.53	218.8	2831.72	0.04	0
hCG15753.2	198949	probe	164	10	1/ IVT	783.73	5.23	0.69	149.94	0.2	0
hCG15754.3	109802	probe	131	79	1/ IVT	49411.5	77.04	43.62	641.39	0.04	0
hCG15755.3	100547	probe	225	48	1/ IVT	499.68	4.09	0.44	122.09	0.25	0
hCG15756.2	169472	probe	43	66	1/ IVT	594.77	0.38	0.49	594.77	2.61	1
hCG15757.3	150425	probe	169	118	1/ IVT	19196.3	51.62	16.95	371.86	0.04	0
hCG15760.3	193211	probe	45	18	1/ IVT	113.14	-0.28	0.09	113.14	3.6	1
hCG15766.4	194412	probe	224	71	1/ IVT	31505.9	45.07	27.81	699.05	0.04	0
hCG15767.3	197310	probe	135	73	1/ IVT	44100.7	65.69	38.93	671.32	0.04	0
hCG15768.3	119689	probe	70	136	1/ IVT	2686.62	1.09	2.19	2459.49	0.92	0
hCG15769.2	214787	probe	37	151	1/ IVT	4084.37	18.13	3.33	225.24	0.07	0
hCG15771.3	142752	probe	132	11	1/ IVT	975.62	6.85	0.86	142.33	0.15	0
hCG15772.4	180244	probe	152	136	1/ IVT	470.1	5.31	0.42	88.52	0.19	0
hCG15774.3	115999	probe	59	151	1/ IVT	559.83	0.8	0.46	559.83	1.25	1
hCG15775.4	105260	probe	168	50	1/ IVT	39665.1	108.29	35.02	366.29	0.04	64
hCG15776.3	210785	probe	205	110	1/ IVT	204.73	3.05	0.18	67.03	0.33	0
hCG15777.4	143400	probe	113	121	1/ IVT	2568.18	20.71	2.09	123.99	0.06	0
hCG15778.4	167566	probe	23	103	1/ IVT	3521.52	16.89	2.87	208.44	0.07	0
hCG15780.3	133206	probe	175	93	1/ IVT	3001.76	18.73	2.65	160.23	0.07	0
hCG15781.3	217339	probe	12	111	1/ IVT	157464	91.3	128.44	1724.7	0.04	64
hCG15781.3	103877	probe	123	93	1/ IVT	98.39	-0.06	0.09	98.39	16.14	1
hCG15782.3	111340	probe	184	97	1/ IVT	648.84	3.22	0.57	201.27	0.31	0
hCG15783.4	207537	probe	81	4	1/ IVT	25680.3	28.93	20.95	887.67	0.05	0
hCG15784.2	121704	probe	124	74	1/ IVT	199.96	-2.15	0.18	199.96	0.47	1
hCG15785.3	214774	probe	78	65	1/ IVT	142965	91.45	116.61	1563.38	0.04	0
hCG15785.3	296275	probe	138	45	1/ IVT	196612	63.93	173.57	3075.27	0.04	0
hCG15785.3	189793	probe	233	68	1/ IVT	56172.2	60.12	49.59	934.28	0.04	0
hCG15786.3	210469	probe	45	1	1/ IVT	13164.7	31.82	10.74	413.75	0.05	0
hCG15790.2	112075	probe	166	1	1/ IVT	4645.83	35.93	4.1	129.29	0.05	0
hCG15791.3	192117	probe	158	155	1/ IVT	9557.05	41.55	8.44	230.03	0.05	0
hCG15792.3	129829	probe	109	153	1/ IVT	840.42	13.96	0.69	60.22	0.08	0
hCG15797.4	206731	probe	225	29	1/ IVT	97369	77.27	85.96	1260.18	0.04	0
hCG15798.2	222738	probe	174	13	1/ IVT	79.44	0.49	0.07	79.44	2.03	1
hCG15799.3	178520	probe	17	4	1/ IVT	2001.69	11.66	1.63	171.72	0.09	0
hCG15799.3	159563	probe	196	29	1/ IVT	15147.9	60.99	13.37	248.38	0.04	0
hCG15799.3	110512	probe	222	139	1/ IVT	5669.51	16.81	5.01	337.26	0.07	0
hCG15800.2	117649	probe	91	112	1/ IVT	290.97	2.29	0.24	126.93	0.44	0
hCG15804.3	702479	probe	224	121	1/ IVT	8641.76	32.04	7.63	269.7	0.05	0
hCG15807.2	167549	probe	66	99	1/ IVT	19206.3	42.14	15.67	455.76	0.04	0
hCG15814.3	182123	probe	36	118	1/ IVT	2131.7	8.69	1.74	245.22	0.12	0
hCG15814.3	227740	probe	144	15	1/ IVT	6000.4	36.7	5.3	163.51	0.05	0
hCG15818.3	132221	probe	86	66	1/ IVT	21607.8	39.54	17.62	546.47	0.04	0
hCG15820.3	105383	probe	214	2	1/ IVT	51728.9	51.14	45.67	1011.46	0.04	0
hCG15821.3	196301	probe	97	66	1/ IVT	467.17	2.21	0.38	211.54	0.45	0
hCG15822.2	138929	probe	228	143	1/ IVT	18178	35.44	16.05	512.88	0.05	0
hCG15829.4	105555	probe	66	59	1/ IVT	14242.5	66.67	11.62	213.63	0.04	0
hCG15830.2	123925	probe	123	45	1/ IVT	201.77	0.58	0.18	201.77	1.74	1
hCG15832.4	101692	probe	147	45	1/ IVT	145059	57.48	128.06	2523.8	0.04	0
hCG15833.2	219483	probe	181	147	1/ IVT	29400	54.26	25.95	541.8	0.04	0
hCG15834.3	173676	probe	136	106	1/ IVT	51715.6	80.59	45.65	641.69	0.04	0
hCG15837.2	180198	probe	56	87	1/ IVT	1085.89	8.09	0.89	134.15	0.13	0
hCG15844.3	179609	probe	50	157	1/ IVT	2609.71	9.35	2.13	279.24	0.11	0
hCG15845.3	193830	probe	9	12	1/ IVT	8532.73	6.35	6.96	1342.92	0.16	0
hCG15848.3	136572	probe	154	58	1/ IVT	7477.82	32.95	6.6	226.93	0.05	0
hCG15849.3	120981	probe	212	136	1/ IVT	139.75	0.13	0.12	139.75	7.68	1
hCG15850.3	203109	probe	113	44	1/ IVT	42572.3	81.85	34.72	520.12	0.04	0
hCG15851.3	134387	probe	216	2	1/ IVT	1493.63	2.52	1.32	593.32	0.4	0
hCG15852.4	218514	probe	74	59	1/ IVT	291.16	1.04	0.24	281.1	0.97	0
hCG15852.4	332119	probe	129	10	1/ IVT	68988.1	31.34	60.9	2201.32	0.05	0
hCG15854.3	264760	probe	36	1	1/ IVT	1871.37	18.97	1.53	98.64	0.06	0
hCG15857.3	204389	probe	222	14	1/ IVT	276.27	0.4	0.24	276.27	2.5	1
hCG15864.3	221107	probe	204	64	1/ IVT	2400.91	38.32	2.12	62.66	0.05	0
hCG15865.2	229341	probe	56	44	1/ IVT	35354.4	67.04	28.84	527.36	0.04	0
hCG15866.2	171786	probe	98	50	1/ IVT	38524	69.91	31.42	551.05	0.04	0
hCG15867.3	106963	probe	197	23	1/ IVT	23604.3	79.21	20.84	297.99	0.04	0
hCG15868.2	194079	probe	90	103	1/ IVT	12951.8	44.21	10.56	292.99	0.04	0
hCG15870.2	163352	probe	124	154	1/ IVT	449.82	1.79	0.4	251.24	0.56	0
hCG15871.3	148114	probe	205	106	1/ IVT	23837.4	75.18	21.04	317.07	0.04	0
hCG15872.3	215836	probe	183	46	1/ IVT	283.03	3.1	0.25	91.25	0.32	0
hCG15874.2	169049	probe	182	6	1/ IVT	2339.35	14.93	2.07	156.67	0.08	0
hCG15876.3	154792	probe	82	126	1/ IVT	317.29	-0.1	0.26	317.29	9.89	1
hCG15878.3	199643	probe	18	95	1/ IVT	15680.2	60.11	12.79	260.86	0.04	0
hCG15878.3	219323	probe	116	144	1/ IVT	125767	68.07	102.58	1847.49	0.04	0
hCG15879.3	191455	probe	38	159	1/ IVT	8035.29	36.99	6.55	217.25	0.04	0
hCG15880.5	189199	probe	156	93	1/ IVT	327312	71.51	288.95	4576.85	0.04	0
hCG15881.3	179073	probe	45	94	1/ IVT	5751.58	26.47	4.69	217.27	0.05	0
hCG15881.3	131480	probe	228	1	1/ IVT	8067.07	55.53	7.12	145.28	0.04	0
hCG15883.2	169001	probe	209	110	1/ IVT	473.27	-0.17	0.42	473.27	5.9	1
hCG15892.2	211949	probe	215	8	1/ IVT	500.61	3.76	0.44	132.98	0.27	0
hCG15893.2	213472	probe	119	53	1/ IVT	31602.2	62	25.78	509.67	0.04	0
hCG15894.3	129144	probe	151	96	1/ IVT	7883.54	37.75	6.96	208.81	0.05	64
hCG15901.3	218145	probe	104	39	1/ IVT	479.86	5.23	0.39	91.8	0.19	0
hCG15901.3	208606	probe	145	8	1/ IVT	4245.35	8.05	3.75	527.44	0.13	0
hCG15901.3	168722	probe	207	139	1/ IVT	421.29	2.08	0.37	202.68	0.48	0
hCG15902.3	188922	probe	196	65	1/ IVT	69459.8	111.62	61.32	622.28	0.04	64
hCG15912.4	162270	probe	177	69	1/ IVT	361.38	2.05	0.32	176.31	0.49	0
hCG15913.2	143980	probe	172	118	1/ IVT	252772	96.58	223.15	2617.15	0.04	0
hCG15914.3	118147	probe	221	152	1/ IVT	85038.1	38.62	75.07	2202.08	0.05	0
hCG15915.3	106454	probe	195	124	1/ IVT	31478.6	93.4	27.79	337.02	0.04	0
hCG15917.3	132666	probe	103	114	1/ IVT	104252	93.52	85.03	1114.76	0.04	0
hCG15918.3	151550	probe	111	8	1/ IVT	19895.2	32.72	16.23	608.09	0.05	0
hCG15919.3	150749	probe	145	151	1/ IVT	45477.5	74.81	40.15	607.89	0.04	0
hCG15922.2	105837	probe	194	55	1/ IVT	630.62	-0.3	0.56	630.62	3.33	1
hCG15923.2	140853	probe	53	59	1/ IVT	484570	64.9	395.24	7466.72	0.04	0
hCG15924.4	192931	probe	57	155	1/ IVT	793.11	0.23	0.65	793.11	4.35	1
hCG15926.3	185199	probe	76	29	1/ IVT	8754.1	37.86	7.14	231.2	0.04	0
hCG15927.3	167891	probe	67	108	1/ IVT	29807.7	81.29	24.31	366.66	0.04	0
hCG15927.3	104741	probe	146	142	1/ IVT	71296.6	68.03	62.94	1048.04	0.04	0
hCG15929.3	203338	probe	37	47	1/ IVT	543.64	0.32	0.44	543.64	3.09	1
hCG15935.2	146938	probe	129	145	1/ IVT	451.62	-0.37	0.4	451.62	2.67	1
hCG15937.2	231342	probe	183	114	1/ IVT	131057	104.23	115.7	1257.37	0.04	64
hCG15938.2	169837	probe	221	67	1/ IVT	109.12	-0.18	0.1	109.12	5.71	1
hCG15940.3	193667	probe	101	59	1/ IVT	1053.7	3.16	0.86	333.52	0.32	0
hCG15942.2	236734	probe	218	128	1/ IVT	445.57	3.79	0.39	117.54	0.27	0
hCG15952.3	183323	probe	201	17	1/ IVT	115.24	-0.36	0.1	115.24	2.8	1
hCG15953.3	107922	probe	122	64	1/ IVT	127.72	-1.73	0.11	127.72	0.58	1
hCG15954.4	160892	probe	15	155	1/ IVT	349.42	2.56	0.29	136.71	0.39	0
hCG15955.3	100570	probe	198	37	1/ IVT	10328.7	77.03	9.12	134.09	0.04	0
hCG15958.2	107070	probe	206	107	1/ IVT	9199.54	56.71	8.12	162.22	0.04	0
hCG15959.3	123461	probe	185	95	1/ IVT	119.65	-2.2	0.11	119.65	0.46	1
hCG15962.3	121941	probe	143	63	1/ IVT	1433.34	21.02	1.27	68.18	0.06	0
hCG15963.3	124944	probe	21	66	1/ IVT	1125.46	4.21	0.92	267.33	0.24	0
hCG15971.2	108971	probe	93	149	1/ IVT	32011.5	33.11	26.11	966.95	0.05	0
hCG15972.3	159351	probe	95	8	1/ IVT	80867.7	36.97	65.96	2187.2	0.04	0
hCG15972.3	162971	probe	175	136	1/ IVT	1038.49	8.45	0.92	122.96	0.12	0
hCG15972.3	220796	probe	193	147	1/ IVT	155626	90.17	137.39	1725.92	0.04	0
hCG15975.3	143014	probe	130	135	1/ IVT	48044.3	55.66	42.41	863.18	0.04	0
hCG15980.4	216486	probe	192	154	1/ IVT	4483.16	24.02	3.96	186.61	0.06	0
hCG15982.3	145093	probe	28	149	1/ IVT	148480	107.63	121.11	1379.57	0.04	64
hCG15982.3	201963	probe	126	125	1/ IVT	225481	52.38	199.05	4304.65	0.04	0
hCG15983.3	230968	probe	58	31	1/ IVT	153.43	-0.81	0.13	153.43	1.24	1
hCG15986.3	158140	probe	181	117	1/ IVT	232.02	2.25	0.2	103.15	0.45	0
hCG15987.3	156190	probe	214	132	1/ IVT	182.74	-2	0.16	182.74	0.5	1
hCG15988.3	220062	probe	75	56	1/ IVT	546.21	2.7	0.45	202.63	0.37	0
hCG15988.3	101666	probe	121	38	1/ IVT	190.39	1.15	0.17	164.85	0.87	0
hCG15988.3	118299	probe	159	122	1/ IVT	6256.64	37.21	5.52	168.12	0.05	0
hCG15990.3	160108	probe	1	44	1/ IVT	210.93	-0.04	0.17	210.93	27.69	1
hCG15990.3	113147	probe	130	1	1/ IVT	92.45	-1.34	0.08	92.45	0.75	1
hCG15992.3	124744	probe	57	34	1/ IVT	3020.26	7.25	2.46	416.4	0.14	0
hCG15993.3	142874	probe	234	18	1/ IVT	299.37	1.58	0.26	189.56	0.63	0
hCG15995.3	180577	probe	85	92	1/ IVT	21158.8	44.03	17.26	480.58	0.04	0
hCG15997.3	225077	probe	11	119	1/ IVT	15488.1	66.01	12.63	234.63	0.04	0
hCG15997.3	693712	probe	66	108	1/ IVT	410.37	2.31	0.33	177.51	0.43	0
hCG15997.3	146514	probe	212	88	1/ IVT	13894.2	16.95	12.27	819.66	0.07	0
hCG15998.2	225390	probe	190	110	1/ IVT	473.53	7.52	0.42	62.93	0.14	0
hCG15998.2	211713	probe	192	143	1/ IVT	44972.3	84.82	39.7	530.19	0.04	0
hCG15999.3	109410	probe	171	4	1/ IVT	289.14	-0.34	0.26	289.14	2.93	1
hCG16018.3	157338	probe	18	53	1/ IVT	514.23	-0.29	0.42	514.23	3.47	1
hCG16019.3	115770	probe	21	158	1/ IVT	1526.18	4.98	1.24	306.28	0.2	0
hCG16021.3	127127	probe	149	102	1/ IVT	683.39	6.99	0.6	97.71	0.15	0
hCG16022.3	227712	probe	145	84	1/ IVT	115.65	-0.4	0.1	115.65	2.51	1
hCG16022.3	151724	probe	189	44	1/ IVT	3670.08	6.53	3.24	561.9	0.16	0
hCG16023.3	170781	probe	39	153	1/ IVT	362208	102.43	295.44	3536.23	0.04	64
hCG16028.3	225251	probe	74	91	1/ IVT	157.8	0.24	0.13	157.8	4.1	1
hCG16029.3	214534	probe	93	1	1/ IVT	158.01	-0.23	0.13	158.01	4.31	1
hCG16030.2	186894	probe	4	35	1/ IVT	51766.2	98.61	42.22	524.93	0.04	64
hCG16031.2	210417	probe	99	24	1/ IVT	33370.3	47.72	27.22	699.37	0.04	0
hCG16031.2	218810	probe	191	132	1/ IVT	77.28	-0.06	0.07	77.28	15.84	1
hCG16033.3	106311	probe	48	9	1/ IVT	28119.5	57.25	22.94	491.17	0.04	0
hCG16043.2	226167	probe	195	87	1/ IVT	4832.75	21.75	4.27	222.18	0.06	0
hCG16045.4	192781	probe	175	151	1/ IVT	6235.98	30.56	5.51	204.06	0.05	0
hCG16047.2	122174	probe	166	82	1/ IVT	97.01	2.03	0.09	47.76	0.49	0
hCG16049.3	186772	probe	161	32	1/ IVT	19892	45.55	17.56	436.73	0.04	0
hCG16050.3	166549	probe	139	125	1/ IVT	88881.8	82.5	78.46	1077.36	0.04	0
hCG16053.3	129085	probe	176	46	1/ IVT	82.11	-2.48	0.07	82.11	0.4	1
hCG16055.3	149921	probe	214	148	1/ IVT	72.41	-3.98	0.06	72.41	0.25	131073
hCG16056.2	108674	probe	45	6	1/ IVT	159.5	-0.24	0.13	159.5	4.15	1
hCG16057.2	157979	probe	175	91	1/ IVT	36540	84.16	32.26	434.16	0.04	0
hCG16059.2	117210	probe	73	159	1/ IVT	20946.1	53.95	17.08	388.26	0.04	0
hCG16061.3	191167	probe	175	149	1/ IVT	936.18	-0.2	0.83	936.18	5.12	1
hCG16062.4	195131	probe	223	32	1/ IVT	1256.75	9.57	1.11	131.37	0.11	0
hCG16065.3	191994	probe	170	78	1/ IVT	419.19	2.88	0.37	145.57	0.35	0
hCG16067.2	194477	probe	66	49	1/ IVT	549.99	0.32	0.45	549.99	3.15	1
hCG16070.3	190934	probe	95	64	1/ IVT	662.89	3.44	0.54	192.88	0.29	0
hCG16072.3	139546	probe	95	110	1/ IVT	25866	58.65	21.1	441.03	0.04	0
hCG16074.3	155169	probe	47	63	1/ IVT	1005.26	6.2	0.82	162.04	0.17	0
hCG16076.4	170400	probe	70	51	1/ IVT	1.14461e+06	102.33	933.61	11185.9	0.04	0
hCG16077.3	206569	probe	159	88	1/ IVT	60226	53.03	53.17	1135.73	0.04	0
hCG16078.3	152164	probe	4	34	1/ IVT	6314.26	35.01	5.15	180.35	0.05	64
hCG16081.3	191554	probe	51	85	1/ IVT	2005.15	-0.43	1.64	2005.15	2.32	1
hCG16082.3	146111	probe	96	121	1/ IVT	1170.4	6.09	0.95	192.33	0.17	64
hCG16083.3	186112	probe	227	98	1/ IVT	12350.9	17.62	10.9	700.86	0.07	0
hCG16084.3	173972	probe	204	154	1/ IVT	55154	71.47	48.69	771.71	0.04	0
hCG16087.3	162475	probe	31	9	1/ IVT	33585.4	84.71	27.39	396.49	0.04	0
hCG16088.3	145338	probe	203	102	1/ IVT	1855.56	9.68	1.64	191.67	0.11	0
hCG16089.3	176082	probe	64	142	1/ IVT	43410.2	74.5	35.41	582.72	0.04	0
hCG16091.4	144159	probe	138	13	1/ IVT	38149.5	50.45	33.68	756.23	0.04	0
hCG16091.4	134841	probe	188	65	1/ IVT	4872.95	25.83	4.3	188.64	0.05	0
hCG16092.3	126212	probe	226	52	1/ IVT	14357.2	56.23	12.67	255.32	0.04	0
hCG16094.2	103212	probe	167	87	1/ IVT	437.8	3.08	0.39	141.93	0.33	0
hCG16097.3	157577	probe	97	74	1/ IVT	26916.9	47.6	21.95	565.47	0.04	0
hCG16102.2	134467	probe	75	51	1/ IVT	73121.2	90.08	59.64	811.74	0.04	0
hCG16103.2	185312	probe	7	157	1/ IVT	2490.09	4.23	2.03	588.79	0.24	0
hCG16105.2	138036	probe	141	111	1/ IVT	4574.28	23.25	4.04	196.71	0.06	0
hCG16109.3	470727	probe	158	23	1/ IVT	307042	84.7	271.06	3624.97	0.04	0
hCG16110.3	113632	probe	11	110	1/ IVT	344.59	0.33	0.28	344.59	2.99	1
hCG16114.3	105249	probe	134	36	1/ IVT	214.93	-1.21	0.19	214.93	0.83	1
hCG16115.2	173470	probe	31	103	1/ IVT	25244.9	76.31	20.59	330.83	0.04	0
hCG16116.3	214870	probe	9	70	1/ IVT	933.1	6.69	0.76	139.55	0.15	0
hCG16118.2	202586	probe	62	105	1/ IVT	122.92	0.73	0.1	122.92	1.36	1
hCG16120.2	194423	probe	93	151	1/ IVT	25228.2	21.58	20.58	1168.99	0.06	0
hCG16121.3	211309	probe	164	58	1/ IVT	42819.5	105.39	37.8	406.28	0.04	64
hCG16127.2	112545	probe	111	101	1/ IVT	621.12	2.98	0.51	208.47	0.34	0
hCG16129.2	138257	probe	81	47	1/ IVT	1302.77	6.68	1.06	194.94	0.15	0
hCG16131.3	186944	probe	36	15	1/ IVT	3526.74	16.9	2.88	208.67	0.07	0
hCG16134.3	217732	probe	3	35	1/ IVT	420.02	2.42	0.34	173.9	0.42	0
hCG16134.3	151125	probe	175	47	1/ IVT	662.88	3.52	0.59	188.14	0.29	0
hCG16137.3	188609	probe	237	46	1/ IVT	28681.6	64.95	25.32	441.58	0.04	0
hCG16138.3	134853	probe	22	83	1/ IVT	166.9	-0.16	0.14	166.9	6.43	1
hCG16139.3	216014	probe	94	67	1/ IVT	20212.6	46.73	16.49	432.56	0.04	0
hCG16142.2	188301	probe	228	38	1/ IVT	8802.74	49.9	7.77	176.42	0.04	0
hCG16144.2	196310	probe	177	98	1/ IVT	18192.4	77.36	16.06	235.16	0.04	0
hCG16147.3	186803	probe	122	25	1/ IVT	149.19	1	0.13	149.19	1	1
hCG16148.3	192339	probe	170	44	1/ IVT	707.04	4.77	0.62	148.17	0.21	0
hCG16149.3	113259	probe	212	41	1/ IVT	1787.29	16.81	1.58	106.31	0.07	0
hCG16150.2	179061	probe	162	95	1/ IVT	124.02	0.09	0.11	124.02	10.7	1
hCG16155.3	121156	probe	82	58	1/ IVT	399679	77.39	326	5164.57	0.04	0
hCG16157.2	157032	probe	108	136	1/ IVT	4701.31	22.08	3.83	212.91	0.06	0
hCG16161.3	162558	probe	185	117	1/ IVT	76798.1	101.9	67.8	753.66	0.04	0
hCG16162.3	201218	probe	44	157	1/ IVT	18289.4	34.73	14.92	526.65	0.05	0
hCG16163.3	122607	probe	15	35	1/ IVT	3787.78	24.71	3.09	153.29	0.05	0
hCG16163.3	211759	probe	91	142	1/ IVT	5885.25	22.2	4.8	265.09	0.06	0
hCG16164.3	217302	probe	59	77	1/ IVT	2908.48	4.97	2.37	584.75	0.2	0
hCG16164.3	132880	probe	174	133	1/ IVT	16131.5	34.06	14.24	473.59	0.05	0
hCG16165.3	199267	probe	74	84	1/ IVT	387.92	-0.29	0.32	387.92	3.5	1
hCG16166.2	236237	probe	187	4	1/ IVT	5653.47	23.14	4.99	244.27	0.06	0
hCG16167.2	151042	probe	145	136	1/ IVT	471.75	3.68	0.42	128.09	0.27	0
hCG16168.3	149935	probe	4	39	1/ IVT	674.9	6.84	0.55	98.68	0.15	0
hCG16169.2	152994	probe	114	99	1/ IVT	4253.38	28.65	3.47	148.48	0.05	0
hCG16170.3	112066	probe	89	5	1/ IVT	234530	29.46	191.3	7961.51	0.05	0
hCG16171.3	215161	probe	212	2	1/ IVT	7291.24	25.35	6.44	287.67	0.05	0
hCG16172.3	121301	probe	23	1	1/ IVT	27410.3	83.74	22.36	327.33	0.04	0
hCG16173.3	138016	probe	69	109	1/ IVT	5912.11	18.87	4.82	313.37	0.06	0
hCG16173.3	221216	probe	135	22	1/ IVT	3315.18	5.99	2.93	553.85	0.17	0
hCG16174.3	116466	probe	25	113	1/ IVT	130.04	1.3	0.11	100.25	0.77	0
hCG16175.3	146556	probe	51	56	1/ IVT	9070.96	42.08	7.4	215.56	0.04	0
hCG16176.3	159953	probe	229	22	1/ IVT	4133.84	39.85	3.65	103.74	0.05	0
hCG16177.2	184463	probe	141	110	1/ IVT	3134.9	14.54	2.77	215.67	0.08	0
hCG16178.3	511171	probe	234	84	1/ IVT	31470.8	105.13	27.78	299.35	0.04	0
hCG16179.4	236022	probe	155	156	1/ IVT	700958	87.63	618.81	7999.15	0.04	0
hCG16180.3	198631	probe	147	106	1/ IVT	3407.93	22.21	3.01	153.42	0.06	0
hCG16181.2	117527	probe	236	68	1/ IVT	13174.8	46.46	11.63	283.59	0.04	0
hCG16182.4	216535	probe	17	48	1/ IVT	44118.5	74.46	35.99	592.52	0.04	0
hCG16182.4	225336	probe	149	133	1/ IVT	848.27	8.55	0.75	99.21	0.12	0
hCG16186.3	129457	probe	201	47	1/ IVT	2425.76	14.81	2.14	163.74	0.08	0
hCG16187.2	153383	probe	169	36	1/ IVT	197.98	-0.53	0.17	197.98	1.9	1
hCG16190.4	136651	probe	70	125	1/ IVT	819.49	-0.65	0.67	819.49	1.53	1
hCG16205.3	204458	probe	177	44	1/ IVT	167.26	-0.76	0.15	167.26	1.32	1
hCG16206.3	207810	probe	146	94	1/ IVT	17411.6	58.04	15.37	300	0.04	0
hCG16207.3	237034	probe	196	109	1/ IVT	394.88	7.24	0.35	54.55	0.14	0
hCG16208.3	172292	probe	131	93	1/ IVT	6346.67	6.04	5.6	1049.95	0.17	0
hCG16209.3	111149	probe	155	91	1/ IVT	1.42285e+06	88.03	1256.09	16162.5	0.04	0
hCG16210.3	166581	probe	125	155	1/ IVT	1407.93	6.45	1.24	218.35	0.16	0
hCG16212.3	104936	probe	83	156	1/ IVT	521.06	-0.17	0.43	521.06	5.79	1
hCG16213.3	199789	probe	216	68	1/ IVT	1927.25	15.73	1.7	122.51	0.07	0
hCG16214.4	174841	probe	211	144	1/ IVT	3649.35	4.29	3.22	850.25	0.24	0
hCG16216.3	162178	probe	156	135	1/ IVT	4926.19	16.77	4.35	293.69	0.07	0
hCG16217.2	103297	probe	107	83	1/ IVT	161.5	-0.47	0.13	161.5	2.13	1
hCG16221.2	183205	probe	225	92	1/ IVT	1138.93	12.02	1.01	94.77	0.09	0
hCG16222.2	203530	probe	229	7	1/ IVT	2486.75	11.84	2.2	210.06	0.09	0
hCG16223.4	102972	probe	7	37	1/ IVT	2816.19	11.41	2.3	246.82	0.09	0
hCG16225.4	105646	probe	12	27	1/ IVT	14250	24.86	11.62	573.18	0.05	0
hCG16225.4	707897	probe	131	135	1/ IVT	501.55	0.31	0.44	501.55	3.28	1
hCG16229.1	140651	probe	106	52	1/ IVT	168.59	-0.39	0.14	168.59	2.6	1
hCG16230.3	157574	probe	155	57	1/ IVT	10016.1	43.4	8.84	230.76	0.04	0
hCG16231.4	136298	probe	9	90	1/ IVT	314.05	1.91	0.26	164.36	0.52	0
hCG16232.2	206612	probe	27	72	1/ IVT	341698	128.63	278.71	2656.42	0.04	64
hCG16233.3	181112	probe	127	75	1/ IVT	1769.54	12.15	1.56	145.69	0.09	0
hCG16234.2	185114	probe	187	58	1/ IVT	28941.3	53.54	25.55	540.59	0.04	0
hCG16236.3	143564	probe	108	112	1/ IVT	158.8	0.41	0.13	158.8	2.43	1
hCG16236.3	180927	probe	209	50	1/ IVT	93.6	-1.33	0.08	93.6	0.76	1
hCG16238.3	119211	probe	132	92	1/ IVT	2816.28	10.03	2.49	280.83	0.11	0
hCG16239.2	172673	probe	187	33	1/ IVT	894.1	8.98	0.79	99.59	0.12	0
hCG16240.3	209614	probe	209	127	1/ IVT	644.45	0.68	0.57	644.45	1.46	1
hCG16241.2	196639	probe	156	107	1/ IVT	1438.66	10.49	1.27	137.2	0.1	0
hCG16241.2	127917	probe	161	57	1/ IVT	103.07	-0.5	0.09	103.07	1.98	1
hCG16243.3	162874	probe	137	114	1/ IVT	402.66	2.75	0.36	146.48	0.37	0
hCG16244.2	167559	probe	33	97	1/ IVT	5408.16	24.94	4.41	216.84	0.05	0
hCG16245.3	185676	probe	156	137	1/ IVT	1072.62	10.21	0.95	105.07	0.11	0
hCG16247.2	119853	probe	191	143	1/ IVT	99.33	0.14	0.09	99.33	7.37	1
hCG16248.3	182815	probe	69	7	1/ IVT	4369.56	13.75	3.56	317.79	0.08	0
hCG16250.2	131558	probe	161	150	1/ IVT	15836.8	64.05	13.98	247.25	0.04	0
hCG16254.3	188337	probe	162	8	1/ IVT	237.78	1.98	0.21	120.04	0.51	0
hCG16256.3	201310	probe	56	150	1/ IVT	1560.64	0	1.27	1560.64	5440.62	1
hCG16258.3	223304	probe	232	72	1/ IVT	3495.53	14.7	3.09	237.75	0.08	0
hCG16259.3	114538	probe	123	13	1/ IVT	4767.66	17.26	4.21	276.26	0.07	0
hCG16259.3	219437	probe	173	130	1/ IVT	1647.8	11.78	1.45	139.92	0.09	0
hCG16260.3	192039	probe	94	14	1/ IVT	950.77	-1.06	0.78	950.77	0.95	1
hCG16261.3	190308	probe	23	152	1/ IVT	13883.8	47.37	11.32	293.07	0.04	0
hCG16261.3	190904	probe	98	132	1/ IVT	2299.8	6.23	1.88	369.34	0.16	0
hCG16262.3	164817	probe	164	76	1/ IVT	21934	58.38	19.36	375.69	0.04	0
hCG16263.2	130322	probe	29	82	1/ IVT	320.78	1.94	0.26	165.27	0.52	0
hCG16264.2	192638	probe	90	15	1/ IVT	19833.6	25.47	16.18	778.83	0.05	0
hCG16266.3	188332	probe	85	15	1/ IVT	3572.78	6.35	2.91	562.5	0.16	0
hCG16283.3	193551	probe	134	54	1/ IVT	176.36	-0.83	0.16	176.36	1.21	1
hCG16285.3	206016	probe	42	75	1/ IVT	163044	108.23	132.99	1506.52	0.04	0
hCG16286.2	236969	probe	76	74	1/ IVT	283.94	-1.28	0.23	283.94	0.78	1
hCG16289.3	114238	probe	84	33	1/ IVT	565.83	6.2	0.46	91.19	0.17	0
hCG16291.3	160942	probe	66	8	1/ IVT	259.4	3.12	0.21	83.01	0.32	0
hCG16292.3	206278	probe	71	48	1/ IVT	12623.7	36.63	10.3	344.67	0.04	0
hCG16293.2	141482	probe	123	112	1/ IVT	3614.94	22.14	3.19	163.26	0.06	0
hCG16294.2	166650	probe	178	118	1/ IVT	6537.97	40.13	5.77	162.93	0.05	0
hCG16295.2	157517	probe	198	81	1/ IVT	47306.2	36.93	41.76	1280.93	0.05	0
hCG16296.2	108501	probe	75	155	1/ IVT	5439.13	9.38	4.44	579.69	0.11	0
hCG16299.3	234681	probe	150	108	1/ IVT	859.26	7.57	0.76	113.53	0.14	0
hCG16299.3	191456	probe	187	10	1/ IVT	132.8	1.09	0.12	121.68	0.92	0
hCG16300.3	201831	probe	13	79	1/ IVT	18700.4	51.19	15.25	365.3	0.04	0
hCG16301.2	106325	probe	70	12	1/ IVT	842.61	1.25	0.69	673.44	0.8	0
hCG16301.2	165607	probe	164	6	1/ IVT	95.46	0.28	0.08	95.46	3.52	1
hCG16302.3	213826	probe	32	143	1/ IVT	7400.43	28.88	6.04	256.28	0.05	0
hCG16303.4	112346	probe	56	115	1/ IVT	8491.72	33.44	6.93	253.93	0.05	0
hCG16304.4	166305	probe	151	66	1/ IVT	1342.04	2	1.18	672.19	0.5	0
hCG16305.3	111014	probe	191	147	1/ IVT	2050.22	2.24	1.81	913.29	0.45	0
hCG16307.3	204044	probe	123	73	1/ IVT	206053	83.74	181.9	2460.57	0.04	0
hCG16308.4	152491	probe	54	79	1/ IVT	24822.8	83.93	20.25	295.74	0.04	0
hCG16311.3	180242	probe	6	45	1/ IVT	741.88	4.1	0.61	180.79	0.25	0
hCG16312.3	185129	probe	113	84	1/ IVT	2037.2	9.77	1.66	208.55	0.11	0
hCG16313.3	144715	probe	172	3	1/ IVT	33511.6	74.55	29.58	449.49	0.04	0
hCG16314.3	223193	probe	63	65	1/ IVT	6316.92	31.73	5.15	199.09	0.05	0
hCG16314.3	178415	probe	234	123	1/ IVT	396.95	2.46	0.35	161.35	0.41	0
hCG16315.2	187456	probe	72	119	1/ IVT	296.92	2.12	0.24	140.24	0.47	0
hCG16316.4	160222	probe	118	76	1/ IVT	147.08	-0.46	0.12	147.08	2.17	1
hCG16317.2	176983	probe	150	141	1/ IVT	61876.4	66.1	54.62	936.11	0.04	0
hCG16318.3	158286	probe	106	5	1/ IVT	198018	62.18	161.51	3184.69	0.04	0
hCG16319.2	180465	probe	211	56	1/ IVT	9253.71	40.52	8.17	228.36	0.05	0
hCG16320.2	693917	probe	36	134	1/ IVT	35390.4	62.71	28.87	564.37	0.04	0
hCG16320.2	679160	probe	222	16	1/ IVT	57477.7	76.6	50.74	750.36	0.04	0
hCG16321.4	177780	probe	186	28	1/ IVT	32.3	-2.61	0.03	32.3	0.39	1
hCG16322.3	104901	probe	105	28	1/ IVT	265188	58.7	216.3	4517.84	0.04	0
hCG16323.2	184797	probe	133	142	1/ IVT	8672.51	16.58	7.66	523.08	0.07	0
hCG16324.3	128833	probe	145	150	1/ IVT	106.54	1.04	0.09	102.25	0.96	0
hCG16325.4	173237	probe	46	142	1/ IVT	348.01	-0.16	0.28	348.01	6.19	1
hCG16326.3	192798	probe	34	13	1/ IVT	57100.6	99.71	46.57	572.65	0.04	0
hCG16330.3	127581	probe	31	139	1/ IVT	373432	93.69	304.59	3985.86	0.04	0
hCG16335.3	199474	probe	115	118	1/ IVT	414.49	-0.46	0.34	414.49	2.15	1
hCG16337.2	109836	probe	204	125	1/ IVT	705.12	-0.29	0.62	705.12	3.43	1
hCG16339.1	119363	probe	46	27	1/ IVT	140501	80.27	114.6	1750.42	0.04	0
hCG16340.2	236646	probe	99	145	1/ IVT	110888	41.89	90.45	2647.02	0.04	0
hCG16342.2	133397	probe	224	136	1/ IVT	5311.74	8.79	4.69	604.01	0.12	0
hCG16351.2	119012	probe	186	125	1/ IVT	7704.08	48.51	6.8	158.82	0.04	0
hCG16353.3	190410	probe	63	157	1/ IVT	4409.64	18.44	3.6	239.16	0.06	0
hCG16354.2	190612	probe	99	89	1/ IVT	50782.9	37.43	41.42	1356.88	0.04	0
hCG16354.2	235457	probe	153	125	1/ IVT	6266.12	21.54	5.53	290.9	0.06	0
hCG16355.4	160438	probe	231	99	1/ IVT	1706.05	8.88	1.51	192.14	0.12	0
hCG16356.4	135572	probe	22	124	1/ IVT	21935.5	62.43	17.89	351.37	0.04	0
hCG16356.4	224084	probe	115	8	1/ IVT	2019.78	7.57	1.65	266.92	0.14	0
hCG16357.3	182181	probe	196	116	1/ IVT	5637.03	19.48	4.98	289.37	0.06	0
hCG16358.3	171928	probe	16	129	1/ IVT	205.21	2.16	0.17	94.85	0.46	0
hCG16360.2	123143	probe	84	55	1/ IVT	439.64	2.04	0.36	215.29	0.49	0
hCG16361.2	173408	probe	183	154	1/ IVT	1150.41	7.47	1.02	153.91	0.14	0
hCG16362.1	192528	probe	235	56	1/ IVT	163.34	1.21	0.14	134.88	0.83	0
hCG16363.1	123749	probe	237	39	1/ IVT	148.26	0.96	0.13	148.26	1.04	1
hCG16364.3	188807	probe	135	5	1/ IVT	299.73	-0.14	0.26	299.73	7.13	1
hCG16365.2	163252	probe	56	68	1/ IVT	329.72	-0.98	0.27	329.72	1.02	1
hCG16366.3	177389	probe	187	84	1/ IVT	916.81	9.94	0.81	92.23	0.11	0
hCG16367.1	119357	probe	54	39	1/ IVT	290.53	1.99	0.24	145.97	0.5	0
hCG16368.2	149192	probe	215	48	1/ IVT	4389.65	11.29	3.88	388.89	0.1	0
hCG16369.3	227601	probe	61	43	1/ IVT	556.06	4.28	0.45	129.83	0.24	0
hCG16370.2	125982	probe	177	25	1/ IVT	2575.48	8.07	2.27	319.06	0.13	0
hCG16371.3	119072	probe	44	61	1/ IVT	188.06	0.6	0.15	188.06	1.68	1
hCG16372.3	176899	probe	58	145	1/ IVT	875.76	3.92	0.71	223.13	0.26	64
hCG16373.2	116792	probe	172	24	1/ IVT	83.95	-2.39	0.07	83.95	0.42	1
hCG16376.3	115455	probe	65	83	1/ IVT	794.41	5.62	0.65	141.34	0.18	0
hCG16376.3	114701	probe	133	66	1/ IVT	2277.65	7	2.01	325.32	0.15	0
hCG16377.3	152631	probe	54	96	1/ IVT	28605.6	59.13	23.33	483.77	0.04	0
hCG16377.3	225120	probe	123	6	1/ IVT	5709.25	27.99	5.04	203.95	0.05	0
hCG16378.3	120138	probe	25	91	1/ IVT	193.88	1.26	0.16	154.31	0.8	0
hCG16380.3	200578	probe	211	78	1/ IVT	1.30572e+06	66.66	1152.69	19586.8	0.04	0
hCG16381.1	132007	probe	138	106	1/ IVT	422.51	-0.15	0.37	422.51	6.52	1
hCG16382.2	118163	probe	225	58	1/ IVT	87.74	0.43	0.08	87.74	2.31	1
hCG16383.3	161608	probe	157	143	1/ IVT	220442	76.8	194.61	2870.18	0.04	0
hCG16384.2	170211	probe	238	10	1/ IVT	12032.9	39.01	10.62	308.45	0.05	0
hCG16386.3	158610	probe	101	65	1/ IVT	3093.55	11.85	2.52	260.96	0.09	0
hCG16387.3	169900	probe	178	87	1/ IVT	233.94	1.88	0.21	124.41	0.53	0
hCG16392.3	215308	probe	21	44	1/ IVT	793.99	3.04	0.65	261.28	0.33	0
hCG16393.2	231142	probe	33	91	1/ IVT	733.01	4.89	0.6	149.85	0.21	0
hCG16397.3	196924	probe	203	55	1/ IVT	106.74	-0.32	0.09	106.74	3.15	1
hCG1639742.3	189520	probe	104	51	1/ IVT	44593.8	84.57	36.37	527.3	0.04	0
hCG1639748.3	208956	probe	36	5	1/ IVT	148285	89.26	120.95	1661.36	0.04	64
hCG1639753.2	130046	probe	183	37	1/ IVT	147.89	-0.23	0.13	147.89	4.26	1
hCG1639758.3	198421	probe	157	91	1/ IVT	16256.3	33.58	14.35	484.07	0.05	0
hCG1639759.3	234150	probe	132	108	1/ IVT	286.37	1.55	0.25	185.13	0.65	0
hCG1639760.2	139804	probe	165	112	1/ IVT	119.22	-0.68	0.11	119.22	1.46	1
hCG1639761.3	236041	probe	194	16	1/ IVT	578784	41.49	510.95	13948.4	0.05	0
hCG1639762.4	181304	probe	178	68	1/ IVT	3855.54	24.03	3.4	160.48	0.06	0
hCG1639763.4	107124	probe	149	149	1/ IVT	686.22	-0.11	0.61	686.22	9.3	1
hCG1639764.3	166394	probe	25	15	1/ IVT	3784.67	11.55	3.09	327.72	0.09	0
hCG1639765.4	157489	probe	114	134	1/ IVT	27836	45.76	22.7	608.25	0.04	0
hCG1639774.3	213590	probe	156	11	1/ IVT	26503.6	62.91	23.4	421.3	0.04	0
hCG1639775.4	230460	probe	26	2	1/ IVT	1.28786e+06	108.61	1050.44	11857.9	0.04	0
hCG1639777.3	211363	probe	11	8	1/ IVT	1.35294e+06	75.6	1103.54	17895.1	0.04	0
hCG1639778.4	172176	probe	125	51	1/ IVT	587.34	0.91	0.52	587.34	1.1	1
hCG1639778.4	148153	probe	229	75	1/ IVT	83228.5	47.85	73.47	1739.21	0.04	0
hCG1639781.2	174785	probe	152	22	1/ IVT	134299	51.77	118.56	2594.38	0.04	0
hCG1639782.2	148927	probe	154	19	1/ IVT	14132	62.32	12.48	226.77	0.04	0
hCG1639794.4	102647	probe	126	132	1/ IVT	223.95	0.34	0.2	223.95	2.92	1
hCG1639795.3	142290	probe	212	22	1/ IVT	339131	69.09	299.38	4908.33	0.04	0
hCG1639800.3	188530	probe	167	8	1/ IVT	159320	55.18	140.65	2887.11	0.04	0
hCG1639801.2	105988	probe	43	56	1/ IVT	17282.5	51.87	14.1	333.19	0.04	0
hCG1639802.3	236688	probe	157	113	1/ IVT	863975	94.38	762.72	9153.8	0.04	0
hCG1639803.3	133993	probe	9	145	1/ IVT	1207.6	12.67	0.98	95.34	0.09	0
hCG1639804.2	166213	probe	231	61	1/ IVT	851.14	12.38	0.75	68.75	0.09	0
hCG1639805.4	192498	probe	81	32	1/ IVT	191.24	-0.52	0.16	191.24	1.92	1
hCG1639808.3	141912	probe	84	112	1/ IVT	7674.05	51.1	6.26	150.17	0.04	0
hCG1639813.3	230017	probe	73	50	1/ IVT	352.22	2.08	0.29	169.39	0.48	0
hCG1639814.3	153119	probe	22	5	1/ IVT	55970.7	81.87	45.65	683.63	0.04	0
hCG1639814.3	102388	probe	30	127	1/ IVT	5470.99	22.83	4.46	239.61	0.06	0
hCG1639814.3	140336	probe	103	128	1/ IVT	5409.31	22.76	4.41	237.63	0.06	0
hCG1639814.3	117532	probe	217	150	1/ IVT	7314.27	10.74	6.46	681.35	0.1	0
hCG1639815.3	236295	probe	99	159	1/ IVT	201453	48.09	164.32	4189.39	0.04	0
hCG1639816.4	215505	probe	124	15	1/ IVT	359.13	0.77	0.32	359.13	1.29	1
hCG1639823.3	183514	probe	194	156	1/ IVT	85.81	0.61	0.08	85.81	1.64	1
hCG1639824.4	191159	probe	96	68	1/ IVT	1290.74	1.49	1.05	864.06	0.67	0
hCG1639826.3	140541	probe	179	115	1/ IVT	105.44	-0.03	0.09	105.44	30.29	1
hCG1639829.3	175485	probe	98	34	1/ IVT	27949.1	52.77	22.8	529.68	0.04	0
hCG1639830.3	196106	probe	179	10	1/ IVT	576902	116.45	509.29	4954.27	0.04	0
hCG1639834.2	236772	probe	216	117	1/ IVT	816516	61.74	720.82	13225.8	0.04	0
hCG1639835.2	175043	probe	149	79	1/ IVT	1.07114e+06	92.64	945.6	11562.7	0.04	0
hCG1639837.1	161641	probe	156	67	1/ IVT	375.45	2.97	0.33	126.57	0.34	0
hCG1639840.3	138947	probe	63	121	1/ IVT	48794.8	77.81	39.8	627.09	0.04	0
hCG1639841.2	104400	probe	52	114	1/ IVT	42535.6	61.11	34.69	696.01	0.04	0
hCG1639844.2	106827	probe	182	68	1/ IVT	2528.54	19.04	2.23	132.82	0.07	0
hCG1639847.4	154657	probe	143	64	1/ IVT	128.56	0.93	0.11	128.56	1.08	1
hCG1639849.3	101814	probe	193	139	1/ IVT	163.51	0.44	0.14	163.51	2.3	1
hCG1639850.2	194586	probe	229	72	1/ IVT	126.04	-1.04	0.11	126.04	0.97	1
hCG1639851.3	231280	probe	124	23	1/ IVT	5740.49	25.4	5.07	225.99	0.05	0
hCG1639852.4	173717	probe	77	112	1/ IVT	405248	91.63	330.54	4422.83	0.04	0
hCG1639853.3	125060	probe	178	130	1/ IVT	178.25	-0.16	0.16	178.25	6.29	1
hCG1639854.3	172111	probe	16	9	1/ IVT	716.73	5.86	0.58	122.27	0.17	0
hCG1639856.4	236685	probe	64	96	1/ IVT	4793.46	11.49	3.91	417.2	0.09	0
hCG1639857.3	230745	probe	150	155	1/ IVT	222.77	-0.21	0.2	222.77	4.66	1
hCG1639858.2	178818	probe	51	58	1/ IVT	47765.7	73.96	38.96	645.86	0.04	0
hCG1639859.3	109498	probe	73	132	1/ IVT	232.73	1.6	0.19	145.83	0.63	0
hCG1639863.2	170669	probe	128	133	1/ IVT	145805	69.81	128.72	2088.65	0.04	0
hCG1639864.2	138062	probe	213	15	1/ IVT	132.58	-0.91	0.12	132.58	1.1	1
hCG1639865.3	174432	probe	67	66	1/ IVT	2424.3	12.53	1.98	193.53	0.09	0
hCG1639867.3	129325	probe	192	153	1/ IVT	165.16	0.98	0.15	165.16	1.02	1
hCG1639870.3	236666	probe	64	69	1/ IVT	1.31083e+06	83.43	1069.18	15712.5	0.04	4
hCG1639872.2	228458	probe	134	149	1/ IVT	92.95	-0.42	0.08	92.95	2.35	1
hCG1639874.3	134753	probe	182	52	1/ IVT	4181.13	10.85	3.69	385.18	0.1	0
hCG1639877.3	119116	probe	8	19	1/ IVT	51092.2	61.07	41.67	836.59	0.04	0
hCG1639877.3	218126	probe	47	89	1/ IVT	98820.6	60.47	80.6	1634.23	0.04	0
hCG1639877.3	187532	probe	228	155	1/ IVT	213695	36.2	188.65	5902.96	0.05	0
hCG1639884.4	234461	probe	227	42	1/ IVT	355192	80.87	313.56	4392.23	0.04	0
hCG1639886.3	704559	probe	103	145	1/ IVT	136.23	-0.96	0.11	136.23	1.04	1
hCG1639889.2	115598	probe	102	129	1/ IVT	178.86	-0.86	0.15	178.86	1.16	1
hCG1639889.2	173149	probe	170	16	1/ IVT	182.45	0.48	0.16	182.45	2.09	1
hCG1639891.4	110507	probe	63	151	1/ IVT	212204	64.15	173.09	3307.93	0.04	0
hCG1639895.2	129246	probe	223	93	1/ IVT	409110	105.64	361.16	3872.73	0.04	0
hCG16399.3	168210	probe	17	35	1/ IVT	17638.4	67.23	14.39	262.36	0.04	0
hCG16399.3	235086	probe	24	81	1/ IVT	432.46	3.59	0.35	120.51	0.28	0
hCG16399.3	113948	probe	165	126	1/ IVT	97.74	-0.22	0.09	97.74	4.56	1
hCG1639904.4	179797	probe	150	117	1/ IVT	15725.3	52.38	13.88	300.22	0.04	0
hCG1639905.3	196635	probe	4	12	1/ IVT	365.67	3.9	0.3	93.66	0.26	0
hCG1639908.3	230868	probe	127	62	1/ IVT	67852.2	25.28	59.9	2684.14	0.06	0
hCG1639909.4	208764	probe	199	86	1/ IVT	29829.7	32.14	26.33	928.25	0.05	0
hCG1639912.3	203443	probe	38	93	1/ IVT	2807.78	20.19	2.29	139.07	0.06	0
hCG1639915.3	153248	probe	130	112	1/ IVT	18430.5	44.15	16.27	417.41	0.04	0
hCG1639921.3	230930	probe	72	59	1/ IVT	2930.47	13.99	2.39	209.47	0.08	0
hCG1639925.3	121459	probe	234	88	1/ IVT	6899.23	42.38	6.09	162.78	0.04	0
hCG1639927.2	197479	probe	83	131	1/ IVT	1543.23	5.05	1.26	305.82	0.2	0
hCG1639935.2	146600	probe	121	54	1/ IVT	730390	46.24	644.79	15796.2	0.04	0
hCG1639936.4	142040	probe	128	122	1/ IVT	6013.43	24.15	5.31	249.05	0.06	0
hCG1639937.3	228181	probe	117	37	1/ IVT	3207.53	11.18	2.62	286.83	0.1	0
hCG1639941.3	195075	probe	97	97	1/ IVT	519.18	3.03	0.42	171.45	0.33	0
hCG1639943.3	177201	probe	158	91	1/ IVT	4489.01	17.68	3.96	253.88	0.07	0
hCG1639947.2	209694	probe	111	64	1/ IVT	2739.43	19.73	2.23	138.83	0.06	0
hCG1639951.4	114661	probe	63	158	1/ IVT	8599.31	46.63	7.01	184.43	0.04	0
hCG1639952.3	182686	probe	206	91	1/ IVT	137.03	-1.44	0.12	137.03	0.7	1
hCG1639958.2	102835	probe	73	139	1/ IVT	560.35	3.06	0.46	183.4	0.33	0
hCG1639958.2	170722	probe	108	148	1/ IVT	45393.7	46.39	37.03	978.49	0.04	0
hCG1639960.4	147635	probe	30	24	1/ IVT	349.37	2.24	0.28	156.08	0.45	0
hCG1639963.3	209342	probe	184	95	1/ IVT	22131.3	45.32	19.54	488.36	0.04	0
hCG1639965.3	173159	probe	142	66	1/ IVT	144187	63.66	127.29	2264.98	0.04	0
hCG1639967.3	209040	probe	97	8	1/ IVT	3022.46	9.66	2.47	313.02	0.11	0
hCG1639969.4	236811	probe	223	123	1/ IVT	172274	53.11	152.08	3243.68	0.04	0
hCG1639973.3	228252	probe	185	35	1/ IVT	87.09	-0.3	0.08	87.09	3.36	1
hCG1639976.2	132306	probe	91	155	1/ IVT	301.01	-1.48	0.25	301.01	0.68	1
hCG1639985.5	191106	probe	77	16	1/ IVT	112201	52.11	91.52	2153.08	0.04	0
hCG1639989.3	154130	probe	119	74	1/ IVT	92.45	-1.58	0.08	92.45	0.63	1
hCG1639991.1	185838	probe	195	53	1/ IVT	536.21	6.37	0.47	84.15	0.16	0
hCG1639994.3	202350	probe	72	81	1/ IVT	138777	62.08	113.19	2235.52	0.04	0
hCG1640000.4	107682	probe	158	141	1/ IVT	58731.7	38.94	51.85	1508.29	0.05	0
hCG1640002.3	232940	probe	35	130	1/ IVT	164.46	-0.41	0.13	164.46	2.43	1
hCG1640003.3	163595	probe	11	118	1/ IVT	525.96	0.29	0.43	525.96	3.48	1
hCG1640011.2	210030	probe	30	41	1/ IVT	19572.3	45.57	15.96	429.47	0.04	0
hCG1640012.3	236834	probe	79	64	1/ IVT	5826.13	24.44	4.75	238.4	0.05	0
hCG1640013.4	211059	probe	130	147	1/ IVT	554.23	3.79	0.49	146.37	0.27	0
hCG1640013.4	191061	probe	144	35	1/ IVT	192993	85.65	170.37	2253.25	0.04	0
hCG1640013.4	111793	probe	155	143	1/ IVT	345.09	-0.6	0.3	345.09	1.66	1
hCG1640014.3	198384	probe	107	2	1/ IVT	12665	23.46	10.33	539.79	0.06	0
hCG1640018.3	167621	probe	227	108	1/ IVT	55371.7	79.92	48.88	692.87	0.04	0
hCG1640025.4	106063	probe	79	144	1/ IVT	550.85	1.08	0.45	511.95	0.93	0
hCG1640027.3	236365	probe	187	111	1/ IVT	43837.9	80.74	38.7	542.98	0.04	0
hCG1640036.4	118278	probe	12	41	1/ IVT	19433.5	37.37	15.85	519.99	0.04	0
hCG1640042.3	166111	probe	6	132	1/ IVT	1555.23	10.36	1.27	150.18	0.1	0
hCG1640045.3	176065	probe	229	14	1/ IVT	12136.5	16.95	10.71	715.86	0.07	0
hCG1640047.3	139703	probe	205	119	1/ IVT	10976.9	42.6	9.69	257.67	0.04	0
hCG1640052.2	162615	probe	37	111	1/ IVT	294327	80.68	240.07	3648.01	0.04	0
hCG1640053.3	193415	probe	113	150	1/ IVT	415.25	-1.35	0.34	415.25	0.74	1
hCG1640057.3	129598	probe	225	150	1/ IVT	131.15	-0.22	0.12	131.15	4.46	1
hCG1640060.2	176986	probe	69	75	1/ IVT	445.93	2.73	0.36	163.08	0.37	0
hCG1640061.1	120119	probe	113	156	1/ IVT	11173.9	34.84	9.11	320.69	0.05	0
hCG1640065.3	202391	probe	115	47	1/ IVT	162.74	0.56	0.13	162.74	1.79	1
hCG1640067.4	212151	probe	174	56	1/ IVT	4119.88	26.38	3.64	156.2	0.05	0
hCG1640068.3	207168	probe	16	19	1/ IVT	2520.23	16.83	2.06	149.79	0.07	0
hCG1640068.3	184902	probe	25	41	1/ IVT	332.37	0.46	0.27	332.37	2.17	1
hCG1640069.2	230241	probe	216	156	1/ IVT	5106.49	29.89	4.51	170.82	0.05	0
hCG1640071.3	185920	probe	53	119	1/ IVT	143.43	-0.47	0.12	143.43	2.14	1
hCG1640072.3	104237	probe	97	134	1/ IVT	16824.4	49.62	13.72	339.05	0.04	0
hCG1640075.3	236782	probe	5	147	1/ IVT	19626	66.92	16.01	293.27	0.04	0
hCG1640077.3	151956	probe	189	63	1/ IVT	2064.31	28.06	1.82	73.56	0.05	0
hCG1640092.2	183555	probe	151	69	1/ IVT	64350.2	98.25	56.81	654.93	0.04	0
hCG1640093.2	125050	probe	73	42	1/ IVT	36879.2	74.15	30.08	497.37	0.04	0
hCG1640093.2	165349	probe	234	127	1/ IVT	3817	20.9	3.37	182.63	0.06	0
hCG1640095.3	116310	probe	164	143	1/ IVT	452.06	3.44	0.4	131.23	0.29	0
hCG1640096.3	232399	probe	92	146	1/ IVT	2648.07	18.16	2.16	145.8	0.07	0
hCG1640098.1	159383	probe	22	36	1/ IVT	31612.7	46.44	25.79	680.69	0.04	0
hCG16401.4	108594	probe	44	84	1/ IVT	77307.5	82.67	63.06	935.15	0.04	0
hCG1640102.3	117549	probe	58	26	1/ IVT	199.67	-0.77	0.16	199.67	1.29	1
hCG1640106.3	158959	probe	88	47	1/ IVT	143.76	0.17	0.12	143.76	5.81	1
hCG1640107.4	236292	probe	39	14	1/ IVT	9929.86	45.55	8.1	217.98	0.04	0
hCG1640108.2	236414	probe	15	157	1/ IVT	13075.8	45.33	10.67	288.49	0.04	0
hCG1640109.5	135636	probe	162	105	1/ IVT	189989	72.99	167.72	2603.03	0.04	0
hCG1640115.4	236049	probe	119	142	1/ IVT	332760	56.24	271.42	5916.65	0.04	0
hCG1640117.2	236507	probe	196	16	1/ IVT	834062	25.16	736.31	33149.5	0.06	0
hCG1640120.3	212953	probe	167	7	1/ IVT	3627.26	7.43	3.2	487.93	0.14	0
hCG1640126.3	134555	probe	151	87	1/ IVT	513941	68.88	453.71	7461.37	0.04	0
hCG1640127.4	164694	probe	150	122	1/ IVT	29148.5	68.58	25.73	425.04	0.04	0
hCG1640128.4	236704	probe	34	45	1/ IVT	27707.9	58.43	22.6	474.18	0.04	0
hCG1640129.2	317016	probe	77	131	1/ IVT	15619.6	79.12	12.74	197.43	0.04	64
hCG1640135.3	198472	probe	184	70	1/ IVT	83082.9	105.86	73.35	784.81	0.04	0
hCG1640137.2	180014	probe	214	32	1/ IVT	373806	66.49	330	5622.39	0.04	0
hCG1640139.4	214065	probe	184	32	1/ IVT	187.57	-1.25	0.17	187.57	0.8	1
hCG1640142.2	144432	probe	12	67	1/ IVT	1043.37	6.97	0.85	149.69	0.15	0
hCG1640143.3	138666	probe	225	88	1/ IVT	117.87	1.3	0.1	91.01	0.77	0
hCG1640151.4	708204	probe	50	10	1/ IVT	269.88	1.76	0.22	153.45	0.57	0
hCG1640151.4	201377	probe	77	92	1/ IVT	5679.22	32.19	4.63	176.41	0.05	0
hCG1640153.3	101039	probe	75	107	1/ IVT	19870	69.52	16.21	285.82	0.04	0
hCG1640160.3	178869	probe	210	103	1/ IVT	13517.7	38.63	11.93	349.97	0.05	0
hCG1640162.3	136226	probe	91	90	1/ IVT	13501.8	29.22	11.01	462.08	0.05	0
hCG1640164.2	257484	probe	215	121	1/ IVT	297.82	-0.05	0.26	297.82	20.58	1
hCG1640167.4	169951	probe	88	144	1/ IVT	1.50172e+06	33.12	1224.88	45339.3	0.05	4
hCG1640167.4	172896	probe	138	30	1/ IVT	1.6658e+06	52.41	1470.56	31784.3	0.04	0
hCG1640167.4	162103	probe	212	94	1/ IVT	1.96839e+06	61.45	1737.69	32030.1	0.04	4
hCG1640168.4	168582	probe	238	65	1/ IVT	414.94	1.42	0.37	292.01	0.7	0
hCG1640169.4	164735	probe	59	13	1/ IVT	19270.7	17.79	15.72	1083.33	0.07	0
hCG1640170.3	124083	probe	37	145	1/ IVT	650467	109.98	530.56	5914.23	0.04	64
hCG1640173.4	165595	probe	134	69	1/ IVT	1.36329e+06	90.11	1203.51	15128.9	0.04	0
hCG1640174.3	110745	probe	164	154	1/ IVT	845649	85.96	746.54	9837.24	0.04	0
hCG1640178.3	175806	probe	4	98	1/ IVT	6688.36	18.38	5.46	363.94	0.07	0
hCG1640179.3	193509	probe	146	153	1/ IVT	3930.85	24.06	3.47	163.4	0.06	0
hCG1640180.3	206172	probe	11	41	1/ IVT	6993.8	22.31	5.7	313.51	0.06	0
hCG1640181.3	186068	probe	54	97	1/ IVT	4609.72	14.47	3.76	318.59	0.08	0
hCG1640184.3	151134	probe	18	62	1/ IVT	19453.3	35.27	15.87	551.63	0.05	0
hCG1640185.2	143414	probe	23	66	1/ IVT	2708.8	12.77	2.21	212.05	0.09	0
hCG1640186.3	143996	probe	93	17	1/ IVT	382.5	-1.16	0.31	382.5	0.87	1
hCG1640192.3	105900	probe	135	74	1/ IVT	21488	29.35	18.97	732.02	0.05	0
hCG1640193.2	177346	probe	16	12	1/ IVT	287.66	-0.65	0.23	287.66	1.53	1
hCG1640195.4	229147	probe	157	50	1/ IVT	4915.24	23.38	4.34	210.19	0.06	0
hCG16402.2	116004	probe	24	4	1/ IVT	24135.3	99.5	19.69	242.57	0.04	64
hCG1640203.1	101962	probe	137	132	1/ IVT	843.02	9.12	0.74	92.43	0.12	0
hCG1640204.3	196405	probe	75	37	1/ IVT	19001.9	57.44	15.5	330.83	0.04	0
hCG1640206.2	167659	probe	199	114	1/ IVT	456.93	4.92	0.4	92.94	0.21	0
hCG1640214.4	135137	probe	58	154	1/ IVT	509.14	0.53	0.42	509.14	1.9	1
hCG1640214.4	145154	probe	72	114	1/ IVT	24195.5	86.01	19.74	281.3	0.04	0
hCG1640216.2	216793	probe	9	24	1/ IVT	82.33	-3.03	0.07	82.33	0.33	131073
hCG1640219.2	228665	probe	34	121	1/ IVT	277.95	0.49	0.23	277.95	2.05	1
hCG1640221.2	115127	probe	195	154	1/ IVT	6994.03	66.54	6.17	105.12	0.04	0
hCG1640224.3	232839	probe	104	133	1/ IVT	2747.55	15.26	2.24	180.03	0.07	0
hCG1640225.5	165754	probe	108	89	1/ IVT	331.37	1.09	0.27	305.11	0.92	0
hCG1640228.3	208122	probe	84	151	1/ IVT	424170	54.55	345.98	7775.56	0.04	0
hCG1640229.2	182432	probe	175	111	1/ IVT	1577.47	11.08	1.39	142.42	0.1	0
hCG1640230.2	137388	probe	27	128	1/ IVT	10501.4	8.67	8.57	1210.6	0.12	0
hCG1640234.4	185546	probe	235	154	1/ IVT	24673.2	39.91	21.78	618.17	0.05	0
hCG1640242.2	172553	probe	88	106	1/ IVT	817.18	1.31	0.67	625.58	0.77	0
hCG1640242.2	103703	probe	204	15	1/ IVT	7541.96	43.91	6.66	171.75	0.04	0
hCG1640247.3	236563	probe	173	32	1/ IVT	17849.4	62.66	15.76	284.88	0.04	0
hCG1640251.4	228101	probe	217	70	1/ IVT	1908.82	16.38	1.69	116.5	0.07	0
hCG1640255.3	223165	probe	219	108	1/ IVT	435.74	-0.22	0.38	435.74	4.64	1
hCG1640265.1	161418	probe	222	82	1/ IVT	379120	107.96	334.69	3511.81	0.04	0
hCG1640272.3	179608	probe	129	146	1/ IVT	12812	36.93	11.31	346.94	0.05	0
hCG1640273.3	168047	probe	139	68	1/ IVT	220.8	1.76	0.19	125.12	0.57	0
hCG1640275.3	180602	probe	65	59	1/ IVT	4917.57	20.47	4.01	240.21	0.06	0
hCG1640280.3	136300	probe	25	94	1/ IVT	4930.78	16.35	4.02	301.55	0.07	0
hCG1640280.3	163372	probe	225	146	1/ IVT	92.9	-0.6	0.08	92.9	1.67	1
hCG1640282.3	142074	probe	176	151	1/ IVT	632198	107.94	558.1	5856.75	0.04	64
hCG1640288.2	114691	probe	231	66	1/ IVT	187.79	1.9	0.17	98.59	0.53	0
hCG1640289.5	181598	probe	153	147	1/ IVT	2.1426e+06	78.37	1891.49	27338.5	0.04	4
hCG1640290.3	140231	probe	44	81	1/ IVT	243.14	1.07	0.2	226.66	0.93	0
hCG1640291.2	187871	probe	185	119	1/ IVT	36083.5	84.07	31.85	429.22	0.04	0
hCG1640293.1	177496	probe	96	17	1/ IVT	506.45	-0.53	0.41	506.45	1.9	1
hCG1640296.3	230384	probe	64	49	1/ IVT	27540.8	49.43	22.46	557.15	0.04	0
hCG1640298.2	181362	probe	97	7	1/ IVT	9743.33	24.93	7.95	390.84	0.05	0
hCG1640299.3	177625	probe	22	34	1/ IVT	465.56	3.5	0.38	133.2	0.29	0
hCG1640300.3	155962	probe	76	47	1/ IVT	393.12	1.67	0.32	235.14	0.6	0
hCG1640304.3	165370	probe	31	66	1/ IVT	279943	69.66	228.34	4018.98	0.04	0
hCG1640307.3	186589	probe	174	150	1/ IVT	9035.82	56.94	7.98	158.68	0.04	0
hCG1640313.3	101403	probe	202	35	1/ IVT	132.45	0.02	0.12	132.45	47.84	1
hCG1640315.2	148804	probe	191	61	1/ IVT	899.67	5.77	0.79	155.79	0.18	0
hCG1640319.2	145025	probe	5	93	1/ IVT	351.99	2.22	0.29	158.87	0.45	0
hCG1640325.2	119762	probe	116	137	1/ IVT	198.92	0.37	0.16	198.92	2.71	1
hCG1640327.4	236396	probe	95	132	1/ IVT	13186.2	18.6	10.76	708.82	0.06	0
hCG1640328.4	221686	probe	9	83	1/ IVT	192.86	1.26	0.16	153.3	0.8	0
hCG1640329.4	124334	probe	238	29	1/ IVT	279.39	0.78	0.25	279.39	1.28	1
hCG1640331.3	201584	probe	164	141	1/ IVT	388.83	3.13	0.34	124.26	0.32	64
hCG1640332.3	234596	probe	114	42	1/ IVT	658.85	3.63	0.54	181.28	0.28	0
hCG1640337.4	191433	probe	181	26	1/ IVT	129153	71.15	114.02	1815.3	0.04	0
hCG1640339.1	170405	probe	52	27	1/ IVT	1872.07	-0.67	1.53	1872.07	1.49	1
hCG1640341.3	147519	probe	225	62	1/ IVT	317.64	2.02	0.28	157.25	0.5	0
hCG1640344.3	193773	probe	119	91	1/ IVT	70.84	0.07	0.06	70.84	15.29	1
hCG1640346.4	130983	probe	34	103	1/ IVT	1256.58	-1.07	1.02	1256.58	0.94	1
hCG1640349.4	713500	probe	148	69	1/ IVT	125.8	0.39	0.11	125.8	2.53	1
hCG1640359.3	167552	probe	225	109	1/ IVT	265.02	0.18	0.23	265.02	5.67	1
hCG1640360.4	236634	probe	64	82	1/ IVT	16239.9	12.6	13.25	1288.58	0.09	0
hCG1640364.3	233899	probe	37	94	1/ IVT	166.4	0.78	0.14	166.4	1.29	1
hCG1640369.4	218065	probe	132	121	1/ IVT	232.67	-0.01	0.21	232.67	96.13	1
hCG1640369.4	128812	probe	175	104	1/ IVT	12204.2	51.2	10.77	238.39	0.04	0
hCG1640370.5	148160	probe	34	114	1/ IVT	424457	89.46	346.21	4744.64	0.04	0
hCG1640375.3	194328	probe	205	107	1/ IVT	205.79	0.97	0.18	205.79	1.03	1
hCG1640375.3	183904	probe	230	78	1/ IVT	2359.59	11.76	2.08	200.62	0.09	0
hCG1640376.3	328080	probe	62	85	1/ IVT	5586.49	7.16	4.56	780.4	0.14	0
hCG1640378.3	236725	probe	151	146	1/ IVT	1549.73	8.62	1.37	179.78	0.12	0
hCG1640379.3	103678	probe	62	12	1/ IVT	3750.6	16.89	3.06	222.08	0.07	0
hCG1640387.2	162340	probe	235	6	1/ IVT	90.96	-0.67	0.08	90.96	1.5	1
hCG1640390.2	122051	probe	98	11	1/ IVT	29798.1	24.2	24.3	1231.36	0.05	0
hCG1640393.4	111318	probe	130	45	1/ IVT	42425.8	41.18	37.45	1030.3	0.05	0
hCG1640396.3	10712347	probe	210	72	1/ IVT	615.36	4.07	0.54	151.13	0.25	0
hCG16404.2	120701	probe	7	127	1/ IVT	9572.77	35.92	7.81	266.47	0.05	0
hCG1640404.3	112235	probe	48	158	1/ IVT	193.97	1.33	0.16	145.96	0.75	0
hCG1640406.3	122823	probe	197	35	1/ IVT	63094.8	81.23	55.7	776.74	0.04	0
hCG1640408.3	198106	probe	38	110	1/ IVT	80702.7	80.67	65.83	1000.42	0.04	0
hCG1640408.3	219949	probe	116	24	1/ IVT	1457.34	30.5	1.19	47.78	0.05	0
hCG1640410.3	186250	probe	42	106	1/ IVT	1312.63	3.21	1.07	409.26	0.31	0
hCG1640414.2	174717	probe	52	110	1/ IVT	141.29	-0.89	0.12	141.29	1.12	1
hCG1640415.3	109024	probe	105	37	1/ IVT	537971	70.37	438.8	7644.62	0.04	0
hCG1640416.3	131502	probe	111	125	1/ IVT	531.84	-0.71	0.43	531.84	1.4	1
hCG1640416.3	713561	probe	194	96	1/ IVT	1036.17	2.72	0.91	381.51	0.37	0
hCG1640418.3	487291	probe	175	155	1/ IVT	1303.34	4.54	1.15	287.01	0.22	0
hCG1640430.3	185343	probe	21	70	1/ IVT	1251.38	26.36	1.02	47.48	0.05	0
hCG1640438.2	158533	probe	194	94	1/ IVT	612.38	5.31	0.54	115.32	0.19	0
hCG1640439.4	214093	probe	172	59	1/ IVT	20544.9	64.18	18.14	320.14	0.04	0
hCG1640439.4	206951	probe	228	121	1/ IVT	42379.7	73.12	37.41	579.56	0.04	0
hCG1640443.3	131410	probe	174	14	1/ IVT	920.72	6.45	0.81	142.75	0.16	0
hCG1640445.2	143499	probe	218	57	1/ IVT	336.35	-0.34	0.3	336.35	2.91	1
hCG1640446.3	272562	probe	109	111	1/ IVT	363.11	1.61	0.3	225.17	0.62	0
hCG1640447.4	183458	probe	137	156	1/ IVT	6216.6	54.45	5.49	114.17	0.04	0
hCG1640448.3	200366	probe	1	138	1/ IVT	5428.31	20.11	4.43	269.98	0.06	0
hCG1640448.3	217625	probe	88	97	1/ IVT	789.03	1.09	0.64	725.4	0.92	0
hCG1640448.3	235942	probe	236	45	1/ IVT	775.02	7.42	0.68	104.44	0.14	0
hCG1640449.3	158974	probe	204	38	1/ IVT	5043.8	27.67	4.45	182.25	0.05	0
hCG1640452.2	133807	probe	93	143	1/ IVT	510.87	5.88	0.42	86.82	0.17	0
hCG1640453.1	106111	probe	108	99	1/ IVT	561183	78.65	457.73	7135.46	0.04	0
hCG1640454.2	147811	probe	191	4	1/ IVT	1731.88	-0.7	1.53	1731.88	1.42	1
hCG1640456.2	236367	probe	103	110	1/ IVT	448.12	2.83	0.37	158.53	0.36	0
hCG1640457.4	224206	probe	48	58	1/ IVT	195.62	0.08	0.16	195.62	12.97	1
hCG1640458.3	148152	probe	215	102	1/ IVT	796.88	8.7	0.7	91.63	0.12	0
hCG1640462.3	198737	probe	181	144	1/ IVT	95546.1	82.57	84.35	1157.17	0.04	0
hCG1640463.3	122554	probe	188	47	1/ IVT	30939.4	32.22	27.31	960.39	0.05	0
hCG1640464.3	225617	probe	216	109	1/ IVT	442.63	2.45	0.39	180.51	0.41	0
hCG1640465.2	193947	probe	205	63	1/ IVT	24149	66.87	21.32	361.14	0.04	0
hCG1640466.1	174536	probe	172	52	1/ IVT	19129.9	27.08	16.89	706.34	0.05	0
hCG1640467.3	179147	probe	26	75	1/ IVT	2211.97	1.32	1.8	1676.32	0.76	0
hCG1640468.2	126600	probe	232	102	1/ IVT	3059.12	19.8	2.7	154.5	0.06	0
hCG1640477.2	137708	probe	133	154	1/ IVT	1.02045e+06	87.59	900.85	11650.4	0.04	0
hCG1640483.3	148940	probe	223	79	1/ IVT	6516.32	26.24	5.75	248.3	0.05	0
hCG1640484.2	148420	probe	112	19	1/ IVT	41042.7	63.65	33.48	644.86	0.04	0
hCG1640484.2	468490	probe	208	52	1/ IVT	671.88	-0.09	0.59	671.88	10.61	1
hCG1640485.1	206232	probe	74	94	1/ IVT	7345.56	30.3	5.99	242.46	0.05	0
hCG1640486.2	150786	probe	58	2	1/ IVT	1.64567e+06	52.67	1342.3	31242.9	0.04	0
hCG1640487.3	111742	probe	117	48	1/ IVT	9902.81	49.05	8.08	201.89	0.04	0
hCG1640490.3	105011	probe	6	138	1/ IVT	597.19	6.49	0.49	92.04	0.16	0
hCG1640491.4	136906	probe	207	48	1/ IVT	19517.6	40.4	17.23	483.15	0.05	0
hCG1640493.3	125158	probe	114	123	1/ IVT	228.5	-1.39	0.19	228.5	0.72	1
hCG1640498.3	177124	probe	1	125	1/ IVT	9352.45	50.2	7.63	186.31	0.04	0
hCG1640498.3	184691	probe	226	132	1/ IVT	5729.73	54.4	5.06	105.32	0.04	0
hCG1640499.4	179267	probe	154	56	1/ IVT	137.01	-1.32	0.12	137.01	0.76	1
hCG16405.2	148925	probe	132	70	1/ IVT	1.57603e+06	62.53	1391.32	25204.8	0.04	0
hCG1640501.2	234116	probe	225	102	1/ IVT	4933.59	58.4	4.36	84.47	0.04	0
hCG1640505.3	215957	probe	188	102	1/ IVT	85160.6	81.29	75.18	1047.6	0.04	0
hCG1640511.3	203033	probe	202	34	1/ IVT	2428.14	11.29	2.14	215.02	0.1	0
hCG1640512.2	236233	probe	237	145	1/ IVT	1812.77	11.98	1.6	151.34	0.09	0
hCG1640514.2	188500	probe	77	52	1/ IVT	6585.51	17.62	5.37	373.78	0.07	0
hCG1640515.3	175604	probe	132	135	1/ IVT	197.29	-2.32	0.17	197.29	0.43	1
hCG1640519.3	107658	probe	83	47	1/ IVT	146.97	-1.42	0.12	146.97	0.71	1
hCG1640519.3	122466	probe	119	92	1/ IVT	173.96	0.31	0.14	173.96	3.21	1
hCG1640521.2	189732	probe	61	107	1/ IVT	3629.01	30.7	2.96	118.22	0.05	0
hCG1640529.2	201248	probe	77	147	1/ IVT	118.07	0.56	0.1	118.07	1.79	1
hCG1640530.3	104166	probe	222	8	1/ IVT	516	4.11	0.46	125.48	0.25	0
hCG1640531.4	188867	probe	226	35	1/ IVT	134.7	0.65	0.12	134.7	1.54	1
hCG1640532.2	211604	probe	24	128	1/ IVT	290941	111.86	237.31	2600.98	0.04	0
hCG1640533.2	162661	probe	79	112	1/ IVT	156.15	-0.22	0.13	156.15	4.58	1
hCG1640534.2	135546	probe	194	115	1/ IVT	3249.61	13.31	2.87	244.06	0.08	0
hCG1640535.2	170685	probe	54	102	1/ IVT	325.74	2.44	0.27	133.47	0.41	0
hCG1640542.2	118072	probe	6	39	1/ IVT	130.37	0.48	0.11	130.37	2.1	1
hCG1640549.4	231963	probe	69	59	1/ IVT	162.79	0.89	0.13	162.79	1.12	1
hCG1640553.2	205924	probe	44	35	1/ IVT	257.12	0.43	0.21	257.12	2.33	1
hCG1640554.3	122523	probe	6	121	1/ IVT	12179.3	49.58	9.93	245.66	0.04	0
hCG1640558.3	130634	probe	111	9	1/ IVT	17431.8	53.8	14.22	324.03	0.04	0
hCG1640559.3	117064	probe	216	72	1/ IVT	2293.85	10.03	2.03	228.75	0.11	0
hCG1640565.3	221844	probe	87	127	1/ IVT	279.59	0.1	0.23	279.59	9.85	1
hCG1640567.4	206344	probe	10	36	1/ IVT	7059.69	23.63	5.76	298.81	0.06	0
hCG1640571.3	236714	probe	34	118	1/ IVT	476370	97.1	388.55	4906.07	0.04	0
hCG1640575.3	122010	probe	69	58	1/ IVT	7153.64	57.24	5.83	124.97	0.04	0
hCG1640577.2	189195	probe	10	48	1/ IVT	177.43	2.62	0.14	67.67	0.38	0
hCG1640577.2	236974	probe	48	107	1/ IVT	28735.2	59.45	23.44	483.33	0.04	0
hCG1640577.2	134341	probe	124	121	1/ IVT	57.53	1.17	0.05	49.33	0.86	0
hCG1640578.4	168479	probe	52	113	1/ IVT	94290.4	76.65	76.91	1230.08	0.04	0
hCG1640580.3	232393	probe	226	146	1/ IVT	2690.94	9.82	2.38	273.96	0.11	0
hCG1640591.2	180971	probe	47	6	1/ IVT	8249.5	15.85	6.73	520.41	0.07	0
hCG1640593.3	146072	probe	205	108	1/ IVT	109.79	0.85	0.1	109.79	1.18	1
hCG1640599.3	229405	probe	99	146	1/ IVT	483.45	-1.27	0.39	483.45	0.79	1
hCG16406.2	105499	probe	15	123	1/ IVT	689.88	3.53	0.56	195.69	0.29	0
hCG1640601.3	702154	probe	31	13	1/ IVT	28474.1	46.93	23.22	606.75	0.04	0
hCG1640606.3	207047	probe	108	9	1/ IVT	2399.26	17.51	1.96	137.04	0.07	0
hCG1640609.1	136794	probe	82	2	1/ IVT	275.75	0.42	0.22	275.75	2.37	1
hCG1640609.1	145167	probe	208	134	1/ IVT	1600.28	4.09	1.41	390.96	0.25	0
hCG1640610.3	127636	probe	96	5	1/ IVT	177879	45.85	145.09	3879.88	0.04	0
hCG1640612.3	174736	probe	142	10	1/ IVT	12969.1	30.04	11.45	431.8	0.05	0
hCG1640613.2	197622	probe	105	111	1/ IVT	1820.13	10.28	1.48	177.05	0.1	0
hCG1640619.3	236094	probe	158	74	1/ IVT	46117.2	56.68	40.71	813.69	0.04	0
hCG1640620.3	217202	probe	14	111	1/ IVT	6059.04	52.28	4.94	115.89	0.04	0
hCG1640622.3	196451	probe	149	107	1/ IVT	1378.76	10.9	1.22	126.5	0.1	64
hCG1640624.3	110960	probe	195	33	1/ IVT	19325	73.39	17.06	263.32	0.04	0
hCG1640625.3	209734	probe	134	63	1/ IVT	390.04	2.72	0.34	143.46	0.37	0
hCG1640626.3	179010	probe	187	21	1/ IVT	6863.35	26.78	6.06	256.29	0.05	0
hCG1640627.4	192143	probe	98	150	1/ IVT	776.1	6.78	0.63	114.51	0.15	0
hCG1640628.3	151155	probe	6	72	1/ IVT	301.26	0.99	0.25	301.26	1.01	1
hCG1640630.2	149363	probe	171	82	1/ IVT	1765.74	13.3	1.56	132.78	0.08	0
hCG1640632.3	116913	probe	90	14	1/ IVT	1229.21	1.59	1	771.18	0.63	0
hCG1640634.3	200280	probe	226	130	1/ IVT	21337	47.69	18.84	447.42	0.04	0
hCG1640635.4	154434	probe	55	63	1/ IVT	6136.32	10.6	5.01	579.02	0.1	0
hCG1640636.2	233307	probe	56	19	1/ IVT	256	-1.63	0.21	256	0.62	1
hCG1640638.3	233301	probe	95	21	1/ IVT	449.12	2.15	0.37	208.53	0.47	0
hCG1640644.3	110136	probe	136	43	1/ IVT	844.46	-0.52	0.75	844.46	1.93	1
hCG1640645.2	190449	probe	75	66	1/ IVT	347.34	-0.09	0.28	347.34	11.44	1
hCG1640653.2	176377	probe	170	125	1/ IVT	139.76	0.55	0.12	139.76	1.81	1
hCG1640654.3	106160	probe	18	126	1/ IVT	134.54	0.28	0.11	134.54	3.56	1
hCG1640659.3	236892	probe	106	119	1/ IVT	1516.03	5.6	1.24	270.81	0.18	0
hCG1640663.3	232526	probe	164	114	1/ IVT	612.47	3.62	0.54	169.2	0.28	0
hCG1640668.4	225047	probe	186	126	1/ IVT	19015.8	36.48	16.79	521.23	0.05	0
hCG1640673.3	199931	probe	131	33	1/ IVT	168.11	-0.88	0.15	168.11	1.14	1
hCG1640677.2	154501	probe	183	115	1/ IVT	33923.4	64.88	29.95	522.9	0.04	0
hCG1640678.4	231283	probe	202	103	1/ IVT	868375	66.69	766.6	13020.2	0.04	0
hCG1640683.3	174706	probe	28	42	1/ IVT	152.55	1.17	0.12	130.28	0.85	0
hCG1640686.3	104615	probe	69	74	1/ IVT	325.2	3.18	0.27	102.29	0.32	0
hCG1640692.3	138834	probe	28	56	1/ IVT	752024	54.45	613.39	13812.5	0.04	0
hCG1640696.1	216287	probe	164	45	1/ IVT	6601.73	58.16	5.83	113.51	0.04	0
hCG1640698.3	108394	probe	227	81	1/ IVT	80.18	0.7	0.07	80.18	1.44	1
hCG1640699.5	216992	probe	69	64	1/ IVT	3495.46	3.86	2.85	906.41	0.26	0
hCG16407.3	170759	probe	143	45	1/ IVT	169.14	0.24	0.15	169.14	4.21	1
hCG1640700.3	157169	probe	73	118	1/ IVT	303.92	0.38	0.25	303.92	2.65	1
hCG1640702.3	213822	probe	17	76	1/ IVT	843.42	1.69	0.69	497.75	0.59	0
hCG1640707.3	196004	probe	157	83	1/ IVT	2238.46	2.65	1.98	844.63	0.38	0
hCG1640708.1	114390	probe	198	61	1/ IVT	23799.5	81.79	21.01	290.98	0.04	0
hCG1640714.3	233439	probe	73	94	1/ IVT	1625.17	11.3	1.33	143.82	0.1	0
hCG1640719.3	230555	probe	204	53	1/ IVT	99.56	-1.12	0.09	99.56	0.89	1
hCG1640725.2	162845	probe	195	83	1/ IVT	5831.01	23.89	5.15	244.1	0.06	0
hCG1640726.3	124552	probe	147	61	1/ IVT	5094.1	42.06	4.5	121.12	0.05	0
hCG1640727.2	159991	probe	205	25	1/ IVT	2977.94	36.47	2.63	81.65	0.05	0
hCG1640727.2	186013	probe	236	54	1/ IVT	4945.05	25.52	4.37	193.81	0.05	0
hCG1640728.2	184839	probe	63	50	1/ IVT	55924.3	68.15	45.61	820.62	0.04	0
hCG1640730.3	528807	probe	46	37	1/ IVT	501.98	1.58	0.41	316.72	0.63	0
hCG1640736.2	205276	probe	53	98	1/ IVT	623.11	2.92	0.51	213.74	0.34	0
hCG1640737.3	139192	probe	216	1	1/ IVT	246.16	-0.98	0.22	246.16	1.02	1
hCG1640741.3	230222	probe	117	87	1/ IVT	285.6	1	0.23	285.6	1	1
hCG1640748.1	108678	probe	174	45	1/ IVT	115333	98.27	101.82	1173.63	0.04	0
hCG1640750.3	116621	probe	171	64	1/ IVT	26712.4	72.82	23.58	366.82	0.04	0
hCG1640751.2	116829	probe	203	7	1/ IVT	93093.2	32.73	82.18	2844.58	0.05	0
hCG1640754.3	236413	probe	189	135	1/ IVT	1.19129e+06	82.26	1051.67	14481.4	0.04	0
hCG1640756.3	134269	probe	72	130	1/ IVT	18245.5	80.96	14.88	225.37	0.04	64
hCG1640757.3	199775	probe	112	146	1/ IVT	3232.99	18.28	2.64	176.84	0.07	0
hCG1640761.4	203190	probe	37	149	1/ IVT	60350.5	95.51	49.23	631.86	0.04	0
hCG1640762.3	123127	probe	2	19	1/ IVT	12063.9	69.2	9.84	174.32	0.04	0
hCG1640764.1	132736	probe	136	105	1/ IVT	42011.6	95.66	37.09	439.18	0.04	0
hCG1640765.2	183644	probe	27	106	1/ IVT	437032	95.18	356.47	4591.41	0.04	0
hCG1640770.3	142358	probe	138	109	1/ IVT	616.68	2.91	0.54	211.88	0.35	0
hCG1640777.2	190331	probe	171	96	1/ IVT	4024.89	14.59	3.55	275.77	0.08	0
hCG1640779.4	110900	probe	41	87	1/ IVT	103.95	0.4	0.08	103.95	2.52	1
hCG1640784.3	232351	probe	90	58	1/ IVT	175.91	0.28	0.14	175.91	3.58	1
hCG1640785.2	393133	probe	27	143	1/ IVT	224247	92	182.91	2437.54	0.04	0
hCG1640791.3	188699	probe	105	99	1/ IVT	238.48	-1.18	0.19	238.48	0.85	1
hCG1640792.3	228049	probe	35	46	1/ IVT	169.34	-1.14	0.14	169.34	0.88	1
hCG1640793.4	107344	probe	132	17	1/ IVT	107950	37.71	95.3	2862.88	0.05	0
hCG1640794.3	162490	probe	174	101	1/ IVT	723174	96.35	638.42	7505.52	0.04	0
hCG1640796.3	135904	probe	116	78	1/ IVT	32208.7	76.1	26.27	423.26	0.04	0
hCG16408.4	179130	probe	79	29	1/ IVT	15334.4	49.27	12.51	311.22	0.04	0
hCG1640800.4	229724	probe	127	28	1/ IVT	52857.6	79.34	46.66	666.2	0.04	0
hCG1640802.3	102627	probe	1	65	1/ IVT	9365.11	51.62	7.64	181.42	0.04	0
hCG1640805.3	193078	probe	28	27	1/ IVT	42366.2	91.43	34.56	463.38	0.04	0
hCG1640809.3	215343	probe	61	103	1/ IVT	37325.8	85.68	30.44	435.66	0.04	0
hCG1640814.4	226128	probe	97	23	1/ IVT	90.99	0.31	0.07	90.99	3.2	1
hCG1640814.4	122477	probe	103	82	1/ IVT	120.68	-1.28	0.1	120.68	0.78	1
hCG1640820.2	119063	probe	22	25	1/ IVT	99900.2	62.77	81.48	1591.57	0.04	0
hCG1640822.3	110205	probe	88	6	1/ IVT	243330	46.53	198.47	5229.09	0.04	0
hCG1640822.3	122241	probe	98	57	1/ IVT	194344	74.11	158.52	2622.32	0.04	0
hCG1640823.2	166471	probe	62	153	1/ IVT	4223.13	13.5	3.44	312.89	0.08	0
hCG1640825.3	108454	probe	118	74	1/ IVT	5468.79	20.45	4.46	267.47	0.06	0
hCG1640827.4	214045	probe	144	32	1/ IVT	5641.72	17.32	4.98	325.7	0.07	0
hCG1640831.2	203258	probe	57	79	1/ IVT	1154.36	4.84	0.94	238.54	0.21	0
hCG1640833.3	102564	probe	201	38	1/ IVT	12599.7	40.62	11.12	310.17	0.05	0
hCG1640834.3	645710	probe	85	65	1/ IVT	687065	48.3	560.41	14225.4	0.04	0
hCG1640837.4	202399	probe	5	61	1/ IVT	181454	70.85	148	2561.2	0.04	0
hCG1640838.3	155355	probe	132	16	1/ IVT	390.32	-1.23	0.34	390.32	0.81	1
hCG1640838.3	136923	probe	236	132	1/ IVT	359.2	-1.18	0.32	359.2	0.85	1
hCG1640839.4	229386	probe	206	128	1/ IVT	255953	44.46	225.96	5756.37	0.04	0
hCG1640844.3	108623	probe	182	4	1/ IVT	233.92	-1.62	0.21	233.92	0.62	1
hCG1640847.3	113912	probe	6	52	1/ IVT	240.52	1.88	0.2	128.02	0.53	0
hCG1640850.3	236117	probe	74	62	1/ IVT	151029	83.93	123.19	1799.48	0.04	0
hCG1640852.3	126445	probe	24	154	1/ IVT	68.64	-0.41	0.06	68.64	2.46	1
hCG1640854.3	234362	probe	3	145	1/ IVT	153.25	-0.71	0.13	153.25	1.41	1
hCG1640855.2	208312	probe	176	138	1/ IVT	357250	110.18	315.38	3242.43	0.04	64
hCG1640859.3	708660	probe	89	21	1/ IVT	978.72	2.22	0.8	441.28	0.45	0
hCG1640867.2	183721	probe	51	115	1/ IVT	12420.6	30.67	10.13	404.95	0.05	0
hCG1640867.2	129664	probe	188	135	1/ IVT	1762.52	1.5	1.56	1177.32	0.67	0
hCG1640869.3	536277	probe	75	113	1/ IVT	279.27	0.69	0.23	279.27	1.46	1
hCG1640871.4	151440	probe	46	137	1/ IVT	34625.4	45.61	28.24	759.15	0.04	0
hCG1640873.2	115606	probe	95	124	1/ IVT	998435	74.72	814.38	13362.7	0.04	0
hCG1640874.3	207786	probe	3	126	1/ IVT	199.32	0.77	0.16	199.32	1.29	1
hCG1640875.2	100687	probe	223	134	1/ IVT	191.37	1.55	0.17	123.59	0.65	0
hCG1640876.3	194752	probe	229	73	1/ IVT	282.42	-2.03	0.25	282.42	0.49	1
hCG1640877.3	152955	probe	157	148	1/ IVT	409.43	1.8	0.36	228.07	0.56	0
hCG1640878.3	184443	probe	142	136	1/ IVT	57792.8	65.97	51.02	876.07	0.04	0
hCG1640879.4	212295	probe	227	158	1/ IVT	2073.37	16.89	1.83	122.75	0.07	0
hCG1640885.4	177204	probe	153	116	1/ IVT	17066.1	73.87	15.07	231.03	0.04	0
hCG1640891.3	139103	probe	132	118	1/ IVT	1535.64	12.41	1.36	123.73	0.09	0
hCG1640892.3	139791	probe	5	75	1/ IVT	4797.22	11.85	3.91	404.67	0.09	0
hCG1640895.3	165901	probe	141	15	1/ IVT	25508.8	38	22.52	671.37	0.05	0
hCG16409.3	135851	probe	222	105	1/ IVT	477.85	-0.3	0.42	477.85	3.31	1
hCG1640903.4	181162	probe	159	15	1/ IVT	18825.9	8.24	16.62	2285.59	0.13	0
hCG1640912.3	193239	probe	87	102	1/ IVT	286646	82.76	233.8	3463.6	0.04	0
hCG1640914.2	145919	probe	156	8	1/ IVT	277.32	2.14	0.24	129.34	0.47	0
hCG1640915.4	160495	probe	1	72	1/ IVT	85364.8	41.22	69.63	2071.15	0.04	0
hCG1640921.3	162191	probe	134	116	1/ IVT	178.58	-0.77	0.16	178.58	1.3	1
hCG1640923.2	216937	probe	112	17	1/ IVT	1051.98	7.81	0.86	134.7	0.13	64
hCG1640924.2	190926	probe	55	46	1/ IVT	131.33	0.32	0.11	131.33	3.09	1
hCG1640925.5	160897	probe	59	146	1/ IVT	21761.9	63.47	17.75	342.89	0.04	0
hCG1640926.3	114122	probe	43	45	1/ IVT	76538.7	98.73	62.43	775.26	0.04	0
hCG1640926.3	119484	probe	174	127	1/ IVT	83681.3	93.78	73.87	892.28	0.04	0
hCG1640928.3	155654	probe	193	133	1/ IVT	499.75	1.83	0.44	273.41	0.55	0
hCG1640930.3	211072	probe	39	35	1/ IVT	399.04	0.7	0.33	399.04	1.43	1
hCG1640931.2	189433	probe	192	149	1/ IVT	4107.95	2.38	3.63	1728.02	0.42	0
hCG1640935.3	228354	probe	34	150	1/ IVT	3957.58	29.25	3.23	135.32	0.05	0
hCG1640936.3	104454	probe	144	139	1/ IVT	1029.44	0.5	0.91	1029.44	1.99	1
hCG1640945.3	200962	probe	182	73	1/ IVT	852.43	10	0.75	85.22	0.11	0
hCG1640948.2	122674	probe	65	30	1/ IVT	581.28	16.85	0.47	34.49	0.07	0
hCG1640949.2	125714	probe	224	76	1/ IVT	232.79	1.06	0.21	220.38	0.95	0
hCG1640952.4	101065	probe	106	87	1/ IVT	69559.2	83.78	56.74	830.24	0.04	0
hCG1640953.2	228134	probe	227	7	1/ IVT	114484	77.61	101.07	1475.05	0.04	0
hCG1640954.3	197090	probe	51	125	1/ IVT	2381.19	8.51	1.94	279.94	0.12	0
hCG1640960.5	134064	probe	25	55	1/ IVT	4351.5	25.2	3.55	172.7	0.05	0
hCG1640964.2	114854	probe	235	54	1/ IVT	3575.94	24.15	3.16	148.1	0.06	0
hCG1640966.2	164822	probe	172	46	1/ IVT	47831.6	58.61	42.23	816.13	0.04	0
hCG1640970.3	137654	probe	81	149	1/ IVT	31706.2	45.44	25.86	697.77	0.04	0
hCG1640970.3	207499	probe	224	103	1/ IVT	34528.8	89.81	30.48	384.45	0.04	0
hCG1640974.3	228045	probe	8	38	1/ IVT	349888	91.84	285.39	3809.91	0.04	64
hCG1640978.4	210362	probe	66	113	1/ IVT	1.46139e+06	96.26	1191.99	15181.8	0.04	4
hCG1640980.4	194637	probe	132	19	1/ IVT	59083.1	28.52	52.16	2071.43	0.05	0
hCG1640981.4	222445	probe	179	108	1/ IVT	3527.42	10.22	3.11	345.01	0.11	0
hCG1640982.2	229225	probe	161	7	1/ IVT	131.38	0.02	0.12	131.38	51.22	1
hCG1640983.2	160263	probe	107	107	1/ IVT	36968.4	41.26	30.15	896.06	0.04	0
hCG1640984.1	119320	probe	42	62	1/ IVT	3178.09	14.28	2.59	222.51	0.08	0
hCG1640985.1	223459	probe	79	74	1/ IVT	13689.6	53.44	11.17	256.16	0.04	0
hCG1640986.3	195742	probe	49	46	1/ IVT	418.77	-0.58	0.34	418.77	1.73	1
hCG1640999.4	140559	probe	172	35	1/ IVT	40.39	-4.26	0.04	40.39	0.24	131073
hCG16410.2	129999	probe	14	45	1/ IVT	13065.2	26.43	10.66	494.25	0.05	0
hCG1641001.4	108672	probe	218	8	1/ IVT	129.92	-0.14	0.11	129.92	6.99	1
hCG1641003.3	190354	probe	108	4	1/ IVT	2146.01	1.04	1.75	2055.08	0.96	0
hCG1641004.3	236955	probe	45	138	1/ IVT	238359	85.35	194.42	2792.77	0.04	0
hCG1641005.2	103458	probe	172	133	1/ IVT	392.35	0.21	0.35	392.35	4.66	1
hCG1641006.3	112057	probe	165	48	1/ IVT	11390.3	65.46	10.06	173.99	0.04	0
hCG1641006.3	222653	probe	234	51	1/ IVT	85751.6	70.5	75.7	1216.38	0.04	0
hCG1641013.3	134700	probe	49	38	1/ IVT	452.21	3.31	0.37	136.63	0.3	0
hCG1641014.4	109793	probe	206	93	1/ IVT	468.9	3.5	0.41	133.89	0.29	0
hCG1641016.3	713820	probe	188	12	1/ IVT	438.31	1.41	0.39	311.75	0.71	0
hCG1641016.3	223065	probe	216	150	1/ IVT	261.85	-0.54	0.23	261.85	1.85	1
hCG1641019.3	204036	probe	158	154	1/ IVT	14937.5	62.44	13.19	239.25	0.04	0
hCG1641021.3	229250	probe	25	146	1/ IVT	264.11	1.81	0.22	146.02	0.55	0
hCG1641023.2	149846	probe	26	66	1/ IVT	613328	113.65	500.26	5396.87	0.04	64
hCG1641024.2	119727	probe	173	1	1/ IVT	2278.66	31.95	2.01	71.32	0.05	0
hCG1641026.3	224505	probe	8	54	1/ IVT	1368.57	7.79	1.12	175.72	0.13	0
hCG1641026.3	181667	probe	16	105	1/ IVT	369.2	1.28	0.3	287.7	0.78	0
hCG1641027.3	125219	probe	97	52	1/ IVT	1270.62	6.24	1.04	203.6	0.16	0
hCG1641028.3	130519	probe	90	142	1/ IVT	1161.78	4.13	0.95	281.43	0.24	0
hCG1641029.5	218092	probe	24	101	1/ IVT	318.38	2	0.26	158.99	0.5	0
hCG1641029.5	151750	probe	213	44	1/ IVT	7205.39	36.07	6.36	199.76	0.05	0
hCG1641032.4	132043	probe	104	63	1/ IVT	8565.04	39.49	6.99	216.87	0.04	0
hCG1641034.2	103793	probe	89	19	1/ IVT	21264.6	26.53	17.34	801.4	0.05	0
hCG1641041.3	108964	probe	179	114	1/ IVT	11176	22.07	9.87	506.41	0.06	0
hCG1641044.3	231499	probe	236	98	1/ IVT	292.05	1.15	0.26	253.01	0.87	0
hCG1641045.3	180672	probe	176	9	1/ IVT	1084.58	5.8	0.96	186.91	0.18	0
hCG1641046.2	166990	probe	5	62	1/ IVT	433131	83.83	353.29	5166.77	0.04	0
hCG1641050.5	213947	probe	79	25	1/ IVT	32060.8	88.95	26.15	360.43	0.04	0
hCG1641051.2	185703	probe	106	86	1/ IVT	759.23	4.83	0.62	157.11	0.21	0
hCG1641052.3	146467	probe	191	19	1/ IVT	258.67	1.69	0.23	152.86	0.59	0
hCG1641059.3	178980	probe	35	24	1/ IVT	4189.66	12.25	3.42	342.12	0.09	0
hCG1641060.2	130690	probe	203	24	1/ IVT	6245.82	39.76	5.51	157.08	0.05	0
hCG1641061.3	134277	probe	187	30	1/ IVT	522.58	5.53	0.46	94.44	0.18	0
hCG1641062.3	121291	probe	109	125	1/ IVT	5764.87	8.18	4.7	704.74	0.13	0
hCG1641065.4	232195	probe	217	74	1/ IVT	9412.22	51.73	8.31	181.95	0.04	0
hCG1641068.3	232512	probe	27	46	1/ IVT	118.42	-0.18	0.1	118.42	5.68	1
hCG1641069.2	185973	probe	232	63	1/ IVT	3340.73	32.54	2.95	102.66	0.05	0
hCG1641073.1	113776	probe	125	125	1/ IVT	127570	71.54	112.62	1783.14	0.04	0
hCG1641077.4	230054	probe	64	38	1/ IVT	1930.91	18.75	1.57	102.97	0.06	0
hCG1641086.2	202242	probe	7	58	1/ IVT	961.9	5.11	0.78	188.33	0.2	0
hCG1641087.2	175663	probe	7	39	1/ IVT	282.01	1.42	0.23	198.9	0.71	0
hCG1641096.3	197227	probe	185	49	1/ IVT	176.51	0.13	0.16	176.51	7.62	1
hCG1641104.3	127872	probe	115	43	1/ IVT	643.66	5.64	0.53	114.04	0.18	0
hCG1641106.4	179425	probe	109	4	1/ IVT	144760	60.82	118.07	2380.14	0.04	0
hCG1641108.2	180331	probe	53	44	1/ IVT	216.73	0.53	0.18	216.73	1.87	1
hCG1641109.3	102421	probe	5	39	1/ IVT	350.95	2.12	0.29	165.3	0.47	0
hCG1641110.3	136211	probe	174	136	1/ IVT	171.43	0.37	0.15	171.43	2.69	1
hCG1641111.2	173654	probe	146	145	1/ IVT	567.38	5.69	0.5	99.66	0.18	0
hCG1641112.4	102063	probe	152	11	1/ IVT	18434	51.06	16.27	361.01	0.04	0
hCG1641117.3	115556	probe	151	127	1/ IVT	181.27	0.58	0.16	181.27	1.71	1
hCG1641117.3	394176	probe	186	102	1/ IVT	7302.33	29.44	6.45	248.05	0.05	0
hCG1641126.2	121028	probe	197	12	1/ IVT	330.1	1.58	0.29	209.29	0.64	0
hCG1641127.2	155784	probe	121	138	1/ IVT	82702.5	48.9	73.01	1691.18	0.04	0
hCG1641133.3	164845	probe	16	118	1/ IVT	1569.99	13.31	1.28	117.95	0.08	0
hCG1641133.3	122520	probe	158	66	1/ IVT	380.36	2.16	0.34	175.73	0.46	0
hCG1641134.2	233220	probe	9	98	1/ IVT	2164.93	8.73	1.77	248.08	0.12	0
hCG1641137.3	675241	probe	129	14	1/ IVT	282.48	0.6	0.25	282.48	1.66	1
hCG1641137.3	481675	probe	189	70	1/ IVT	304.92	4.23	0.27	72.01	0.24	0
hCG1641138.2	219839	probe	50	96	1/ IVT	403.9	1	0.33	403.9	1	1
hCG1641138.2	216611	probe	50	134	1/ IVT	12068.1	45.27	9.84	266.57	0.04	0
hCG1641141.2	144972	probe	215	62	1/ IVT	1190.59	7.27	1.05	163.72	0.14	0
hCG1641145.3	173256	probe	61	154	1/ IVT	31993	80.13	26.1	399.25	0.04	0
hCG1641146.4	141183	probe	121	146	1/ IVT	171822	56.86	151.68	3021.91	0.04	0
hCG1641147.3	143393	probe	53	47	1/ IVT	354.64	1	0.29	354.64	1.01	1
hCG1641147.3	226550	probe	211	4	1/ IVT	850.09	6.44	0.75	132.01	0.16	0
hCG1641148.2	173964	probe	9	78	1/ IVT	19670.5	75.71	16.04	259.8	0.04	0
hCG1641148.2	127696	probe	113	45	1/ IVT	3345.17	15.33	2.73	218.16	0.07	0
hCG1641157.3	233815	probe	95	16	1/ IVT	431.6	0.68	0.35	431.6	1.46	1
hCG1641167.3	179512	probe	157	58	1/ IVT	167.34	0.11	0.15	167.34	9.38	1
hCG1641171.3	236496	probe	130	93	1/ IVT	27601.4	18.74	24.37	1472.68	0.07	0
hCG1641173.2	190775	probe	163	119	1/ IVT	189.86	-0.95	0.17	189.86	1.05	1
hCG1641180.3	184452	probe	137	43	1/ IVT	1.85669e+06	62.2	1639.09	29849.5	0.04	4
hCG1641184.4	212210	probe	205	89	1/ IVT	675.13	1.84	0.6	367.13	0.55	0
hCG1641188.3	205129	probe	151	104	1/ IVT	5651.38	36.44	4.99	155.1	0.05	0
hCG1641189.3	196593	probe	85	144	1/ IVT	11727.7	45.97	9.57	255.14	0.04	0
hCG1641198.2	132576	probe	111	114	1/ IVT	288.59	1.22	0.24	236.39	0.82	0
hCG1641199.2	107613	probe	54	95	1/ IVT	215.92	-0.84	0.18	215.92	1.19	1
hCG16412.3	216719	probe	222	158	1/ IVT	158.55	0.92	0.14	158.55	1.09	1
hCG1641200.4	166377	probe	205	93	1/ IVT	30854	59.7	27.24	516.78	0.04	0
hCG1641204.4	143298	probe	37	92	1/ IVT	42267.3	58.88	34.48	717.86	0.04	0
hCG1641209.2	178677	probe	175	148	1/ IVT	88431.8	75.89	78.07	1165.22	0.04	0
hCG1641210.3	115502	probe	222	115	1/ IVT	110919	93.28	97.92	1189.13	0.04	0
hCG1641215.3	184645	probe	127	78	1/ IVT	196.99	-0.75	0.17	196.99	1.34	1
hCG1641222.3	126493	probe	73	106	1/ IVT	1605.06	0.5	1.31	1605.06	2	1
hCG1641222.3	209109	probe	223	128	1/ IVT	239.59	-0.5	0.21	239.59	1.98	1
hCG1641224.3	233446	probe	98	70	1/ IVT	302.15	-0.71	0.25	302.15	1.41	1
hCG1641225.3	106309	probe	149	71	1/ IVT	613.8	0.94	0.54	613.8	1.07	1
hCG1641227.3	125187	probe	84	5	1/ IVT	90.73	-0.89	0.07	90.73	1.12	1
hCG1641229.2	192176	probe	230	127	1/ IVT	230868	49.75	203.81	4640.27	0.04	0
hCG1641230.3	118662	probe	214	14	1/ IVT	35964.1	73.15	31.75	491.67	0.04	0
hCG1641231.3	162764	probe	167	18	1/ IVT	1475.08	12.84	1.3	114.84	0.09	0
hCG1641236.3	162353	probe	225	82	1/ IVT	26784	100.73	23.64	265.89	0.04	0
hCG1641237.3	210534	probe	83	114	1/ IVT	45399.7	81.13	37.03	559.56	0.04	0
hCG1641238.3	102450	probe	189	97	1/ IVT	115.51	0.53	0.1	115.51	1.88	1
hCG1641241.3	216424	probe	172	22	1/ IVT	61026.7	63.94	53.87	954.44	0.04	0
hCG1641243.2	161819	probe	151	142	1/ IVT	45977.9	76.85	40.59	598.29	0.04	0
hCG1641244.2	111405	probe	123	22	1/ IVT	811097	68.73	716.04	11801.5	0.04	0
hCG1641245.2	144565	probe	157	119	1/ IVT	2350.65	9.02	2.08	260.58	0.12	0
hCG1641252.2	112738	probe	58	65	1/ IVT	88971.7	69.94	72.57	1272.06	0.04	0
hCG1641254.3	186169	probe	184	57	1/ IVT	40812	46.12	36.03	884.94	0.04	0
hCG1641267.5	186684	probe	7	57	1/ IVT	954.49	12.51	0.78	76.32	0.09	0
hCG1641270.4	141703	probe	178	89	1/ IVT	339029	93.01	299.29	3644.93	0.04	0
hCG1641276.4	159741	probe	151	153	1/ IVT	294.22	-2	0.26	294.22	0.5	1
hCG1641280.3	102730	probe	34	53	1/ IVT	143.46	0.28	0.12	143.46	3.6	1
hCG1641281.4	164267	probe	110	105	1/ IVT	11314.9	36.42	9.23	310.67	0.04	0
hCG1641285.2	125513	probe	129	114	1/ IVT	100.09	-2.51	0.09	100.09	0.4	1
hCG1641297.2	202138	probe	39	108	1/ IVT	231559	93.94	188.87	2465.02	0.04	0
hCG16413.2	145499	probe	199	94	1/ IVT	838.35	4.92	0.74	170.55	0.21	0
hCG1641301.3	145258	probe	136	35	1/ IVT	11051.2	54.24	9.76	203.75	0.04	0
hCG1641304.2	135075	probe	177	56	1/ IVT	312.68	4.11	0.28	76	0.25	0
hCG1641312.3	157804	probe	31	2	1/ IVT	8033.58	20.92	6.55	384.06	0.06	0
hCG1641325.2	213429	probe	167	136	1/ IVT	673736	115.21	594.77	5847.81	0.04	0
hCG1641328.2	100830	probe	103	13	1/ IVT	240.22	-0.09	0.2	240.22	10.77	1
hCG1641337.1	160411	probe	147	16	1/ IVT	194.3	0.29	0.17	194.3	3.48	1
hCG1641338.3	213788	probe	216	105	1/ IVT	455.88	-0.55	0.4	455.88	1.81	1
hCG1641339.3	101931	probe	79	118	1/ IVT	65018.5	100.64	53.03	646.07	0.04	0
hCG1641340.3	111029	probe	224	43	1/ IVT	1931.77	10.74	1.71	179.92	0.1	0
hCG1641345.1	178221	probe	135	144	1/ IVT	256.49	1.2	0.23	213.31	0.83	0
hCG1641355.4	236177	probe	56	63	1/ IVT	831477	99.26	678.2	8376.97	0.04	0
hCG1641357.3	163619	probe	126	27	1/ IVT	280.28	0.25	0.25	280.28	3.93	1
hCG1641358.3	203170	probe	236	34	1/ IVT	20221.8	54.31	17.85	372.32	0.04	0
hCG1641359.3	184519	probe	62	118	1/ IVT	2878.3	19	2.35	151.51	0.06	0
hCG1641362.3	236317	probe	67	153	1/ IVT	14664.7	27.64	11.96	530.65	0.05	0
hCG1641364.3	149391	probe	89	38	1/ IVT	181.89	0.21	0.15	181.89	4.76	1
hCG1641368.3	177367	probe	84	137	1/ IVT	310.1	2.03	0.25	152.62	0.49	0
hCG1641375.2	119386	probe	101	4	1/ IVT	16404.8	62.49	13.38	262.53	0.04	0
hCG1641378.3	190050	probe	2	66	1/ IVT	18779.5	60.69	15.32	309.42	0.04	0
hCG1641384.3	152509	probe	25	13	1/ IVT	965.5	5.52	0.79	174.76	0.18	0
hCG1641386.3	120415	probe	75	91	1/ IVT	11637.7	19.98	9.49	582.47	0.06	0
hCG1641393.3	228958	probe	92	6	1/ IVT	1827.34	3.33	1.49	548.34	0.3	0
hCG1641398.4	236445	probe	97	93	1/ IVT	16936.2	48.32	13.81	350.49	0.04	0
hCG1641407.3	222524	probe	179	112	1/ IVT	950114	86.88	838.76	10936.4	0.04	0
hCG1641409.2	123731	probe	92	51	1/ IVT	3309.46	6.02	2.7	549.64	0.17	0
hCG1641410.2	196135	probe	78	78	1/ IVT	838.12	1.78	0.68	469.87	0.56	0
hCG1641411.3	131407	probe	13	102	1/ IVT	2597.02	24.25	2.12	107.09	0.05	0
hCG1641416.1	185528	probe	139	111	1/ IVT	340.39	2.46	0.3	138.45	0.41	0
hCG1641423.3	211169	probe	65	17	1/ IVT	511756	49.39	417.42	10360.6	0.04	0
hCG1641424.3	209101	probe	74	35	1/ IVT	167394	29.07	136.54	5758.69	0.05	0
hCG1641424.3	218527	probe	124	134	1/ IVT	2971.43	22.73	2.62	130.73	0.06	0
hCG1641424.3	167138	probe	187	12	1/ IVT	23019.9	37.43	20.32	614.96	0.05	0
hCG1641425.4	229003	probe	84	2	1/ IVT	2506.04	14.96	2.04	167.51	0.08	0
hCG1641431.3	216952	probe	9	133	1/ IVT	462962	64.39	377.62	7189.52	0.04	0
hCG1641432.3	161183	probe	86	24	1/ IVT	4734.61	22.4	3.86	211.4	0.06	0
hCG1641433.3	222062	probe	192	50	1/ IVT	348150	102.71	307.35	3389.8	0.04	0
hCG1641433.3	212650	probe	212	111	1/ IVT	63788	85.52	56.31	745.89	0.04	0
hCG1641434.4	236585	probe	43	105	1/ IVT	203515	52	166	3913.48	0.04	0
hCG1641437.1	186921	probe	52	109	1/ IVT	6045.99	38.05	4.93	158.89	0.04	0
hCG1641438.1	211133	probe	230	37	1/ IVT	525.93	13.43	0.46	39.16	0.08	0
hCG1641439.3	229515	probe	132	74	1/ IVT	586.79	5.33	0.52	110	0.19	0
hCG1641444.2	142008	probe	82	110	1/ IVT	65848.8	59.71	53.71	1102.84	0.04	0
hCG1641447.2	149730	probe	223	69	1/ IVT	2570.81	15.94	2.27	161.3	0.07	0
hCG1641450.3	161914	probe	198	56	1/ IVT	9447.8	63.49	8.34	148.81	0.04	0
hCG1641456.3	138193	probe	38	109	1/ IVT	813	1.81	0.66	448.99	0.55	0
hCG1641457.3	138287	probe	38	151	1/ IVT	20382	69.5	16.62	293.25	0.04	0
hCG1641458.3	224381	probe	85	118	1/ IVT	396.16	2.23	0.32	177.93	0.45	0
hCG1641460.2	173367	probe	102	57	1/ IVT	10165.5	18.73	8.29	542.87	0.06	0
hCG1641463.2	100635	probe	169	30	1/ IVT	5314.91	13.74	4.69	386.96	0.08	0
hCG1641464.2	170987	probe	227	16	1/ IVT	327.91	-0.6	0.29	327.91	1.66	1
hCG1641466.4	233268	probe	107	128	1/ IVT	11933.5	9.49	9.73	1257.49	0.11	0
hCG1641470.4	175820	probe	135	135	1/ IVT	9900.14	50.24	8.74	197.07	0.04	0
hCG1641470.4	154326	probe	231	122	1/ IVT	22450	63.21	19.82	355.16	0.04	0
hCG1641471.2	230029	probe	238	69	1/ IVT	3076.5	16.32	2.72	188.46	0.07	0
hCG1641475.1	176417	probe	102	112	1/ IVT	206.23	1.26	0.17	163.61	0.79	0
hCG1641477.4	236186	probe	87	152	1/ IVT	276.09	0.22	0.23	276.09	4.51	1
hCG1641481.2	212372	probe	24	82	1/ IVT	302.53	1.48	0.25	204.18	0.68	0
hCG1641486.3	206762	probe	105	147	1/ IVT	277.54	-0.24	0.23	277.54	4.2	1
hCG1641487.4	147050	probe	215	51	1/ IVT	234.15	0.96	0.21	234.15	1.04	1
hCG1641490.2	149565	probe	117	14	1/ IVT	5845.56	-0.31	4.77	5845.56	3.22	1
hCG1641491.4	104827	probe	50	97	1/ IVT	198.53	-0.11	0.16	198.53	9.07	1
hCG1641496.4	144452	probe	44	25	1/ IVT	430.36	10.98	0.35	39.2	0.1	0
hCG1641497.3	161727	probe	164	36	1/ IVT	2796.4	11.26	2.47	248.37	0.1	0
hCG1641498.3	198317	probe	78	131	1/ IVT	169.36	-1.4	0.14	169.36	0.72	1
hCG16415.3	193005	probe	117	88	1/ IVT	137.75	-0.91	0.11	137.75	1.1	1
hCG1641501.2	191578	probe	138	4	1/ IVT	421727	45.83	372.3	9202.16	0.04	0
hCG1641505.2	124046	probe	74	89	1/ IVT	32870.8	38.95	26.81	843.87	0.04	0
hCG1641507.1	218928	probe	236	135	1/ IVT	1810.04	0.92	1.6	1810.04	1.09	1
hCG1641508.3	206170	probe	134	81	1/ IVT	6858.11	11.09	6.05	618.6	0.1	0
hCG1641509.3	106323	probe	99	154	1/ IVT	268	-0.87	0.22	268	1.15	1
hCG1641510.4	158076	probe	81	129	1/ IVT	467.27	0.24	0.38	467.27	4.23	1
hCG1641511.4	118724	probe	43	50	1/ IVT	36462.1	62.98	29.74	578.95	0.04	0
hCG1641512.3	236641	probe	27	25	1/ IVT	112.56	0.97	0.09	112.56	1.04	1
hCG1641516.2	605037	probe	88	7	1/ IVT	385.31	1.43	0.31	269.9	0.7	0
hCG1641518.3	194927	probe	62	35	1/ IVT	397116	90.46	323.91	4390.14	0.04	0
hCG1641519.2	111216	probe	47	88	1/ IVT	1.17563e+06	78.09	958.9	15055	0.04	0
hCG1641521.3	235812	probe	88	110	1/ IVT	6120.95	33.38	4.99	183.38	0.05	0
hCG1641521.3	109189	probe	237	64	1/ IVT	562.43	5.71	0.5	98.5	0.18	0
hCG1641525.3	189281	probe	103	17	1/ IVT	818.5	0.41	0.67	818.5	2.44	1
hCG1641527.3	143427	probe	132	143	1/ IVT	277.93	-1.15	0.25	277.93	0.87	1
hCG1641532.3	213722	probe	61	129	1/ IVT	3794.85	27.31	3.1	138.96	0.05	0
hCG1641533.2	198623	probe	67	47	1/ IVT	344.2	-1.49	0.28	344.2	0.67	1
hCG1641538.4	157350	probe	169	54	1/ IVT	515.62	1.95	0.46	264.54	0.51	0
hCG1641539.2	157195	probe	225	112	1/ IVT	116.46	0.68	0.1	116.46	1.47	1
hCG1641541.2	182266	probe	145	139	1/ IVT	196.42	-1.39	0.17	196.42	0.72	1
hCG1641544.3	234913	probe	94	109	1/ IVT	1223.64	-0.15	1	1223.64	6.79	1
hCG1641546.3	545168	probe	26	96	1/ IVT	70.31	1.67	0.06	42	0.6	0
hCG1641546.3	121551	probe	89	110	1/ IVT	1881.44	9.33	1.53	201.6	0.11	0
hCG1641546.3	178904	probe	168	92	1/ IVT	473.32	4.52	0.42	104.81	0.22	0
hCG1641550.3	142494	probe	38	66	1/ IVT	361189	108.64	294.61	3324.7	0.04	64
hCG1641555.2	158699	probe	16	76	1/ IVT	291.35	2.89	0.24	100.83	0.35	0
hCG1641556.3	236371	probe	86	42	1/ IVT	720167	50.52	587.41	14254.7	0.04	0
hCG1641561.3	105503	probe	56	65	1/ IVT	5183.96	34.57	4.23	149.96	0.05	0
hCG1641564.2	162119	probe	31	142	1/ IVT	2978.48	15.88	2.43	187.57	0.07	0
hCG1641566.2	112524	probe	38	33	1/ IVT	376406	77.6	307.02	4850.64	0.04	0
hCG1641569.2	207278	probe	123	99	1/ IVT	9267.61	23.59	8.18	392.86	0.06	0
hCG1641571.3	144226	probe	71	82	1/ IVT	6936.32	16.09	5.66	431.06	0.07	0
hCG1641571.3	199779	probe	134	47	1/ IVT	12427.5	35.05	10.97	354.57	0.05	0
hCG1641572.3	207068	probe	95	74	1/ IVT	91353.1	76.39	74.51	1195.89	0.04	0
hCG1641574.2	178077	probe	50	22	1/ IVT	163.57	-0.89	0.13	163.57	1.12	1
hCG1641577.3	110709	probe	169	34	1/ IVT	18165.2	54.2	16.04	335.18	0.04	0
hCG1641578.3	228889	probe	206	57	1/ IVT	21678	40.08	19.14	540.91	0.05	0
hCG1641579.2	236837	probe	49	142	1/ IVT	38385.5	73.18	31.31	524.53	0.04	0
hCG1641586.2	172316	probe	157	55	1/ IVT	182.61	0.91	0.16	182.61	1.1	1
hCG1641587.2	533601	probe	55	75	1/ IVT	416.98	2.29	0.34	181.93	0.44	0
hCG1641589.3	176580	probe	110	24	1/ IVT	22918	51.94	18.69	441.2	0.04	0
hCG1641595.3	155691	probe	106	31	1/ IVT	5236.79	38.53	4.27	135.91	0.04	0
hCG1641601.4	133356	probe	199	52	1/ IVT	274467	111.25	242.3	2467.02	0.04	0
hCG1641602.3	214300	probe	122	132	1/ IVT	392.18	5.18	0.35	75.73	0.2	0
hCG1641604.4	159731	probe	223	9	1/ IVT	217931	110.25	192.39	1976.68	0.04	0
hCG1641605.3	160246	probe	55	125	1/ IVT	4733.3	4.43	3.86	1068.76	0.23	0
hCG1641609.2	182098	probe	61	133	1/ IVT	206.6	1.29	0.17	160.3	0.78	0
hCG1641611.1	214479	probe	173	132	1/ IVT	1.12929e+06	119.86	996.94	9422.13	0.04	0
hCG1641614.4	236351	probe	138	57	1/ IVT	346428	84.31	305.83	4108.74	0.04	0
hCG1641615.3	138143	probe	15	99	1/ IVT	1077.07	-0.45	0.88	1077.07	2.24	1
hCG1641616.2	111981	probe	114	58	1/ IVT	598.95	3.81	0.49	157.03	0.26	0
hCG1641617.1	714590	probe	171	66	1/ IVT	39395.2	115.44	34.78	341.26	0.04	64
hCG1641618.4	228835	probe	67	30	1/ IVT	119.47	-2.07	0.1	119.47	0.48	1
hCG1641620.3	111370	probe	174	59	1/ IVT	1241.76	9.16	1.1	135.49	0.12	0
hCG1641623.3	183871	probe	35	95	1/ IVT	7919.62	40.43	6.46	195.86	0.04	0
hCG1641625.3	129379	probe	123	12	1/ IVT	1911.69	9.41	1.69	203.1	0.11	0
hCG1641625.3	169988	probe	153	97	1/ IVT	1870.7	16.9	1.65	110.69	0.07	0
hCG1641627.3	189366	probe	211	6	1/ IVT	71602	57.49	63.21	1245.44	0.04	0
hCG1641630.3	187111	probe	91	9	1/ IVT	297.92	0.37	0.24	297.92	2.68	1
hCG1641631.3	189406	probe	63	48	1/ IVT	14061.1	59.6	11.47	235.92	0.04	0
hCG1641635.4	233109	probe	117	138	1/ IVT	1150.5	7.97	0.94	144.35	0.13	64
hCG1641642.1	169857	probe	83	1	1/ IVT	15703.3	27.66	12.81	567.77	0.05	0
hCG1641647.2	160812	probe	224	131	1/ IVT	174962	56.2	154.46	3113.11	0.04	0
hCG1641650.3	213263	probe	92	127	1/ IVT	1749.74	-0.12	1.43	1749.74	8.42	1
hCG1641653.2	233820	probe	156	72	1/ IVT	640.78	1.13	0.57	567.03	0.89	0
hCG1641665.1	106740	probe	178	70	1/ IVT	3504.38	21.76	3.09	161.03	0.06	0
hCG1641666.1	169493	probe	57	110	1/ IVT	579237	82.9	472.46	6986.8	0.04	0
hCG1641678.1	195213	probe	112	128	1/ IVT	760024	61.68	619.92	12322.7	0.04	0
hCG1641685.3	236397	probe	179	14	1/ IVT	1.46832e+06	96.97	1296.23	15141.7	0.04	0
hCG1641688.2	181876	probe	181	47	1/ IVT	6243.38	37.29	5.51	167.43	0.05	0
hCG1641692.2	229867	probe	134	92	1/ IVT	842744	40.15	743.97	20989.7	0.05	0
hCG1641699.4	197450	probe	230	74	1/ IVT	1829.86	3.94	1.62	464.94	0.26	0
hCG16417.2	153243	probe	138	7	1/ IVT	164768	41.58	145.46	3963.1	0.05	0
hCG1641702.3	212674	probe	19	10	1/ IVT	257.77	-0.46	0.21	257.77	2.15	1
hCG1641703.2	182281	probe	101	156	1/ IVT	892203	81.23	727.73	10984	0.04	0
hCG1641707.4	105686	probe	123	135	1/ IVT	6781.66	9.01	5.99	752.88	0.12	0
hCG1641715.4	138809	probe	133	58	1/ IVT	6659	38.06	5.88	174.94	0.05	0
hCG1641716.3	121227	probe	207	116	1/ IVT	186027	61.43	164.22	3028.36	0.04	0
hCG1641721.4	169642	probe	37	48	1/ IVT	384.31	-0.18	0.31	384.31	5.56	1
hCG1641723.3	150804	probe	38	118	1/ IVT	530.82	0	0.43	530.82	270.92	1
hCG1641727.2	230526	probe	127	118	1/ IVT	363.78	2.23	0.32	162.95	0.45	0
hCG1641730.3	202795	probe	69	132	1/ IVT	2334.18	3.5	1.9	667.76	0.29	0
hCG1641733.2	121093	probe	122	151	1/ IVT	205.85	0.34	0.18	205.85	2.92	1
hCG1641736.2	163598	probe	139	42	1/ IVT	2802.5	19.96	2.47	140.4	0.06	0
hCG1641737.2	104890	probe	191	63	1/ IVT	32722.6	100.94	28.89	324.19	0.04	64
hCG1641751.3	714115	probe	190	131	1/ IVT	1282.79	23.69	1.13	54.16	0.06	0
hCG1641752.3	224412	probe	185	112	1/ IVT	7103.37	46.15	6.27	153.92	0.04	0
hCG1641752.3	101122	probe	203	3	1/ IVT	558.7	3	0.49	186.17	0.34	0
hCG1641754.3	197256	probe	237	50	1/ IVT	1500.4	6.72	1.32	223.43	0.15	0
hCG1641756.3	164097	probe	96	114	1/ IVT	510.66	0.28	0.42	510.66	3.61	1
hCG1641756.3	102684	probe	149	73	1/ IVT	197.36	-0.03	0.17	197.36	34.54	1
hCG1641757.2	200516	probe	26	114	1/ IVT	8155.13	47.07	6.65	173.25	0.04	0
hCG1641761.3	136853	probe	98	146	1/ IVT	1146.97	-1.11	0.94	1146.97	0.9	1
hCG1641764.3	119763	probe	25	67	1/ IVT	570728	101.95	465.52	5598.31	0.04	0
hCG1641769.2	236621	probe	116	69	1/ IVT	619168	78.98	505.03	7839.76	0.04	0
hCG1641774.2	143863	probe	5	107	1/ IVT	18539.4	53.75	15.12	344.95	0.04	0
hCG1641777.3	193683	probe	106	77	1/ IVT	783.56	3.27	0.64	239.75	0.31	0
hCG1641780.2	129133	probe	119	30	1/ IVT	12960.4	44.83	10.57	289.12	0.04	0
hCG1641781.2	193172	probe	103	62	1/ IVT	1394.42	3.07	1.14	454.23	0.33	0
hCG1641782.1	167512	probe	228	18	1/ IVT	14065.4	39.19	12.42	358.9	0.05	0
hCG1641783.1	178056	probe	105	116	1/ IVT	507.13	0.85	0.41	507.13	1.18	1
hCG1641784.2	119151	probe	106	116	1/ IVT	251462	74.64	205.11	3368.89	0.04	0
hCG1641787.3	172036	probe	199	123	1/ IVT	115.13	-1.75	0.1	115.13	0.57	1
hCG1641788.3	181200	probe	230	158	1/ IVT	13236.4	24.19	11.69	547.29	0.06	0
hCG1641789.3	144407	probe	138	128	1/ IVT	319.37	0.44	0.28	319.37	2.3	1
hCG1641791.3	236364	probe	56	105	1/ IVT	334261	79.35	272.64	4212.58	0.04	0
hCG1641796.2	231257	probe	230	19	1/ IVT	142.84	0.93	0.13	142.84	1.08	1
hCG1641799.4	231181	probe	85	58	1/ IVT	222.18	-0.1	0.18	222.18	10.17	1
hCG1641804.3	171575	probe	185	75	1/ IVT	297.83	2.89	0.26	103.16	0.35	0
hCG1641814.2	145937	probe	97	106	1/ IVT	5924.98	28.86	4.83	205.28	0.05	0
hCG1641818.3	119865	probe	108	157	1/ IVT	432.09	1.98	0.35	218.61	0.51	0
hCG1641819.3	145459	probe	18	132	1/ IVT	137.72	-1.03	0.11	137.72	0.97	1
hCG1641822.4	110802	probe	106	112	1/ IVT	57609.8	59.13	46.99	974.26	0.04	0
hCG1641824.4	135422	probe	96	88	1/ IVT	360.98	-0.69	0.29	360.98	1.45	1
hCG1641825.3	233366	probe	9	71	1/ IVT	6472.43	44.02	5.28	147.03	0.04	0
hCG1641832.3	133933	probe	202	104	1/ IVT	1225.16	1.08	1.08	1134	0.93	0
hCG1641833.3	198223	probe	149	7	1/ IVT	546.48	-0.97	0.48	546.48	1.03	1
hCG1641833.3	234605	probe	230	146	1/ IVT	664.97	-0.99	0.59	664.97	1.01	1
hCG1641837.2	659748	probe	90	6	1/ IVT	21314.5	20.79	17.39	1025.4	0.06	0
hCG1641845.2	181670	probe	167	124	1/ IVT	774.41	1.71	0.68	453.02	0.59	0
hCG1641860.4	153385	probe	175	68	1/ IVT	6848.7	32.72	6.05	209.3	0.05	0
hCG1641866.1	198154	probe	43	117	1/ IVT	1040.04	-0.02	0.85	1040.04	65.24	1
hCG1641869.2	120117	probe	151	24	1/ IVT	346.73	-0.15	0.31	346.73	6.78	1
hCG1641872.3	229412	probe	81	48	1/ IVT	1962.17	13.72	1.6	143.04	0.08	0
hCG1641874.2	104878	probe	139	63	1/ IVT	143.43	-0.22	0.13	143.43	4.61	1
hCG1641883.2	141071	probe	179	158	1/ IVT	5332.52	24.31	4.71	219.39	0.06	0
hCG1641887.3	178269	probe	27	59	1/ IVT	974195	85.47	794.61	11398	0.04	0
hCG1641895.2	170223	probe	179	41	1/ IVT	520036	103.07	459.09	5045.49	0.04	0
hCG1641896.4	200885	probe	154	1	1/ IVT	506.68	0.51	0.45	506.68	1.98	1
hCG1641900.2	164008	probe	98	77	1/ IVT	5684.31	23.09	4.64	246.14	0.06	0
hCG1641902.2	236495	probe	63	143	1/ IVT	28981.3	91.29	23.64	317.46	0.04	64
hCG1641905.4	196743	probe	230	122	1/ IVT	313.67	3.06	0.28	102.46	0.33	0
hCG1641907.2	114692	probe	127	111	1/ IVT	217.13	-1.96	0.19	217.13	0.51	1
hCG1641913.2	229771	probe	47	52	1/ IVT	269.89	1.3	0.22	206.99	0.77	0
hCG1641919.3	233162	probe	145	145	1/ IVT	1625.41	10.56	1.43	153.98	0.1	0
hCG1641926.2	135526	probe	130	43	1/ IVT	453.8	1.14	0.4	397.79	0.88	0
hCG1641929.1	129802	probe	83	135	1/ IVT	10490.5	21.48	8.56	488.38	0.06	0
hCG1641930.2	128923	probe	191	7	1/ IVT	3245.74	10.92	2.87	297.32	0.1	0
hCG1641932.2	211285	probe	99	42	1/ IVT	1.24157e+06	72.1	1012.69	17220.9	0.04	0
hCG1641945.4	232398	probe	209	134	1/ IVT	331.17	-0.5	0.29	331.17	1.99	1
hCG1641949.2	234176	probe	235	7	1/ IVT	150.52	-0.31	0.13	150.52	3.18	1
hCG1641952.3	132030	probe	148	117	1/ IVT	276.07	0	0.24	276.07	906.77	1
hCG1641955.3	191090	probe	11	155	1/ IVT	175.17	0.11	0.14	175.17	9.48	1
hCG1641961.3	172158	probe	197	110	1/ IVT	129.13	-0.17	0.11	129.13	5.95	1
hCG1641962.2	191402	probe	99	50	1/ IVT	403.51	1.83	0.33	220.6	0.55	0
hCG1641962.2	229637	probe	111	78	1/ IVT	152.87	0.73	0.12	152.87	1.37	1
hCG1641974.2	196184	probe	12	123	1/ IVT	23375.4	53.99	19.07	432.99	0.04	0
hCG1641980.5	215650	probe	64	74	1/ IVT	67549.4	100.01	55.1	675.45	0.04	0
hCG1641980.5	234709	probe	153	106	1/ IVT	591.15	1.56	0.52	378.34	0.64	0
hCG16420.3	207619	probe	52	31	1/ IVT	940.9	4.31	0.77	218.18	0.23	0
hCG1642005.2	167160	probe	185	30	1/ IVT	401.57	4.72	0.35	85	0.22	0
hCG1642007.4	236904	probe	144	49	1/ IVT	851627	57.75	751.82	14745.6	0.04	0
hCG1642013.3	161355	probe	107	116	1/ IVT	1154.61	2.56	0.94	451.38	0.39	0
hCG1642014.2	228613	probe	223	73	1/ IVT	82.28	-1.04	0.07	82.28	0.96	1
hCG1642024.3	233788	probe	184	62	1/ IVT	68.15	-0.14	0.06	68.15	7.15	1
hCG1642031.1	125382	probe	28	36	1/ IVT	259.32	1.53	0.21	169.2	0.65	0
hCG1642034.3	100348	probe	31	74	1/ IVT	214.15	0.35	0.17	214.15	2.83	1
hCG1642036.2	699154	probe	71	6	1/ IVT	8336.08	9.79	6.8	851.38	0.11	0
hCG1642036.2	256245	probe	210	130	1/ IVT	605.6	4.46	0.53	135.73	0.23	0
hCG1642042.4	141171	probe	27	71	1/ IVT	267.78	-1.16	0.22	267.78	0.86	1
hCG1642043.1	234761	probe	16	98	1/ IVT	191730	81.47	156.39	2353.51	0.04	0
hCG1642044.3	230790	probe	35	70	1/ IVT	1179.44	6.7	0.96	176.14	0.15	0
hCG1642045.3	395408	probe	151	147	1/ IVT	316.39	-0.49	0.28	316.39	2.03	1
hCG1642046.1	230369	probe	64	68	1/ IVT	7099.61	7.08	5.79	1002.49	0.15	0
hCG1642047.3	107085	probe	108	122	1/ IVT	5408.47	29	4.41	186.5	0.05	0
hCG1642059.3	193586	probe	47	13	1/ IVT	3402.41	3.97	2.78	858.1	0.25	0
hCG1642062.1	163851	probe	3	17	1/ IVT	51189.7	65.84	41.75	777.45	0.04	0
hCG1642068.3	188013	probe	112	65	1/ IVT	133.6	-0.78	0.11	133.6	1.29	1
hCG1642079.2	175188	probe	52	66	1/ IVT	18344	39.75	14.96	461.48	0.04	0
hCG1642082.1	152207	probe	28	79	1/ IVT	534788	116.38	436.2	4595.25	0.04	0
hCG1642084.3	226948	probe	130	95	1/ IVT	4441.18	7.6	3.92	584.38	0.14	64
hCG1642085.3	190112	probe	6	18	1/ IVT	352.78	5.47	0.29	64.52	0.19	0
hCG1642089.3	236166	probe	56	138	1/ IVT	37788.9	74.64	30.82	506.31	0.04	0
hCG1642096.3	224965	probe	146	89	1/ IVT	22086.8	59.83	19.5	369.16	0.04	0
hCG1642097.2	171807	probe	29	8	1/ IVT	204.58	-1.85	0.17	204.58	0.54	1
hCG1642102.2	129778	probe	156	53	1/ IVT	10747.7	32.54	9.49	330.28	0.05	0
hCG1642105.2	205196	probe	230	16	1/ IVT	27657.2	89.97	24.42	307.39	0.04	0
hCG1642105.2	211262	probe	230	126	1/ IVT	3756.49	0.11	3.32	3756.49	8.76	1
hCG1642107.3	178783	probe	176	143	1/ IVT	5594.88	25.96	4.94	215.5	0.05	0
hCG1642115.1	184569	probe	179	3	1/ IVT	174.63	-1.21	0.15	174.63	0.83	1
hCG1642121.3	167726	probe	230	111	1/ IVT	23262.8	17.87	20.54	1302.07	0.07	0
hCG1642124.3	229948	probe	105	65	1/ IVT	164	-1.57	0.13	164	0.64	1
hCG1642128.2	236184	probe	81	3	1/ IVT	323.97	-1.08	0.26	323.97	0.93	1
hCG1642135.3	153495	probe	225	133	1/ IVT	8161.48	43.92	7.2	185.85	0.04	0
hCG1642143.3	144842	probe	133	114	1/ IVT	99684.7	58.62	88	1700.53	0.04	0
hCG1642147.2	146870	probe	170	74	1/ IVT	441.98	-0.66	0.39	441.98	1.52	1
hCG1642151.3	229926	probe	143	23	1/ IVT	373.98	2.77	0.33	134.92	0.36	0
hCG1642153.2	140786	probe	187	63	1/ IVT	10800.7	59.05	9.53	182.92	0.04	0
hCG1642154.3	230210	probe	214	117	1/ IVT	1422.94	11.63	1.26	122.3	0.09	0
hCG1642159.3	195031	probe	47	49	1/ IVT	151.16	-3.02	0.12	151.16	0.33	131073
hCG1642159.3	191607	probe	81	85	1/ IVT	194.19	-2.07	0.16	194.19	0.49	1
hCG1642159.3	234908	probe	108	147	1/ IVT	340.23	1.52	0.28	224.43	0.66	0
hCG1642160.4	113019	probe	94	122	1/ IVT	112539	34.17	91.79	3293.71	0.05	0
hCG1642160.4	174658	probe	166	150	1/ IVT	86.59	-2.49	0.08	86.59	0.4	1
hCG1642166.3	125040	probe	223	1	1/ IVT	115.14	0.46	0.1	115.14	2.17	1
hCG1642170.3	190885	probe	55	29	1/ IVT	11663.3	33.6	9.51	347.08	0.05	0
[truncated: 35,843 more rows]

## Sheet: no null gene
GENE_ID	PROBE_ID	PROBE_TYPE	ROW	COLUMN	HB0055A_10/27/06_1:44_PM_SAMPLE_NAME	HB0055A_10/27/06_1:44_PM_SIGNAL	HB0055A_10/27/06_1:44_PM_S/N	HB0055A_10/27/06_1:44_PM_ASSAY_NORMALIZED_SIGNAL	HB0055A_10/27/06_1:44_PM_SDEV	HB0055A_10/27/06_1:44_PM_CV	HB0055A_10/27/06_1:44_PM_FLAGS
371915	226590	probe	121	23	1/ IVT	105.85	2.44	0.09	43.32	0.41	0
375382	219301	probe	7	34	1/ IVT	1045.79	1.03	0.85	1012.25	0.97	0
395233	226368	probe	191	34	1/ IVT	10102.9	32.55	8.92	310.36	0.05	64
445830	225407	probe	13	95	1/ IVT	6893.42	32.66	5.62	211.04	0.05	0
457707	217527	probe	149	74	1/ IVT	245.89	-1.28	0.22	245.89	0.78	1
473566	217432	probe	215	96	1/ IVT	1602.4	4.21	1.41	380.31	0.24	0
892161	224349	probe	111	58	1/ IVT	2003.3	8.31	1.63	241.08	0.13	0
371247_rc	282357	probe	65	25	1/ IVT	296.96	2.21	0.24	134.13	0.45	0
371247_rc	224689	probe	121	111	1/ IVT	185.98	2.2	0.16	84.69	0.46	0
371630_rc	226296	probe	185	13	1/ IVT	6920.55	28.33	6.11	244.28	0.05	0
371758_rc	220448	probe	62	134	1/ IVT	1220.1	15.32	1	79.65	0.07	0
371922_rc	225638	probe	25	74	1/ IVT	385.12	-0.03	0.31	385.12	38.02	1
371934_rc	219335	probe	131	55	1/ IVT	612.67	5.38	0.54	113.96	0.19	0
372488_rc	227184	probe	213	21	1/ IVT	925.56	3.02	0.82	306.31	0.33	0
374484_rc	218879	probe	105	84	1/ IVT	163.85	-1.64	0.13	163.85	0.61	1
377797_rc	222093	probe	98	41	1/ IVT	461.77	-1.98	0.38	461.77	0.51	1
383363_rc	224427	probe	201	85	1/ IVT	602.31	5.29	0.53	113.82	0.19	0
383950_rc	225730	probe	25	10	1/ IVT	748.73	9.26	0.61	80.82	0.11	0
385515_rc	224264	probe	54	30	1/ IVT	1137.25	12.03	0.93	94.53	0.09	0
387059_rc	223291	probe	69	47	1/ IVT	341.15	0.49	0.28	341.15	2.04	1
387108_rc	220149	probe	53	156	1/ IVT	753.38	4.25	0.61	177.28	0.24	0
388032_rc	226526	probe	158	57	1/ IVT	786.86	5.45	0.69	144.49	0.19	0
390787_rc	227155	probe	158	83	1/ IVT	112.52	-1.78	0.1	112.52	0.56	1
391223_rc	194776	probe	170	86	1/ IVT	831.54	4.57	0.73	182	0.22	0
392786_rc	195641	probe	128	108	1/ IVT	165.07	-1.26	0.15	165.07	0.8	1
404893_rc	225460	probe	127	50	1/ IVT	209.37	-0.17	0.18	209.37	5.77	1
409062_rc	222433	probe	147	92	1/ IVT	2431.34	9.54	2.15	254.83	0.11	0
425346_rc	222009	probe	162	136	1/ IVT	145.76	-1.5	0.13	145.76	0.67	1
451047_rc	225481	probe	141	24	1/ IVT	2115.73	8.63	1.87	245.1	0.12	0
466806_rc	222261	probe	168	133	1/ IVT	45.94	-0.56	0.04	45.94	1.78	1
467567_rc	218668	probe	25	149	1/ IVT	389.91	2.64	0.32	147.72	0.38	0
473897_rc	226693	probe	188	62	1/ IVT	21580.5	71.75	19.05	300.75	0.04	0
475080_rc	219851	probe	89	131	1/ IVT	968.46	5.46	0.79	177.42	0.19	0
477453_rc	121124	probe	190	11	1/ IVT	273.84	0.61	0.24	273.84	1.65	1
478147_rc	220577	probe	155	16	1/ IVT	346.94	1.51	0.31	229.5	0.66	0
886870_rc	222033	probe	44	116	1/ IVT	933.92	-0.8	0.76	933.92	1.25	1
890004_rc	218053	probe	169	46	1/ IVT	1056.05	1.47	0.93	720.39	0.68	0
AB007923.2	112566	probe	174	8	1/ IVT	1757.91	1.76	1.55	997.48	0.57	0
AB011137.2	102999	probe	233	136	1/ IVT	155.3	-0.77	0.14	155.3	1.31	1
AB039791.1	117084	probe	144	13	1/ IVT	406.67	2.78	0.36	146.06	0.36	0
AB065461.1_CDS_1	120715	probe	109	143	1/ IVT	1403.44	7.8	1.14	179.85	0.13	0
AF050199.1	106630	probe	107	87	1/ IVT	955.1	-1.23	0.78	955.1	0.81	1
AF067801.1	147245	probe	45	143	1/ IVT	784.34	1.29	0.64	609.47	0.78	0
AF075027.1	170698	probe	214	35	1/ IVT	135.76	1.06	0.12	127.83	0.94	0
AF088032.1	164432	probe	179	157	1/ IVT	182995	96.42	161.55	1897.84	0.04	0
AF113685.1	171597	probe	138	63	1/ IVT	672.48	4.66	0.59	144.33	0.22	0
AF116678.1	158384	probe	182	138	1/ IVT	324.57	3.93	0.29	82.62	0.26	0
AF119867.1	219202	probe	229	86	1/ IVT	174.68	2.06	0.15	84.61	0.49	0
AF147791.1	152249	probe	66	159	1/ IVT	507.96	4	0.41	127.04	0.25	0
AF172328.1	230894	probe	25	42	1/ IVT	1536.01	6.38	1.25	240.87	0.16	0
AF208161.1	133672	probe	106	133	1/ IVT	5726.21	35.68	4.67	160.48	0.05	0
AF359415.1	541732	probe	95	9	1/ IVT	309.88	-0.6	0.25	309.88	1.65	1
AF386395.1_CDS_1	186191	probe	37	59	1/ IVT	485.37	2.15	0.4	225.43	0.47	0
AF452719.1	122983	probe	114	89	1/ IVT	2555.23	2.43	2.08	1050.71	0.41	0
AF504647.1	229439	probe	141	8	1/ IVT	126.26	-0.86	0.11	126.26	1.16	1
AJ406951.1	112285	probe	155	34	1/ IVT	370.08	-0.44	0.33	370.08	2.28	1
AJ426174.1_CDS_1	123046	probe	2	58	1/ IVT	386.86	3.02	0.32	127.98	0.33	0
AK000053.1	591390	probe	213	108	1/ IVT	1191.86	5.1	1.05	233.76	0.2	0
AK021848.1	110704	probe	69	130	1/ IVT	7874.31	44.41	6.42	177.29	0.04	0
AK021851.1	158011	probe	123	30	1/ IVT	118	-0.37	0.1	118	2.7	1
AK022407.1	146305	probe	77	55	1/ IVT	1119.94	6.66	0.91	168.24	0.15	0
AK022411.1	693700	probe	88	69	1/ IVT	147.2	0.21	0.12	147.2	4.7	1
AK022550.1	167382	probe	66	102	1/ IVT	1575.54	6.57	1.29	239.77	0.16	0
AK022914.1	108534	probe	153	29	1/ IVT	154.13	0.76	0.14	154.13	1.32	1
AK023343.1	232650	probe	215	58	1/ IVT	76.24	0.79	0.07	76.24	1.27	1
AK023628.1	123404	probe	17	56	1/ IVT	364.77	2.78	0.3	131.12	0.36	0
AK023769.1	231505	probe	228	101	1/ IVT	455.39	2.8	0.4	162.64	0.36	0
AK024448.1	152248	probe	166	108	1/ IVT	906.68	0.27	0.8	906.68	3.72	1
AK026947.1	229049	probe	204	159	1/ IVT	851.44	7.39	0.75	115.2	0.14	0
AK026965.1	208561	probe	236	144	1/ IVT	285.24	0.45	0.25	285.24	2.24	1
AK027667.1	127648	probe	234	67	1/ IVT	14256.6	48.91	12.59	291.5	0.04	0
AK055306.1	223892	probe	174	48	1/ IVT	156.86	1.18	0.14	133.43	0.85	0
AK055503.1	230114	probe	203	119	1/ IVT	2639.24	13.49	2.33	195.69	0.08	0
AK055619.1	229178	probe	82	33	1/ IVT	37406.4	65.55	30.51	570.66	0.04	0
AK057355.1	233508	probe	221	9	1/ IVT	318.88	4.2	0.28	75.93	0.24	0
AK075065.1	151787	probe	163	38	1/ IVT	870.36	13.63	0.77	63.83	0.08	0
AK090403.1	140844	probe	86	5	1/ IVT	4658.2	12.88	3.8	361.52	0.09	0
AK090827.1	112366	probe	48	17	1/ IVT	7542.99	41.32	6.15	182.55	0.04	0
AK091254.1	161079	probe	205	125	1/ IVT	1783.87	25.34	1.57	70.39	0.05	0
AK093281.1	157730	probe	182	5	1/ IVT	256.42	-0.28	0.23	256.42	3.52	1
AK094156.1	200572	probe	38	113	1/ IVT	19020.7	48.24	15.51	394.28	0.04	0
AK095183.1	181194	probe	133	59	1/ IVT	2020.21	11.08	1.78	182.4	0.1	0
AK096715.1	178423	probe	15	70	1/ IVT	19474.3	53.24	15.88	365.8	0.04	0
AK097768.1	231835	probe	206	159	1/ IVT	2988.86	18.46	2.64	161.88	0.07	0
AK097814.1	229808	probe	219	132	1/ IVT	3514.59	16.31	3.1	215.49	0.07	64
AK098143.1	229721	probe	123	109	1/ IVT	181.92	1.23	0.16	147.4	0.81	0
AK123974.1	175244	probe	21	73	1/ IVT	1993.84	12.44	1.63	160.26	0.09	0
AK125429.1	141197	probe	131	72	1/ IVT	13684.5	26.14	12.08	523.49	0.05	0
AK126659.1	232265	probe	78	155	1/ IVT	720.55	-1.21	0.59	720.55	0.83	1
AK127225.1	230441	probe	73	31	1/ IVT	1071.5	5.24	0.87	204.5	0.19	64
AK128346.1	149747	probe	182	83	1/ IVT	110.87	1.1	0.1	100.53	0.91	0
AK128780.1	216448	probe	44	36	1/ IVT	13213.9	37.01	10.78	357.06	0.04	0
AK128780.1	188191	probe	63	69	1/ IVT	15540	12.14	12.68	1279.65	0.09	0
AK130864.1	212871	probe	212	146	1/ IVT	2512.6	5.51	2.22	456.33	0.19	0
AK131040.1	150185	probe	118	122	1/ IVT	3359.23	17.04	2.74	197.12	0.07	0
AL049239.1	165038	probe	11	73	1/ IVT	10448.2	3.72	8.52	2810.82	0.27	0
AL049737.4_CDS_1	237004	probe	218	110	1/ IVT	18000.5	56.65	15.89	317.77	0.04	0
AL117445.1	174074	probe	221	73	1/ IVT	126.51	-1.76	0.11	126.51	0.57	1
AL137259.1	171600	probe	4	54	1/ IVT	184.1	0.3	0.15	184.1	3.38	1
AL137259.1	149923	probe	187	34	1/ IVT	23378.6	58.47	20.64	399.85	0.04	0
AL359572.1	231578	probe	112	105	1/ IVT	452.96	-1.39	0.37	452.96	0.72	1
AL832553.1	230804	probe	178	126	1/ IVT	1378.48	5.15	1.22	267.66	0.2	0
AL833358.1	173391	probe	10	139	1/ IVT	12944.8	45.41	10.56	285.04	0.04	0
AL834281.1	710345	probe	232	43	1/ IVT	869.72	4.21	0.77	206.4	0.24	0
AX657516.1_CDS_1	148980	probe	150	133	1/ IVT	217.26	2.94	0.19	73.92	0.34	0
AX659335.1_CDS_1	199376	probe	73	9	1/ IVT	471.89	-0.81	0.38	471.89	1.23	1
AX747211.1	168964	probe	98	18	1/ IVT	31073.7	3.65	25.35	8519.44	0.28	0
AX805779.1	228597	probe	182	93	1/ IVT	195.93	0.75	0.17	195.93	1.34	1
AX876161.1_CDS_1	114704	probe	74	42	1/ IVT	307.67	0.17	0.25	307.67	5.9	1
AY026949.1	540864	probe	122	126	1/ IVT	1879.99	2.33	1.66	807.8	0.43	0
AY159812.1	237442	probe	57	48	1/ IVT	244.72	-0.14	0.2	244.72	7.28	1
AY320844.1_CDS_1	155556	probe	123	113	1/ IVT	381.3	3.6	0.34	106.05	0.28	0
AY320858.1_CDS_1	199935	probe	16	18	1/ IVT	200.98	0.87	0.16	200.98	1.15	1
AY341949.1	143263	probe	138	78	1/ IVT	2841.92	15.36	2.51	185	0.08	0
AY423226.1	185626	probe	29	5	1/ IVT	716.71	4.58	0.58	156.63	0.22	0
BC002659.1	150332	probe	199	53	1/ IVT	3451.63	10.75	3.05	321.16	0.1	0
BC002816.2	163227	probe	104	114	1/ IVT	990.35	5.18	0.81	191.22	0.2	0
BC006164.1	214368	probe	189	124	1/ IVT	340.02	0.33	0.3	340.02	3.04	1
BC009633.1	191363	probe	164	109	1/ IVT	3248.13	14.15	2.87	229.61	0.08	0
BC009864.2	217808	probe	172	69	1/ IVT	231.14	1.55	0.2	149.48	0.65	64
BC010081.2	217769	probe	33	154	1/ IVT	1423.76	9.8	1.16	145.23	0.11	0
BC010081.2	234537	probe	113	125	1/ IVT	818.14	11.15	0.67	73.4	0.1	0
BC010426.1	233476	probe	176	121	1/ IVT	340.97	-0.12	0.3	340.97	8.1	1
BC013171.1	205074	probe	70	39	1/ IVT	100072	93.75	81.62	1067.45	0.04	0
BC014198.2	702618	probe	13	28	1/ IVT	626.97	0.38	0.51	626.97	2.64	1
BC015870.1	237080	probe	112	64	1/ IVT	12192.4	61.41	9.94	198.56	0.04	0
BC019703.1	235277	probe	68	144	1/ IVT	189.04	1.65	0.15	114.36	0.61	0
BC019703.1	218771	probe	231	8	1/ IVT	1177.47	0.68	1.04	1177.47	1.46	1
BC019830.1	221589	probe	197	1	1/ IVT	503.87	1.33	0.44	377.81	0.75	0
BC022832.1	149228	probe	23	69	1/ IVT	3730.34	28.5	3.04	130.89	0.05	0
BC023516.2	138399	probe	114	98	1/ IVT	11139.3	54.03	9.09	206.17	0.04	0
BC027954.1	169714	probe	169	123	1/ IVT	203.85	-0.56	0.18	203.85	1.79	1
BC030984.1	209080	probe	213	6	1/ IVT	10151.4	30.88	8.96	328.73	0.05	0
BC036040.1	233577	probe	98	144	1/ IVT	206.89	-1.17	0.17	206.89	0.85	1
BC036263.1	129786	probe	56	131	1/ IVT	2555.3	13.5	2.08	189.22	0.08	0
BC039180.1	179699	probe	46	9	1/ IVT	449.31	0.86	0.37	449.31	1.16	1
BC039457.1	163740	probe	96	32	1/ IVT	32518.9	40.17	26.52	809.53	0.04	0
BC040855.1	189048	probe	46	64	1/ IVT	3189.74	8.97	2.6	355.42	0.12	0
BC041879.1	156670	probe	112	98	1/ IVT	2095.44	12.5	1.71	167.65	0.09	0
BC043192.1	102944	probe	168	78	1/ IVT	1359.81	9.65	1.2	140.85	0.11	0
BC043273.2	167179	probe	43	113	1/ IVT	221.35	-0.88	0.18	221.35	1.13	1
BC045725.1	458096	probe	233	76	1/ IVT	1442.73	10.08	1.27	143.11	0.11	0
BC046344.1	235757	probe	110	47	1/ IVT	7882.5	27.75	6.43	284.09	0.05	0
BC047332.1	171151	probe	210	15	1/ IVT	7377.51	39.92	6.51	184.79	0.05	0
BC047459.1	118843	probe	3	69	1/ IVT	750.47	8.54	0.61	87.83	0.12	0
BC051727.1	312761	probe	47	145	1/ IVT	255.82	0.56	0.21	255.82	1.79	1
BC053887.1	185605	probe	42	9	1/ IVT	413.69	0.5	0.34	413.69	1.99	1
BC061590.1	214852	probe	103	87	1/ IVT	22591.4	56.17	18.43	402.22	0.04	0
BC062579.1	173890	probe	162	156	1/ IVT	7317.58	28.56	6.46	256.25	0.05	0
BC063035.1	177707	probe	112	83	1/ IVT	2895.21	10.34	2.36	280.14	0.1	0
BC065757.1	101695	probe	206	26	1/ IVT	34.73	-1.49	0.03	34.73	0.67	1
BC071855.1	145023	probe	88	42	1/ IVT	5361.12	22.51	4.37	238.14	0.06	64
BX538005.1	163580	probe	47	16	1/ IVT	5690.78	37.01	4.64	153.75	0.04	0
BX641014.1	132210	probe	25	93	1/ IVT	784.37	8.01	0.64	97.88	0.13	0
BX647680.1	164511	probe	10	23	1/ IVT	1831.84	8.49	1.49	215.78	0.12	0
BX647826.1	200991	probe	52	90	1/ IVT	641.49	1.14	0.52	561.5	0.88	0
BX647826.1	101527	probe	197	158	1/ IVT	2233.52	19.48	1.97	114.65	0.06	0
ENST00000288168	137436	probe	38	12	1/ IVT	12776.5	46.75	10.42	273.32	0.04	0
ENST00000293094	232046	probe	5	36	1/ IVT	252.16	-1.43	0.21	252.16	0.7	1
ENST00000304870	189707	probe	24	138	1/ IVT	572384	66.92	466.87	8553.48	0.04	0
ENST00000320505	106007	probe	90	96	1/ IVT	205601	33.51	167.7	6135.2	0.05	0
ENST00000320863	236151	probe	130	52	1/ IVT	3779.6	29.19	3.34	129.48	0.05	0
ENST00000326308	100914	probe	106	129	1/ IVT	39811.4	36.5	32.47	1090.86	0.04	0
ENST00000326875	128737	probe	197	112	1/ IVT	1.43192e+06	106.98	1264.1	13384.9	0.04	0
ENST00000332544	129147	probe	198	79	1/ IVT	4224.68	40.57	3.73	104.14	0.05	0
ENST00000338600	157015	probe	184	76	1/ IVT	2166.08	15.39	1.91	140.7	0.08	0
ENST00000340259	200688	probe	14	107	1/ IVT	764.17	5.32	0.62	143.53	0.19	0
ENST00000340267	129708	probe	47	139	1/ IVT	695294	86.6	567.12	8028.74	0.04	0
ENST00000340878	185320	probe	163	134	1/ IVT	378.24	5.12	0.33	73.93	0.2	64
ENST00000342859	161087	probe	235	115	1/ IVT	306107	97.87	270.23	3127.85	0.04	0
ENST00000344368	185819	probe	34	136	1/ IVT	7859.44	28.42	6.41	276.57	0.05	0
hCG14576.3	152113	probe	177	152	1/ IVT	440.37	0.75	0.39	440.37	1.33	1
hCG14577.2	209022	probe	164	28	1/ IVT	148.89	1.5	0.13	99.02	0.67	0
hCG14584.3	146228	probe	126	94	1/ IVT	190.62	-0.19	0.17	190.62	5.22	1
hCG14596.3	148303	probe	53	71	1/ IVT	35982.2	71.19	29.35	505.47	0.04	0
hCG14597.2	198904	probe	196	61	1/ IVT	141.75	1.03	0.13	137.27	0.97	0
hCG14600.3	109956	probe	197	150	1/ IVT	5840.5	29.51	5.16	197.94	0.05	0
hCG14602.2	118423	probe	43	79	1/ IVT	26646.5	86.1	21.73	309.48	0.04	0
hCG14603.2	108808	probe	171	10	1/ IVT	200.85	1.64	0.18	122.6	0.61	0
hCG14605.3	132503	probe	45	96	1/ IVT	154.16	1.29	0.13	119.93	0.78	0
hCG14606.3	150130	probe	179	129	1/ IVT	99.23	-2.47	0.09	99.23	0.41	1
hCG14609.3	169226	probe	132	52	1/ IVT	674043	70.05	595.05	9622.48	0.04	0
hCG14612.3	137064	probe	185	152	1/ IVT	3456.69	23.06	3.05	149.88	0.06	0
hCG14613.3	155778	probe	8	127	1/ IVT	71678.5	69.42	58.46	1032.53	0.04	0
hCG14613.3	140164	probe	73	109	1/ IVT	460816	98.05	375.87	4699.66	0.04	0
hCG14614.4	203620	probe	169	117	1/ IVT	40873.5	71.22	36.08	573.9	0.04	0
hCG14617.2	187514	probe	72	141	1/ IVT	5517.08	28.6	4.5	192.9	0.05	0
hCG14618.3	139986	probe	30	78	1/ IVT	679.1	4.66	0.55	145.77	0.22	0
hCG14619.3	103547	probe	135	151	1/ IVT	154.58	0.09	0.14	154.58	11.07	1
hCG14620.4	102783	probe	166	16	1/ IVT	15459.3	45.57	13.65	339.23	0.04	0
hCG14621.2	110071	probe	115	142	1/ IVT	154.29	-0.78	0.13	154.29	1.28	1
hCG14621.2	136201	probe	185	105	1/ IVT	137.77	0.76	0.12	137.77	1.32	1
hCG14623.2	183774	probe	55	146	1/ IVT	124.29	-0.83	0.1	124.29	1.21	1
hCG14632.3	111529	probe	194	141	1/ IVT	12335	50.83	10.89	242.65	0.04	0
hCG14633.2	188439	probe	228	63	1/ IVT	5059.72	31.91	4.47	158.59	0.05	0
hCG14634.2	172361	probe	52	23	1/ IVT	229.66	-0.15	0.19	229.66	6.5	1
hCG14635.2	174790	probe	61	148	1/ IVT	1022.5	-0.67	0.83	1022.5	1.49	1
hCG14638.4	228467	probe	82	105	1/ IVT	329364	70.61	268.65	4664.36	0.04	0
hCG14640.2	117604	probe	209	118	1/ IVT	11872	61.92	10.48	191.74	0.04	0
hCG14641.2	169324	probe	41	17	1/ IVT	460.95	3.61	0.38	127.73	0.28	0
hCG14644.2	173909	probe	174	125	1/ IVT	93357.5	116.5	82.42	801.34	0.04	64
hCG14645.3	172114	probe	99	54	1/ IVT	339.9	1.39	0.28	244.25	0.72	0
hCG14649.2	207050	probe	133	143	1/ IVT	175.18	-0.3	0.15	175.18	3.34	1
hCG14653.2	201675	probe	14	114	1/ IVT	404.72	1.96	0.33	206.82	0.51	0
hCG14659.3	234521	probe	83	84	1/ IVT	90105	33.75	73.49	2669.84	0.05	0
hCG14660.3	191794	probe	13	41	1/ IVT	34205.7	49.29	27.9	693.93	0.04	0
hCG14664.2	130350	probe	76	44	1/ IVT	253.39	0.92	0.21	253.39	1.09	1
hCG14667.2	170254	probe	85	113	1/ IVT	322.95	-0.66	0.26	322.95	1.52	1
hCG14669.3	212190	probe	97	116	1/ IVT	7002.09	20.74	5.71	337.64	0.06	0
hCG14672.3	218394	probe	9	134	1/ IVT	1034.25	0.18	0.84	1034.25	5.55	1
hCG14672.3	123272	probe	178	33	1/ IVT	10511.4	54.76	9.28	191.96	0.04	0
hCG14673.4	143862	probe	163	82	1/ IVT	6354.89	60.12	5.61	105.71	0.04	0
hCG14674.5	227246	probe	32	6	1/ IVT	23482.2	46.07	19.15	509.73	0.04	0
hCG14674.5	199582	probe	50	11	1/ IVT	13643	43.1	11.13	316.52	0.04	0
hCG14677.2	170090	probe	228	41	1/ IVT	13815	40.03	12.2	345.12	0.05	0
hCG14678.2	234387	probe	188	115	1/ IVT	15820.9	53.75	13.97	294.33	0.04	0
hCG14689.3	212787	probe	32	146	1/ IVT	31314	67.92	25.54	461.03	0.04	0
hCG14690.3	119847	probe	11	53	1/ IVT	2288.13	8.56	1.87	267.39	0.12	0
hCG14691.3	142626	probe	58	13	1/ IVT	70141.8	64.67	57.21	1084.64	0.04	0
hCG14691.3	226488	probe	177	125	1/ IVT	7344.34	46.37	6.48	158.4	0.04	0
hCG14693.4	204612	probe	28	5	1/ IVT	670.35	13.41	0.55	49.99	0.08	0
hCG14693.4	192630	probe	87	3	1/ IVT	380.48	-0.39	0.31	380.48	2.6	1
hCG14694.2	161075	probe	146	31	1/ IVT	241.82	-0.9	0.21	241.82	1.11	1
hCG14696.4	218651	probe	28	55	1/ IVT	1035.6	2.42	0.84	427.07	0.41	0
hCG14696.4	156333	probe	83	109	1/ IVT	1204.34	17.09	0.98	70.46	0.07	0
hCG14696.4	218455	probe	151	138	1/ IVT	228.18	0.25	0.2	228.18	4.06	1
hCG14697.3	158495	probe	32	101	1/ IVT	20702.4	72.27	16.89	286.47	0.04	0
hCG14700.4	110562	probe	232	124	1/ IVT	24861.3	61.99	21.95	401.05	0.04	0
hCG14702.4	143954	probe	156	24	1/ IVT	9279.33	66.37	8.19	139.81	0.04	0
hCG14704.3	147355	probe	104	141	1/ IVT	4527.5	24.34	3.69	186	0.05	0
hCG14709.3	208898	probe	52	106	1/ IVT	3367.55	7.82	2.75	430.67	0.13	0
hCG14713.2	220032	probe	34	7	1/ IVT	2408.14	5.57	1.96	432.27	0.18	0
hCG14713.2	124173	probe	103	91	1/ IVT	3387.84	25.51	2.76	132.81	0.05	0
hCG14715.3	185108	probe	76	34	1/ IVT	9807.77	18.21	8	538.63	0.07	0
hCG14716.2	141862	probe	144	57	1/ IVT	28034.2	49.19	24.75	569.87	0.04	0
hCG14722.3	217334	probe	135	76	1/ IVT	1984.1	7.62	1.75	260.54	0.14	0
hCG14722.3	201256	probe	138	158	1/ IVT	229.78	1.23	0.2	187.57	0.82	0
hCG14729.3	105991	probe	138	28	1/ IVT	348.71	-1.88	0.31	348.71	0.53	1
hCG14731.3	102968	probe	31	75	1/ IVT	1980.01	6.29	1.62	314.86	0.16	64
hCG14731.3	225704	probe	233	58	1/ IVT	6920.01	58.16	6.11	118.98	0.04	0
hCG14741.3	150470	probe	25	45	1/ IVT	400.22	2.04	0.33	196.33	0.49	0
hCG14741.3	148630	probe	47	151	1/ IVT	135	1.11	0.11	121.33	0.9	0
hCG14742.2	207176	probe	152	43	1/ IVT	6967.94	32.4	6.15	215.08	0.05	0
hCG14744.3	202286	probe	85	88	1/ IVT	6097.75	20.67	4.97	295	0.06	0
hCG14746.3	160951	probe	175	75	1/ IVT	74503.4	107.05	65.77	696	0.04	0
hCG14748.2	130493	probe	202	39	1/ IVT	22862	59.56	20.18	383.85	0.04	0
hCG14749.3	181822	probe	196	152	1/ IVT	301.16	4.03	0.27	74.76	0.25	0
hCG14750.3	195779	probe	121	11	1/ IVT	389.13	3.91	0.34	99.43	0.26	0
hCG14752.2	191248	probe	49	93	1/ IVT	486.5	0.42	0.4	486.5	2.41	1
hCG14753.3	115349	probe	86	97	1/ IVT	7088.24	25.46	5.78	278.45	0.05	0
hCG14753.3	205525	probe	235	61	1/ IVT	19013.2	45.31	16.78	419.65	0.04	0
hCG14759.4	209820	probe	15	5	1/ IVT	272.91	0.24	0.22	272.91	4.21	1
hCG14763.4	108463	probe	105	11	1/ IVT	3199.89	23.46	2.61	136.39	0.06	0
hCG14764.2	126350	probe	83	89	1/ IVT	2514.74	5.17	2.05	486.33	0.2	0
hCG14765.2	125747	probe	118	30	1/ IVT	1901.58	16.59	1.55	114.61	0.07	0
hCG14767.3	123436	probe	216	52	1/ IVT	231.84	1.53	0.2	151.94	0.66	0
hCG14769.3	187792	probe	115	85	1/ IVT	172.83	0.54	0.14	172.83	1.86	1
hCG14777.3	202437	probe	142	106	1/ IVT	2619.42	16.97	2.31	154.36	0.07	0
hCG14778.2	168384	probe	57	130	1/ IVT	4061.19	26.3	3.31	154.42	0.05	0
hCG14780.3	227404	probe	90	59	1/ IVT	452.55	4.26	0.37	106.29	0.24	0
hCG14780.3	173071	probe	125	67	1/ IVT	25110.2	41.84	22.17	600.1	0.05	0
hCG14780.3	223108	probe	149	154	1/ IVT	199.09	0.33	0.18	199.09	3	1
hCG14780.3	118944	probe	158	152	1/ IVT	2057.74	8.65	1.82	237.91	0.12	0
hCG14782.3	120804	probe	232	97	1/ IVT	2952.03	33.76	2.61	87.43	0.05	0
hCG14785.3	191146	probe	171	137	1/ IVT	780.16	1.15	0.69	675.95	0.87	0
hCG14790.3	202882	probe	45	75	1/ IVT	254.39	-0.04	0.21	254.39	25.57	1
hCG14791.3	103752	probe	11	75	1/ IVT	16304.2	79.31	13.3	205.59	0.04	0
hCG14791.3	218954	probe	166	114	1/ IVT	2765.44	16.01	2.44	172.78	0.07	0
hCG14793.3	190614	probe	122	31	1/ IVT	29994.1	63.11	26.48	475.25	0.04	0
hCG14799.3	194399	probe	158	103	1/ IVT	4290.95	23.83	3.79	180.04	0.06	0
hCG14802.2	221617	probe	28	75	1/ IVT	5095.34	9.08	4.16	561.1	0.12	0
hCG14802.2	129445	probe	34	113	1/ IVT	66483.8	80.24	54.23	828.56	0.04	0
hCG14802.2	104683	probe	70	47	1/ IVT	130715	110.08	106.62	1187.44	0.04	64
hCG14804.3	196546	probe	192	139	1/ IVT	396.53	4.91	0.35	80.79	0.21	0
hCG14806.3	130652	probe	145	123	1/ IVT	89136.6	71.75	78.69	1242.31	0.04	0
hCG14809.2	130161	probe	6	21	1/ IVT	18096.8	65.31	14.76	277.1	0.04	0
hCG14816.3	164637	probe	238	88	1/ IVT	3677.73	11.91	3.25	308.89	0.09	0
hCG14817.5	104054	probe	129	62	1/ IVT	32058.1	80.14	28.3	400.05	0.04	0
hCG14819.2	202789	probe	178	61	1/ IVT	117.52	0.01	0.1	117.52	87.23	1
hCG14822.3	173748	probe	224	26	1/ IVT	77076.6	98.77	68.04	780.35	0.04	0
hCG14827.2	182075	probe	166	28	1/ IVT	20749.3	66.03	18.32	314.25	0.04	0
hCG14830.3	154060	probe	47	75	1/ IVT	109.9	0.46	0.09	109.9	2.17	1
hCG14830.3	121829	probe	63	159	1/ IVT	122.3	0.79	0.1	122.3	1.27	1
hCG14832.3	193786	probe	95	50	1/ IVT	17438.1	26.28	14.22	663.61	0.05	0
hCG14833.3	153369	probe	158	67	1/ IVT	1865.69	8.73	1.65	213.71	0.12	0
hCG14834.3	171124	probe	58	93	1/ IVT	190.25	-0.48	0.16	190.25	2.07	1
hCG14835.3	177517	probe	65	132	1/ IVT	166.07	0.34	0.14	166.07	2.94	1
hCG14838.2	104531	probe	102	73	1/ IVT	141.91	-1.29	0.12	141.91	0.78	1
hCG14841.3	133100	probe	19	12	1/ IVT	4153.02	18.81	3.39	220.77	0.06	0
hCG14844.3	204967	probe	206	28	1/ IVT	145.15	-0.3	0.13	145.15	3.28	1
hCG14845.4	186150	probe	189	11	1/ IVT	35723.9	28.53	31.54	1252.02	0.05	0
hCG14846.3	204492	probe	203	63	1/ IVT	24558.9	60.97	21.68	402.77	0.04	0
hCG14846.3	216320	probe	209	22	1/ IVT	29595.9	46.89	26.13	631.16	0.04	0
hCG14847.3	198202	probe	209	46	1/ IVT	44232.4	43.33	39.05	1020.71	0.04	0
hCG14851.3	162225	probe	204	1	1/ IVT	706.23	1.63	0.62	432.56	0.61	0
hCG14854.2	167237	probe	111	87	1/ IVT	5293.36	15.51	4.32	341.33	0.07	0
hCG14854.2	228828	probe	113	99	1/ IVT	134.19	-1.04	0.11	134.19	0.97	1
hCG14855.3	188340	probe	98	117	1/ IVT	19310.6	40.27	15.75	479.51	0.04	0
hCG14859.2	118915	probe	72	102	1/ IVT	12111.5	49	9.88	247.18	0.04	0
hCG14860.3	195028	probe	135	24	1/ IVT	121.58	-1.03	0.11	121.58	0.98	1
hCG14867.3	105152	probe	190	64	1/ IVT	171.18	1.37	0.15	124.66	0.73	0
hCG14868.3	236864	probe	34	3	1/ IVT	52641.7	92.48	42.94	569.2	0.04	0
hCG14869.3	216283	probe	139	16	1/ IVT	74295.5	27.07	65.59	2744.53	0.05	0
hCG14870.4	211315	probe	209	133	1/ IVT	245.67	0.8	0.22	245.67	1.24	1
hCG14873.3	130933	probe	34	39	1/ IVT	89.6	0.09	0.07	89.6	11.19	1
hCG14874.3	204252	probe	227	62	1/ IVT	24287.1	48.43	21.44	501.46	0.04	0
hCG14878.3	187450	probe	26	76	1/ IVT	2835.33	1.54	2.31	1843.85	0.65	0
hCG14879.2	180233	probe	98	118	1/ IVT	149468	52.33	121.91	2856.03	0.04	0
hCG14880.2	149216	probe	135	138	1/ IVT	80.75	-2.11	0.07	80.75	0.48	1
hCG14882.3	139262	probe	22	89	1/ IVT	171463	122.13	139.85	1403.9	0.04	64
hCG14883.2	195525	probe	10	74	1/ IVT	13462	17.44	10.98	771.99	0.07	0
hCG14884.5	188985	probe	46	4	1/ IVT	766.37	2.12	0.63	362.16	0.47	0
hCG14889.1	178122	probe	115	121	1/ IVT	1121.1	5.92	0.91	189.27	0.17	0
hCG14891.3	104667	probe	127	121	1/ IVT	7355.98	19.89	6.49	369.77	0.06	0
hCG14894.2	202506	probe	154	92	1/ IVT	215.25	-0.9	0.19	215.25	1.11	1
hCG14905.4	210232	probe	37	93	1/ IVT	221.53	-1.18	0.18	221.53	0.85	1
hCG14906.4	113157	probe	92	1	1/ IVT	2572.47	14.44	2.1	178.2	0.08	0
hCG14908.2	100777	probe	23	13	1/ IVT	40459.7	86.74	33	466.44	0.04	0
hCG14909.2	103999	probe	139	38	1/ IVT	155138	97.13	136.96	1597.16	0.04	0
hCG14910.3	156272	probe	28	50	1/ IVT	19867.6	73.53	16.21	270.22	0.04	0
hCG14913.3	136439	probe	42	122	1/ IVT	703.85	2.64	0.57	266.31	0.38	0
hCG14914.3	140473	probe	65	49	1/ IVT	4153.46	4.61	3.39	900.95	0.22	0
hCG14915.3	216623	probe	177	46	1/ IVT	16874.9	59.63	14.9	282.98	0.04	0
hCG14916.3	177518	probe	185	29	1/ IVT	39516.6	94.5	34.89	418.15	0.04	0
hCG14916.3	211045	probe	210	151	1/ IVT	44188.6	64.06	39.01	689.8	0.04	0
hCG14917.2	128885	probe	66	37	1/ IVT	5398.35	45.14	4.4	119.6	0.04	0
hCG14917.2	206130	probe	224	64	1/ IVT	8817.17	28.13	7.78	313.43	0.05	0
hCG14919.3	130772	probe	232	34	1/ IVT	262632	110.21	231.85	2383.02	0.04	0
hCG14921.2	210392	probe	107	138	1/ IVT	2684.51	4.03	2.19	665.63	0.25	0
hCG14922.3	157895	probe	41	76	1/ IVT	10688.6	31.99	8.72	334.15	0.05	0
hCG14925.4	175901	probe	14	7	1/ IVT	1247.68	2.07	1.02	603.69	0.49	0
hCG14926.4	221562	probe	88	72	1/ IVT	161719	43.51	131.91	3717.06	0.04	0
hCG14926.4	106774	probe	156	30	1/ IVT	221990	81.03	195.97	2739.53	0.04	0
hCG14926.4	148548	probe	238	144	1/ IVT	258754	65.77	228.43	3934.05	0.04	0
hCG14927.3	227114	probe	131	109	1/ IVT	150.85	2.5	0.13	60.4	0.4	64
hCG14928.4	102234	probe	159	50	1/ IVT	150.2	1.92	0.13	78.27	0.52	0
hCG14929.3	132658	probe	27	89	1/ IVT	70792.5	116.99	57.74	605.11	0.04	64
hCG14930.3	156705	probe	26	26	1/ IVT	108.52	0.68	0.09	108.52	1.47	1
hCG14932.4	233803	probe	142	111	1/ IVT	23043.6	55.4	20.34	415.97	0.04	0
hCG14933.2	160273	probe	29	17	1/ IVT	2028.42	18.22	1.65	111.31	0.07	0
hCG14941.3	108345	probe	6	116	1/ IVT	1515.21	14.6	1.24	103.81	0.08	0
hCG14944.2	169776	probe	144	105	1/ IVT	14331.9	52.51	12.65	272.92	0.04	0
hCG14946.2	171458	probe	186	113	1/ IVT	38.51	0.01	0.03	38.51	135.59	1
hCG14948.5	102454	probe	48	95	1/ IVT	10118.7	21.81	8.25	464.03	0.06	0
hCG14950.3	107652	probe	141	147	1/ IVT	22068.9	54.05	19.48	408.28	0.04	0
hCG14958.3	108059	probe	18	29	1/ IVT	11188.2	58.58	9.13	191	0.04	0
hCG14959.4	167643	probe	55	54	1/ IVT	22934.1	69.59	18.71	329.57	0.04	0
hCG14960.2	167128	probe	171	109	1/ IVT	582.22	3.12	0.51	186.37	0.32	0
hCG14961.2	181182	probe	136	92	1/ IVT	1597.54	0.91	1.41	1597.54	1.1	1
hCG14965.2	162210	probe	239	138	1/ IVT	278.26	-0.07	0.25	278.26	14.14	1
hCG14966.2	100064	probe	172	116	1/ IVT	158.03	-0.68	0.14	158.03	1.47	1
hCG14967.4	139377	probe	171	44	1/ IVT	315.5	2.32	0.28	136.12	0.43	0
hCG14971.3	178162	probe	21	127	1/ IVT	384.77	3.34	0.31	115.36	0.3	0
hCG14977.3	159086	probe	81	24	1/ IVT	6006.1	30.88	4.9	194.51	0.05	0
hCG14981.3	194900	probe	19	109	1/ IVT	6110.02	27.77	4.98	220	0.05	0
hCG14983.3	225552	probe	126	106	1/ IVT	9799.15	36.63	8.65	267.5	0.05	0
hCG14983.3	126513	probe	213	58	1/ IVT	609.05	2.04	0.54	298.42	0.49	0
hCG14991.2	187241	probe	47	26	1/ IVT	1738.53	0.35	1.42	1738.53	2.83	1
hCG14993.3	138581	probe	77	113	1/ IVT	4287.66	4.5	3.5	953.64	0.23	0
hCG14996.4	115785	probe	139	76	1/ IVT	1.14916e+06	91.08	1014.48	12616.5	0.04	0
hCG14997.4	205933	probe	191	48	1/ IVT	10159.2	46.99	8.97	216.18	0.04	0
hCG14998.3	143936	probe	50	85	1/ IVT	529.89	-0.07	0.43	529.89	13.66	1
hCG14999.2	187086	probe	55	32	1/ IVT	180.69	0.71	0.15	180.69	1.4	1
hCG15000.3	156020	probe	11	52	1/ IVT	9317.12	9.07	7.6	1027.63	0.12	0
hCG15003.2	151138	probe	62	37	1/ IVT	479.72	3.32	0.39	144.37	0.3	0
hCG15009.2	104402	probe	48	113	1/ IVT	13204.4	46.5	10.77	283.98	0.04	0
hCG15009.2	125028	probe	217	22	1/ IVT	7398.87	32.68	6.53	226.38	0.05	0
hCG15010.3	175201	probe	226	102	1/ IVT	2372.91	24.66	2.09	96.21	0.06	0
hCG15011.4	103115	probe	25	118	1/ IVT	350.65	2.52	0.29	139.06	0.4	0
hCG15016.3	211942	probe	230	123	1/ IVT	29609	40.63	26.14	728.74	0.05	0
hCG15017.3	192036	probe	198	113	1/ IVT	3926.03	11.6	3.47	338.45	0.09	0
hCG15018.5	185093	probe	36	126	1/ IVT	2749.19	13.18	2.24	208.53	0.08	0
hCG15018.5	155786	probe	57	65	1/ IVT	7559.48	35.23	6.17	214.58	0.05	0
hCG15018.5	170287	probe	145	155	1/ IVT	18075.6	24.76	15.96	729.99	0.06	0
hCG15020.3	153575	probe	14	104	1/ IVT	10936.7	46.64	8.92	234.5	0.04	0
hCG15021.3	176097	probe	151	13	1/ IVT	375.01	2.59	0.33	144.72	0.39	0
hCG15022.3	183711	probe	48	87	1/ IVT	24666.6	34.02	20.12	725.14	0.05	0
hCG15023.2	161767	probe	151	22	1/ IVT	379.08	-0.74	0.33	379.08	1.36	1
hCG15024.3	130435	probe	150	96	1/ IVT	5193.72	34.7	4.59	149.67	0.05	0
hCG15026.2	100572	probe	42	95	1/ IVT	200.04	0.07	0.16	200.04	13.73	1
hCG15028.4	203566	probe	25	47	1/ IVT	29184.6	50.26	23.8	580.62	0.04	0
hCG15029.3	180804	probe	6	126	1/ IVT	78860.6	59.04	64.32	1335.79	0.04	0
hCG15033.3	144765	probe	27	16	1/ IVT	83441.4	98.7	68.06	845.4	0.04	0
hCG15038.4	191841	probe	23	109	1/ IVT	114677	99.35	93.54	1154.29	0.04	0
hCG15038.4	196524	probe	62	157	1/ IVT	5208.89	16.9	4.25	308.22	0.07	0
hCG15039.3	200664	probe	172	149	1/ IVT	1018.21	3.69	0.9	276.03	0.27	0
hCG15041.3	118650	probe	13	94	1/ IVT	2118.37	7.49	1.73	282.94	0.14	0
hCG15042.3	191084	probe	19	111	1/ IVT	175159	105.18	142.87	1665.27	0.04	64
hCG15043.2	191984	probe	207	145	1/ IVT	823.77	8.65	0.73	95.27	0.12	0
hCG15045.3	230474	probe	172	95	1/ IVT	705.27	5.5	0.62	128.24	0.19	0
hCG15046.2	187002	probe	34	125	1/ IVT	20954.5	20.54	17.09	1020.35	0.06	0
hCG15047.3	104525	probe	195	92	1/ IVT	6137.92	20.76	5.42	295.62	0.06	0
hCG15048.2	194837	probe	185	70	1/ IVT	107.47	0.82	0.09	107.47	1.23	1
hCG15050.2	188871	probe	186	136	1/ IVT	22504.2	56.9	19.87	395.52	0.04	0
hCG15053.3	206193	probe	97	29	1/ IVT	186.52	-0.21	0.15	186.52	4.71	1
hCG15053.3	234787	probe	133	68	1/ IVT	347.7	-0.58	0.31	347.7	1.73	1
hCG15053.3	137911	probe	147	1	1/ IVT	2343.38	6.57	2.07	356.53	0.16	0
hCG15054.3	188877	probe	145	86	1/ IVT	3715.43	11.76	3.28	316.05	0.09	0
hCG15057.2	110772	probe	110	19	1/ IVT	1062.5	3.34	0.87	318.27	0.3	0
hCG15059.4	125999	probe	235	108	1/ IVT	616.59	1.32	0.54	466.95	0.76	0
hCG15060.3	233509	probe	208	13	1/ IVT	103869	55.89	91.7	1858.39	0.04	0
hCG15064.2	139600	probe	189	28	1/ IVT	4340.27	24.44	3.83	177.58	0.06	0
hCG15065.1	111056	probe	98	78	1/ IVT	5827.79	17.37	4.75	335.58	0.07	0
hCG15066.1	144333	probe	167	99	1/ IVT	191.96	-1	0.17	191.96	1	1
hCG15066.1	163342	probe	184	37	1/ IVT	337.94	3.16	0.3	106.83	0.32	0
hCG15067.1	176437	probe	189	158	1/ IVT	845.2	1.8	0.75	469.09	0.56	0
hCG15068.3	165166	probe	145	82	1/ IVT	1021.08	0.02	0.9	1021.08	52.31	1
hCG15070.3	191055	probe	201	146	1/ IVT	23238.4	40.27	20.51	577.13	0.05	0
hCG15071.3	145163	probe	143	28	1/ IVT	3137.43	17.46	2.77	179.68	0.07	0
hCG15073.3	166773	probe	111	32	1/ IVT	2983.58	1.64	2.43	1815.79	0.61	0
hCG15077.2	146706	probe	43	9	1/ IVT	1007.15	1.7	0.82	592.27	0.59	0
hCG15077.2	169395	probe	170	106	1/ IVT	12399.2	41.16	10.95	301.27	0.05	0
hCG15079.2	177238	probe	29	81	1/ IVT	644.05	5.31	0.53	121.18	0.19	0
hCG15080.2	213187	probe	57	133	1/ IVT	241213	90.25	196.75	2672.67	0.04	0
hCG15091.3	105615	probe	114	137	1/ IVT	6061.96	23.27	4.94	260.52	0.06	0
hCG15093.2	166248	probe	105	56	1/ IVT	838.15	-0.33	0.68	838.15	3.01	1
hCG15095.2	170355	probe	37	142	1/ IVT	7163.47	29.06	5.84	246.48	0.05	0
hCG15097.4	127767	probe	110	36	1/ IVT	153.12	-2.26	0.12	153.12	0.44	1
hCG15098.4	212217	probe	111	28	1/ IVT	3003.34	23.15	2.45	129.74	0.06	0
hCG15105.2	159394	probe	57	102	1/ IVT	33566.9	62.15	27.38	540.08	0.04	0
hCG15106.3	103273	probe	57	12	1/ IVT	3618.98	18.69	2.95	193.67	0.06	0
hCG15108.4	153496	probe	44	13	1/ IVT	246.93	2.15	0.2	115.1	0.47	0
hCG15109.4	216153	probe	102	86	1/ IVT	317.4	-0.73	0.26	317.4	1.37	1
hCG15110.3	112130	probe	212	122	1/ IVT	1785.31	15.67	1.58	113.96	0.07	0
hCG15119.3	204218	probe	157	147	1/ IVT	1114.12	13.43	0.98	82.94	0.08	0
hCG15121.2	190473	probe	143	97	1/ IVT	268767	72.25	237.27	3719.87	0.04	0
hCG15126.3	194101	probe	201	138	1/ IVT	234.25	1.76	0.21	132.96	0.57	0
hCG15136.3	168908	probe	141	5	1/ IVT	2328.21	14.55	2.06	160	0.08	0
hCG15138.4	108723	probe	105	149	1/ IVT	222.58	0.43	0.18	222.58	2.35	1
hCG15140.4	147011	probe	3	59	1/ IVT	9227.44	44.26	7.53	208.47	0.04	0
hCG15140.4	218515	probe	84	82	1/ IVT	994.05	11.58	0.81	85.87	0.09	0
hCG15153.3	100431	probe	57	25	1/ IVT	4838.48	33.35	3.95	145.08	0.05	0
hCG15154.2	109539	probe	141	129	1/ IVT	10103.6	35.23	8.92	286.8	0.05	0
hCG15158.2	108231	probe	231	108	1/ IVT	35931.3	76.7	31.72	468.46	0.04	0
hCG15160.3	161567	probe	139	58	1/ IVT	1931.96	12.99	1.71	148.76	0.09	0
hCG15162.3	133810	probe	129	75	1/ IVT	115495	102.07	101.96	1131.48	0.04	0
hCG15163.2	199618	probe	178	49	1/ IVT	193.21	0.23	0.17	193.21	4.32	1
hCG15165.2	169278	probe	19	110	1/ IVT	59416.9	89.3	48.46	665.38	0.04	64
hCG15167.3	213516	probe	185	122	1/ IVT	191689	83.55	169.22	2294.33	0.04	0
hCG15168.2	104293	probe	36	124	1/ IVT	12632	29.35	10.3	430.37	0.05	0
hCG15169.2	147933	probe	199	57	1/ IVT	247.93	1.33	0.22	186.4	0.75	0
hCG15170.3	155934	probe	97	3	1/ IVT	1047.37	1.8	0.85	582.19	0.56	0
hCG15171.2	148045	probe	101	106	1/ IVT	278.86	0.56	0.23	278.86	1.79	1
hCG15173.3	153630	probe	121	125	1/ IVT	7181.24	9.48	6.34	757.31	0.11	0
hCG15175.3	103729	probe	42	144	1/ IVT	664.71	2.56	0.54	259.95	0.39	0
hCG15176.2	145835	probe	103	158	1/ IVT	2663.28	10.55	2.17	252.5	0.1	0
hCG15177.2	109949	probe	188	83	1/ IVT	221.81	1.91	0.2	116.03	0.52	0
hCG15178.2	138890	probe	183	6	1/ IVT	86.18	0.8	0.08	86.18	1.25	1
hCG15180.3	119175	probe	232	128	1/ IVT	1123.77	3.27	0.99	343.46	0.31	0
hCG15183.3	111525	probe	112	63	1/ IVT	1583.86	9.46	1.29	167.45	0.11	0
hCG15184.2	211361	probe	205	31	1/ IVT	330.37	2.01	0.29	164.74	0.5	0
hCG15185.3	150432	probe	193	14	1/ IVT	19069.5	37.69	16.83	505.95	0.05	0
hCG15188.2	164849	probe	15	130	1/ IVT	12350.5	67.23	10.07	183.7	0.04	0
hCG15190.3	145788	probe	103	51	1/ IVT	1996.43	11.05	1.63	180.75	0.1	0
hCG15192.3	205498	probe	230	159	1/ IVT	32918.9	46.06	29.06	714.77	0.04	0
hCG15193.3	222577	probe	37	54	1/ IVT	192.91	1.31	0.16	146.77	0.76	0
hCG15193.3	192935	probe	52	16	1/ IVT	757.7	-0.35	0.62	757.7	2.84	1
hCG15194.3	165955	probe	79	22	1/ IVT	450.16	2.98	0.37	150.98	0.34	0
hCG15195.3	147806	probe	167	4	1/ IVT	46097	41.89	40.69	1100.45	0.05	0
hCG15197.2	196199	probe	113	74	1/ IVT	497.07	2.31	0.41	215.21	0.43	0
hCG15198.3	100288	probe	226	135	1/ IVT	106.55	-0.09	0.09	106.55	11.55	1
hCG15199.3	190298	probe	217	32	1/ IVT	5737.15	44.42	5.06	129.16	0.04	0
hCG15200.2	167728	probe	230	47	1/ IVT	114262	72.02	100.87	1586.5	0.04	0
hCG15201.3	127096	probe	87	2	1/ IVT	17309.7	22.18	14.12	780.27	0.06	0
hCG15202.3	102988	probe	84	154	1/ IVT	59068.7	42.42	48.18	1392.39	0.04	0
hCG15204.4	162859	probe	135	14	1/ IVT	3866.72	19.28	3.41	200.53	0.06	0
hCG15204.4	163744	probe	138	81	1/ IVT	12790.4	21.48	11.29	595.59	0.06	0
hCG15207.2	147295	probe	18	19	1/ IVT	19768.8	60.38	16.12	327.4	0.04	0
hCG15208.3	164497	probe	83	8	1/ IVT	8376.27	16.17	6.83	517.94	0.07	0
hCG15217.3	122333	probe	26	82	1/ IVT	5962.4	60.7	4.86	98.23	0.04	0
hCG15219.3	142348	probe	10	32	1/ IVT	185.38	-1.39	0.15	185.38	0.72	1
hCG15226.3	222417	probe	137	25	1/ IVT	1193.23	5.89	1.05	202.59	0.17	0
hCG15226.3	171014	probe	179	77	1/ IVT	40104.1	80.54	35.4	497.95	0.04	0
hCG15229.3	118348	probe	159	115	1/ IVT	120.72	1.25	0.11	96.24	0.8	0
hCG15233.3	113324	probe	115	109	1/ IVT	25144.3	17.74	20.51	1416.98	0.07	0
hCG15234.3	164069	probe	195	128	1/ IVT	4441.02	9.57	3.92	463.95	0.11	0
hCG15235.3	187979	probe	142	36	1/ IVT	13679	25.7	12.08	532.23	0.05	0
hCG15236.3	162667	probe	105	3	1/ IVT	1796.44	1.77	1.47	1012.23	0.56	0
hCG15239.3	160885	probe	141	17	1/ IVT	630.98	2.92	0.56	216.18	0.34	0
hCG15244.3	212795	probe	11	147	1/ IVT	152.11	-2.72	0.12	152.11	0.37	1
hCG15249.2	106384	probe	46	23	1/ IVT	601.43	3.06	0.49	196.56	0.33	0
hCG15250.2	165409	probe	233	42	1/ IVT	16776.2	60.06	14.81	279.32	0.04	0
hCG15251.3	152803	probe	90	75	1/ IVT	927.87	3.57	0.76	259.55	0.28	0
hCG15253.2	146073	probe	170	54	1/ IVT	14719.6	28.13	12.99	523.3	0.05	0
hCG15254.3	126360	probe	232	155	1/ IVT	356.92	-0.02	0.32	356.92	45.83	1
hCG15255.3	152376	probe	147	84	1/ IVT	136049	88.45	120.1	1538.22	0.04	0
hCG15256.3	171463	probe	196	85	1/ IVT	173.78	0.71	0.15	173.78	1.42	1
hCG15257.3	215861	probe	95	122	1/ IVT	4727.68	18.82	3.86	251.23	0.06	0
hCG15259.4	145763	probe	112	14	1/ IVT	7275.33	39.86	5.93	182.52	0.04	0
hCG15260.2	226327	probe	104	123	1/ IVT	234.19	1.95	0.19	119.85	0.51	0
hCG15261.4	215653	probe	205	135	1/ IVT	168.5	-0.63	0.15	168.5	1.6	1
hCG15262.2	173075	probe	214	78	1/ IVT	4497.3	16.16	3.97	278.26	0.07	0
hCG15266.3	187739	probe	66	38	1/ IVT	1468.58	14.07	1.2	104.38	0.08	0
hCG15268.3	141854	probe	13	11	1/ IVT	6616.39	44.62	5.4	148.28	0.04	0
hCG15269.2	145935	probe	166	87	1/ IVT	3570.19	24.56	3.15	145.38	0.06	0
hCG15271.4	146890	probe	157	146	1/ IVT	1439.14	17.47	1.27	82.36	0.07	0
hCG15273.2	176593	probe	101	70	1/ IVT	14268.1	24.22	11.64	589.1	0.05	0
hCG15274.3	186303	probe	35	90	1/ IVT	1461.06	7.1	1.19	205.9	0.15	0
hCG15277.2	113797	probe	118	99	1/ IVT	7868.32	29.97	6.42	262.56	0.05	0
hCG15278.3	116420	probe	125	111	1/ IVT	8500.06	38.71	7.5	219.59	0.05	0
hCG15279.3	168202	probe	194	142	1/ IVT	12378	53.58	10.93	231	0.04	0
hCG15280.2	171965	probe	198	121	1/ IVT	1190.44	9.19	1.05	129.58	0.12	0
hCG15280.2	143286	probe	204	26	1/ IVT	523.8	4.88	0.46	107.42	0.21	0
hCG15281.3	186405	probe	53	49	1/ IVT	1356.42	9.65	1.11	140.6	0.11	0
hCG15283.4	204569	probe	144	44	1/ IVT	245.45	0.92	0.22	245.45	1.09	1
hCG15285.3	137428	probe	5	38	1/ IVT	48193.6	93.71	39.31	514.3	0.04	64
hCG15286.4	134027	probe	25	92	1/ IVT	3362.22	24.7	2.74	136.1	0.05	0
hCG15287.3	192382	probe	7	21	1/ IVT	42320.8	95.3	34.52	444.08	0.04	64
hCG15288.3	111527	probe	12	103	1/ IVT	10515.9	58.21	8.58	180.66	0.04	0
hCG15291.3	158624	probe	104	18	1/ IVT	457.5	0.3	0.37	457.5	3.34	1
hCG15295.2	205372	probe	19	23	1/ IVT	160.5	0.14	0.13	160.5	7.24	1
hCG15300.3	184373	probe	35	9	1/ IVT	29105.9	51.65	23.74	563.56	0.04	0
hCG15302.3	169607	probe	47	2	1/ IVT	209854	84.98	171.17	2469.5	0.04	0
hCG15305.3	155534	probe	199	95	1/ IVT	3888.13	33.16	3.43	117.26	0.05	0
hCG15308.2	117474	probe	95	117	1/ IVT	926.38	0.6	0.76	926.38	1.67	1
hCG15313.2	210299	probe	212	152	1/ IVT	291.6	-0.69	0.26	291.6	1.44	1
hCG15317.4	155366	probe	96	98	1/ IVT	268.85	-1.5	0.22	268.85	0.67	1
hCG15318.3	122707	probe	86	102	1/ IVT	196.14	-0.17	0.16	196.14	5.75	1
hCG15320.3	178078	probe	188	149	1/ IVT	120.87	0.64	0.11	120.87	1.56	1
hCG15321.2	180503	probe	115	9	1/ IVT	275.63	-0.79	0.22	275.63	1.27	1
hCG15322.3	112106	probe	232	55	1/ IVT	67.77	-1.28	0.06	67.77	0.78	1
hCG15323.2	216357	probe	69	97	1/ IVT	258.91	-1.06	0.21	258.91	0.94	1
hCG15324.2	214739	probe	211	141	1/ IVT	284.44	2.82	0.25	100.82	0.36	0
hCG15325.3	188733	probe	222	153	1/ IVT	303.89	2.39	0.27	126.95	0.42	0
hCG15326.2	167168	probe	169	106	1/ IVT	233.29	-0.27	0.21	233.29	3.71	1
hCG15327.2	119060	probe	97	99	1/ IVT	693.46	4.24	0.57	163.64	0.24	0
hCG15328.2	115258	probe	89	41	1/ IVT	148.42	-0.22	0.12	148.42	4.59	1
hCG15328.2	198822	probe	165	17	1/ IVT	170.29	4.65	0.15	36.63	0.22	0
hCG15328.2	175745	probe	202	24	1/ IVT	83.88	-0.52	0.07	83.88	1.93	1
hCG15329.2	136671	probe	156	122	1/ IVT	4235.43	25.06	3.74	169.01	0.06	0
hCG15332.2	206733	probe	186	85	1/ IVT	1079.32	6.49	0.95	166.32	0.16	0
hCG15334.2	186288	probe	188	61	1/ IVT	206.21	0.04	0.18	206.21	27.66	1
hCG15338.3	217468	probe	108	103	1/ IVT	1671.74	6.15	1.36	271.85	0.17	0
hCG15338.3	193295	probe	151	51	1/ IVT	138209	69.41	122.01	1991.29	0.04	0
hCG15340.4	189943	probe	125	24	1/ IVT	240.03	2.86	0.21	83.95	0.35	0
hCG15341.4	219722	probe	49	42	1/ IVT	171.97	1.25	0.14	137.59	0.8	0
hCG15341.4	196645	probe	105	141	1/ IVT	412.5	-0.16	0.34	412.5	6.37	1
hCG15344.4	134782	probe	192	133	1/ IVT	140966	67.85	124.44	2077.67	0.04	0
hCG15345.3	208024	probe	148	88	1/ IVT	69299.8	79.71	61.18	869.38	0.04	0
hCG15346.3	115354	probe	196	78	1/ IVT	19700.6	76.78	17.39	256.59	0.04	0
hCG15347.3	115964	probe	52	5	1/ IVT	754.16	4.31	0.62	175	0.23	0
hCG15348.3	199794	probe	137	142	1/ IVT	412.73	-0.61	0.36	412.73	1.65	1
hCG15349.3	129748	probe	162	62	1/ IVT	94.31	-2.27	0.08	94.31	0.44	1
hCG15350.3	202170	probe	39	21	1/ IVT	13380.2	53.9	10.91	248.26	0.04	0
hCG15351.3	213291	probe	49	55	1/ IVT	23583.4	87.87	19.24	268.39	0.04	0
hCG15352.3	141471	probe	73	23	1/ IVT	785.82	3.85	0.64	204.33	0.26	0
hCG15353.3	164701	probe	91	68	1/ IVT	4405.1	22.7	3.59	194.06	0.06	0
hCG15360.2	185378	probe	82	9	1/ IVT	864.4	-0.16	0.71	864.4	6.32	1
hCG15364.3	193266	probe	196	88	1/ IVT	10684.6	35.61	9.43	300.06	0.05	0
hCG15365.4	187621	probe	122	42	1/ IVT	250713	65.7	221.33	3815.78	0.04	0
hCG15366.3	174241	probe	208	98	1/ IVT	12128.9	33.98	10.71	356.92	0.05	0
hCG15367.4	137292	probe	35	63	1/ IVT	28835.6	92.56	23.52	311.52	0.04	64
hCG15368.3	185593	probe	134	85	1/ IVT	3071.37	9.26	2.71	331.6	0.11	0
hCG15369.2	137266	probe	58	108	1/ IVT	302.48	1.62	0.25	186.25	0.62	0
hCG15370.2	198659	probe	26	45	1/ IVT	2227.72	5.33	1.82	417.94	0.19	0
hCG15371.4	141286	probe	188	27	1/ IVT	637292	130.15	562.6	4896.74	0.04	64
hCG15379.3	190556	probe	111	38	1/ IVT	5064.48	29.62	4.13	170.96	0.05	0
hCG15381.3	105756	probe	116	93	1/ IVT	155.14	0.15	0.13	155.14	6.73	1
hCG15383.3	186437	probe	57	143	1/ IVT	3635.31	18.31	2.97	198.55	0.07	0
hCG15384.3	192455	probe	146	95	1/ IVT	599.35	3.55	0.53	168.84	0.28	0
hCG15386.4	178419	probe	187	70	1/ IVT	13156.3	81.59	11.61	161.25	0.04	0
hCG15389.3	188497	probe	202	11	1/ IVT	7185.12	37.81	6.34	190.01	0.05	0
hCG15391.2	149090	probe	229	48	1/ IVT	17522.7	30.61	15.47	572.41	0.05	0
hCG15392.3	101811	probe	50	26	1/ IVT	1.12714e+06	55.74	919.36	20222.7	0.04	0
hCG15392.3	158861	probe	68	10	1/ IVT	2095.62	0.24	1.71	2095.62	4.1	1
hCG15395.3	128906	probe	17	57	1/ IVT	843.82	4.28	0.69	196.97	0.24	0
hCG15397.3	191995	probe	50	89	1/ IVT	1230.99	7.78	1	158.22	0.13	0
hCG15397.3	217072	probe	229	130	1/ IVT	110.57	0.38	0.1	110.57	2.62	1
hCG15398.4	108119	probe	47	111	1/ IVT	7672.7	23.56	6.26	325.73	0.06	0
hCG15398.4	156380	probe	202	70	1/ IVT	925.3	1.95	0.82	474.42	0.51	0
hCG15399.2	179403	probe	49	148	1/ IVT	500.28	-1.36	0.41	500.28	0.73	1
hCG15400.2	132738	probe	18	73	1/ IVT	139.42	1.17	0.11	118.99	0.85	0
hCG15401.4	208328	probe	15	159	1/ IVT	29432.3	72.49	24.01	406.03	0.04	0
hCG15403.1	172623	probe	22	68	1/ IVT	489.96	1.39	0.4	353.26	0.72	0
hCG15404.2	143083	probe	205	101	1/ IVT	41649.5	79.29	36.77	525.27	0.04	0
hCG15406.3	120488	probe	189	105	1/ IVT	734.8	-1.41	0.65	734.8	0.71	1
hCG15408.2	146597	probe	94	34	1/ IVT	31574.7	56.65	25.75	557.36	0.04	0
hCG15412.2	107810	probe	24	142	1/ IVT	61624.6	107.38	50.26	573.88	0.04	64
hCG15413.2	171390	probe	202	122	1/ IVT	78836.7	61.76	69.6	1276.49	0.04	0
hCG15414.3	131715	probe	105	46	1/ IVT	2320.93	9.7	1.89	239.18	0.11	0
hCG15415.4	213482	probe	63	144	1/ IVT	956.1	6.92	0.78	138.14	0.15	0
hCG15422.3	226738	probe	5	139	1/ IVT	5351.86	36.75	4.37	145.64	0.04	0
hCG15424.2	116812	probe	173	30	1/ IVT	4820.67	27	4.26	178.56	0.05	0
hCG15425.3	219421	probe	45	32	1/ IVT	2075.71	17.79	1.69	116.69	0.07	0
hCG15425.3	215675	probe	96	23	1/ IVT	285.78	3.44	0.23	83.16	0.29	0
hCG15426.2	206415	probe	54	117	1/ IVT	1817.32	1.51	1.48	1200.29	0.66	0
hCG15426.2	204813	probe	225	103	1/ IVT	340.45	1.77	0.3	192.15	0.57	0
hCG15429.3	194463	probe	194	72	1/ IVT	42441.9	107.35	37.47	395.36	0.04	0
hCG15430.3	137699	probe	107	159	1/ IVT	220.87	-1.77	0.18	220.87	0.57	1
hCG15430.3	217518	probe	189	25	1/ IVT	12987.7	36.77	11.47	353.17	0.05	0
hCG15431.4	103476	probe	94	69	1/ IVT	1633.85	10.07	1.33	162.27	0.11	0
hCG15431.4	112110	probe	105	153	1/ IVT	10501.6	42.14	8.57	249.2	0.04	0
hCG15431.4	214322	probe	191	10	1/ IVT	1711.47	13.82	1.51	123.88	0.08	0
hCG15431.4	135102	probe	209	88	1/ IVT	1598.86	2.22	1.41	718.92	0.45	0
hCG15432.3	235170	probe	68	84	1/ IVT	231.74	0.44	0.19	231.74	2.26	1
hCG15432.3	120519	probe	70	25	1/ IVT	299.62	2.61	0.24	114.84	0.38	0
hCG15433.2	160545	probe	75	64	1/ IVT	10984.6	66.18	8.96	165.97	0.04	0
hCG15434.3	137302	probe	116	67	1/ IVT	13773.9	44.76	11.23	307.71	0.04	0
hCG15437.3	189926	probe	208	11	1/ IVT	201.61	-1.36	0.18	201.61	0.74	1
hCG15438.3	109636	probe	96	145	1/ IVT	26986.7	37.06	22.01	728.24	0.04	0
hCG15439.2	136196	probe	55	50	1/ IVT	18869.7	50.76	15.39	371.78	0.04	0
hCG15440.2	207590	probe	167	114	1/ IVT	183.52	0.13	0.16	183.52	7.81	1
hCG15441.2	174638	probe	223	104	1/ IVT	625.26	0.02	0.55	625.26	48.1	1
hCG15442.3	187636	probe	147	90	1/ IVT	195.8	1.52	0.17	128.55	0.66	0
hCG15443.2	188149	probe	19	157	1/ IVT	12412.5	20.55	10.12	603.98	0.06	0
hCG15444.3	174547	probe	236	101	1/ IVT	237.61	-1.35	0.21	237.61	0.74	1
hCG15445.3	220145	probe	38	139	1/ IVT	875.73	1.1	0.71	799.12	0.91	0
hCG15445.3	193902	probe	215	137	1/ IVT	16475.2	38.11	14.54	432.3	0.05	0
hCG15446.2	203719	probe	121	94	1/ IVT	1526.93	10.58	1.35	144.32	0.1	0
hCG15447.3	129974	probe	238	114	1/ IVT	96.53	-1.89	0.09	96.53	0.53	1
hCG15458.2	123914	probe	207	59	1/ IVT	99.25	2.89	0.09	34.31	0.35	0
hCG15462.4	210569	probe	70	92	1/ IVT	11998.1	51	9.79	235.27	0.04	0
hCG15462.4	217852	probe	215	83	1/ IVT	5650.13	38.02	4.99	148.59	0.05	0
hCG15463.2	158312	probe	139	44	1/ IVT	47514.6	69.12	41.95	687.47	0.04	0
hCG15465.3	101798	probe	168	42	1/ IVT	152.1	2.16	0.13	70.37	0.46	0
hCG15466.2	176265	probe	88	96	1/ IVT	283.77	1.5	0.23	189.76	0.67	0
hCG15468.3	159602	probe	173	91	1/ IVT	349.28	6.77	0.31	51.59	0.15	0
hCG15469.2	200796	probe	27	88	1/ IVT	22952.2	71.77	18.72	319.81	0.04	0
hCG15470.3	173780	probe	22	77	1/ IVT	93075.6	103.86	75.92	896.13	0.04	0
hCG15472.3	192373	probe	154	50	1/ IVT	330.82	0.98	0.29	330.82	1.02	1
hCG15474.4	187105	probe	34	152	1/ IVT	15097.6	68.96	12.31	218.92	0.04	0
hCG15475.3	133014	probe	47	59	1/ IVT	7555.74	70.09	6.16	107.81	0.04	0
hCG15476.3	193186	probe	65	22	1/ IVT	518.85	0.18	0.42	518.85	5.6	1
hCG15476.3	109922	probe	70	94	1/ IVT	621.64	0.26	0.51	621.64	3.83	1
hCG15477.4	167007	probe	43	25	1/ IVT	1203.58	10.79	0.98	111.58	0.1	0
hCG15478.3	158652	probe	94	150	1/ IVT	161120	46.38	131.42	3474.1	0.04	0
hCG15479.4	132805	probe	89	46	1/ IVT	257.68	0.13	0.21	257.68	7.75	1
hCG15479.4	225854	probe	177	105	1/ IVT	581.73	12.12	0.51	48.01	0.09	0
hCG15480.3	156311	probe	7	141	1/ IVT	2223.27	3.07	1.81	723.7	0.33	0
hCG15481.2	195908	probe	158	130	1/ IVT	832.07	6.59	0.73	126.26	0.16	0
hCG15483.2	201615	probe	156	16	1/ IVT	651.53	1.54	0.58	423.06	0.65	0
hCG15484.1	166813	probe	154	73	1/ IVT	39374.9	77.7	34.76	506.77	0.04	0
hCG15485.3	174314	probe	31	90	1/ IVT	308.91	-0.24	0.25	308.91	4.24	1
hCG15491.3	156523	probe	112	9	1/ IVT	1218.99	5.48	0.99	222.56	0.19	0
hCG15492.4	168176	probe	154	36	1/ IVT	3347.63	30.85	2.96	108.5	0.05	0
hCG15493.3	105113	probe	166	23	1/ IVT	744.89	4.91	0.66	151.57	0.21	0
hCG15493.3	108049	probe	168	35	1/ IVT	76495.8	71.23	67.53	1073.88	0.04	0
hCG15494.2	129040	probe	134	10	1/ IVT	91.55	-1.61	0.08	91.55	0.62	1
hCG15495.3	169003	probe	78	7	1/ IVT	100.53	-0.99	0.08	100.53	1.01	1
hCG15497.4	182185	probe	172	125	1/ IVT	5623.16	6.93	4.96	811.84	0.15	0
hCG15499.4	112323	probe	232	38	1/ IVT	125.27	-1	0.11	125.27	1	1
hCG15506.3	227870	probe	30	28	1/ IVT	701.82	6.77	0.57	103.73	0.15	0
hCG15506.3	100340	probe	215	91	1/ IVT	40507	48.65	35.76	832.64	0.04	0
hCG15507.2	193606	probe	136	97	1/ IVT	48555.8	60.27	42.86	805.69	0.04	0
hCG15511.4	127860	probe	206	126	1/ IVT	341.28	2.64	0.3	129.28	0.38	0
hCG15512.3	136614	probe	22	22	1/ IVT	282.05	-0.04	0.23	282.05	23.65	1
hCG15515.3	121141	probe	114	57	1/ IVT	4199.33	25.54	3.43	164.42	0.05	0
hCG15516.3	150768	probe	54	126	1/ IVT	34722.9	27.78	28.32	1249.97	0.05	0
hCG15516.3	112181	probe	130	63	1/ IVT	21763.9	53.98	19.21	403.15	0.04	0
hCG15518.3	201682	probe	192	12	1/ IVT	473.73	-0.53	0.42	473.73	1.88	1
hCG15519.2	134034	probe	93	29	1/ IVT	563.64	0.72	0.46	563.64	1.4	1
hCG15520.3	148963	probe	101	7	1/ IVT	366.65	0.73	0.3	366.65	1.37	1
hCG15521.3	212778	probe	174	55	1/ IVT	54232.4	120.2	47.88	451.18	0.04	64
hCG15522.4	145220	probe	128	8	1/ IVT	390052	39.39	344.34	9903.16	0.05	0
hCG15525.3	126764	probe	163	18	1/ IVT	67.94	-0.29	0.06	67.94	3.46	1
hCG15525.3	222961	probe	207	41	1/ IVT	448.4	8.06	0.4	55.65	0.13	0
hCG15528.2	155347	probe	158	150	1/ IVT	400973	71.76	353.98	5587.67	0.04	0
hCG15528.2	210850	probe	210	32	1/ IVT	201328	86.48	177.73	2327.93	0.04	0
hCG15529.4	181116	probe	239	37	1/ IVT	6844.65	34.63	6.04	197.65	0.05	0
hCG15532.3	162394	probe	211	3	1/ IVT	751.12	7.83	0.66	95.9	0.13	0
hCG15535.3	176882	probe	178	138	1/ IVT	426.74	3.2	0.38	133.18	0.31	0
hCG15536.3	163129	probe	2	146	1/ IVT	6315.47	72.54	5.15	87.06	0.04	0
hCG15537.3	226129	probe	214	121	1/ IVT	92987.4	81.11	82.09	1146.4	0.04	0
hCG15540.2	200734	probe	216	56	1/ IVT	17933.3	38.79	15.83	462.28	0.05	0
hCG15541.3	101368	probe	11	132	1/ IVT	695.91	2.44	0.57	285.55	0.41	0
hCG15542.3	134875	probe	177	8	1/ IVT	8066.49	47.16	7.12	171.04	0.04	0
hCG15543.3	153653	probe	215	125	1/ IVT	799.69	9.21	0.71	86.82	0.12	0
hCG15552.2	110915	probe	227	104	1/ IVT	565.32	4.42	0.5	127.96	0.23	0
hCG15553.3	136748	probe	185	116	1/ IVT	40.71	0.61	0.04	40.71	1.63	1
hCG15554.2	102046	probe	68	24	1/ IVT	25326.5	73.03	20.66	346.78	0.04	0
hCG15558.2	210016	probe	152	8	1/ IVT	1200.7	2.6	1.06	461.15	0.39	0
hCG15559.2	191646	probe	79	75	1/ IVT	76209.1	77.76	62.16	980.09	0.04	0
hCG15560.4	122582	probe	13	3	1/ IVT	6559.27	29.83	5.35	219.92	0.05	0
hCG15565.3	168970	probe	64	90	1/ IVT	564.91	4.79	0.46	117.84	0.21	0
hCG15565.3	119157	probe	164	150	1/ IVT	1185.64	3.28	1.05	361.29	0.31	0
hCG15566.2	121075	probe	172	147	1/ IVT	11937.2	36.82	10.54	324.22	0.05	0
hCG15567.2	170466	probe	32	108	1/ IVT	1295.3	10.96	1.06	118.21	0.1	0
hCG15568.2	146625	probe	185	50	1/ IVT	15513.5	68.65	13.7	225.97	0.04	0
hCG15569.4	180202	probe	178	65	1/ IVT	94811.1	86.99	83.7	1089.85	0.04	0
hCG15571.4	191423	probe	109	49	1/ IVT	2118.75	12.95	1.73	163.6	0.09	0
hCG15574.3	180557	probe	8	14	1/ IVT	863.74	6.45	0.7	133.86	0.16	0
hCG15574.3	205626	probe	58	77	1/ IVT	3259.19	14.25	2.66	228.64	0.08	0
hCG15576.3	128692	probe	179	8	1/ IVT	17553.6	52.44	15.5	334.72	0.04	0
hCG15577.3	142705	probe	36	113	1/ IVT	9221.34	32.16	7.52	286.73	0.05	0
hCG15578.3	179970	probe	170	68	1/ IVT	6103.02	43.88	5.39	139.08	0.04	0
hCG15578.3	108602	probe	227	34	1/ IVT	2937.33	24.16	2.59	121.59	0.06	0
hCG15579.3	198352	probe	97	101	1/ IVT	37272.3	85.78	30.4	434.52	0.04	0
hCG15580.3	191345	probe	227	2	1/ IVT	992.35	4.06	0.88	244.36	0.25	0
hCG15581.4	105226	probe	19	159	1/ IVT	24426.4	53.48	19.92	456.77	0.04	0
hCG15582.2	152213	probe	125	138	1/ IVT	6811.12	28.17	6.01	241.81	0.05	0
hCG15583.3	209528	probe	165	30	1/ IVT	18733.8	52.69	16.54	355.58	0.04	0
hCG15585.2	105160	probe	90	41	1/ IVT	1108.8	2.65	0.9	417.78	0.38	0
hCG15587.3	120638	probe	226	148	1/ IVT	4627.99	11.31	4.09	409.27	0.1	0
hCG15590.3	216585	probe	225	13	1/ IVT	106.77	-1.51	0.09	106.77	0.66	1
hCG15599.3	149049	probe	133	111	1/ IVT	312.66	1.55	0.28	201.74	0.65	0
hCG15602.3	123083	probe	204	11	1/ IVT	3655.7	41.45	3.23	88.2	0.05	0
hCG15603.3	218178	probe	34	16	1/ IVT	2212.06	20.59	1.8	107.42	0.06	0
hCG15603.3	162214	probe	116	23	1/ IVT	1482.62	22.55	1.21	65.74	0.06	0
hCG15606.3	131020	probe	42	116	1/ IVT	3092.06	3.34	2.52	926.98	0.3	0
hCG15607.3	126010	probe	101	88	1/ IVT	1926.88	5.86	1.57	328.56	0.17	0
hCG15609.3	120176	probe	16	24	1/ IVT	32750	71.85	26.71	455.81	0.04	0
hCG15612.3	162894	probe	218	141	1/ IVT	1688.2	12.03	1.49	140.34	0.09	0
hCG15613.3	222126	probe	96	144	1/ IVT	245.41	-1.32	0.2	245.41	0.76	1
hCG15613.3	152616	probe	114	65	1/ IVT	609.76	2.08	0.5	292.5	0.48	0
hCG15614.2	142986	probe	119	125	1/ IVT	13142.5	39.64	10.72	331.56	0.04	0
hCG15615.3	115147	probe	66	157	1/ IVT	346.32	-1.08	0.28	346.32	0.92	1
hCG15615.3	143239	probe	155	125	1/ IVT	508.47	1.23	0.45	412.42	0.81	0
hCG15616.2	167384	probe	62	131	1/ IVT	9134.25	35.79	7.45	255.2	0.05	0
hCG15622.3	203961	probe	172	139	1/ IVT	1421.96	4.74	1.26	299.78	0.21	0
hCG15623.4	110417	probe	188	82	1/ IVT	13385.4	29.7	11.82	450.68	0.05	0
hCG15625.3	149014	probe	18	92	1/ IVT	10418.9	47.58	8.5	218.97	0.04	0
hCG15626.2	186730	probe	134	115	1/ IVT	14944.2	25.54	13.19	585.05	0.05	0
hCG15627.2	137897	probe	214	56	1/ IVT	4892.56	23.6	4.32	207.28	0.06	0
hCG15629.3	167847	probe	84	69	1/ IVT	48314.6	38.69	39.41	1248.92	0.04	0
hCG15630.3	112601	probe	174	122	1/ IVT	8065.93	28.05	7.12	287.53	0.05	0
hCG15635.2	118634	probe	211	61	1/ IVT	149.73	2.35	0.13	63.72	0.43	0
hCG15637.3	176241	probe	129	52	1/ IVT	702.96	8.12	0.62	86.54	0.13	0
hCG15638.2	101860	probe	101	25	1/ IVT	347.11	1.94	0.28	178.56	0.52	0
hCG15641.3	10480018	probe	66	53	1/ IVT	8835.52	29.38	7.21	300.77	0.05	0
hCG15642.3	205753	probe	11	12	1/ IVT	11964.8	11.32	9.76	1056.58	0.1	0
hCG15643.3	141516	probe	194	127	1/ IVT	23985.4	36.9	21.17	650.09	0.05	0
hCG15646.2	134065	probe	209	124	1/ IVT	35814.2	81.68	31.62	438.5	0.04	0
hCG15647.2	213218	probe	47	64	1/ IVT	188.93	-0.85	0.15	188.93	1.18	1
hCG15649.3	182853	probe	112	89	1/ IVT	14207	25.21	11.59	563.45	0.05	0
hCG15651.1	129859	probe	10	124	1/ IVT	12428.5	42.22	10.14	294.36	0.04	0
hCG15652.2	228316	probe	115	86	1/ IVT	75424.9	79.71	61.52	946.19	0.04	0
hCG15653.3	211988	probe	198	105	1/ IVT	20153.5	60.1	17.79	335.33	0.04	0
hCG15657.2	163121	probe	13	119	1/ IVT	30501.3	12.47	24.88	2445.91	0.09	0
hCG15662.3	130672	probe	83	118	1/ IVT	11618.5	46.86	9.48	247.93	0.04	0
hCG15665.2	208710	probe	73	29	1/ IVT	1748.45	18.1	1.43	96.61	0.07	0
hCG15668.2	174531	probe	101	39	1/ IVT	5778.81	22.54	4.71	256.42	0.06	0
hCG15669.4	163822	probe	104	65	1/ IVT	114.77	0	0.09	114.77	216.3	1
hCG15670.4	141679	probe	98	42	1/ IVT	34659.8	36.64	28.27	945.99	0.04	0
hCG15672.2	133721	probe	88	10	1/ IVT	1355.8	6.33	1.11	214.24	0.16	0
hCG15673.2	189219	probe	118	139	1/ IVT	20659	45.54	16.85	453.61	0.04	0
hCG15674.3	107357	probe	181	129	1/ IVT	7498.77	32.32	6.62	232.05	0.05	0
hCG15675.3	102661	probe	11	2	1/ IVT	15467.1	43.77	12.62	353.35	0.04	0
hCG15679.2	191770	probe	104	136	1/ IVT	1999.05	9.81	1.63	203.81	0.11	0
hCG15680.3	120144	probe	75	79	1/ IVT	21848.7	85.3	17.82	256.15	0.04	0
hCG15683.3	200201	probe	31	67	1/ IVT	1.51903e+06	92.76	1239	16375.6	0.04	4
hCG15683.3	159365	probe	203	114	1/ IVT	344586	94.5	304.2	3646.49	0.04	0
hCG15685.3	104625	probe	193	65	1/ IVT	1.0062e+06	133.43	888.27	7540.96	0.04	64
hCG15689.3	182906	probe	132	132	1/ IVT	2760.02	21.76	2.44	126.82	0.06	0
hCG15690.4	186922	probe	50	159	1/ IVT	8167.51	31.4	6.66	260.09	0.05	0
hCG15691.4	207468	probe	11	37	1/ IVT	45199	77.4	36.87	583.95	0.04	0
hCG15692.3	128484	probe	228	61	1/ IVT	161.18	4.72	0.14	34.18	0.22	0
hCG15693.3	190465	probe	81	153	1/ IVT	199.98	0.18	0.16	199.98	5.56	1
hCG15695.2	107201	probe	199	50	1/ IVT	10710.8	50.37	9.46	212.66	0.04	0
hCG15697.2	124730	probe	12	104	1/ IVT	13158	80.2	10.73	164.07	0.04	64
hCG15699.2	176259	probe	166	36	1/ IVT	2693.27	25.31	2.38	106.42	0.06	0
hCG15700.2	216296	probe	136	122	1/ IVT	10350.5	29.84	9.14	346.84	0.05	0
hCG15701.3	205038	probe	83	72	1/ IVT	208.31	-1.1	0.17	208.31	0.91	1
hCG15702.2	190918	probe	222	87	1/ IVT	39028.6	58.41	34.45	668.16	0.04	0
hCG15707.3	102403	probe	117	113	1/ IVT	11899.1	60.43	9.71	196.91	0.04	0
hCG15708.2	210317	probe	193	127	1/ IVT	17991	19.73	15.88	911.69	0.06	0
hCG15709.3	148762	probe	57	83	1/ IVT	1198.76	5.51	0.98	217.61	0.18	0
hCG15710.3	156494	probe	235	36	1/ IVT	10930.5	65.49	9.65	166.9	0.04	0
hCG15711.2	109358	probe	76	71	1/ IVT	500.01	1.02	0.41	488.86	0.98	0
hCG15712.4	202407	probe	57	59	1/ IVT	1199.25	7.21	0.98	166.41	0.14	0
hCG15718.2	166056	probe	201	84	1/ IVT	1243.15	7.12	1.1	174.5	0.15	0
hCG15719.4	236724	probe	107	77	1/ IVT	1.28357e+06	82.36	1046.95	15585.3	0.04	0
hCG15721.2	160679	probe	23	35	1/ IVT	5310.39	21.78	4.33	243.85	0.06	0
hCG15722.3	200736	probe	1	50	1/ IVT	1409.51	9.58	1.15	147.09	0.11	0
hCG15724.3	106282	probe	81	106	1/ IVT	3163.6	16.59	2.58	190.65	0.07	0
hCG15724.3	186980	probe	209	102	1/ IVT	2441.81	14.64	2.16	166.8	0.08	0
hCG15731.3	134635	probe	7	122	1/ IVT	107.22	0.67	0.09	107.22	1.49	1
hCG15737.2	106993	probe	155	12	1/ IVT	519.95	3.61	0.46	144.04	0.28	0
hCG15738.3	215613	probe	192	18	1/ IVT	7644.09	29.54	6.75	258.74	0.05	0
hCG15739.4	185900	probe	58	126	1/ IVT	1092.48	3.44	0.89	317.68	0.29	0
hCG15741.3	200666	probe	152	42	1/ IVT	808.34	7.65	0.71	105.61	0.14	0
hCG15743.2	170408	probe	196	135	1/ IVT	858.59	12.79	0.76	67.15	0.09	0
hCG15744.2	161347	probe	206	134	1/ IVT	130.36	1.13	0.12	115.21	0.88	0
hCG15745.3	209676	probe	107	131	1/ IVT	2829.01	10.27	2.31	275.58	0.1	0
hCG15747.3	104254	probe	172	155	1/ IVT	19791.5	74.3	17.47	266.36	0.04	0
hCG15749.2	175647	probe	150	38	1/ IVT	169052	98.78	149.24	1711.48	0.04	0
hCG15752.3	105450	probe	127	38	1/ IVT	247849	87.53	218.8	2831.72	0.04	0
hCG15753.2	198949	probe	164	10	1/ IVT	783.73	5.23	0.69	149.94	0.2	0
hCG15754.3	109802	probe	131	79	1/ IVT	49411.5	77.04	43.62	641.39	0.04	0
hCG15755.3	100547	probe	225	48	1/ IVT	499.68	4.09	0.44	122.09	0.25	0
hCG15756.2	169472	probe	43	66	1/ IVT	594.77	0.38	0.49	594.77	2.61	1
hCG15757.3	150425	probe	169	118	1/ IVT	19196.3	51.62	16.95	371.86	0.04	0
hCG15760.3	193211	probe	45	18	1/ IVT	113.14	-0.28	0.09	113.14	3.6	1
hCG15766.4	194412	probe	224	71	1/ IVT	31505.9	45.07	27.81	699.05	0.04	0
hCG15767.3	197310	probe	135	73	1/ IVT	44100.7	65.69	38.93	671.32	0.04	0
hCG15768.3	119689	probe	70	136	1/ IVT	2686.62	1.09	2.19	2459.49	0.92	0
hCG15769.2	214787	probe	37	151	1/ IVT	4084.37	18.13	3.33	225.24	0.07	0
hCG15771.3	142752	probe	132	11	1/ IVT	975.62	6.85	0.86	142.33	0.15	0
hCG15772.4	180244	probe	152	136	1/ IVT	470.1	5.31	0.42	88.52	0.19	0
hCG15774.3	115999	probe	59	151	1/ IVT	559.83	0.8	0.46	559.83	1.25	1
hCG15775.4	105260	probe	168	50	1/ IVT	39665.1	108.29	35.02	366.29	0.04	64
hCG15776.3	210785	probe	205	110	1/ IVT	204.73	3.05	0.18	67.03	0.33	0
hCG15777.4	143400	probe	113	121	1/ IVT	2568.18	20.71	2.09	123.99	0.06	0
hCG15778.4	167566	probe	23	103	1/ IVT	3521.52	16.89	2.87	208.44	0.07	0
hCG15780.3	133206	probe	175	93	1/ IVT	3001.76	18.73	2.65	160.23	0.07	0
hCG15781.3	217339	probe	12	111	1/ IVT	157464	91.3	128.44	1724.7	0.04	64
hCG15781.3	103877	probe	123	93	1/ IVT	98.39	-0.06	0.09	98.39	16.14	1
hCG15782.3	111340	probe	184	97	1/ IVT	648.84	3.22	0.57	201.27	0.31	0
hCG15783.4	207537	probe	81	4	1/ IVT	25680.3	28.93	20.95	887.67	0.05	0
hCG15784.2	121704	probe	124	74	1/ IVT	199.96	-2.15	0.18	199.96	0.47	1
hCG15785.3	214774	probe	78	65	1/ IVT	142965	91.45	116.61	1563.38	0.04	0
hCG15785.3	296275	probe	138	45	1/ IVT	196612	63.93	173.57	3075.27	0.04	0
hCG15785.3	189793	probe	233	68	1/ IVT	56172.2	60.12	49.59	934.28	0.04	0
hCG15786.3	210469	probe	45	1	1/ IVT	13164.7	31.82	10.74	413.75	0.05	0
hCG15790.2	112075	probe	166	1	1/ IVT	4645.83	35.93	4.1	129.29	0.05	0
hCG15791.3	192117	probe	158	155	1/ IVT	9557.05	41.55	8.44	230.03	0.05	0
hCG15792.3	129829	probe	109	153	1/ IVT	840.42	13.96	0.69	60.22	0.08	0
hCG15797.4	206731	probe	225	29	1/ IVT	97369	77.27	85.96	1260.18	0.04	0
hCG15798.2	222738	probe	174	13	1/ IVT	79.44	0.49	0.07	79.44	2.03	1
hCG15799.3	178520	probe	17	4	1/ IVT	2001.69	11.66	1.63	171.72	0.09	0
hCG15799.3	159563	probe	196	29	1/ IVT	15147.9	60.99	13.37	248.38	0.04	0
hCG15799.3	110512	probe	222	139	1/ IVT	5669.51	16.81	5.01	337.26	0.07	0
hCG15800.2	117649	probe	91	112	1/ IVT	290.97	2.29	0.24	126.93	0.44	0
hCG15804.3	702479	probe	224	121	1/ IVT	8641.76	32.04	7.63	269.7	0.05	0
hCG15807.2	167549	probe	66	99	1/ IVT	19206.3	42.14	15.67	455.76	0.04	0
hCG15814.3	182123	probe	36	118	1/ IVT	2131.7	8.69	1.74	245.22	0.12	0
hCG15814.3	227740	probe	144	15	1/ IVT	6000.4	36.7	5.3	163.51	0.05	0
hCG15818.3	132221	probe	86	66	1/ IVT	21607.8	39.54	17.62	546.47	0.04	0
hCG15820.3	105383	probe	214	2	1/ IVT	51728.9	51.14	45.67	1011.46	0.04	0
hCG15821.3	196301	probe	97	66	1/ IVT	467.17	2.21	0.38	211.54	0.45	0
hCG15822.2	138929	probe	228	143	1/ IVT	18178	35.44	16.05	512.88	0.05	0
hCG15829.4	105555	probe	66	59	1/ IVT	14242.5	66.67	11.62	213.63	0.04	0
hCG15830.2	123925	probe	123	45	1/ IVT	201.77	0.58	0.18	201.77	1.74	1
hCG15832.4	101692	probe	147	45	1/ IVT	145059	57.48	128.06	2523.8	0.04	0
hCG15833.2	219483	probe	181	147	1/ IVT	29400	54.26	25.95	541.8	0.04	0
hCG15834.3	173676	probe	136	106	1/ IVT	51715.6	80.59	45.65	641.69	0.04	0
hCG15837.2	180198	probe	56	87	1/ IVT	1085.89	8.09	0.89	134.15	0.13	0
hCG15844.3	179609	probe	50	157	1/ IVT	2609.71	9.35	2.13	279.24	0.11	0
hCG15845.3	193830	probe	9	12	1/ IVT	8532.73	6.35	6.96	1342.92	0.16	0
hCG15848.3	136572	probe	154	58	1/ IVT	7477.82	32.95	6.6	226.93	0.05	0
hCG15849.3	120981	probe	212	136	1/ IVT	139.75	0.13	0.12	139.75	7.68	1
hCG15850.3	203109	probe	113	44	1/ IVT	42572.3	81.85	34.72	520.12	0.04	0
hCG15851.3	134387	probe	216	2	1/ IVT	1493.63	2.52	1.32	593.32	0.4	0
hCG15852.4	218514	probe	74	59	1/ IVT	291.16	1.04	0.24	281.1	0.97	0
hCG15852.4	332119	probe	129	10	1/ IVT	68988.1	31.34	60.9	2201.32	0.05	0
hCG15854.3	264760	probe	36	1	1/ IVT	1871.37	18.97	1.53	98.64	0.06	0
hCG15857.3	204389	probe	222	14	1/ IVT	276.27	0.4	0.24	276.27	2.5	1
hCG15864.3	221107	probe	204	64	1/ IVT	2400.91	38.32	2.12	62.66	0.05	0
hCG15865.2	229341	probe	56	44	1/ IVT	35354.4	67.04	28.84	527.36	0.04	0
hCG15866.2	171786	probe	98	50	1/ IVT	38524	69.91	31.42	551.05	0.04	0
hCG15867.3	106963	probe	197	23	1/ IVT	23604.3	79.21	20.84	297.99	0.04	0
hCG15868.2	194079	probe	90	103	1/ IVT	12951.8	44.21	10.56	292.99	0.04	0
hCG15870.2	163352	probe	124	154	1/ IVT	449.82	1.79	0.4	251.24	0.56	0
hCG15871.3	148114	probe	205	106	1/ IVT	23837.4	75.18	21.04	317.07	0.04	0
hCG15872.3	215836	probe	183	46	1/ IVT	283.03	3.1	0.25	91.25	0.32	0
hCG15874.2	169049	probe	182	6	1/ IVT	2339.35	14.93	2.07	156.67	0.08	0
hCG15876.3	154792	probe	82	126	1/ IVT	317.29	-0.1	0.26	317.29	9.89	1
hCG15878.3	199643	probe	18	95	1/ IVT	15680.2	60.11	12.79	260.86	0.04	0
hCG15878.3	219323	probe	116	144	1/ IVT	125767	68.07	102.58	1847.49	0.04	0
hCG15879.3	191455	probe	38	159	1/ IVT	8035.29	36.99	6.55	217.25	0.04	0
hCG15880.5	189199	probe	156	93	1/ IVT	327312	71.51	288.95	4576.85	0.04	0
hCG15881.3	179073	probe	45	94	1/ IVT	5751.58	26.47	4.69	217.27	0.05	0
hCG15881.3	131480	probe	228	1	1/ IVT	8067.07	55.53	7.12	145.28	0.04	0
hCG15883.2	169001	probe	209	110	1/ IVT	473.27	-0.17	0.42	473.27	5.9	1
hCG15892.2	211949	probe	215	8	1/ IVT	500.61	3.76	0.44	132.98	0.27	0
hCG15893.2	213472	probe	119	53	1/ IVT	31602.2	62	25.78	509.67	0.04	0
hCG15894.3	129144	probe	151	96	1/ IVT	7883.54	37.75	6.96	208.81	0.05	64
hCG15901.3	218145	probe	104	39	1/ IVT	479.86	5.23	0.39	91.8	0.19	0
hCG15901.3	208606	probe	145	8	1/ IVT	4245.35	8.05	3.75	527.44	0.13	0
hCG15901.3	168722	probe	207	139	1/ IVT	421.29	2.08	0.37	202.68	0.48	0
hCG15902.3	188922	probe	196	65	1/ IVT	69459.8	111.62	61.32	622.28	0.04	64
hCG15912.4	162270	probe	177	69	1/ IVT	361.38	2.05	0.32	176.31	0.49	0
hCG15913.2	143980	probe	172	118	1/ IVT	252772	96.58	223.15	2617.15	0.04	0
hCG15914.3	118147	probe	221	152	1/ IVT	85038.1	38.62	75.07	2202.08	0.05	0
hCG15915.3	106454	probe	195	124	1/ IVT	31478.6	93.4	27.79	337.02	0.04	0
hCG15917.3	132666	probe	103	114	1/ IVT	104252	93.52	85.03	1114.76	0.04	0
hCG15918.3	151550	probe	111	8	1/ IVT	19895.2	32.72	16.23	608.09	0.05	0
hCG15919.3	150749	probe	145	151	1/ IVT	45477.5	74.81	40.15	607.89	0.04	0
hCG15922.2	105837	probe	194	55	1/ IVT	630.62	-0.3	0.56	630.62	3.33	1
hCG15923.2	140853	probe	53	59	1/ IVT	484570	64.9	395.24	7466.72	0.04	0
hCG15924.4	192931	probe	57	155	1/ IVT	793.11	0.23	0.65	793.11	4.35	1
hCG15926.3	185199	probe	76	29	1/ IVT	8754.1	37.86	7.14	231.2	0.04	0
hCG15927.3	167891	probe	67	108	1/ IVT	29807.7	81.29	24.31	366.66	0.04	0
hCG15927.3	104741	probe	146	142	1/ IVT	71296.6	68.03	62.94	1048.04	0.04	0
hCG15929.3	203338	probe	37	47	1/ IVT	543.64	0.32	0.44	543.64	3.09	1
hCG15935.2	146938	probe	129	145	1/ IVT	451.62	-0.37	0.4	451.62	2.67	1
hCG15937.2	231342	probe	183	114	1/ IVT	131057	104.23	115.7	1257.37	0.04	64
hCG15938.2	169837	probe	221	67	1/ IVT	109.12	-0.18	0.1	109.12	5.71	1
hCG15940.3	193667	probe	101	59	1/ IVT	1053.7	3.16	0.86	333.52	0.32	0
hCG15942.2	236734	probe	218	128	1/ IVT	445.57	3.79	0.39	117.54	0.27	0
hCG15952.3	183323	probe	201	17	1/ IVT	115.24	-0.36	0.1	115.24	2.8	1
hCG15953.3	107922	probe	122	64	1/ IVT	127.72	-1.73	0.11	127.72	0.58	1
hCG15954.4	160892	probe	15	155	1/ IVT	349.42	2.56	0.29	136.71	0.39	0
hCG15955.3	100570	probe	198	37	1/ IVT	10328.7	77.03	9.12	134.09	0.04	0
hCG15958.2	107070	probe	206	107	1/ IVT	9199.54	56.71	8.12	162.22	0.04	0
hCG15959.3	123461	probe	185	95	1/ IVT	119.65	-2.2	0.11	119.65	0.46	1
hCG15962.3	121941	probe	143	63	1/ IVT	1433.34	21.02	1.27	68.18	0.06	0
hCG15963.3	124944	probe	21	66	1/ IVT	1125.46	4.21	0.92	267.33	0.24	0
hCG15971.2	108971	probe	93	149	1/ IVT	32011.5	33.11	26.11	966.95	0.05	0
hCG15972.3	159351	probe	95	8	1/ IVT	80867.7	36.97	65.96	2187.2	0.04	0
hCG15972.3	162971	probe	175	136	1/ IVT	1038.49	8.45	0.92	122.96	0.12	0
hCG15972.3	220796	probe	193	147	1/ IVT	155626	90.17	137.39	1725.92	0.04	0
hCG15975.3	143014	probe	130	135	1/ IVT	48044.3	55.66	42.41	863.18	0.04	0
hCG15980.4	216486	probe	192	154	1/ IVT	4483.16	24.02	3.96	186.61	0.06	0
hCG15982.3	145093	probe	28	149	1/ IVT	148480	107.63	121.11	1379.57	0.04	64
hCG15982.3	201963	probe	126	125	1/ IVT	225481	52.38	199.05	4304.65	0.04	0
hCG15983.3	230968	probe	58	31	1/ IVT	153.43	-0.81	0.13	153.43	1.24	1
hCG15986.3	158140	probe	181	117	1/ IVT	232.02	2.25	0.2	103.15	0.45	0
hCG15987.3	156190	probe	214	132	1/ IVT	182.74	-2	0.16	182.74	0.5	1
hCG15988.3	220062	probe	75	56	1/ IVT	546.21	2.7	0.45	202.63	0.37	0
hCG15988.3	101666	probe	121	38	1/ IVT	190.39	1.15	0.17	164.85	0.87	0
hCG15988.3	118299	probe	159	122	1/ IVT	6256.64	37.21	5.52	168.12	0.05	0
hCG15990.3	160108	probe	1	44	1/ IVT	210.93	-0.04	0.17	210.93	27.69	1
hCG15990.3	113147	probe	130	1	1/ IVT	92.45	-1.34	0.08	92.45	0.75	1
hCG15992.3	124744	probe	57	34	1/ IVT	3020.26	7.25	2.46	416.4	0.14	0
hCG15993.3	142874	probe	234	18	1/ IVT	299.37	1.58	0.26	189.56	0.63	0
hCG15995.3	180577	probe	85	92	1/ IVT	21158.8	44.03	17.26	480.58	0.04	0
hCG15997.3	225077	probe	11	119	1/ IVT	15488.1	66.01	12.63	234.63	0.04	0
hCG15997.3	693712	probe	66	108	1/ IVT	410.37	2.31	0.33	177.51	0.43	0
hCG15997.3	146514	probe	212	88	1/ IVT	13894.2	16.95	12.27	819.66	0.07	0
hCG15998.2	225390	probe	190	110	1/ IVT	473.53	7.52	0.42	62.93	0.14	0
hCG15998.2	211713	probe	192	143	1/ IVT	44972.3	84.82	39.7	530.19	0.04	0
hCG15999.3	109410	probe	171	4	1/ IVT	289.14	-0.34	0.26	289.14	2.93	1
hCG16018.3	157338	probe	18	53	1/ IVT	514.23	-0.29	0.42	514.23	3.47	1
hCG16019.3	115770	probe	21	158	1/ IVT	1526.18	4.98	1.24	306.28	0.2	0
hCG16021.3	127127	probe	149	102	1/ IVT	683.39	6.99	0.6	97.71	0.15	0
hCG16022.3	227712	probe	145	84	1/ IVT	115.65	-0.4	0.1	115.65	2.51	1
hCG16022.3	151724	probe	189	44	1/ IVT	3670.08	6.53	3.24	561.9	0.16	0
hCG16023.3	170781	probe	39	153	1/ IVT	362208	102.43	295.44	3536.23	0.04	64
hCG16028.3	225251	probe	74	91	1/ IVT	157.8	0.24	0.13	157.8	4.1	1
hCG16029.3	214534	probe	93	1	1/ IVT	158.01	-0.23	0.13	158.01	4.31	1
hCG16030.2	186894	probe	4	35	1/ IVT	51766.2	98.61	42.22	524.93	0.04	64
hCG16031.2	210417	probe	99	24	1/ IVT	33370.3	47.72	27.22	699.37	0.04	0
hCG16031.2	218810	probe	191	132	1/ IVT	77.28	-0.06	0.07	77.28	15.84	1
hCG16033.3	106311	probe	48	9	1/ IVT	28119.5	57.25	22.94	491.17	0.04	0
hCG16043.2	226167	probe	195	87	1/ IVT	4832.75	21.75	4.27	222.18	0.06	0
hCG16045.4	192781	probe	175	151	1/ IVT	6235.98	30.56	5.51	204.06	0.05	0
hCG16047.2	122174	probe	166	82	1/ IVT	97.01	2.03	0.09	47.76	0.49	0
hCG16049.3	186772	probe	161	32	1/ IVT	19892	45.55	17.56	436.73	0.04	0
hCG16050.3	166549	probe	139	125	1/ IVT	88881.8	82.5	78.46	1077.36	0.04	0
hCG16053.3	129085	probe	176	46	1/ IVT	82.11	-2.48	0.07	82.11	0.4	1
hCG16055.3	149921	probe	214	148	1/ IVT	72.41	-3.98	0.06	72.41	0.25	131073
hCG16056.2	108674	probe	45	6	1/ IVT	159.5	-0.24	0.13	159.5	4.15	1
hCG16057.2	157979	probe	175	91	1/ IVT	36540	84.16	32.26	434.16	0.04	0
hCG16059.2	117210	probe	73	159	1/ IVT	20946.1	53.95	17.08	388.26	0.04	0
hCG16061.3	191167	probe	175	149	1/ IVT	936.18	-0.2	0.83	936.18	5.12	1
hCG16062.4	195131	probe	223	32	1/ IVT	1256.75	9.57	1.11	131.37	0.11	0
hCG16065.3	191994	probe	170	78	1/ IVT	419.19	2.88	0.37	145.57	0.35	0
hCG16067.2	194477	probe	66	49	1/ IVT	549.99	0.32	0.45	549.99	3.15	1
hCG16070.3	190934	probe	95	64	1/ IVT	662.89	3.44	0.54	192.88	0.29	0
hCG16072.3	139546	probe	95	110	1/ IVT	25866	58.65	21.1	441.03	0.04	0
hCG16074.3	155169	probe	47	63	1/ IVT	1005.26	6.2	0.82	162.04	0.17	0
hCG16076.4	170400	probe	70	51	1/ IVT	1.14461e+06	102.33	933.61	11185.9	0.04	0
hCG16077.3	206569	probe	159	88	1/ IVT	60226	53.03	53.17	1135.73	0.04	0
hCG16078.3	152164	probe	4	34	1/ IVT	6314.26	35.01	5.15	180.35	0.05	64
hCG16081.3	191554	probe	51	85	1/ IVT	2005.15	-0.43	1.64	2005.15	2.32	1
hCG16082.3	146111	probe	96	121	1/ IVT	1170.4	6.09	0.95	192.33	0.17	64
hCG16083.3	186112	probe	227	98	1/ IVT	12350.9	17.62	10.9	700.86	0.07	0
hCG16084.3	173972	probe	204	154	1/ IVT	55154	71.47	48.69	771.71	0.04	0
hCG16087.3	162475	probe	31	9	1/ IVT	33585.4	84.71	27.39	396.49	0.04	0
hCG16088.3	145338	probe	203	102	1/ IVT	1855.56	9.68	1.64	191.67	0.11	0
hCG16089.3	176082	probe	64	142	1/ IVT	43410.2	74.5	35.41	582.72	0.04	0
hCG16091.4	144159	probe	138	13	1/ IVT	38149.5	50.45	33.68	756.23	0.04	0
hCG16091.4	134841	probe	188	65	1/ IVT	4872.95	25.83	4.3	188.64	0.05	0
hCG16092.3	126212	probe	226	52	1/ IVT	14357.2	56.23	12.67	255.32	0.04	0
hCG16094.2	103212	probe	167	87	1/ IVT	437.8	3.08	0.39	141.93	0.33	0
hCG16097.3	157577	probe	97	74	1/ IVT	26916.9	47.6	21.95	565.47	0.04	0
hCG16102.2	134467	probe	75	51	1/ IVT	73121.2	90.08	59.64	811.74	0.04	0
hCG16103.2	185312	probe	7	157	1/ IVT	2490.09	4.23	2.03	588.79	0.24	0
hCG16105.2	138036	probe	141	111	1/ IVT	4574.28	23.25	4.04	196.71	0.06	0
hCG16109.3	470727	probe	158	23	1/ IVT	307042	84.7	271.06	3624.97	0.04	0
hCG16110.3	113632	probe	11	110	1/ IVT	344.59	0.33	0.28	344.59	2.99	1
hCG16114.3	105249	probe	134	36	1/ IVT	214.93	-1.21	0.19	214.93	0.83	1
hCG16115.2	173470	probe	31	103	1/ IVT	25244.9	76.31	20.59	330.83	0.04	0
hCG16116.3	214870	probe	9	70	1/ IVT	933.1	6.69	0.76	139.55	0.15	0
hCG16118.2	202586	probe	62	105	1/ IVT	122.92	0.73	0.1	122.92	1.36	1
hCG16120.2	194423	probe	93	151	1/ IVT	25228.2	21.58	20.58	1168.99	0.06	0
hCG16121.3	211309	probe	164	58	1/ IVT	42819.5	105.39	37.8	406.28	0.04	64
hCG16127.2	112545	probe	111	101	1/ IVT	621.12	2.98	0.51	208.47	0.34	0
hCG16129.2	138257	probe	81	47	1/ IVT	1302.77	6.68	1.06	194.94	0.15	0
hCG16131.3	186944	probe	36	15	1/ IVT	3526.74	16.9	2.88	208.67	0.07	0
hCG16134.3	217732	probe	3	35	1/ IVT	420.02	2.42	0.34	173.9	0.42	0
hCG16134.3	151125	probe	175	47	1/ IVT	662.88	3.52	0.59	188.14	0.29	0
hCG16137.3	188609	probe	237	46	1/ IVT	28681.6	64.95	25.32	441.58	0.04	0
hCG16138.3	134853	probe	22	83	1/ IVT	166.9	-0.16	0.14	166.9	6.43	1
hCG16139.3	216014	probe	94	67	1/ IVT	20212.6	46.73	16.49	432.56	0.04	0
hCG16142.2	188301	probe	228	38	1/ IVT	8802.74	49.9	7.77	176.42	0.04	0
hCG16144.2	196310	probe	177	98	1/ IVT	18192.4	77.36	16.06	235.16	0.04	0
hCG16147.3	186803	probe	122	25	1/ IVT	149.19	1	0.13	149.19	1	1
hCG16148.3	192339	probe	170	44	1/ IVT	707.04	4.77	0.62	148.17	0.21	0
hCG16149.3	113259	probe	212	41	1/ IVT	1787.29	16.81	1.58	106.31	0.07	0
hCG16150.2	179061	probe	162	95	1/ IVT	124.02	0.09	0.11	124.02	10.7	1
hCG16155.3	121156	probe	82	58	1/ IVT	399679	77.39	326	5164.57	0.04	0
hCG16157.2	157032	probe	108	136	1/ IVT	4701.31	22.08	3.83	212.91	0.06	0
hCG16161.3	162558	probe	185	117	1/ IVT	76798.1	101.9	67.8	753.66	0.04	0
hCG16162.3	201218	probe	44	157	1/ IVT	18289.4	34.73	14.92	526.65	0.05	0
hCG16163.3	122607	probe	15	35	1/ IVT	3787.78	24.71	3.09	153.29	0.05	0
hCG16163.3	211759	probe	91	142	1/ IVT	5885.25	22.2	4.8	265.09	0.06	0
hCG16164.3	217302	probe	59	77	1/ IVT	2908.48	4.97	2.37	584.75	0.2	0
hCG16164.3	132880	probe	174	133	1/ IVT	16131.5	34.06	14.24	473.59	0.05	0
hCG16165.3	199267	probe	74	84	1/ IVT	387.92	-0.29	0.32	387.92	3.5	1
hCG16166.2	236237	probe	187	4	1/ IVT	5653.47	23.14	4.99	244.27	0.06	0
hCG16167.2	151042	probe	145	136	1/ IVT	471.75	3.68	0.42	128.09	0.27	0
hCG16168.3	149935	probe	4	39	1/ IVT	674.9	6.84	0.55	98.68	0.15	0
hCG16169.2	152994	probe	114	99	1/ IVT	4253.38	28.65	3.47	148.48	0.05	0
hCG16170.3	112066	probe	89	5	1/ IVT	234530	29.46	191.3	7961.51	0.05	0
hCG16171.3	215161	probe	212	2	1/ IVT	7291.24	25.35	6.44	287.67	0.05	0
hCG16172.3	121301	probe	23	1	1/ IVT	27410.3	83.74	22.36	327.33	0.04	0
hCG16173.3	138016	probe	69	109	1/ IVT	5912.11	18.87	4.82	313.37	0.06	0
hCG16173.3	221216	probe	135	22	1/ IVT	3315.18	5.99	2.93	553.85	0.17	0
hCG16174.3	116466	probe	25	113	1/ IVT	130.04	1.3	0.11	100.25	0.77	0
hCG16175.3	146556	probe	51	56	1/ IVT	9070.96	42.08	7.4	215.56	0.04	0
hCG16176.3	159953	probe	229	22	1/ IVT	4133.84	39.85	3.65	103.74	0.05	0
hCG16177.2	184463	probe	141	110	1/ IVT	3134.9	14.54	2.77	215.67	0.08	0
hCG16178.3	511171	probe	234	84	1/ IVT	31470.8	105.13	27.78	299.35	0.04	0
hCG16179.4	236022	probe	155	156	1/ IVT	700958	87.63	618.81	7999.15	0.04	0
hCG16180.3	198631	probe	147	106	1/ IVT	3407.93	22.21	3.01	153.42	0.06	0
hCG16181.2	117527	probe	236	68	1/ IVT	13174.8	46.46	11.63	283.59	0.04	0
hCG16182.4	216535	probe	17	48	1/ IVT	44118.5	74.46	35.99	592.52	0.04	0
hCG16182.4	225336	probe	149	133	1/ IVT	848.27	8.55	0.75	99.21	0.12	0
hCG16186.3	129457	probe	201	47	1/ IVT	2425.76	14.81	2.14	163.74	0.08	0
hCG16187.2	153383	probe	169	36	1/ IVT	197.98	-0.53	0.17	197.98	1.9	1
hCG16190.4	136651	probe	70	125	1/ IVT	819.49	-0.65	0.67	819.49	1.53	1
hCG16205.3	204458	probe	177	44	1/ IVT	167.26	-0.76	0.15	167.26	1.32	1
hCG16206.3	207810	probe	146	94	1/ IVT	17411.6	58.04	15.37	300	0.04	0
hCG16207.3	237034	probe	196	109	1/ IVT	394.88	7.24	0.35	54.55	0.14	0
hCG16208.3	172292	probe	131	93	1/ IVT	6346.67	6.04	5.6	1049.95	0.17	0
hCG16209.3	111149	probe	155	91	1/ IVT	1.42285e+06	88.03	1256.09	16162.5	0.04	0
hCG16210.3	166581	probe	125	155	1/ IVT	1407.93	6.45	1.24	218.35	0.16	0
hCG16212.3	104936	probe	83	156	1/ IVT	521.06	-0.17	0.43	521.06	5.79	1
hCG16213.3	199789	probe	216	68	1/ IVT	1927.25	15.73	1.7	122.51	0.07	0
hCG16214.4	174841	probe	211	144	1/ IVT	3649.35	4.29	3.22	850.25	0.24	0
hCG16216.3	162178	probe	156	135	1/ IVT	4926.19	16.77	4.35	293.69	0.07	0
hCG16217.2	103297	probe	107	83	1/ IVT	161.5	-0.47	0.13	161.5	2.13	1
hCG16221.2	183205	probe	225	92	1/ IVT	1138.93	12.02	1.01	94.77	0.09	0
hCG16222.2	203530	probe	229	7	1/ IVT	2486.75	11.84	2.2	210.06	0.09	0
hCG16223.4	102972	probe	7	37	1/ IVT	2816.19	11.41	2.3	246.82	0.09	0
hCG16225.4	105646	probe	12	27	1/ IVT	14250	24.86	11.62	573.18	0.05	0
hCG16225.4	707897	probe	131	135	1/ IVT	501.55	0.31	0.44	501.55	3.28	1
hCG16229.1	140651	probe	106	52	1/ IVT	168.59	-0.39	0.14	168.59	2.6	1
hCG16230.3	157574	probe	155	57	1/ IVT	10016.1	43.4	8.84	230.76	0.04	0
hCG16231.4	136298	probe	9	90	1/ IVT	314.05	1.91	0.26	164.36	0.52	0
hCG16232.2	206612	probe	27	72	1/ IVT	341698	128.63	278.71	2656.42	0.04	64
hCG16233.3	181112	probe	127	75	1/ IVT	1769.54	12.15	1.56	145.69	0.09	0
hCG16234.2	185114	probe	187	58	1/ IVT	28941.3	53.54	25.55	540.59	0.04	0
hCG16236.3	143564	probe	108	112	1/ IVT	158.8	0.41	0.13	158.8	2.43	1
hCG16236.3	180927	probe	209	50	1/ IVT	93.6	-1.33	0.08	93.6	0.76	1
hCG16238.3	119211	probe	132	92	1/ IVT	2816.28	10.03	2.49	280.83	0.11	0
hCG16239.2	172673	probe	187	33	1/ IVT	894.1	8.98	0.79	99.59	0.12	0
hCG16240.3	209614	probe	209	127	1/ IVT	644.45	0.68	0.57	644.45	1.46	1
hCG16241.2	196639	probe	156	107	1/ IVT	1438.66	10.49	1.27	137.2	0.1	0
hCG16241.2	127917	probe	161	57	1/ IVT	103.07	-0.5	0.09	103.07	1.98	1
hCG16243.3	162874	probe	137	114	1/ IVT	402.66	2.75	0.36	146.48	0.37	0
hCG16244.2	167559	probe	33	97	1/ IVT	5408.16	24.94	4.41	216.84	0.05	0
hCG16245.3	185676	probe	156	137	1/ IVT	1072.62	10.21	0.95	105.07	0.11	0
hCG16247.2	119853	probe	191	143	1/ IVT	99.33	0.14	0.09	99.33	7.37	1
hCG16248.3	182815	probe	69	7	1/ IVT	4369.56	13.75	3.56	317.79	0.08	0
hCG16250.2	131558	probe	161	150	1/ IVT	15836.8	64.05	13.98	247.25	0.04	0
hCG16254.3	188337	probe	162	8	1/ IVT	237.78	1.98	0.21	120.04	0.51	0
hCG16256.3	201310	probe	56	150	1/ IVT	1560.64	0	1.27	1560.64	5440.62	1
hCG16258.3	223304	probe	232	72	1/ IVT	3495.53	14.7	3.09	237.75	0.08	0
hCG16259.3	114538	probe	123	13	1/ IVT	4767.66	17.26	4.21	276.26	0.07	0
hCG16259.3	219437	probe	173	130	1/ IVT	1647.8	11.78	1.45	139.92	0.09	0
hCG16260.3	192039	probe	94	14	1/ IVT	950.77	-1.06	0.78	950.77	0.95	1
hCG16261.3	190308	probe	23	152	1/ IVT	13883.8	47.37	11.32	293.07	0.04	0
hCG16261.3	190904	probe	98	132	1/ IVT	2299.8	6.23	1.88	369.34	0.16	0
hCG16262.3	164817	probe	164	76	1/ IVT	21934	58.38	19.36	375.69	0.04	0
hCG16263.2	130322	probe	29	82	1/ IVT	320.78	1.94	0.26	165.27	0.52	0
hCG16264.2	192638	probe	90	15	1/ IVT	19833.6	25.47	16.18	778.83	0.05	0
hCG16266.3	188332	probe	85	15	1/ IVT	3572.78	6.35	2.91	562.5	0.16	0
hCG16283.3	193551	probe	134	54	1/ IVT	176.36	-0.83	0.16	176.36	1.21	1
hCG16285.3	206016	probe	42	75	1/ IVT	163044	108.23	132.99	1506.52	0.04	0
hCG16286.2	236969	probe	76	74	1/ IVT	283.94	-1.28	0.23	283.94	0.78	1
hCG16289.3	114238	probe	84	33	1/ IVT	565.83	6.2	0.46	91.19	0.17	0
hCG16291.3	160942	probe	66	8	1/ IVT	259.4	3.12	0.21	83.01	0.32	0
hCG16292.3	206278	probe	71	48	1/ IVT	12623.7	36.63	10.3	344.67	0.04	0
hCG16293.2	141482	probe	123	112	1/ IVT	3614.94	22.14	3.19	163.26	0.06	0
hCG16294.2	166650	probe	178	118	1/ IVT	6537.97	40.13	5.77	162.93	0.05	0
hCG16295.2	157517	probe	198	81	1/ IVT	47306.2	36.93	41.76	1280.93	0.05	0
hCG16296.2	108501	probe	75	155	1/ IVT	5439.13	9.38	4.44	579.69	0.11	0
hCG16299.3	234681	probe	150	108	1/ IVT	859.26	7.57	0.76	113.53	0.14	0
hCG16299.3	191456	probe	187	10	1/ IVT	132.8	1.09	0.12	121.68	0.92	0
hCG16300.3	201831	probe	13	79	1/ IVT	18700.4	51.19	15.25	365.3	0.04	0
hCG16301.2	106325	probe	70	12	1/ IVT	842.61	1.25	0.69	673.44	0.8	0
hCG16301.2	165607	probe	164	6	1/ IVT	95.46	0.28	0.08	95.46	3.52	1
hCG16302.3	213826	probe	32	143	1/ IVT	7400.43	28.88	6.04	256.28	0.05	0
hCG16303.4	112346	probe	56	115	1/ IVT	8491.72	33.44	6.93	253.93	0.05	0
hCG16304.4	166305	probe	151	66	1/ IVT	1342.04	2	1.18	672.19	0.5	0
hCG16305.3	111014	probe	191	147	1/ IVT	2050.22	2.24	1.81	913.29	0.45	0
hCG16307.3	204044	probe	123	73	1/ IVT	206053	83.74	181.9	2460.57	0.04	0
hCG16308.4	152491	probe	54	79	1/ IVT	24822.8	83.93	20.25	295.74	0.04	0
hCG16311.3	180242	probe	6	45	1/ IVT	741.88	4.1	0.61	180.79	0.25	0
hCG16312.3	185129	probe	113	84	1/ IVT	2037.2	9.77	1.66	208.55	0.11	0
hCG16313.3	144715	probe	172	3	1/ IVT	33511.6	74.55	29.58	449.49	0.04	0
hCG16314.3	223193	probe	63	65	1/ IVT	6316.92	31.73	5.15	199.09	0.05	0
hCG16314.3	178415	probe	234	123	1/ IVT	396.95	2.46	0.35	161.35	0.41	0
hCG16315.2	187456	probe	72	119	1/ IVT	296.92	2.12	0.24	140.24	0.47	0
hCG16316.4	160222	probe	118	76	1/ IVT	147.08	-0.46	0.12	147.08	2.17	1
hCG16317.2	176983	probe	150	141	1/ IVT	61876.4	66.1	54.62	936.11	0.04	0
hCG16318.3	158286	probe	106	5	1/ IVT	198018	62.18	161.51	3184.69	0.04	0
hCG16319.2	180465	probe	211	56	1/ IVT	9253.71	40.52	8.17	228.36	0.05	0
hCG16320.2	693917	probe	36	134	1/ IVT	35390.4	62.71	28.87	564.37	0.04	0
hCG16320.2	679160	probe	222	16	1/ IVT	57477.7	76.6	50.74	750.36	0.04	0
hCG16321.4	177780	probe	186	28	1/ IVT	32.3	-2.61	0.03	32.3	0.39	1
hCG16322.3	104901	probe	105	28	1/ IVT	265188	58.7	216.3	4517.84	0.04	0
hCG16323.2	184797	probe	133	142	1/ IVT	8672.51	16.58	7.66	523.08	0.07	0
hCG16324.3	128833	probe	145	150	1/ IVT	106.54	1.04	0.09	102.25	0.96	0
hCG16325.4	173237	probe	46	142	1/ IVT	348.01	-0.16	0.28	348.01	6.19	1
hCG16326.3	192798	probe	34	13	1/ IVT	57100.6	99.71	46.57	572.65	0.04	0
hCG16330.3	127581	probe	31	139	1/ IVT	373432	93.69	304.59	3985.86	0.04	0
hCG16335.3	199474	probe	115	118	1/ IVT	414.49	-0.46	0.34	414.49	2.15	1
hCG16337.2	109836	probe	204	125	1/ IVT	705.12	-0.29	0.62	705.12	3.43	1
hCG16339.1	119363	probe	46	27	1/ IVT	140501	80.27	114.6	1750.42	0.04	0
hCG16340.2	236646	probe	99	145	1/ IVT	110888	41.89	90.45	2647.02	0.04	0
hCG16342.2	133397	probe	224	136	1/ IVT	5311.74	8.79	4.69	604.01	0.12	0
hCG16351.2	119012	probe	186	125	1/ IVT	7704.08	48.51	6.8	158.82	0.04	0
hCG16353.3	190410	probe	63	157	1/ IVT	4409.64	18.44	3.6	239.16	0.06	0
hCG16354.2	190612	probe	99	89	1/ IVT	50782.9	37.43	41.42	1356.88	0.04	0
hCG16354.2	235457	probe	153	125	1/ IVT	6266.12	21.54	5.53	290.9	0.06	0
hCG16355.4	160438	probe	231	99	1/ IVT	1706.05	8.88	1.51	192.14	0.12	0
hCG16356.4	135572	probe	22	124	1/ IVT	21935.5	62.43	17.89	351.37	0.04	0
hCG16356.4	224084	probe	115	8	1/ IVT	2019.78	7.57	1.65	266.92	0.14	0
hCG16357.3	182181	probe	196	116	1/ IVT	5637.03	19.48	4.98	289.37	0.06	0
hCG16358.3	171928	probe	16	129	1/ IVT	205.21	2.16	0.17	94.85	0.46	0
hCG16360.2	123143	probe	84	55	1/ IVT	439.64	2.04	0.36	215.29	0.49	0
hCG16361.2	173408	probe	183	154	1/ IVT	1150.41	7.47	1.02	153.91	0.14	0
hCG16362.1	192528	probe	235	56	1/ IVT	163.34	1.21	0.14	134.88	0.83	0
hCG16363.1	123749	probe	237	39	1/ IVT	148.26	0.96	0.13	148.26	1.04	1
hCG16364.3	188807	probe	135	5	1/ IVT	299.73	-0.14	0.26	299.73	7.13	1
hCG16365.2	163252	probe	56	68	1/ IVT	329.72	-0.98	0.27	329.72	1.02	1
hCG16366.3	177389	probe	187	84	1/ IVT	916.81	9.94	0.81	92.23	0.11	0
hCG16367.1	119357	probe	54	39	1/ IVT	290.53	1.99	0.24	145.97	0.5	0
hCG16368.2	149192	probe	215	48	1/ IVT	4389.65	11.29	3.88	388.89	0.1	0
hCG16369.3	227601	probe	61	43	1/ IVT	556.06	4.28	0.45	129.83	0.24	0
hCG16370.2	125982	probe	177	25	1/ IVT	2575.48	8.07	2.27	319.06	0.13	0
hCG16371.3	119072	probe	44	61	1/ IVT	188.06	0.6	0.15	188.06	1.68	1
hCG16372.3	176899	probe	58	145	1/ IVT	875.76	3.92	0.71	223.13	0.26	64
hCG16373.2	116792	probe	172	24	1/ IVT	83.95	-2.39	0.07	83.95	0.42	1
hCG16376.3	115455	probe	65	83	1/ IVT	794.41	5.62	0.65	141.34	0.18	0
hCG16376.3	114701	probe	133	66	1/ IVT	2277.65	7	2.01	325.32	0.15	0
hCG16377.3	152631	probe	54	96	1/ IVT	28605.6	59.13	23.33	483.77	0.04	0
hCG16377.3	225120	probe	123	6	1/ IVT	5709.25	27.99	5.04	203.95	0.05	0
hCG16378.3	120138	probe	25	91	1/ IVT	193.88	1.26	0.16	154.31	0.8	0
hCG16380.3	200578	probe	211	78	1/ IVT	1.30572e+06	66.66	1152.69	19586.8	0.04	0
hCG16381.1	132007	probe	138	106	1/ IVT	422.51	-0.15	0.37	422.51	6.52	1
hCG16382.2	118163	probe	225	58	1/ IVT	87.74	0.43	0.08	87.74	2.31	1
hCG16383.3	161608	probe	157	143	1/ IVT	220442	76.8	194.61	2870.18	0.04	0
hCG16384.2	170211	probe	238	10	1/ IVT	12032.9	39.01	10.62	308.45	0.05	0
hCG16386.3	158610	probe	101	65	1/ IVT	3093.55	11.85	2.52	260.96	0.09	0
hCG16387.3	169900	probe	178	87	1/ IVT	233.94	1.88	0.21	124.41	0.53	0
hCG16392.3	215308	probe	21	44	1/ IVT	793.99	3.04	0.65	261.28	0.33	0
hCG16393.2	231142	probe	33	91	1/ IVT	733.01	4.89	0.6	149.85	0.21	0
hCG16397.3	196924	probe	203	55	1/ IVT	106.74	-0.32	0.09	106.74	3.15	1
hCG1639742.3	189520	probe	104	51	1/ IVT	44593.8	84.57	36.37	527.3	0.04	0
hCG1639748.3	208956	probe	36	5	1/ IVT	148285	89.26	120.95	1661.36	0.04	64
hCG1639753.2	130046	probe	183	37	1/ IVT	147.89	-0.23	0.13	147.89	4.26	1
hCG1639758.3	198421	probe	157	91	1/ IVT	16256.3	33.58	14.35	484.07	0.05	0
hCG1639759.3	234150	probe	132	108	1/ IVT	286.37	1.55	0.25	185.13	0.65	0
hCG1639760.2	139804	probe	165	112	1/ IVT	119.22	-0.68	0.11	119.22	1.46	1
hCG1639761.3	236041	probe	194	16	1/ IVT	578784	41.49	510.95	13948.4	0.05	0
hCG1639762.4	181304	probe	178	68	1/ IVT	3855.54	24.03	3.4	160.48	0.06	0
hCG1639763.4	107124	probe	149	149	1/ IVT	686.22	-0.11	0.61	686.22	9.3	1
hCG1639764.3	166394	probe	25	15	1/ IVT	3784.67	11.55	3.09	327.72	0.09	0
hCG1639765.4	157489	probe	114	134	1/ IVT	27836	45.76	22.7	608.25	0.04	0
hCG1639774.3	213590	probe	156	11	1/ IVT	26503.6	62.91	23.4	421.3	0.04	0
hCG1639775.4	230460	probe	26	2	1/ IVT	1.28786e+06	108.61	1050.44	11857.9	0.04	0
hCG1639777.3	211363	probe	11	8	1/ IVT	1.35294e+06	75.6	1103.54	17895.1	0.04	0
hCG1639778.4	172176	probe	125	51	1/ IVT	587.34	0.91	0.52	587.34	1.1	1
hCG1639778.4	148153	probe	229	75	1/ IVT	83228.5	47.85	73.47	1739.21	0.04	0
hCG1639781.2	174785	probe	152	22	1/ IVT	134299	51.77	118.56	2594.38	0.04	0
hCG1639782.2	148927	probe	154	19	1/ IVT	14132	62.32	12.48	226.77	0.04	0
hCG1639794.4	102647	probe	126	132	1/ IVT	223.95	0.34	0.2	223.95	2.92	1
hCG1639795.3	142290	probe	212	22	1/ IVT	339131	69.09	299.38	4908.33	0.04	0
hCG1639800.3	188530	probe	167	8	1/ IVT	159320	55.18	140.65	2887.11	0.04	0
hCG1639801.2	105988	probe	43	56	1/ IVT	17282.5	51.87	14.1	333.19	0.04	0
hCG1639802.3	236688	probe	157	113	1/ IVT	863975	94.38	762.72	9153.8	0.04	0
hCG1639803.3	133993	probe	9	145	1/ IVT	1207.6	12.67	0.98	95.34	0.09	0
hCG1639804.2	166213	probe	231	61	1/ IVT	851.14	12.38	0.75	68.75	0.09	0
hCG1639805.4	192498	probe	81	32	1/ IVT	191.24	-0.52	0.16	191.24	1.92	1
hCG1639808.3	141912	probe	84	112	1/ IVT	7674.05	51.1	6.26	150.17	0.04	0
hCG1639813.3	230017	probe	73	50	1/ IVT	352.22	2.08	0.29	169.39	0.48	0
hCG1639814.3	153119	probe	22	5	1/ IVT	55970.7	81.87	45.65	683.63	0.04	0
hCG1639814.3	102388	probe	30	127	1/ IVT	5470.99	22.83	4.46	239.61	0.06	0
hCG1639814.3	140336	probe	103	128	1/ IVT	5409.31	22.76	4.41	237.63	0.06	0
hCG1639814.3	117532	probe	217	150	1/ IVT	7314.27	10.74	6.46	681.35	0.1	0
hCG1639815.3	236295	probe	99	159	1/ IVT	201453	48.09	164.32	4189.39	0.04	0
hCG1639816.4	215505	probe	124	15	1/ IVT	359.13	0.77	0.32	359.13	1.29	1
hCG1639823.3	183514	probe	194	156	1/ IVT	85.81	0.61	0.08	85.81	1.64	1
hCG1639824.4	191159	probe	96	68	1/ IVT	1290.74	1.49	1.05	864.06	0.67	0
hCG1639826.3	140541	probe	179	115	1/ IVT	105.44	-0.03	0.09	105.44	30.29	1
hCG1639829.3	175485	probe	98	34	1/ IVT	27949.1	52.77	22.8	529.68	0.04	0
hCG1639830.3	196106	probe	179	10	1/ IVT	576902	116.45	509.29	4954.27	0.04	0
hCG1639834.2	236772	probe	216	117	1/ IVT	816516	61.74	720.82	13225.8	0.04	0
hCG1639835.2	175043	probe	149	79	1/ IVT	1.07114e+06	92.64	945.6	11562.7	0.04	0
hCG1639837.1	161641	probe	156	67	1/ IVT	375.45	2.97	0.33	126.57	0.34	0
hCG1639840.3	138947	probe	63	121	1/ IVT	48794.8	77.81	39.8	627.09	0.04	0
hCG1639841.2	104400	probe	52	114	1/ IVT	42535.6	61.11	34.69	696.01	0.04	0
hCG1639844.2	106827	probe	182	68	1/ IVT	2528.54	19.04	2.23	132.82	0.07	0
hCG1639847.4	154657	probe	143	64	1/ IVT	128.56	0.93	0.11	128.56	1.08	1
hCG1639849.3	101814	probe	193	139	1/ IVT	163.51	0.44	0.14	163.51	2.3	1
hCG1639850.2	194586	probe	229	72	1/ IVT	126.04	-1.04	0.11	126.04	0.97	1
hCG1639851.3	231280	probe	124	23	1/ IVT	5740.49	25.4	5.07	225.99	0.05	0
hCG1639852.4	173717	probe	77	112	1/ IVT	405248	91.63	330.54	4422.83	0.04	0
hCG1639853.3	125060	probe	178	130	1/ IVT	178.25	-0.16	0.16	178.25	6.29	1
hCG1639854.3	172111	probe	16	9	1/ IVT	716.73	5.86	0.58	122.27	0.17	0
hCG1639856.4	236685	probe	64	96	1/ IVT	4793.46	11.49	3.91	417.2	0.09	0
hCG1639857.3	230745	probe	150	155	1/ IVT	222.77	-0.21	0.2	222.77	4.66	1
hCG1639858.2	178818	probe	51	58	1/ IVT	47765.7	73.96	38.96	645.86	0.04	0
hCG1639859.3	109498	probe	73	132	1/ IVT	232.73	1.6	0.19	145.83	0.63	0
hCG1639863.2	170669	probe	128	133	1/ IVT	145805	69.81	128.72	2088.65	0.04	0
hCG1639864.2	138062	probe	213	15	1/ IVT	132.58	-0.91	0.12	132.58	1.1	1
hCG1639865.3	174432	probe	67	66	1/ IVT	2424.3	12.53	1.98	193.53	0.09	0
hCG1639867.3	129325	probe	192	153	1/ IVT	165.16	0.98	0.15	165.16	1.02	1
hCG1639870.3	236666	probe	64	69	1/ IVT	1.31083e+06	83.43	1069.18	15712.5	0.04	4
hCG1639872.2	228458	probe	134	149	1/ IVT	92.95	-0.42	0.08	92.95	2.35	1
hCG1639874.3	134753	probe	182	52	1/ IVT	4181.13	10.85	3.69	385.18	0.1	0
hCG1639877.3	119116	probe	8	19	1/ IVT	51092.2	61.07	41.67	836.59	0.04	0
hCG1639877.3	218126	probe	47	89	1/ IVT	98820.6	60.47	80.6	1634.23	0.04	0
hCG1639877.3	187532	probe	228	155	1/ IVT	213695	36.2	188.65	5902.96	0.05	0
hCG1639884.4	234461	probe	227	42	1/ IVT	355192	80.87	313.56	4392.23	0.04	0
hCG1639886.3	704559	probe	103	145	1/ IVT	136.23	-0.96	0.11	136.23	1.04	1
hCG1639889.2	115598	probe	102	129	1/ IVT	178.86	-0.86	0.15	178.86	1.16	1
hCG1639889.2	173149	probe	170	16	1/ IVT	182.45	0.48	0.16	182.45	2.09	1
hCG1639891.4	110507	probe	63	151	1/ IVT	212204	64.15	173.09	3307.93	0.04	0
hCG1639895.2	129246	probe	223	93	1/ IVT	409110	105.64	361.16	3872.73	0.04	0
hCG16399.3	168210	probe	17	35	1/ IVT	17638.4	67.23	14.39	262.36	0.04	0
hCG16399.3	235086	probe	24	81	1/ IVT	432.46	3.59	0.35	120.51	0.28	0
hCG16399.3	113948	probe	165	126	1/ IVT	97.74	-0.22	0.09	97.74	4.56	1
hCG1639904.4	179797	probe	150	117	1/ IVT	15725.3	52.38	13.88	300.22	0.04	0
hCG1639905.3	196635	probe	4	12	1/ IVT	365.67	3.9	0.3	93.66	0.26	0
hCG1639908.3	230868	probe	127	62	1/ IVT	67852.2	25.28	59.9	2684.14	0.06	0
hCG1639909.4	208764	probe	199	86	1/ IVT	29829.7	32.14	26.33	928.25	0.05	0
hCG1639912.3	203443	probe	38	93	1/ IVT	2807.78	20.19	2.29	139.07	0.06	0
hCG1639915.3	153248	probe	130	112	1/ IVT	18430.5	44.15	16.27	417.41	0.04	0
hCG1639921.3	230930	probe	72	59	1/ IVT	2930.47	13.99	2.39	209.47	0.08	0
hCG1639925.3	121459	probe	234	88	1/ IVT	6899.23	42.38	6.09	162.78	0.04	0
hCG1639927.2	197479	probe	83	131	1/ IVT	1543.23	5.05	1.26	305.82	0.2	0
hCG1639935.2	146600	probe	121	54	1/ IVT	730390	46.24	644.79	15796.2	0.04	0
hCG1639936.4	142040	probe	128	122	1/ IVT	6013.43	24.15	5.31	249.05	0.06	0
hCG1639937.3	228181	probe	117	37	1/ IVT	3207.53	11.18	2.62	286.83	0.1	0
hCG1639941.3	195075	probe	97	97	1/ IVT	519.18	3.03	0.42	171.45	0.33	0
hCG1639943.3	177201	probe	158	91	1/ IVT	4489.01	17.68	3.96	253.88	0.07	0
hCG1639947.2	209694	probe	111	64	1/ IVT	2739.43	19.73	2.23	138.83	0.06	0
hCG1639951.4	114661	probe	63	158	1/ IVT	8599.31	46.63	7.01	184.43	0.04	0
hCG1639952.3	182686	probe	206	91	1/ IVT	137.03	-1.44	0.12	137.03	0.7	1
hCG1639958.2	102835	probe	73	139	1/ IVT	560.35	3.06	0.46	183.4	0.33	0
hCG1639958.2	170722	probe	108	148	1/ IVT	45393.7	46.39	37.03	978.49	0.04	0
hCG1639960.4	147635	probe	30	24	1/ IVT	349.37	2.24	0.28	156.08	0.45	0
hCG1639963.3	209342	probe	184	95	1/ IVT	22131.3	45.32	19.54	488.36	0.04	0
hCG1639965.3	173159	probe	142	66	1/ IVT	144187	63.66	127.29	2264.98	0.04	0
hCG1639967.3	209040	probe	97	8	1/ IVT	3022.46	9.66	2.47	313.02	0.11	0
hCG1639969.4	236811	probe	223	123	1/ IVT	172274	53.11	152.08	3243.68	0.04	0
hCG1639973.3	228252	probe	185	35	1/ IVT	87.09	-0.3	0.08	87.09	3.36	1
hCG1639976.2	132306	probe	91	155	1/ IVT	301.01	-1.48	0.25	301.01	0.68	1
hCG1639985.5	191106	probe	77	16	1/ IVT	112201	52.11	91.52	2153.08	0.04	0
hCG1639989.3	154130	probe	119	74	1/ IVT	92.45	-1.58	0.08	92.45	0.63	1
hCG1639991.1	185838	probe	195	53	1/ IVT	536.21	6.37	0.47	84.15	0.16	0
hCG1639994.3	202350	probe	72	81	1/ IVT	138777	62.08	113.19	2235.52	0.04	0
hCG1640000.4	107682	probe	158	141	1/ IVT	58731.7	38.94	51.85	1508.29	0.05	0
hCG1640002.3	232940	probe	35	130	1/ IVT	164.46	-0.41	0.13	164.46	2.43	1
hCG1640003.3	163595	probe	11	118	1/ IVT	525.96	0.29	0.43	525.96	3.48	1
hCG1640011.2	210030	probe	30	41	1/ IVT	19572.3	45.57	15.96	429.47	0.04	0
hCG1640012.3	236834	probe	79	64	1/ IVT	5826.13	24.44	4.75	238.4	0.05	0
hCG1640013.4	211059	probe	130	147	1/ IVT	554.23	3.79	0.49	146.37	0.27	0
hCG1640013.4	191061	probe	144	35	1/ IVT	192993	85.65	170.37	2253.25	0.04	0
hCG1640013.4	111793	probe	155	143	1/ IVT	345.09	-0.6	0.3	345.09	1.66	1
hCG1640014.3	198384	probe	107	2	1/ IVT	12665	23.46	10.33	539.79	0.06	0
hCG1640018.3	167621	probe	227	108	1/ IVT	55371.7	79.92	48.88	692.87	0.04	0
hCG1640025.4	106063	probe	79	144	1/ IVT	550.85	1.08	0.45	511.95	0.93	0
hCG1640027.3	236365	probe	187	111	1/ IVT	43837.9	80.74	38.7	542.98	0.04	0
hCG1640036.4	118278	probe	12	41	1/ IVT	19433.5	37.37	15.85	519.99	0.04	0
hCG1640042.3	166111	probe	6	132	1/ IVT	1555.23	10.36	1.27	150.18	0.1	0
hCG1640045.3	176065	probe	229	14	1/ IVT	12136.5	16.95	10.71	715.86	0.07	0
hCG1640047.3	139703	probe	205	119	1/ IVT	10976.9	42.6	9.69	257.67	0.04	0
hCG1640052.2	162615	probe	37	111	1/ IVT	294327	80.68	240.07	3648.01	0.04	0
hCG1640053.3	193415	probe	113	150	1/ IVT	415.25	-1.35	0.34	415.25	0.74	1
hCG1640057.3	129598	probe	225	150	1/ IVT	131.15	-0.22	0.12	131.15	4.46	1
hCG1640060.2	176986	probe	69	75	1/ IVT	445.93	2.73	0.36	163.08	0.37	0
hCG1640061.1	120119	probe	113	156	1/ IVT	11173.9	34.84	9.11	320.69	0.05	0
hCG1640065.3	202391	probe	115	47	1/ IVT	162.74	0.56	0.13	162.74	1.79	1
hCG1640067.4	212151	probe	174	56	1/ IVT	4119.88	26.38	3.64	156.2	0.05	0
hCG1640068.3	207168	probe	16	19	1/ IVT	2520.23	16.83	2.06	149.79	0.07	0
hCG1640068.3	184902	probe	25	41	1/ IVT	332.37	0.46	0.27	332.37	2.17	1
hCG1640069.2	230241	probe	216	156	1/ IVT	5106.49	29.89	4.51	170.82	0.05	0
hCG1640071.3	185920	probe	53	119	1/ IVT	143.43	-0.47	0.12	143.43	2.14	1
hCG1640072.3	104237	probe	97	134	1/ IVT	16824.4	49.62	13.72	339.05	0.04	0
hCG1640075.3	236782	probe	5	147	1/ IVT	19626	66.92	16.01	293.27	0.04	0
hCG1640077.3	151956	probe	189	63	1/ IVT	2064.31	28.06	1.82	73.56	0.05	0
hCG1640092.2	183555	probe	151	69	1/ IVT	64350.2	98.25	56.81	654.93	0.04	0
hCG1640093.2	125050	probe	73	42	1/ IVT	36879.2	74.15	30.08	497.37	0.04	0
hCG1640093.2	165349	probe	234	127	1/ IVT	3817	20.9	3.37	182.63	0.06	0
hCG1640095.3	116310	probe	164	143	1/ IVT	452.06	3.44	0.4	131.23	0.29	0
hCG1640096.3	232399	probe	92	146	1/ IVT	2648.07	18.16	2.16	145.8	0.07	0
hCG1640098.1	159383	probe	22	36	1/ IVT	31612.7	46.44	25.79	680.69	0.04	0
hCG16401.4	108594	probe	44	84	1/ IVT	77307.5	82.67	63.06	935.15	0.04	0
hCG1640102.3	117549	probe	58	26	1/ IVT	199.67	-0.77	0.16	199.67	1.29	1
hCG1640106.3	158959	probe	88	47	1/ IVT	143.76	0.17	0.12	143.76	5.81	1
hCG1640107.4	236292	probe	39	14	1/ IVT	9929.86	45.55	8.1	217.98	0.04	0
hCG1640108.2	236414	probe	15	157	1/ IVT	13075.8	45.33	10.67	288.49	0.04	0
hCG1640109.5	135636	probe	162	105	1/ IVT	189989	72.99	167.72	2603.03	0.04	0
hCG1640115.4	236049	probe	119	142	1/ IVT	332760	56.24	271.42	5916.65	0.04	0
hCG1640117.2	236507	probe	196	16	1/ IVT	834062	25.16	736.31	33149.5	0.06	0
hCG1640120.3	212953	probe	167	7	1/ IVT	3627.26	7.43	3.2	487.93	0.14	0
hCG1640126.3	134555	probe	151	87	1/ IVT	513941	68.88	453.71	7461.37	0.04	0
hCG1640127.4	164694	probe	150	122	1/ IVT	29148.5	68.58	25.73	425.04	0.04	0
hCG1640128.4	236704	probe	34	45	1/ IVT	27707.9	58.43	22.6	474.18	0.04	0
hCG1640129.2	317016	probe	77	131	1/ IVT	15619.6	79.12	12.74	197.43	0.04	64
hCG1640135.3	198472	probe	184	70	1/ IVT	83082.9	105.86	73.35	784.81	0.04	0
hCG1640137.2	180014	probe	214	32	1/ IVT	373806	66.49	330	5622.39	0.04	0
hCG1640139.4	214065	probe	184	32	1/ IVT	187.57	-1.25	0.17	187.57	0.8	1
hCG1640142.2	144432	probe	12	67	1/ IVT	1043.37	6.97	0.85	149.69	0.15	0
hCG1640143.3	138666	probe	225	88	1/ IVT	117.87	1.3	0.1	91.01	0.77	0
hCG1640151.4	708204	probe	50	10	1/ IVT	269.88	1.76	0.22	153.45	0.57	0
hCG1640151.4	201377	probe	77	92	1/ IVT	5679.22	32.19	4.63	176.41	0.05	0
hCG1640153.3	101039	probe	75	107	1/ IVT	19870	69.52	16.21	285.82	0.04	0
hCG1640160.3	178869	probe	210	103	1/ IVT	13517.7	38.63	11.93	349.97	0.05	0
hCG1640162.3	136226	probe	91	90	1/ IVT	13501.8	29.22	11.01	462.08	0.05	0
hCG1640164.2	257484	probe	215	121	1/ IVT	297.82	-0.05	0.26	297.82	20.58	1
hCG1640167.4	169951	probe	88	144	1/ IVT	1.50172e+06	33.12	1224.88	45339.3	0.05	4
hCG1640167.4	172896	probe	138	30	1/ IVT	1.6658e+06	52.41	1470.56	31784.3	0.04	0
hCG1640167.4	162103	probe	212	94	1/ IVT	1.96839e+06	61.45	1737.69	32030.1	0.04	4
hCG1640168.4	168582	probe	238	65	1/ IVT	414.94	1.42	0.37	292.01	0.7	0
hCG1640169.4	164735	probe	59	13	1/ IVT	19270.7	17.79	15.72	1083.33	0.07	0
hCG1640170.3	124083	probe	37	145	1/ IVT	650467	109.98	530.56	5914.23	0.04	64
hCG1640173.4	165595	probe	134	69	1/ IVT	1.36329e+06	90.11	1203.51	15128.9	0.04	0
hCG1640174.3	110745	probe	164	154	1/ IVT	845649	85.96	746.54	9837.24	0.04	0
hCG1640178.3	175806	probe	4	98	1/ IVT	6688.36	18.38	5.46	363.94	0.07	0
hCG1640179.3	193509	probe	146	153	1/ IVT	3930.85	24.06	3.47	163.4	0.06	0
hCG1640180.3	206172	probe	11	41	1/ IVT	6993.8	22.31	5.7	313.51	0.06	0
hCG1640181.3	186068	probe	54	97	1/ IVT	4609.72	14.47	3.76	318.59	0.08	0
hCG1640184.3	151134	probe	18	62	1/ IVT	19453.3	35.27	15.87	551.63	0.05	0
hCG1640185.2	143414	probe	23	66	1/ IVT	2708.8	12.77	2.21	212.05	0.09	0
hCG1640186.3	143996	probe	93	17	1/ IVT	382.5	-1.16	0.31	382.5	0.87	1
hCG1640192.3	105900	probe	135	74	1/ IVT	21488	29.35	18.97	732.02	0.05	0
hCG1640193.2	177346	probe	16	12	1/ IVT	287.66	-0.65	0.23	287.66	1.53	1
hCG1640195.4	229147	probe	157	50	1/ IVT	4915.24	23.38	4.34	210.19	0.06	0
hCG16402.2	116004	probe	24	4	1/ IVT	24135.3	99.5	19.69	242.57	0.04	64
hCG1640203.1	101962	probe	137	132	1/ IVT	843.02	9.12	0.74	92.43	0.12	0
hCG1640204.3	196405	probe	75	37	1/ IVT	19001.9	57.44	15.5	330.83	0.04	0
hCG1640206.2	167659	probe	199	114	1/ IVT	456.93	4.92	0.4	92.94	0.21	0
hCG1640214.4	135137	probe	58	154	1/ IVT	509.14	0.53	0.42	509.14	1.9	1
hCG1640214.4	145154	probe	72	114	1/ IVT	24195.5	86.01	19.74	281.3	0.04	0
hCG1640216.2	216793	probe	9	24	1/ IVT	82.33	-3.03	0.07	82.33	0.33	131073
hCG1640219.2	228665	probe	34	121	1/ IVT	277.95	0.49	0.23	277.95	2.05	1
hCG1640221.2	115127	probe	195	154	1/ IVT	6994.03	66.54	6.17	105.12	0.04	0
hCG1640224.3	232839	probe	104	133	1/ IVT	2747.55	15.26	2.24	180.03	0.07	0
hCG1640225.5	165754	probe	108	89	1/ IVT	331.37	1.09	0.27	305.11	0.92	0
hCG1640228.3	208122	probe	84	151	1/ IVT	424170	54.55	345.98	7775.56	0.04	0
hCG1640229.2	182432	probe	175	111	1/ IVT	1577.47	11.08	1.39	142.42	0.1	0
hCG1640230.2	137388	probe	27	128	1/ IVT	10501.4	8.67	8.57	1210.6	0.12	0
hCG1640234.4	185546	probe	235	154	1/ IVT	24673.2	39.91	21.78	618.17	0.05	0
hCG1640242.2	172553	probe	88	106	1/ IVT	817.18	1.31	0.67	625.58	0.77	0
hCG1640242.2	103703	probe	204	15	1/ IVT	7541.96	43.91	6.66	171.75	0.04	0
hCG1640247.3	236563	probe	173	32	1/ IVT	17849.4	62.66	15.76	284.88	0.04	0
hCG1640251.4	228101	probe	217	70	1/ IVT	1908.82	16.38	1.69	116.5	0.07	0
hCG1640255.3	223165	probe	219	108	1/ IVT	435.74	-0.22	0.38	435.74	4.64	1
hCG1640265.1	161418	probe	222	82	1/ IVT	379120	107.96	334.69	3511.81	0.04	0
hCG1640272.3	179608	probe	129	146	1/ IVT	12812	36.93	11.31	346.94	0.05	0
hCG1640273.3	168047	probe	139	68	1/ IVT	220.8	1.76	0.19	125.12	0.57	0
hCG1640275.3	180602	probe	65	59	1/ IVT	4917.57	20.47	4.01	240.21	0.06	0
hCG1640280.3	136300	probe	25	94	1/ IVT	4930.78	16.35	4.02	301.55	0.07	0
hCG1640280.3	163372	probe	225	146	1/ IVT	92.9	-0.6	0.08	92.9	1.67	1
hCG1640282.3	142074	probe	176	151	1/ IVT	632198	107.94	558.1	5856.75	0.04	64
hCG1640288.2	114691	probe	231	66	1/ IVT	187.79	1.9	0.17	98.59	0.53	0
hCG1640289.5	181598	probe	153	147	1/ IVT	2.1426e+06	78.37	1891.49	27338.5	0.04	4
hCG1640290.3	140231	probe	44	81	1/ IVT	243.14	1.07	0.2	226.66	0.93	0
hCG1640291.2	187871	probe	185	119	1/ IVT	36083.5	84.07	31.85	429.22	0.04	0
hCG1640293.1	177496	probe	96	17	1/ IVT	506.45	-0.53	0.41	506.45	1.9	1
hCG1640296.3	230384	probe	64	49	1/ IVT	27540.8	49.43	22.46	557.15	0.04	0
hCG1640298.2	181362	probe	97	7	1/ IVT	9743.33	24.93	7.95	390.84	0.05	0
hCG1640299.3	177625	probe	22	34	1/ IVT	465.56	3.5	0.38	133.2	0.29	0
hCG1640300.3	155962	probe	76	47	1/ IVT	393.12	1.67	0.32	235.14	0.6	0
hCG1640304.3	165370	probe	31	66	1/ IVT	279943	69.66	228.34	4018.98	0.04	0
hCG1640307.3	186589	probe	174	150	1/ IVT	9035.82	56.94	7.98	158.68	0.04	0
hCG1640313.3	101403	probe	202	35	1/ IVT	132.45	0.02	0.12	132.45	47.84	1
hCG1640315.2	148804	probe	191	61	1/ IVT	899.67	5.77	0.79	155.79	0.18	0
hCG1640319.2	145025	probe	5	93	1/ IVT	351.99	2.22	0.29	158.87	0.45	0
hCG1640325.2	119762	probe	116	137	1/ IVT	198.92	0.37	0.16	198.92	2.71	1
hCG1640327.4	236396	probe	95	132	1/ IVT	13186.2	18.6	10.76	708.82	0.06	0
hCG1640328.4	221686	probe	9	83	1/ IVT	192.86	1.26	0.16	153.3	0.8	0
hCG1640329.4	124334	probe	238	29	1/ IVT	279.39	0.78	0.25	279.39	1.28	1
hCG1640331.3	201584	probe	164	141	1/ IVT	388.83	3.13	0.34	124.26	0.32	64
hCG1640332.3	234596	probe	114	42	1/ IVT	658.85	3.63	0.54	181.28	0.28	0
hCG1640337.4	191433	probe	181	26	1/ IVT	129153	71.15	114.02	1815.3	0.04	0
hCG1640339.1	170405	probe	52	27	1/ IVT	1872.07	-0.67	1.53	1872.07	1.49	1
hCG1640341.3	147519	probe	225	62	1/ IVT	317.64	2.02	0.28	157.25	0.5	0
hCG1640344.3	193773	probe	119	91	1/ IVT	70.84	0.07	0.06	70.84	15.29	1
hCG1640346.4	130983	probe	34	103	1/ IVT	1256.58	-1.07	1.02	1256.58	0.94	1
hCG1640349.4	713500	probe	148	69	1/ IVT	125.8	0.39	0.11	125.8	2.53	1
hCG1640359.3	167552	probe	225	109	1/ IVT	265.02	0.18	0.23	265.02	5.67	1
hCG1640360.4	236634	probe	64	82	1/ IVT	16239.9	12.6	13.25	1288.58	0.09	0
hCG1640364.3	233899	probe	37	94	1/ IVT	166.4	0.78	0.14	166.4	1.29	1
hCG1640369.4	218065	probe	132	121	1/ IVT	232.67	-0.01	0.21	232.67	96.13	1
hCG1640369.4	128812	probe	175	104	1/ IVT	12204.2	51.2	10.77	238.39	0.04	0
hCG1640370.5	148160	probe	34	114	1/ IVT	424457	89.46	346.21	4744.64	0.04	0
hCG1640375.3	194328	probe	205	107	1/ IVT	205.79	0.97	0.18	205.79	1.03	1
hCG1640375.3	183904	probe	230	78	1/ IVT	2359.59	11.76	2.08	200.62	0.09	0
hCG1640376.3	328080	probe	62	85	1/ IVT	5586.49	7.16	4.56	780.4	0.14	0
hCG1640378.3	236725	probe	151	146	1/ IVT	1549.73	8.62	1.37	179.78	0.12	0
hCG1640379.3	103678	probe	62	12	1/ IVT	3750.6	16.89	3.06	222.08	0.07	0
hCG1640387.2	162340	probe	235	6	1/ IVT	90.96	-0.67	0.08	90.96	1.5	1
hCG1640390.2	122051	probe	98	11	1/ IVT	29798.1	24.2	24.3	1231.36	0.05	0
hCG1640393.4	111318	probe	130	45	1/ IVT	42425.8	41.18	37.45	1030.3	0.05	0
hCG1640396.3	10712347	probe	210	72	1/ IVT	615.36	4.07	0.54	151.13	0.25	0
hCG16404.2	120701	probe	7	127	1/ IVT	9572.77	35.92	7.81	266.47	0.05	0
hCG1640404.3	112235	probe	48	158	1/ IVT	193.97	1.33	0.16	145.96	0.75	0
hCG1640406.3	122823	probe	197	35	1/ IVT	63094.8	81.23	55.7	776.74	0.04	0
hCG1640408.3	198106	probe	38	110	1/ IVT	80702.7	80.67	65.83	1000.42	0.04	0
hCG1640408.3	219949	probe	116	24	1/ IVT	1457.34	30.5	1.19	47.78	0.05	0
hCG1640410.3	186250	probe	42	106	1/ IVT	1312.63	3.21	1.07	409.26	0.31	0
hCG1640414.2	174717	probe	52	110	1/ IVT	141.29	-0.89	0.12	141.29	1.12	1
hCG1640415.3	109024	probe	105	37	1/ IVT	537971	70.37	438.8	7644.62	0.04	0
hCG1640416.3	131502	probe	111	125	1/ IVT	531.84	-0.71	0.43	531.84	1.4	1
hCG1640416.3	713561	probe	194	96	1/ IVT	1036.17	2.72	0.91	381.51	0.37	0
hCG1640418.3	487291	probe	175	155	1/ IVT	1303.34	4.54	1.15	287.01	0.22	0
hCG1640430.3	185343	probe	21	70	1/ IVT	1251.38	26.36	1.02	47.48	0.05	0
hCG1640438.2	158533	probe	194	94	1/ IVT	612.38	5.31	0.54	115.32	0.19	0
hCG1640439.4	214093	probe	172	59	1/ IVT	20544.9	64.18	18.14	320.14	0.04	0
hCG1640439.4	206951	probe	228	121	1/ IVT	42379.7	73.12	37.41	579.56	0.04	0
hCG1640443.3	131410	probe	174	14	1/ IVT	920.72	6.45	0.81	142.75	0.16	0
hCG1640445.2	143499	probe	218	57	1/ IVT	336.35	-0.34	0.3	336.35	2.91	1
hCG1640446.3	272562	probe	109	111	1/ IVT	363.11	1.61	0.3	225.17	0.62	0
hCG1640447.4	183458	probe	137	156	1/ IVT	6216.6	54.45	5.49	114.17	0.04	0
hCG1640448.3	200366	probe	1	138	1/ IVT	5428.31	20.11	4.43	269.98	0.06	0
hCG1640448.3	217625	probe	88	97	1/ IVT	789.03	1.09	0.64	725.4	0.92	0
hCG1640448.3	235942	probe	236	45	1/ IVT	775.02	7.42	0.68	104.44	0.14	0
hCG1640449.3	158974	probe	204	38	1/ IVT	5043.8	27.67	4.45	182.25	0.05	0
hCG1640452.2	133807	probe	93	143	1/ IVT	510.87	5.88	0.42	86.82	0.17	0
hCG1640453.1	106111	probe	108	99	1/ IVT	561183	78.65	457.73	7135.46	0.04	0
hCG1640454.2	147811	probe	191	4	1/ IVT	1731.88	-0.7	1.53	1731.88	1.42	1
hCG1640456.2	236367	probe	103	110	1/ IVT	448.12	2.83	0.37	158.53	0.36	0
hCG1640457.4	224206	probe	48	58	1/ IVT	195.62	0.08	0.16	195.62	12.97	1
hCG1640458.3	148152	probe	215	102	1/ IVT	796.88	8.7	0.7	91.63	0.12	0
hCG1640462.3	198737	probe	181	144	1/ IVT	95546.1	82.57	84.35	1157.17	0.04	0
hCG1640463.3	122554	probe	188	47	1/ IVT	30939.4	32.22	27.31	960.39	0.05	0
hCG1640464.3	225617	probe	216	109	1/ IVT	442.63	2.45	0.39	180.51	0.41	0
hCG1640465.2	193947	probe	205	63	1/ IVT	24149	66.87	21.32	361.14	0.04	0
hCG1640466.1	174536	probe	172	52	1/ IVT	19129.9	27.08	16.89	706.34	0.05	0
hCG1640467.3	179147	probe	26	75	1/ IVT	2211.97	1.32	1.8	1676.32	0.76	0
hCG1640468.2	126600	probe	232	102	1/ IVT	3059.12	19.8	2.7	154.5	0.06	0
hCG1640477.2	137708	probe	133	154	1/ IVT	1.02045e+06	87.59	900.85	11650.4	0.04	0
hCG1640483.3	148940	probe	223	79	1/ IVT	6516.32	26.24	5.75	248.3	0.05	0
hCG1640484.2	148420	probe	112	19	1/ IVT	41042.7	63.65	33.48	644.86	0.04	0
hCG1640484.2	468490	probe	208	52	1/ IVT	671.88	-0.09	0.59	671.88	10.61	1
hCG1640485.1	206232	probe	74	94	1/ IVT	7345.56	30.3	5.99	242.46	0.05	0
hCG1640486.2	150786	probe	58	2	1/ IVT	1.64567e+06	52.67	1342.3	31242.9	0.04	0
hCG1640487.3	111742	probe	117	48	1/ IVT	9902.81	49.05	8.08	201.89	0.04	0
hCG1640490.3	105011	probe	6	138	1/ IVT	597.19	6.49	0.49	92.04	0.16	0
hCG1640491.4	136906	probe	207	48	1/ IVT	19517.6	40.4	17.23	483.15	0.05	0
hCG1640493.3	125158	probe	114	123	1/ IVT	228.5	-1.39	0.19	228.5	0.72	1
hCG1640498.3	177124	probe	1	125	1/ IVT	9352.45	50.2	7.63	186.31	0.04	0
hCG1640498.3	184691	probe	226	132	1/ IVT	5729.73	54.4	5.06	105.32	0.04	0
hCG1640499.4	179267	probe	154	56	1/ IVT	137.01	-1.32	0.12	137.01	0.76	1
hCG16405.2	148925	probe	132	70	1/ IVT	1.57603e+06	62.53	1391.32	25204.8	0.04	0
hCG1640501.2	234116	probe	225	102	1/ IVT	4933.59	58.4	4.36	84.47	0.04	0
hCG1640505.3	215957	probe	188	102	1/ IVT	85160.6	81.29	75.18	1047.6	0.04	0
hCG1640511.3	203033	probe	202	34	1/ IVT	2428.14	11.29	2.14	215.02	0.1	0
hCG1640512.2	236233	probe	237	145	1/ IVT	1812.77	11.98	1.6	151.34	0.09	0
hCG1640514.2	188500	probe	77	52	1/ IVT	6585.51	17.62	5.37	373.78	0.07	0
hCG1640515.3	175604	probe	132	135	1/ IVT	197.29	-2.32	0.17	197.29	0.43	1
hCG1640519.3	107658	probe	83	47	1/ IVT	146.97	-1.42	0.12	146.97	0.71	1
hCG1640519.3	122466	probe	119	92	1/ IVT	173.96	0.31	0.14	173.96	3.21	1
hCG1640521.2	189732	probe	61	107	1/ IVT	3629.01	30.7	2.96	118.22	0.05	0
hCG1640529.2	201248	probe	77	147	1/ IVT	118.07	0.56	0.1	118.07	1.79	1
hCG1640530.3	104166	probe	222	8	1/ IVT	516	4.11	0.46	125.48	0.25	0
hCG1640531.4	188867	probe	226	35	1/ IVT	134.7	0.65	0.12	134.7	1.54	1
hCG1640532.2	211604	probe	24	128	1/ IVT	290941	111.86	237.31	2600.98	0.04	0
hCG1640533.2	162661	probe	79	112	1/ IVT	156.15	-0.22	0.13	156.15	4.58	1
hCG1640534.2	135546	probe	194	115	1/ IVT	3249.61	13.31	2.87	244.06	0.08	0
hCG1640535.2	170685	probe	54	102	1/ IVT	325.74	2.44	0.27	133.47	0.41	0
hCG1640542.2	118072	probe	6	39	1/ IVT	130.37	0.48	0.11	130.37	2.1	1
hCG1640549.4	231963	probe	69	59	1/ IVT	162.79	0.89	0.13	162.79	1.12	1
hCG1640553.2	205924	probe	44	35	1/ IVT	257.12	0.43	0.21	257.12	2.33	1
hCG1640554.3	122523	probe	6	121	1/ IVT	12179.3	49.58	9.93	245.66	0.04	0
hCG1640558.3	130634	probe	111	9	1/ IVT	17431.8	53.8	14.22	324.03	0.04	0
hCG1640559.3	117064	probe	216	72	1/ IVT	2293.85	10.03	2.03	228.75	0.11	0
hCG1640565.3	221844	probe	87	127	1/ IVT	279.59	0.1	0.23	279.59	9.85	1
hCG1640567.4	206344	probe	10	36	1/ IVT	7059.69	23.63	5.76	298.81	0.06	0
hCG1640571.3	236714	probe	34	118	1/ IVT	476370	97.1	388.55	4906.07	0.04	0
hCG1640575.3	122010	probe	69	58	1/ IVT	7153.64	57.24	5.83	124.97	0.04	0
hCG1640577.2	189195	probe	10	48	1/ IVT	177.43	2.62	0.14	67.67	0.38	0
hCG1640577.2	236974	probe	48	107	1/ IVT	28735.2	59.45	23.44	483.33	0.04	0
hCG1640577.2	134341	probe	124	121	1/ IVT	57.53	1.17	0.05	49.33	0.86	0
hCG1640578.4	168479	probe	52	113	1/ IVT	94290.4	76.65	76.91	1230.08	0.04	0
hCG1640580.3	232393	probe	226	146	1/ IVT	2690.94	9.82	2.38	273.96	0.11	0
hCG1640591.2	180971	probe	47	6	1/ IVT	8249.5	15.85	6.73	520.41	0.07	0
hCG1640593.3	146072	probe	205	108	1/ IVT	109.79	0.85	0.1	109.79	1.18	1
hCG1640599.3	229405	probe	99	146	1/ IVT	483.45	-1.27	0.39	483.45	0.79	1
hCG16406.2	105499	probe	15	123	1/ IVT	689.88	3.53	0.56	195.69	0.29	0
hCG1640601.3	702154	probe	31	13	1/ IVT	28474.1	46.93	23.22	606.75	0.04	0
hCG1640606.3	207047	probe	108	9	1/ IVT	2399.26	17.51	1.96	137.04	0.07	0
hCG1640609.1	136794	probe	82	2	1/ IVT	275.75	0.42	0.22	275.75	2.37	1
hCG1640609.1	145167	probe	208	134	1/ IVT	1600.28	4.09	1.41	390.96	0.25	0
hCG1640610.3	127636	probe	96	5	1/ IVT	177879	45.85	145.09	3879.88	0.04	0
hCG1640612.3	174736	probe	142	10	1/ IVT	12969.1	30.04	11.45	431.8	0.05	0
hCG1640613.2	197622	probe	105	111	1/ IVT	1820.13	10.28	1.48	177.05	0.1	0
hCG1640619.3	236094	probe	158	74	1/ IVT	46117.2	56.68	40.71	813.69	0.04	0
hCG1640620.3	217202	probe	14	111	1/ IVT	6059.04	52.28	4.94	115.89	0.04	0
hCG1640622.3	196451	probe	149	107	1/ IVT	1378.76	10.9	1.22	126.5	0.1	64
hCG1640624.3	110960	probe	195	33	1/ IVT	19325	73.39	17.06	263.32	0.04	0
hCG1640625.3	209734	probe	134	63	1/ IVT	390.04	2.72	0.34	143.46	0.37	0
hCG1640626.3	179010	probe	187	21	1/ IVT	6863.35	26.78	6.06	256.29	0.05	0
hCG1640627.4	192143	probe	98	150	1/ IVT	776.1	6.78	0.63	114.51	0.15	0
hCG1640628.3	151155	probe	6	72	1/ IVT	301.26	0.99	0.25	301.26	1.01	1
hCG1640630.2	149363	probe	171	82	1/ IVT	1765.74	13.3	1.56	132.78	0.08	0
hCG1640632.3	116913	probe	90	14	1/ IVT	1229.21	1.59	1	771.18	0.63	0
hCG1640634.3	200280	probe	226	130	1/ IVT	21337	47.69	18.84	447.42	0.04	0
hCG1640635.4	154434	probe	55	63	1/ IVT	6136.32	10.6	5.01	579.02	0.1	0
hCG1640636.2	233307	probe	56	19	1/ IVT	256	-1.63	0.21	256	0.62	1
hCG1640638.3	233301	probe	95	21	1/ IVT	449.12	2.15	0.37	208.53	0.47	0
hCG1640644.3	110136	probe	136	43	1/ IVT	844.46	-0.52	0.75	844.46	1.93	1
hCG1640645.2	190449	probe	75	66	1/ IVT	347.34	-0.09	0.28	347.34	11.44	1
hCG1640653.2	176377	probe	170	125	1/ IVT	139.76	0.55	0.12	139.76	1.81	1
hCG1640654.3	106160	probe	18	126	1/ IVT	134.54	0.28	0.11	134.54	3.56	1
hCG1640659.3	236892	probe	106	119	1/ IVT	1516.03	5.6	1.24	270.81	0.18	0
hCG1640663.3	232526	probe	164	114	1/ IVT	612.47	3.62	0.54	169.2	0.28	0
hCG1640668.4	225047	probe	186	126	1/ IVT	19015.8	36.48	16.79	521.23	0.05	0
hCG1640673.3	199931	probe	131	33	1/ IVT	168.11	-0.88	0.15	168.11	1.14	1
hCG1640677.2	154501	probe	183	115	1/ IVT	33923.4	64.88	29.95	522.9	0.04	0
hCG1640678.4	231283	probe	202	103	1/ IVT	868375	66.69	766.6	13020.2	0.04	0
hCG1640683.3	174706	probe	28	42	1/ IVT	152.55	1.17	0.12	130.28	0.85	0
hCG1640686.3	104615	probe	69	74	1/ IVT	325.2	3.18	0.27	102.29	0.32	0
hCG1640692.3	138834	probe	28	56	1/ IVT	752024	54.45	613.39	13812.5	0.04	0
hCG1640696.1	216287	probe	164	45	1/ IVT	6601.73	58.16	5.83	113.51	0.04	0
hCG1640698.3	108394	probe	227	81	1/ IVT	80.18	0.7	0.07	80.18	1.44	1
hCG1640699.5	216992	probe	69	64	1/ IVT	3495.46	3.86	2.85	906.41	0.26	0
hCG16407.3	170759	probe	143	45	1/ IVT	169.14	0.24	0.15	169.14	4.21	1
hCG1640700.3	157169	probe	73	118	1/ IVT	303.92	0.38	0.25	303.92	2.65	1
hCG1640702.3	213822	probe	17	76	1/ IVT	843.42	1.69	0.69	497.75	0.59	0
hCG1640707.3	196004	probe	157	83	1/ IVT	2238.46	2.65	1.98	844.63	0.38	0
hCG1640708.1	114390	probe	198	61	1/ IVT	23799.5	81.79	21.01	290.98	0.04	0
hCG1640714.3	233439	probe	73	94	1/ IVT	1625.17	11.3	1.33	143.82	0.1	0
hCG1640719.3	230555	probe	204	53	1/ IVT	99.56	-1.12	0.09	99.56	0.89	1
hCG1640725.2	162845	probe	195	83	1/ IVT	5831.01	23.89	5.15	244.1	0.06	0
hCG1640726.3	124552	probe	147	61	1/ IVT	5094.1	42.06	4.5	121.12	0.05	0
hCG1640727.2	159991	probe	205	25	1/ IVT	2977.94	36.47	2.63	81.65	0.05	0
hCG1640727.2	186013	probe	236	54	1/ IVT	4945.05	25.52	4.37	193.81	0.05	0
hCG1640728.2	184839	probe	63	50	1/ IVT	55924.3	68.15	45.61	820.62	0.04	0
hCG1640730.3	528807	probe	46	37	1/ IVT	501.98	1.58	0.41	316.72	0.63	0
hCG1640736.2	205276	probe	53	98	1/ IVT	623.11	2.92	0.51	213.74	0.34	0
hCG1640737.3	139192	probe	216	1	1/ IVT	246.16	-0.98	0.22	246.16	1.02	1
hCG1640741.3	230222	probe	117	87	1/ IVT	285.6	1	0.23	285.6	1	1
hCG1640748.1	108678	probe	174	45	1/ IVT	115333	98.27	101.82	1173.63	0.04	0
hCG1640750.3	116621	probe	171	64	1/ IVT	26712.4	72.82	23.58	366.82	0.04	0
hCG1640751.2	116829	probe	203	7	1/ IVT	93093.2	32.73	82.18	2844.58	0.05	0
hCG1640754.3	236413	probe	189	135	1/ IVT	1.19129e+06	82.26	1051.67	14481.4	0.04	0
hCG1640756.3	134269	probe	72	130	1/ IVT	18245.5	80.96	14.88	225.37	0.04	64
hCG1640757.3	199775	probe	112	146	1/ IVT	3232.99	18.28	2.64	176.84	0.07	0
hCG1640761.4	203190	probe	37	149	1/ IVT	60350.5	95.51	49.23	631.86	0.04	0
hCG1640762.3	123127	probe	2	19	1/ IVT	12063.9	69.2	9.84	174.32	0.04	0
hCG1640764.1	132736	probe	136	105	1/ IVT	42011.6	95.66	37.09	439.18	0.04	0
hCG1640765.2	183644	probe	27	106	1/ IVT	437032	95.18	356.47	4591.41	0.04	0
hCG1640770.3	142358	probe	138	109	1/ IVT	616.68	2.91	0.54	211.88	0.35	0
hCG1640777.2	190331	probe	171	96	1/ IVT	4024.89	14.59	3.55	275.77	0.08	0
hCG1640779.4	110900	probe	41	87	1/ IVT	103.95	0.4	0.08	103.95	2.52	1
hCG1640784.3	232351	probe	90	58	1/ IVT	175.91	0.28	0.14	175.91	3.58	1
hCG1640785.2	393133	probe	27	143	1/ IVT	224247	92	182.91	2437.54	0.04	0
hCG1640791.3	188699	probe	105	99	1/ IVT	238.48	-1.18	0.19	238.48	0.85	1
hCG1640792.3	228049	probe	35	46	1/ IVT	169.34	-1.14	0.14	169.34	0.88	1
hCG1640793.4	107344	probe	132	17	1/ IVT	107950	37.71	95.3	2862.88	0.05	0
hCG1640794.3	162490	probe	174	101	1/ IVT	723174	96.35	638.42	7505.52	0.04	0
hCG1640796.3	135904	probe	116	78	1/ IVT	32208.7	76.1	26.27	423.26	0.04	0
hCG16408.4	179130	probe	79	29	1/ IVT	15334.4	49.27	12.51	311.22	0.04	0
hCG1640800.4	229724	probe	127	28	1/ IVT	52857.6	79.34	46.66	666.2	0.04	0
hCG1640802.3	102627	probe	1	65	1/ IVT	9365.11	51.62	7.64	181.42	0.04	0
hCG1640805.3	193078	probe	28	27	1/ IVT	42366.2	91.43	34.56	463.38	0.04	0
hCG1640809.3	215343	probe	61	103	1/ IVT	37325.8	85.68	30.44	435.66	0.04	0
hCG1640814.4	226128	probe	97	23	1/ IVT	90.99	0.31	0.07	90.99	3.2	1
hCG1640814.4	122477	probe	103	82	1/ IVT	120.68	-1.28	0.1	120.68	0.78	1
hCG1640820.2	119063	probe	22	25	1/ IVT	99900.2	62.77	81.48	1591.57	0.04	0
hCG1640822.3	110205	probe	88	6	1/ IVT	243330	46.53	198.47	5229.09	0.04	0
hCG1640822.3	122241	probe	98	57	1/ IVT	194344	74.11	158.52	2622.32	0.04	0
hCG1640823.2	166471	probe	62	153	1/ IVT	4223.13	13.5	3.44	312.89	0.08	0
hCG1640825.3	108454	probe	118	74	1/ IVT	5468.79	20.45	4.46	267.47	0.06	0
hCG1640827.4	214045	probe	144	32	1/ IVT	5641.72	17.32	4.98	325.7	0.07	0
hCG1640831.2	203258	probe	57	79	1/ IVT	1154.36	4.84	0.94	238.54	0.21	0
hCG1640833.3	102564	probe	201	38	1/ IVT	12599.7	40.62	11.12	310.17	0.05	0
hCG1640834.3	645710	probe	85	65	1/ IVT	687065	48.3	560.41	14225.4	0.04	0
hCG1640837.4	202399	probe	5	61	1/ IVT	181454	70.85	148	2561.2	0.04	0
hCG1640838.3	155355	probe	132	16	1/ IVT	390.32	-1.23	0.34	390.32	0.81	1
hCG1640838.3	136923	probe	236	132	1/ IVT	359.2	-1.18	0.32	359.2	0.85	1
hCG1640839.4	229386	probe	206	128	1/ IVT	255953	44.46	225.96	5756.37	0.04	0
hCG1640844.3	108623	probe	182	4	1/ IVT	233.92	-1.62	0.21	233.92	0.62	1
hCG1640847.3	113912	probe	6	52	1/ IVT	240.52	1.88	0.2	128.02	0.53	0
hCG1640850.3	236117	probe	74	62	1/ IVT	151029	83.93	123.19	1799.48	0.04	0
hCG1640852.3	126445	probe	24	154	1/ IVT	68.64	-0.41	0.06	68.64	2.46	1
hCG1640854.3	234362	probe	3	145	1/ IVT	153.25	-0.71	0.13	153.25	1.41	1
hCG1640855.2	208312	probe	176	138	1/ IVT	357250	110.18	315.38	3242.43	0.04	64
hCG1640859.3	708660	probe	89	21	1/ IVT	978.72	2.22	0.8	441.28	0.45	0
hCG1640867.2	183721	probe	51	115	1/ IVT	12420.6	30.67	10.13	404.95	0.05	0
hCG1640867.2	129664	probe	188	135	1/ IVT	1762.52	1.5	1.56	1177.32	0.67	0
hCG1640869.3	536277	probe	75	113	1/ IVT	279.27	0.69	0.23	279.27	1.46	1
hCG1640871.4	151440	probe	46	137	1/ IVT	34625.4	45.61	28.24	759.15	0.04	0
hCG1640873.2	115606	probe	95	124	1/ IVT	998435	74.72	814.38	13362.7	0.04	0
hCG1640874.3	207786	probe	3	126	1/ IVT	199.32	0.77	0.16	199.32	1.29	1
hCG1640875.2	100687	probe	223	134	1/ IVT	191.37	1.55	0.17	123.59	0.65	0
hCG1640876.3	194752	probe	229	73	1/ IVT	282.42	-2.03	0.25	282.42	0.49	1
hCG1640877.3	152955	probe	157	148	1/ IVT	409.43	1.8	0.36	228.07	0.56	0
hCG1640878.3	184443	probe	142	136	1/ IVT	57792.8	65.97	51.02	876.07	0.04	0
hCG1640879.4	212295	probe	227	158	1/ IVT	2073.37	16.89	1.83	122.75	0.07	0
hCG1640885.4	177204	probe	153	116	1/ IVT	17066.1	73.87	15.07	231.03	0.04	0
hCG1640891.3	139103	probe	132	118	1/ IVT	1535.64	12.41	1.36	123.73	0.09	0
hCG1640892.3	139791	probe	5	75	1/ IVT	4797.22	11.85	3.91	404.67	0.09	0
hCG1640895.3	165901	probe	141	15	1/ IVT	25508.8	38	22.52	671.37	0.05	0
hCG16409.3	135851	probe	222	105	1/ IVT	477.85	-0.3	0.42	477.85	3.31	1
hCG1640903.4	181162	probe	159	15	1/ IVT	18825.9	8.24	16.62	2285.59	0.13	0
hCG1640912.3	193239	probe	87	102	1/ IVT	286646	82.76	233.8	3463.6	0.04	0
hCG1640914.2	145919	probe	156	8	1/ IVT	277.32	2.14	0.24	129.34	0.47	0
hCG1640915.4	160495	probe	1	72	1/ IVT	85364.8	41.22	69.63	2071.15	0.04	0
hCG1640921.3	162191	probe	134	116	1/ IVT	178.58	-0.77	0.16	178.58	1.3	1
hCG1640923.2	216937	probe	112	17	1/ IVT	1051.98	7.81	0.86	134.7	0.13	64
hCG1640924.2	190926	probe	55	46	1/ IVT	131.33	0.32	0.11	131.33	3.09	1
hCG1640925.5	160897	probe	59	146	1/ IVT	21761.9	63.47	17.75	342.89	0.04	0
hCG1640926.3	114122	probe	43	45	1/ IVT	76538.7	98.73	62.43	775.26	0.04	0
hCG1640926.3	119484	probe	174	127	1/ IVT	83681.3	93.78	73.87	892.28	0.04	0
hCG1640928.3	155654	probe	193	133	1/ IVT	499.75	1.83	0.44	273.41	0.55	0
hCG1640930.3	211072	probe	39	35	1/ IVT	399.04	0.7	0.33	399.04	1.43	1
hCG1640931.2	189433	probe	192	149	1/ IVT	4107.95	2.38	3.63	1728.02	0.42	0
hCG1640935.3	228354	probe	34	150	1/ IVT	3957.58	29.25	3.23	135.32	0.05	0
hCG1640936.3	104454	probe	144	139	1/ IVT	1029.44	0.5	0.91	1029.44	1.99	1
hCG1640945.3	200962	probe	182	73	1/ IVT	852.43	10	0.75	85.22	0.11	0
hCG1640948.2	122674	probe	65	30	1/ IVT	581.28	16.85	0.47	34.49	0.07	0
hCG1640949.2	125714	probe	224	76	1/ IVT	232.79	1.06	0.21	220.38	0.95	0
hCG1640952.4	101065	probe	106	87	1/ IVT	69559.2	83.78	56.74	830.24	0.04	0
hCG1640953.2	228134	probe	227	7	1/ IVT	114484	77.61	101.07	1475.05	0.04	0
hCG1640954.3	197090	probe	51	125	1/ IVT	2381.19	8.51	1.94	279.94	0.12	0
hCG1640960.5	134064	probe	25	55	1/ IVT	4351.5	25.2	3.55	172.7	0.05	0
hCG1640964.2	114854	probe	235	54	1/ IVT	3575.94	24.15	3.16	148.1	0.06	0
hCG1640966.2	164822	probe	172	46	1/ IVT	47831.6	58.61	42.23	816.13	0.04	0
hCG1640970.3	137654	probe	81	149	1/ IVT	31706.2	45.44	25.86	697.77	0.04	0
hCG1640970.3	207499	probe	224	103	1/ IVT	34528.8	89.81	30.48	384.45	0.04	0
hCG1640974.3	228045	probe	8	38	1/ IVT	349888	91.84	285.39	3809.91	0.04	64
hCG1640978.4	210362	probe	66	113	1/ IVT	1.46139e+06	96.26	1191.99	15181.8	0.04	4
hCG1640980.4	194637	probe	132	19	1/ IVT	59083.1	28.52	52.16	2071.43	0.05	0
hCG1640981.4	222445	probe	179	108	1/ IVT	3527.42	10.22	3.11	345.01	0.11	0
hCG1640982.2	229225	probe	161	7	1/ IVT	131.38	0.02	0.12	131.38	51.22	1
hCG1640983.2	160263	probe	107	107	1/ IVT	36968.4	41.26	30.15	896.06	0.04	0
hCG1640984.1	119320	probe	42	62	1/ IVT	3178.09	14.28	2.59	222.51	0.08	0
hCG1640985.1	223459	probe	79	74	1/ IVT	13689.6	53.44	11.17	256.16	0.04	0
hCG1640986.3	195742	probe	49	46	1/ IVT	418.77	-0.58	0.34	418.77	1.73	1
hCG1640999.4	140559	probe	172	35	1/ IVT	40.39	-4.26	0.04	40.39	0.24	131073
hCG16410.2	129999	probe	14	45	1/ IVT	13065.2	26.43	10.66	494.25	0.05	0
hCG1641001.4	108672	probe	218	8	1/ IVT	129.92	-0.14	0.11	129.92	6.99	1
hCG1641003.3	190354	probe	108	4	1/ IVT	2146.01	1.04	1.75	2055.08	0.96	0
hCG1641004.3	236955	probe	45	138	1/ IVT	238359	85.35	194.42	2792.77	0.04	0
hCG1641005.2	103458	probe	172	133	1/ IVT	392.35	0.21	0.35	392.35	4.66	1
hCG1641006.3	112057	probe	165	48	1/ IVT	11390.3	65.46	10.06	173.99	0.04	0
hCG1641006.3	222653	probe	234	51	1/ IVT	85751.6	70.5	75.7	1216.38	0.04	0
hCG1641013.3	134700	probe	49	38	1/ IVT	452.21	3.31	0.37	136.63	0.3	0
hCG1641014.4	109793	probe	206	93	1/ IVT	468.9	3.5	0.41	133.89	0.29	0
hCG1641016.3	713820	probe	188	12	1/ IVT	438.31	1.41	0.39	311.75	0.71	0
hCG1641016.3	223065	probe	216	150	1/ IVT	261.85	-0.54	0.23	261.85	1.85	1
hCG1641019.3	204036	probe	158	154	1/ IVT	14937.5	62.44	13.19	239.25	0.04	0
hCG1641021.3	229250	probe	25	146	1/ IVT	264.11	1.81	0.22	146.02	0.55	0
hCG1641023.2	149846	probe	26	66	1/ IVT	613328	113.65	500.26	5396.87	0.04	64
hCG1641024.2	119727	probe	173	1	1/ IVT	2278.66	31.95	2.01	71.32	0.05	0
hCG1641026.3	224505	probe	8	54	1/ IVT	1368.57	7.79	1.12	175.72	0.13	0
hCG1641026.3	181667	probe	16	105	1/ IVT	369.2	1.28	0.3	287.7	0.78	0
hCG1641027.3	125219	probe	97	52	1/ IVT	1270.62	6.24	1.04	203.6	0.16	0
hCG1641028.3	130519	probe	90	142	1/ IVT	1161.78	4.13	0.95	281.43	0.24	0
hCG1641029.5	218092	probe	24	101	1/ IVT	318.38	2	0.26	158.99	0.5	0
hCG1641029.5	151750	probe	213	44	1/ IVT	7205.39	36.07	6.36	199.76	0.05	0
hCG1641032.4	132043	probe	104	63	1/ IVT	8565.04	39.49	6.99	216.87	0.04	0
hCG1641034.2	103793	probe	89	19	1/ IVT	21264.6	26.53	17.34	801.4	0.05	0
hCG1641041.3	108964	probe	179	114	1/ IVT	11176	22.07	9.87	506.41	0.06	0
hCG1641044.3	231499	probe	236	98	1/ IVT	292.05	1.15	0.26	253.01	0.87	0
hCG1641045.3	180672	probe	176	9	1/ IVT	1084.58	5.8	0.96	186.91	0.18	0
hCG1641046.2	166990	probe	5	62	1/ IVT	433131	83.83	353.29	5166.77	0.04	0
hCG1641050.5	213947	probe	79	25	1/ IVT	32060.8	88.95	26.15	360.43	0.04	0
hCG1641051.2	185703	probe	106	86	1/ IVT	759.23	4.83	0.62	157.11	0.21	0
hCG1641052.3	146467	probe	191	19	1/ IVT	258.67	1.69	0.23	152.86	0.59	0
hCG1641059.3	178980	probe	35	24	1/ IVT	4189.66	12.25	3.42	342.12	0.09	0
hCG1641060.2	130690	probe	203	24	1/ IVT	6245.82	39.76	5.51	157.08	0.05	0
hCG1641061.3	134277	probe	187	30	1/ IVT	522.58	5.53	0.46	94.44	0.18	0
hCG1641062.3	121291	probe	109	125	1/ IVT	5764.87	8.18	4.7	704.74	0.13	0
hCG1641065.4	232195	probe	217	74	1/ IVT	9412.22	51.73	8.31	181.95	0.04	0
hCG1641068.3	232512	probe	27	46	1/ IVT	118.42	-0.18	0.1	118.42	5.68	1
hCG1641069.2	185973	probe	232	63	1/ IVT	3340.73	32.54	2.95	102.66	0.05	0
hCG1641073.1	113776	probe	125	125	1/ IVT	127570	71.54	112.62	1783.14	0.04	0
hCG1641077.4	230054	probe	64	38	1/ IVT	1930.91	18.75	1.57	102.97	0.06	0
hCG1641086.2	202242	probe	7	58	1/ IVT	961.9	5.11	0.78	188.33	0.2	0
hCG1641087.2	175663	probe	7	39	1/ IVT	282.01	1.42	0.23	198.9	0.71	0
hCG1641096.3	197227	probe	185	49	1/ IVT	176.51	0.13	0.16	176.51	7.62	1
hCG1641104.3	127872	probe	115	43	1/ IVT	643.66	5.64	0.53	114.04	0.18	0
hCG1641106.4	179425	probe	109	4	1/ IVT	144760	60.82	118.07	2380.14	0.04	0
hCG1641108.2	180331	probe	53	44	1/ IVT	216.73	0.53	0.18	216.73	1.87	1
hCG1641109.3	102421	probe	5	39	1/ IVT	350.95	2.12	0.29	165.3	0.47	0
hCG1641110.3	136211	probe	174	136	1/ IVT	171.43	0.37	0.15	171.43	2.69	1
hCG1641111.2	173654	probe	146	145	1/ IVT	567.38	5.69	0.5	99.66	0.18	0
hCG1641112.4	102063	probe	152	11	1/ IVT	18434	51.06	16.27	361.01	0.04	0
hCG1641117.3	115556	probe	151	127	1/ IVT	181.27	0.58	0.16	181.27	1.71	1
hCG1641117.3	394176	probe	186	102	1/ IVT	7302.33	29.44	6.45	248.05	0.05	0
hCG1641126.2	121028	probe	197	12	1/ IVT	330.1	1.58	0.29	209.29	0.64	0
hCG1641127.2	155784	probe	121	138	1/ IVT	82702.5	48.9	73.01	1691.18	0.04	0
hCG1641133.3	164845	probe	16	118	1/ IVT	1569.99	13.31	1.28	117.95	0.08	0
hCG1641133.3	122520	probe	158	66	1/ IVT	380.36	2.16	0.34	175.73	0.46	0
hCG1641134.2	233220	probe	9	98	1/ IVT	2164.93	8.73	1.77	248.08	0.12	0
hCG1641137.3	675241	probe	129	14	1/ IVT	282.48	0.6	0.25	282.48	1.66	1
hCG1641137.3	481675	probe	189	70	1/ IVT	304.92	4.23	0.27	72.01	0.24	0
hCG1641138.2	219839	probe	50	96	1/ IVT	403.9	1	0.33	403.9	1	1
hCG1641138.2	216611	probe	50	134	1/ IVT	12068.1	45.27	9.84	266.57	0.04	0
hCG1641141.2	144972	probe	215	62	1/ IVT	1190.59	7.27	1.05	163.72	0.14	0
hCG1641145.3	173256	probe	61	154	1/ IVT	31993	80.13	26.1	399.25	0.04	0
hCG1641146.4	141183	probe	121	146	1/ IVT	171822	56.86	151.68	3021.91	0.04	0
hCG1641147.3	143393	probe	53	47	1/ IVT	354.64	1	0.29	354.64	1.01	1
hCG1641147.3	226550	probe	211	4	1/ IVT	850.09	6.44	0.75	132.01	0.16	0
hCG1641148.2	173964	probe	9	78	1/ IVT	19670.5	75.71	16.04	259.8	0.04	0
hCG1641148.2	127696	probe	113	45	1/ IVT	3345.17	15.33	2.73	218.16	0.07	0
hCG1641157.3	233815	probe	95	16	1/ IVT	431.6	0.68	0.35	431.6	1.46	1
hCG1641167.3	179512	probe	157	58	1/ IVT	167.34	0.11	0.15	167.34	9.38	1
hCG1641171.3	236496	probe	130	93	1/ IVT	27601.4	18.74	24.37	1472.68	0.07	0
hCG1641173.2	190775	probe	163	119	1/ IVT	189.86	-0.95	0.17	189.86	1.05	1
hCG1641180.3	184452	probe	137	43	1/ IVT	1.85669e+06	62.2	1639.09	29849.5	0.04	4
hCG1641184.4	212210	probe	205	89	1/ IVT	675.13	1.84	0.6	367.13	0.55	0
hCG1641188.3	205129	probe	151	104	1/ IVT	5651.38	36.44	4.99	155.1	0.05	0
hCG1641189.3	196593	probe	85	144	1/ IVT	11727.7	45.97	9.57	255.14	0.04	0
hCG1641198.2	132576	probe	111	114	1/ IVT	288.59	1.22	0.24	236.39	0.82	0
hCG1641199.2	107613	probe	54	95	1/ IVT	215.92	-0.84	0.18	215.92	1.19	1
hCG16412.3	216719	probe	222	158	1/ IVT	158.55	0.92	0.14	158.55	1.09	1
hCG1641200.4	166377	probe	205	93	1/ IVT	30854	59.7	27.24	516.78	0.04	0
hCG1641204.4	143298	probe	37	92	1/ IVT	42267.3	58.88	34.48	717.86	0.04	0
hCG1641209.2	178677	probe	175	148	1/ IVT	88431.8	75.89	78.07	1165.22	0.04	0
hCG1641210.3	115502	probe	222	115	1/ IVT	110919	93.28	97.92	1189.13	0.04	0
hCG1641215.3	184645	probe	127	78	1/ IVT	196.99	-0.75	0.17	196.99	1.34	1
hCG1641222.3	126493	probe	73	106	1/ IVT	1605.06	0.5	1.31	1605.06	2	1
hCG1641222.3	209109	probe	223	128	1/ IVT	239.59	-0.5	0.21	239.59	1.98	1
hCG1641224.3	233446	probe	98	70	1/ IVT	302.15	-0.71	0.25	302.15	1.41	1
hCG1641225.3	106309	probe	149	71	1/ IVT	613.8	0.94	0.54	613.8	1.07	1
hCG1641227.3	125187	probe	84	5	1/ IVT	90.73	-0.89	0.07	90.73	1.12	1
hCG1641229.2	192176	probe	230	127	1/ IVT	230868	49.75	203.81	4640.27	0.04	0
hCG1641230.3	118662	probe	214	14	1/ IVT	35964.1	73.15	31.75	491.67	0.04	0
hCG1641231.3	162764	probe	167	18	1/ IVT	1475.08	12.84	1.3	114.84	0.09	0
hCG1641236.3	162353	probe	225	82	1/ IVT	26784	100.73	23.64	265.89	0.04	0
hCG1641237.3	210534	probe	83	114	1/ IVT	45399.7	81.13	37.03	559.56	0.04	0
hCG1641238.3	102450	probe	189	97	1/ IVT	115.51	0.53	0.1	115.51	1.88	1
hCG1641241.3	216424	probe	172	22	1/ IVT	61026.7	63.94	53.87	954.44	0.04	0
hCG1641243.2	161819	probe	151	142	1/ IVT	45977.9	76.85	40.59	598.29	0.04	0
hCG1641244.2	111405	probe	123	22	1/ IVT	811097	68.73	716.04	11801.5	0.04	0
hCG1641245.2	144565	probe	157	119	1/ IVT	2350.65	9.02	2.08	260.58	0.12	0
hCG1641252.2	112738	probe	58	65	1/ IVT	88971.7	69.94	72.57	1272.06	0.04	0
hCG1641254.3	186169	probe	184	57	1/ IVT	40812	46.12	36.03	884.94	0.04	0
hCG1641267.5	186684	probe	7	57	1/ IVT	954.49	12.51	0.78	76.32	0.09	0
hCG1641270.4	141703	probe	178	89	1/ IVT	339029	93.01	299.29	3644.93	0.04	0
hCG1641276.4	159741	probe	151	153	1/ IVT	294.22	-2	0.26	294.22	0.5	1
hCG1641280.3	102730	probe	34	53	1/ IVT	143.46	0.28	0.12	143.46	3.6	1
hCG1641281.4	164267	probe	110	105	1/ IVT	11314.9	36.42	9.23	310.67	0.04	0
hCG1641285.2	125513	probe	129	114	1/ IVT	100.09	-2.51	0.09	100.09	0.4	1
hCG1641297.2	202138	probe	39	108	1/ IVT	231559	93.94	188.87	2465.02	0.04	0
hCG16413.2	145499	probe	199	94	1/ IVT	838.35	4.92	0.74	170.55	0.21	0
hCG1641301.3	145258	probe	136	35	1/ IVT	11051.2	54.24	9.76	203.75	0.04	0
hCG1641304.2	135075	probe	177	56	1/ IVT	312.68	4.11	0.28	76	0.25	0
hCG1641312.3	157804	probe	31	2	1/ IVT	8033.58	20.92	6.55	384.06	0.06	0
hCG1641325.2	213429	probe	167	136	1/ IVT	673736	115.21	594.77	5847.81	0.04	0
hCG1641328.2	100830	probe	103	13	1/ IVT	240.22	-0.09	0.2	240.22	10.77	1
hCG1641337.1	160411	probe	147	16	1/ IVT	194.3	0.29	0.17	194.3	3.48	1
hCG1641338.3	213788	probe	216	105	1/ IVT	455.88	-0.55	0.4	455.88	1.81	1
hCG1641339.3	101931	probe	79	118	1/ IVT	65018.5	100.64	53.03	646.07	0.04	0
hCG1641340.3	111029	probe	224	43	1/ IVT	1931.77	10.74	1.71	179.92	0.1	0
hCG1641345.1	178221	probe	135	144	1/ IVT	256.49	1.2	0.23	213.31	0.83	0
hCG1641355.4	236177	probe	56	63	1/ IVT	831477	99.26	678.2	8376.97	0.04	0
hCG1641357.3	163619	probe	126	27	1/ IVT	280.28	0.25	0.25	280.28	3.93	1
hCG1641358.3	203170	probe	236	34	1/ IVT	20221.8	54.31	17.85	372.32	0.04	0
hCG1641359.3	184519	probe	62	118	1/ IVT	2878.3	19	2.35	151.51	0.06	0
hCG1641362.3	236317	probe	67	153	1/ IVT	14664.7	27.64	11.96	530.65	0.05	0
hCG1641364.3	149391	probe	89	38	1/ IVT	181.89	0.21	0.15	181.89	4.76	1
hCG1641368.3	177367	probe	84	137	1/ IVT	310.1	2.03	0.25	152.62	0.49	0
hCG1641375.2	119386	probe	101	4	1/ IVT	16404.8	62.49	13.38	262.53	0.04	0
hCG1641378.3	190050	probe	2	66	1/ IVT	18779.5	60.69	15.32	309.42	0.04	0
hCG1641384.3	152509	probe	25	13	1/ IVT	965.5	5.52	0.79	174.76	0.18	0
hCG1641386.3	120415	probe	75	91	1/ IVT	11637.7	19.98	9.49	582.47	0.06	0
hCG1641393.3	228958	probe	92	6	1/ IVT	1827.34	3.33	1.49	548.34	0.3	0
hCG1641398.4	236445	probe	97	93	1/ IVT	16936.2	48.32	13.81	350.49	0.04	0
hCG1641407.3	222524	probe	179	112	1/ IVT	950114	86.88	838.76	10936.4	0.04	0
hCG1641409.2	123731	probe	92	51	1/ IVT	3309.46	6.02	2.7	549.64	0.17	0
hCG1641410.2	196135	probe	78	78	1/ IVT	838.12	1.78	0.68	469.87	0.56	0
hCG1641411.3	131407	probe	13	102	1/ IVT	2597.02	24.25	2.12	107.09	0.05	0
hCG1641416.1	185528	probe	139	111	1/ IVT	340.39	2.46	0.3	138.45	0.41	0
hCG1641423.3	211169	probe	65	17	1/ IVT	511756	49.39	417.42	10360.6	0.04	0
hCG1641424.3	209101	probe	74	35	1/ IVT	167394	29.07	136.54	5758.69	0.05	0
hCG1641424.3	218527	probe	124	134	1/ IVT	2971.43	22.73	2.62	130.73	0.06	0
hCG1641424.3	167138	probe	187	12	1/ IVT	23019.9	37.43	20.32	614.96	0.05	0
hCG1641425.4	229003	probe	84	2	1/ IVT	2506.04	14.96	2.04	167.51	0.08	0
hCG1641431.3	216952	probe	9	133	1/ IVT	462962	64.39	377.62	7189.52	0.04	0
hCG1641432.3	161183	probe	86	24	1/ IVT	4734.61	22.4	3.86	211.4	0.06	0
hCG1641433.3	222062	probe	192	50	1/ IVT	348150	102.71	307.35	3389.8	0.04	0
hCG1641433.3	212650	probe	212	111	1/ IVT	63788	85.52	56.31	745.89	0.04	0
hCG1641434.4	236585	probe	43	105	1/ IVT	203515	52	166	3913.48	0.04	0
hCG1641437.1	186921	probe	52	109	1/ IVT	6045.99	38.05	4.93	158.89	0.04	0
hCG1641438.1	211133	probe	230	37	1/ IVT	525.93	13.43	0.46	39.16	0.08	0
hCG1641439.3	229515	probe	132	74	1/ IVT	586.79	5.33	0.52	110	0.19	0
hCG1641444.2	142008	probe	82	110	1/ IVT	65848.8	59.71	53.71	1102.84	0.04	0
hCG1641447.2	149730	probe	223	69	1/ IVT	2570.81	15.94	2.27	161.3	0.07	0
hCG1641450.3	161914	probe	198	56	1/ IVT	9447.8	63.49	8.34	148.81	0.04	0
hCG1641456.3	138193	probe	38	109	1/ IVT	813	1.81	0.66	448.99	0.55	0
hCG1641457.3	138287	probe	38	151	1/ IVT	20382	69.5	16.62	293.25	0.04	0
hCG1641458.3	224381	probe	85	118	1/ IVT	396.16	2.23	0.32	177.93	0.45	0
hCG1641460.2	173367	probe	102	57	1/ IVT	10165.5	18.73	8.29	542.87	0.06	0
hCG1641463.2	100635	probe	169	30	1/ IVT	5314.91	13.74	4.69	386.96	0.08	0
hCG1641464.2	170987	probe	227	16	1/ IVT	327.91	-0.6	0.29	327.91	1.66	1
hCG1641466.4	233268	probe	107	128	1/ IVT	11933.5	9.49	9.73	1257.49	0.11	0
hCG1641470.4	175820	probe	135	135	1/ IVT	9900.14	50.24	8.74	197.07	0.04	0
hCG1641470.4	154326	probe	231	122	1/ IVT	22450	63.21	19.82	355.16	0.04	0
hCG1641471.2	230029	probe	238	69	1/ IVT	3076.5	16.32	2.72	188.46	0.07	0
hCG1641475.1	176417	probe	102	112	1/ IVT	206.23	1.26	0.17	163.61	0.79	0
hCG1641477.4	236186	probe	87	152	1/ IVT	276.09	0.22	0.23	276.09	4.51	1
hCG1641481.2	212372	probe	24	82	1/ IVT	302.53	1.48	0.25	204.18	0.68	0
hCG1641486.3	206762	probe	105	147	1/ IVT	277.54	-0.24	0.23	277.54	4.2	1
hCG1641487.4	147050	probe	215	51	1/ IVT	234.15	0.96	0.21	234.15	1.04	1
hCG1641490.2	149565	probe	117	14	1/ IVT	5845.56	-0.31	4.77	5845.56	3.22	1
hCG1641491.4	104827	probe	50	97	1/ IVT	198.53	-0.11	0.16	198.53	9.07	1
hCG1641496.4	144452	probe	44	25	1/ IVT	430.36	10.98	0.35	39.2	0.1	0
hCG1641497.3	161727	probe	164	36	1/ IVT	2796.4	11.26	2.47	248.37	0.1	0
hCG1641498.3	198317	probe	78	131	1/ IVT	169.36	-1.4	0.14	169.36	0.72	1
hCG16415.3	193005	probe	117	88	1/ IVT	137.75	-0.91	0.11	137.75	1.1	1
hCG1641501.2	191578	probe	138	4	1/ IVT	421727	45.83	372.3	9202.16	0.04	0
hCG1641505.2	124046	probe	74	89	1/ IVT	32870.8	38.95	26.81	843.87	0.04	0
hCG1641507.1	218928	probe	236	135	1/ IVT	1810.04	0.92	1.6	1810.04	1.09	1
hCG1641508.3	206170	probe	134	81	1/ IVT	6858.11	11.09	6.05	618.6	0.1	0
hCG1641509.3	106323	probe	99	154	1/ IVT	268	-0.87	0.22	268	1.15	1
hCG1641510.4	158076	probe	81	129	1/ IVT	467.27	0.24	0.38	467.27	4.23	1
hCG1641511.4	118724	probe	43	50	1/ IVT	36462.1	62.98	29.74	578.95	0.04	0
hCG1641512.3	236641	probe	27	25	1/ IVT	112.56	0.97	0.09	112.56	1.04	1
hCG1641516.2	605037	probe	88	7	1/ IVT	385.31	1.43	0.31	269.9	0.7	0
hCG1641518.3	194927	probe	62	35	1/ IVT	397116	90.46	323.91	4390.14	0.04	0
hCG1641519.2	111216	probe	47	88	1/ IVT	1.17563e+06	78.09	958.9	15055	0.04	0
hCG1641521.3	235812	probe	88	110	1/ IVT	6120.95	33.38	4.99	183.38	0.05	0
hCG1641521.3	109189	probe	237	64	1/ IVT	562.43	5.71	0.5	98.5	0.18	0
hCG1641525.3	189281	probe	103	17	1/ IVT	818.5	0.41	0.67	818.5	2.44	1
hCG1641527.3	143427	probe	132	143	1/ IVT	277.93	-1.15	0.25	277.93	0.87	1
hCG1641532.3	213722	probe	61	129	1/ IVT	3794.85	27.31	3.1	138.96	0.05	0
hCG1641533.2	198623	probe	67	47	1/ IVT	344.2	-1.49	0.28	344.2	0.67	1
hCG1641538.4	157350	probe	169	54	1/ IVT	515.62	1.95	0.46	264.54	0.51	0
hCG1641539.2	157195	probe	225	112	1/ IVT	116.46	0.68	0.1	116.46	1.47	1
hCG1641541.2	182266	probe	145	139	1/ IVT	196.42	-1.39	0.17	196.42	0.72	1
hCG1641544.3	234913	probe	94	109	1/ IVT	1223.64	-0.15	1	1223.64	6.79	1
hCG1641546.3	545168	probe	26	96	1/ IVT	70.31	1.67	0.06	42	0.6	0
hCG1641546.3	121551	probe	89	110	1/ IVT	1881.44	9.33	1.53	201.6	0.11	0
hCG1641546.3	178904	probe	168	92	1/ IVT	473.32	4.52	0.42	104.81	0.22	0
hCG1641550.3	142494	probe	38	66	1/ IVT	361189	108.64	294.61	3324.7	0.04	64
hCG1641555.2	158699	probe	16	76	1/ IVT	291.35	2.89	0.24	100.83	0.35	0
hCG1641556.3	236371	probe	86	42	1/ IVT	720167	50.52	587.41	14254.7	0.04	0
hCG1641561.3	105503	probe	56	65	1/ IVT	5183.96	34.57	4.23	149.96	0.05	0
hCG1641564.2	162119	probe	31	142	1/ IVT	2978.48	15.88	2.43	187.57	0.07	0
hCG1641566.2	112524	probe	38	33	1/ IVT	376406	77.6	307.02	4850.64	0.04	0
hCG1641569.2	207278	probe	123	99	1/ IVT	9267.61	23.59	8.18	392.86	0.06	0
hCG1641571.3	144226	probe	71	82	1/ IVT	6936.32	16.09	5.66	431.06	0.07	0
hCG1641571.3	199779	probe	134	47	1/ IVT	12427.5	35.05	10.97	354.57	0.05	0
hCG1641572.3	207068	probe	95	74	1/ IVT	91353.1	76.39	74.51	1195.89	0.04	0
hCG1641574.2	178077	probe	50	22	1/ IVT	163.57	-0.89	0.13	163.57	1.12	1
hCG1641577.3	110709	probe	169	34	1/ IVT	18165.2	54.2	16.04	335.18	0.04	0
hCG1641578.3	228889	probe	206	57	1/ IVT	21678	40.08	19.14	540.91	0.05	0
hCG1641579.2	236837	probe	49	142	1/ IVT	38385.5	73.18	31.31	524.53	0.04	0
hCG1641586.2	172316	probe	157	55	1/ IVT	182.61	0.91	0.16	182.61	1.1	1
hCG1641587.2	533601	probe	55	75	1/ IVT	416.98	2.29	0.34	181.93	0.44	0
hCG1641589.3	176580	probe	110	24	1/ IVT	22918	51.94	18.69	441.2	0.04	0
hCG1641595.3	155691	probe	106	31	1/ IVT	5236.79	38.53	4.27	135.91	0.04	0
hCG1641601.4	133356	probe	199	52	1/ IVT	274467	111.25	242.3	2467.02	0.04	0
hCG1641602.3	214300	probe	122	132	1/ IVT	392.18	5.18	0.35	75.73	0.2	0
hCG1641604.4	159731	probe	223	9	1/ IVT	217931	110.25	192.39	1976.68	0.04	0
hCG1641605.3	160246	probe	55	125	1/ IVT	4733.3	4.43	3.86	1068.76	0.23	0
hCG1641609.2	182098	probe	61	133	1/ IVT	206.6	1.29	0.17	160.3	0.78	0
hCG1641611.1	214479	probe	173	132	1/ IVT	1.12929e+06	119.86	996.94	9422.13	0.04	0
hCG1641614.4	236351	probe	138	57	1/ IVT	346428	84.31	305.83	4108.74	0.04	0
hCG1641615.3	138143	probe	15	99	1/ IVT	1077.07	-0.45	0.88	1077.07	2.24	1
hCG1641616.2	111981	probe	114	58	1/ IVT	598.95	3.81	0.49	157.03	0.26	0
hCG1641617.1	714590	probe	171	66	1/ IVT	39395.2	115.44	34.78	341.26	0.04	64
hCG1641618.4	228835	probe	67	30	1/ IVT	119.47	-2.07	0.1	119.47	0.48	1
hCG1641620.3	111370	probe	174	59	1/ IVT	1241.76	9.16	1.1	135.49	0.12	0
hCG1641623.3	183871	probe	35	95	1/ IVT	7919.62	40.43	6.46	195.86	0.04	0
hCG1641625.3	129379	probe	123	12	1/ IVT	1911.69	9.41	1.69	203.1	0.11	0
hCG1641625.3	169988	probe	153	97	1/ IVT	1870.7	16.9	1.65	110.69	0.07	0
hCG1641627.3	189366	probe	211	6	1/ IVT	71602	57.49	63.21	1245.44	0.04	0
hCG1641630.3	187111	probe	91	9	1/ IVT	297.92	0.37	0.24	297.92	2.68	1
hCG1641631.3	189406	probe	63	48	1/ IVT	14061.1	59.6	11.47	235.92	0.04	0
hCG1641635.4	233109	probe	117	138	1/ IVT	1150.5	7.97	0.94	144.35	0.13	64
hCG1641642.1	169857	probe	83	1	1/ IVT	15703.3	27.66	12.81	567.77	0.05	0
hCG1641647.2	160812	probe	224	131	1/ IVT	174962	56.2	154.46	3113.11	0.04	0
hCG1641650.3	213263	probe	92	127	1/ IVT	1749.74	-0.12	1.43	1749.74	8.42	1
hCG1641653.2	233820	probe	156	72	1/ IVT	640.78	1.13	0.57	567.03	0.89	0
hCG1641665.1	106740	probe	178	70	1/ IVT	3504.38	21.76	3.09	161.03	0.06	0
hCG1641666.1	169493	probe	57	110	1/ IVT	579237	82.9	472.46	6986.8	0.04	0
hCG1641678.1	195213	probe	112	128	1/ IVT	760024	61.68	619.92	12322.7	0.04	0
hCG1641685.3	236397	probe	179	14	1/ IVT	1.46832e+06	96.97	1296.23	15141.7	0.04	0
hCG1641688.2	181876	probe	181	47	1/ IVT	6243.38	37.29	5.51	167.43	0.05	0
hCG1641692.2	229867	probe	134	92	1/ IVT	842744	40.15	743.97	20989.7	0.05	0
hCG1641699.4	197450	probe	230	74	1/ IVT	1829.86	3.94	1.62	464.94	0.26	0
hCG16417.2	153243	probe	138	7	1/ IVT	164768	41.58	145.46	3963.1	0.05	0
hCG1641702.3	212674	probe	19	10	1/ IVT	257.77	-0.46	0.21	257.77	2.15	1
hCG1641703.2	182281	probe	101	156	1/ IVT	892203	81.23	727.73	10984	0.04	0
hCG1641707.4	105686	probe	123	135	1/ IVT	6781.66	9.01	5.99	752.88	0.12	0
hCG1641715.4	138809	probe	133	58	1/ IVT	6659	38.06	5.88	174.94	0.05	0
hCG1641716.3	121227	probe	207	116	1/ IVT	186027	61.43	164.22	3028.36	0.04	0
hCG1641721.4	169642	probe	37	48	1/ IVT	384.31	-0.18	0.31	384.31	5.56	1
hCG1641723.3	150804	probe	38	118	1/ IVT	530.82	0	0.43	530.82	270.92	1
hCG1641727.2	230526	probe	127	118	1/ IVT	363.78	2.23	0.32	162.95	0.45	0
hCG1641730.3	202795	probe	69	132	1/ IVT	2334.18	3.5	1.9	667.76	0.29	0
hCG1641733.2	121093	probe	122	151	1/ IVT	205.85	0.34	0.18	205.85	2.92	1
hCG1641736.2	163598	probe	139	42	1/ IVT	2802.5	19.96	2.47	140.4	0.06	0
hCG1641737.2	104890	probe	191	63	1/ IVT	32722.6	100.94	28.89	324.19	0.04	64
hCG1641751.3	714115	probe	190	131	1/ IVT	1282.79	23.69	1.13	54.16	0.06	0
hCG1641752.3	224412	probe	185	112	1/ IVT	7103.37	46.15	6.27	153.92	0.04	0
hCG1641752.3	101122	probe	203	3	1/ IVT	558.7	3	0.49	186.17	0.34	0
hCG1641754.3	197256	probe	237	50	1/ IVT	1500.4	6.72	1.32	223.43	0.15	0
hCG1641756.3	164097	probe	96	114	1/ IVT	510.66	0.28	0.42	510.66	3.61	1
hCG1641756.3	102684	probe	149	73	1/ IVT	197.36	-0.03	0.17	197.36	34.54	1
hCG1641757.2	200516	probe	26	114	1/ IVT	8155.13	47.07	6.65	173.25	0.04	0
hCG1641761.3	136853	probe	98	146	1/ IVT	1146.97	-1.11	0.94	1146.97	0.9	1
hCG1641764.3	119763	probe	25	67	1/ IVT	570728	101.95	465.52	5598.31	0.04	0
hCG1641769.2	236621	probe	116	69	1/ IVT	619168	78.98	505.03	7839.76	0.04	0
hCG1641774.2	143863	probe	5	107	1/ IVT	18539.4	53.75	15.12	344.95	0.04	0
hCG1641777.3	193683	probe	106	77	1/ IVT	783.56	3.27	0.64	239.75	0.31	0
hCG1641780.2	129133	probe	119	30	1/ IVT	12960.4	44.83	10.57	289.12	0.04	0
hCG1641781.2	193172	probe	103	62	1/ IVT	1394.42	3.07	1.14	454.23	0.33	0
hCG1641782.1	167512	probe	228	18	1/ IVT	14065.4	39.19	12.42	358.9	0.05	0
hCG1641783.1	178056	probe	105	116	1/ IVT	507.13	0.85	0.41	507.13	1.18	1
hCG1641784.2	119151	probe	106	116	1/ IVT	251462	74.64	205.11	3368.89	0.04	0
hCG1641787.3	172036	probe	199	123	1/ IVT	115.13	-1.75	0.1	115.13	0.57	1
hCG1641788.3	181200	probe	230	158	1/ IVT	13236.4	24.19	11.69	547.29	0.06	0
hCG1641789.3	144407	probe	138	128	1/ IVT	319.37	0.44	0.28	319.37	2.3	1
hCG1641791.3	236364	probe	56	105	1/ IVT	334261	79.35	272.64	4212.58	0.04	0
hCG1641796.2	231257	probe	230	19	1/ IVT	142.84	0.93	0.13	142.84	1.08	1
hCG1641799.4	231181	probe	85	58	1/ IVT	222.18	-0.1	0.18	222.18	10.17	1
hCG1641804.3	171575	probe	185	75	1/ IVT	297.83	2.89	0.26	103.16	0.35	0
hCG1641814.2	145937	probe	97	106	1/ IVT	5924.98	28.86	4.83	205.28	0.05	0
hCG1641818.3	119865	probe	108	157	1/ IVT	432.09	1.98	0.35	218.61	0.51	0
hCG1641819.3	145459	probe	18	132	1/ IVT	137.72	-1.03	0.11	137.72	0.97	1
hCG1641822.4	110802	probe	106	112	1/ IVT	57609.8	59.13	46.99	974.26	0.04	0
hCG1641824.4	135422	probe	96	88	1/ IVT	360.98	-0.69	0.29	360.98	1.45	1
hCG1641825.3	233366	probe	9	71	1/ IVT	6472.43	44.02	5.28	147.03	0.04	0
hCG1641832.3	133933	probe	202	104	1/ IVT	1225.16	1.08	1.08	1134	0.93	0
hCG1641833.3	198223	probe	149	7	1/ IVT	546.48	-0.97	0.48	546.48	1.03	1
hCG1641833.3	234605	probe	230	146	1/ IVT	664.97	-0.99	0.59	664.97	1.01	1
hCG1641837.2	659748	probe	90	6	1/ IVT	21314.5	20.79	17.39	1025.4	0.06	0
hCG1641845.2	181670	probe	167	124	1/ IVT	774.41	1.71	0.68	453.02	0.59	0
hCG1641860.4	153385	probe	175	68	1/ IVT	6848.7	32.72	6.05	209.3	0.05	0
hCG1641866.1	198154	probe	43	117	1/ IVT	1040.04	-0.02	0.85	1040.04	65.24	1
hCG1641869.2	120117	probe	151	24	1/ IVT	346.73	-0.15	0.31	346.73	6.78	1
hCG1641872.3	229412	probe	81	48	1/ IVT	1962.17	13.72	1.6	143.04	0.08	0
hCG1641874.2	104878	probe	139	63	1/ IVT	143.43	-0.22	0.13	143.43	4.61	1
hCG1641883.2	141071	probe	179	158	1/ IVT	5332.52	24.31	4.71	219.39	0.06	0
hCG1641887.3	178269	probe	27	59	1/ IVT	974195	85.47	794.61	11398	0.04	0
hCG1641895.2	170223	probe	179	41	1/ IVT	520036	103.07	459.09	5045.49	0.04	0
hCG1641896.4	200885	probe	154	1	1/ IVT	506.68	0.51	0.45	506.68	1.98	1
hCG1641900.2	164008	probe	98	77	1/ IVT	5684.31	23.09	4.64	246.14	0.06	0
hCG1641902.2	236495	probe	63	143	1/ IVT	28981.3	91.29	23.64	317.46	0.04	64
hCG1641905.4	196743	probe	230	122	1/ IVT	313.67	3.06	0.28	102.46	0.33	0
hCG1641907.2	114692	probe	127	111	1/ IVT	217.13	-1.96	0.19	217.13	0.51	1
hCG1641913.2	229771	probe	47	52	1/ IVT	269.89	1.3	0.22	206.99	0.77	0
hCG1641919.3	233162	probe	145	145	1/ IVT	1625.41	10.56	1.43	153.98	0.1	0
hCG1641926.2	135526	probe	130	43	1/ IVT	453.8	1.14	0.4	397.79	0.88	0
hCG1641929.1	129802	probe	83	135	1/ IVT	10490.5	21.48	8.56	488.38	0.06	0
hCG1641930.2	128923	probe	191	7	1/ IVT	3245.74	10.92	2.87	297.32	0.1	0
hCG1641932.2	211285	probe	99	42	1/ IVT	1.24157e+06	72.1	1012.69	17220.9	0.04	0
hCG1641945.4	232398	probe	209	134	1/ IVT	331.17	-0.5	0.29	331.17	1.99	1
hCG1641949.2	234176	probe	235	7	1/ IVT	150.52	-0.31	0.13	150.52	3.18	1
hCG1641952.3	132030	probe	148	117	1/ IVT	276.07	0	0.24	276.07	906.77	1
hCG1641955.3	191090	probe	11	155	1/ IVT	175.17	0.11	0.14	175.17	9.48	1
hCG1641961.3	172158	probe	197	110	1/ IVT	129.13	-0.17	0.11	129.13	5.95	1
hCG1641962.2	191402	probe	99	50	1/ IVT	403.51	1.83	0.33	220.6	0.55	0
hCG1641962.2	229637	probe	111	78	1/ IVT	152.87	0.73	0.12	152.87	1.37	1
hCG1641974.2	196184	probe	12	123	1/ IVT	23375.4	53.99	19.07	432.99	0.04	0
hCG1641980.5	215650	probe	64	74	1/ IVT	67549.4	100.01	55.1	675.45	0.04	0
hCG1641980.5	234709	probe	153	106	1/ IVT	591.15	1.56	0.52	378.34	0.64	0
hCG16420.3	207619	probe	52	31	1/ IVT	940.9	4.31	0.77	218.18	0.23	0
hCG1642005.2	167160	probe	185	30	1/ IVT	401.57	4.72	0.35	85	0.22	0
hCG1642007.4	236904	probe	144	49	1/ IVT	851627	57.75	751.82	14745.6	0.04	0
hCG1642013.3	161355	probe	107	116	1/ IVT	1154.61	2.56	0.94	451.38	0.39	0
hCG1642014.2	228613	probe	223	73	1/ IVT	82.28	-1.04	0.07	82.28	0.96	1
hCG1642024.3	233788	probe	184	62	1/ IVT	68.15	-0.14	0.06	68.15	7.15	1
hCG1642031.1	125382	probe	28	36	1/ IVT	259.32	1.53	0.21	169.2	0.65	0
hCG1642034.3	100348	probe	31	74	1/ IVT	214.15	0.35	0.17	214.15	2.83	1
hCG1642036.2	699154	probe	71	6	1/ IVT	8336.08	9.79	6.8	851.38	0.11	0
hCG1642036.2	256245	probe	210	130	1/ IVT	605.6	4.46	0.53	135.73	0.23	0
hCG1642042.4	141171	probe	27	71	1/ IVT	267.78	-1.16	0.22	267.78	0.86	1
hCG1642043.1	234761	probe	16	98	1/ IVT	191730	81.47	156.39	2353.51	0.04	0
hCG1642044.3	230790	probe	35	70	1/ IVT	1179.44	6.7	0.96	176.14	0.15	0
hCG1642045.3	395408	probe	151	147	1/ IVT	316.39	-0.49	0.28	316.39	2.03	1
hCG1642046.1	230369	probe	64	68	1/ IVT	7099.61	7.08	5.79	1002.49	0.15	0
hCG1642047.3	107085	probe	108	122	1/ IVT	5408.47	29	4.41	186.5	0.05	0
hCG1642059.3	193586	probe	47	13	1/ IVT	3402.41	3.97	2.78	858.1	0.25	0
hCG1642062.1	163851	probe	3	17	1/ IVT	51189.7	65.84	41.75	777.45	0.04	0
hCG1642068.3	188013	probe	112	65	1/ IVT	133.6	-0.78	0.11	133.6	1.29	1
hCG1642079.2	175188	probe	52	66	1/ IVT	18344	39.75	14.96	461.48	0.04	0
hCG1642082.1	152207	probe	28	79	1/ IVT	534788	116.38	436.2	4595.25	0.04	0
hCG1642084.3	226948	probe	130	95	1/ IVT	4441.18	7.6	3.92	584.38	0.14	64
hCG1642085.3	190112	probe	6	18	1/ IVT	352.78	5.47	0.29	64.52	0.19	0
hCG1642089.3	236166	probe	56	138	1/ IVT	37788.9	74.64	30.82	506.31	0.04	0
hCG1642096.3	224965	probe	146	89	1/ IVT	22086.8	59.83	19.5	369.16	0.04	0
hCG1642097.2	171807	probe	29	8	1/ IVT	204.58	-1.85	0.17	204.58	0.54	1
hCG1642102.2	129778	probe	156	53	1/ IVT	10747.7	32.54	9.49	330.28	0.05	0
hCG1642105.2	205196	probe	230	16	1/ IVT	27657.2	89.97	24.42	307.39	0.04	0
hCG1642105.2	211262	probe	230	126	1/ IVT	3756.49	0.11	3.32	3756.49	8.76	1
hCG1642107.3	178783	probe	176	143	1/ IVT	5594.88	25.96	4.94	215.5	0.05	0
hCG1642115.1	184569	probe	179	3	1/ IVT	174.63	-1.21	0.15	174.63	0.83	1
hCG1642121.3	167726	probe	230	111	1/ IVT	23262.8	17.87	20.54	1302.07	0.07	0
hCG1642124.3	229948	probe	105	65	1/ IVT	164	-1.57	0.13	164	0.64	1
hCG1642128.2	236184	probe	81	3	1/ IVT	323.97	-1.08	0.26	323.97	0.93	1
hCG1642135.3	153495	probe	225	133	1/ IVT	8161.48	43.92	7.2	185.85	0.04	0
hCG1642143.3	144842	probe	133	114	1/ IVT	99684.7	58.62	88	1700.53	0.04	0
hCG1642147.2	146870	probe	170	74	1/ IVT	441.98	-0.66	0.39	441.98	1.52	1
hCG1642151.3	229926	probe	143	23	1/ IVT	373.98	2.77	0.33	134.92	0.36	0
hCG1642153.2	140786	probe	187	63	1/ IVT	10800.7	59.05	9.53	182.92	0.04	0
hCG1642154.3	230210	probe	214	117	1/ IVT	1422.94	11.63	1.26	122.3	0.09	0
hCG1642159.3	195031	probe	47	49	1/ IVT	151.16	-3.02	0.12	151.16	0.33	131073
hCG1642159.3	191607	probe	81	85	1/ IVT	194.19	-2.07	0.16	194.19	0.49	1
hCG1642159.3	234908	probe	108	147	1/ IVT	340.23	1.52	0.28	224.43	0.66	0
hCG1642160.4	113019	probe	94	122	1/ IVT	112539	34.17	91.79	3293.71	0.05	0
hCG1642160.4	174658	probe	166	150	1/ IVT	86.59	-2.49	0.08	86.59	0.4	1
hCG1642166.3	125040	probe	223	1	1/ IVT	115.14	0.46	0.1	115.14	2.17	1
hCG1642170.3	190885	probe	55	29	1/ IVT	11663.3	33.6	9.51	347.08	0.05	0
[truncated: 30,879 more rows]

## Sheet: no bad flag
GENE_ID	PROBE_ID	PROBE_TYPE	ROW	COLUMN	HB0055A_10/27/06_1:44_PM_SAMPLE_NAME	HB0055A_10/27/06_1:44_PM_SIGNAL	HB0055A_10/27/06_1:44_PM_S/N	HB0055A_10/27/06_1:44_PM_ASSAY_NORMALIZED_SIGNAL	HB0055A_10/27/06_1:44_PM_SDEV	HB0055A_10/27/06_1:44_PM_CV	HB0055A_10/27/06_1:44_PM_FLAGS
hCG1990839	235552	probe	25	157	1/ IVT	1.53618e+06	114.12	1252.99	13461.6	0.04	68
hCG1647520.2	184655	probe	197	159	1/ IVT	192.43	0.04	0.17	192.43	24.18	65
hCG2036874	186356	probe	128	16	1/ IVT	96.09	-0.37	0.08	96.09	2.73	65
hCG2040517	143174	probe	37	118	1/ IVT	157.24	-0.47	0.13	157.24	2.14	65
hCG22566.3	191405	probe	226	97	1/ IVT	174.33	0.96	0.15	174.33	1.04	65
hCG27230.2	213881	probe	161	113	1/ IVT	124.48	0.46	0.11	124.48	2.17	65
hCG27411.2	170623	probe	23	99	1/ IVT	131.54	0.63	0.11	131.54	1.58	65
hCG28202.1	222129	probe	14	48	1/ IVT	197.98	0.33	0.16	197.98	3.02	65
395233	226368	probe	191	34	1/ IVT	10102.9	32.55	8.92	310.36	0.05	64
AK097814.1	229808	probe	219	132	1/ IVT	3514.59	16.31	3.1	215.49	0.07	64
AK127225.1	230441	probe	73	31	1/ IVT	1071.5	5.24	0.87	204.5	0.19	64
BC009864.2	217808	probe	172	69	1/ IVT	231.14	1.55	0.2	149.48	0.65	64
BC071855.1	145023	probe	88	42	1/ IVT	5361.12	22.51	4.37	238.14	0.06	64
ENST00000340878	185320	probe	163	134	1/ IVT	378.24	5.12	0.33	73.93	0.2	64
hCG14644.2	173909	probe	174	125	1/ IVT	93357.5	116.5	82.42	801.34	0.04	64
hCG14731.3	102968	probe	31	75	1/ IVT	1980.01	6.29	1.62	314.86	0.16	64
hCG14802.2	104683	probe	70	47	1/ IVT	130715	110.08	106.62	1187.44	0.04	64
hCG14882.3	139262	probe	22	89	1/ IVT	171463	122.13	139.85	1403.9	0.04	64
hCG14927.3	227114	probe	131	109	1/ IVT	150.85	2.5	0.13	60.4	0.4	64
hCG14929.3	132658	probe	27	89	1/ IVT	70792.5	116.99	57.74	605.11	0.04	64
hCG15042.3	191084	probe	19	111	1/ IVT	175159	105.18	142.87	1665.27	0.04	64
hCG15165.2	169278	probe	19	110	1/ IVT	59416.9	89.3	48.46	665.38	0.04	64
hCG15285.3	137428	probe	5	38	1/ IVT	48193.6	93.71	39.31	514.3	0.04	64
hCG15287.3	192382	probe	7	21	1/ IVT	42320.8	95.3	34.52	444.08	0.04	64
hCG15367.4	137292	probe	35	63	1/ IVT	28835.6	92.56	23.52	311.52	0.04	64
hCG15371.4	141286	probe	188	27	1/ IVT	637292	130.15	562.6	4896.74	0.04	64
hCG15412.2	107810	probe	24	142	1/ IVT	61624.6	107.38	50.26	573.88	0.04	64
hCG15521.3	212778	probe	174	55	1/ IVT	54232.4	120.2	47.88	451.18	0.04	64
hCG15685.3	104625	probe	193	65	1/ IVT	1.0062e+06	133.43	888.27	7540.96	0.04	64
hCG15697.2	124730	probe	12	104	1/ IVT	13158	80.2	10.73	164.07	0.04	64
hCG15775.4	105260	probe	168	50	1/ IVT	39665.1	108.29	35.02	366.29	0.04	64
hCG15781.3	217339	probe	12	111	1/ IVT	157464	91.3	128.44	1724.7	0.04	64
hCG15894.3	129144	probe	151	96	1/ IVT	7883.54	37.75	6.96	208.81	0.05	64
hCG15902.3	188922	probe	196	65	1/ IVT	69459.8	111.62	61.32	622.28	0.04	64
hCG15937.2	231342	probe	183	114	1/ IVT	131057	104.23	115.7	1257.37	0.04	64
hCG15982.3	145093	probe	28	149	1/ IVT	148480	107.63	121.11	1379.57	0.04	64
hCG16023.3	170781	probe	39	153	1/ IVT	362208	102.43	295.44	3536.23	0.04	64
hCG16030.2	186894	probe	4	35	1/ IVT	51766.2	98.61	42.22	524.93	0.04	64
hCG16078.3	152164	probe	4	34	1/ IVT	6314.26	35.01	5.15	180.35	0.05	64
hCG16082.3	146111	probe	96	121	1/ IVT	1170.4	6.09	0.95	192.33	0.17	64
hCG16121.3	211309	probe	164	58	1/ IVT	42819.5	105.39	37.8	406.28	0.04	64
hCG16232.2	206612	probe	27	72	1/ IVT	341698	128.63	278.71	2656.42	0.04	64
hCG16372.3	176899	probe	58	145	1/ IVT	875.76	3.92	0.71	223.13	0.26	64
hCG1639748.3	208956	probe	36	5	1/ IVT	148285	89.26	120.95	1661.36	0.04	64
hCG1640129.2	317016	probe	77	131	1/ IVT	15619.6	79.12	12.74	197.43	0.04	64
hCG1640170.3	124083	probe	37	145	1/ IVT	650467	109.98	530.56	5914.23	0.04	64
hCG16402.2	116004	probe	24	4	1/ IVT	24135.3	99.5	19.69	242.57	0.04	64
hCG1640282.3	142074	probe	176	151	1/ IVT	632198	107.94	558.1	5856.75	0.04	64
hCG1640331.3	201584	probe	164	141	1/ IVT	388.83	3.13	0.34	124.26	0.32	64
hCG1640622.3	196451	probe	149	107	1/ IVT	1378.76	10.9	1.22	126.5	0.1	64
hCG1640756.3	134269	probe	72	130	1/ IVT	18245.5	80.96	14.88	225.37	0.04	64
hCG1640855.2	208312	probe	176	138	1/ IVT	357250	110.18	315.38	3242.43	0.04	64
hCG1640923.2	216937	probe	112	17	1/ IVT	1051.98	7.81	0.86	134.7	0.13	64
hCG1640974.3	228045	probe	8	38	1/ IVT	349888	91.84	285.39	3809.91	0.04	64
hCG1641023.2	149846	probe	26	66	1/ IVT	613328	113.65	500.26	5396.87	0.04	64
hCG1641550.3	142494	probe	38	66	1/ IVT	361189	108.64	294.61	3324.7	0.04	64
hCG1641617.1	714590	probe	171	66	1/ IVT	39395.2	115.44	34.78	341.26	0.04	64
hCG1641635.4	233109	probe	117	138	1/ IVT	1150.5	7.97	0.94	144.35	0.13	64
hCG1641737.2	104890	probe	191	63	1/ IVT	32722.6	100.94	28.89	324.19	0.04	64
hCG1641902.2	236495	probe	63	143	1/ IVT	28981.3	91.29	23.64	317.46	0.04	64
hCG1642084.3	226948	probe	130	95	1/ IVT	4441.18	7.6	3.92	584.38	0.14	64
hCG1642531.2	135140	probe	26	68	1/ IVT	608980	90.83	496.72	6704.85	0.04	64
hCG1642689.3	236786	probe	163	41	1/ IVT	1.05012e+06	121.13	927.04	8669.67	0.04	64
hCG1642748.3	112068	probe	123	115	1/ IVT	156081	105.05	137.79	1485.84	0.04	64
hCG1642820.1	174855	probe	130	101	1/ IVT	223890	120.87	197.65	1852.37	0.04	64
hCG1643101.3	100390	probe	77	71	1/ IVT	579680	104.89	472.82	5526.31	0.04	64
hCG1643142.3	133249	probe	38	17	1/ IVT	30467.2	102.7	24.85	296.67	0.04	64
hCG16432.2	185855	probe	222	93	1/ IVT	438323	121.88	386.95	3596.42	0.04	64
hCG1643228.2	206563	probe	28	63	1/ IVT	27810.3	84.89	22.68	327.6	0.04	64
hCG1643440.3	100702	probe	181	77	1/ IVT	1.00662e+06	113.19	888.64	8892.94	0.04	64
hCG1643445.2	209307	probe	78	46	1/ IVT	977172	108.33	797.03	9020.01	0.04	64
hCG1643458.2	164213	probe	146	58	1/ IVT	907.18	10.48	0.8	86.6	0.1	64
hCG16435.3	167471	probe	4	29	1/ IVT	49279.4	100.47	40.19	490.5	0.04	64
hCG1643837.2	236500	probe	76	143	1/ IVT	1.52608e+06	106.4	1244.75	14343.2	0.04	64
hCG1644093.3	141469	probe	78	144	1/ IVT	409515	91.6	334.02	4470.53	0.04	64
hCG1644183.3	230435	probe	35	65	1/ IVT	115300	91.77	94.04	1256.45	0.04	64
hCG1644240.4	162128	probe	69	103	1/ IVT	159205	107.9	129.86	1475.44	0.04	64
hCG1644268.2	715617	probe	153	8	1/ IVT	3719.02	8.96	3.28	414.87	0.12	64
hCG1644293.2	236335	probe	25	69	1/ IVT	482272	116.7	393.37	4132.6	0.04	64
hCG1644300.2	236669	probe	32	70	1/ IVT	235389	103.02	192	2284.86	0.04	64
hCG1644323.2	236594	probe	17	30	1/ IVT	251100	98.97	204.81	2537.08	0.04	64
hCG1644369.3	172785	probe	29	9	1/ IVT	71393.4	102.31	58.23	697.81	0.04	64
hCG1644378.4	134862	probe	62	69	1/ IVT	49591.5	97.31	40.45	509.62	0.04	64
hCG1644410.2	125410	probe	163	13	1/ IVT	5428.82	33.6	4.79	161.58	0.05	64
hCG1644608.2	167072	probe	18	39	1/ IVT	87438.1	87.61	71.32	998.07	0.04	64
hCG1646047.2	140210	probe	221	10	1/ IVT	1633.11	11.23	1.44	145.43	0.1	64
hCG1646516.2	114288	probe	139	22	1/ IVT	1520.59	10.89	1.34	139.64	0.1	64
hCG1646621.2	213966	probe	194	27	1/ IVT	312327	64.21	275.72	4864.3	0.04	64
hCG1646643.3	147392	probe	172	81	1/ IVT	191817	118.66	169.34	1616.49	0.04	64
hCG1646789.3	143968	probe	156	138	1/ IVT	1423.78	11.69	1.26	121.82	0.09	64
hCG1647136.3	158798	probe	66	153	1/ IVT	2287.35	12.01	1.87	190.53	0.09	64
hCG1647378.3	130790	probe	25	14	1/ IVT	147021	117.33	119.92	1253.09	0.04	64
hCG1647653.3	216905	probe	62	24	1/ IVT	11592.2	94.51	9.46	122.66	0.04	64
hCG1647962.3	229316	probe	4	101	1/ IVT	30844.4	91.09	25.16	338.61	0.04	64
hCG16501.4	169639	probe	17	109	1/ IVT	50642.4	77.92	41.31	649.93	0.04	64
hCG16505.3	236819	probe	197	106	1/ IVT	177725	114.96	156.9	1546.02	0.04	64
hCG1652313.1	209685	probe	74	57	1/ IVT	35081.2	97.98	28.61	358.04	0.04	64
hCG16540.3	101588	probe	70	144	1/ IVT	87007	105.9	70.97	821.61	0.04	64
hCG1654128.2	176654	probe	190	132	1/ IVT	328.2	6.24	0.29	52.58	0.16	64
hCG1654260.2	132564	probe	151	118	1/ IVT	89.16	1.95	0.08	45.75	0.51	64
hCG16549.4	122288	probe	195	61	1/ IVT	18886.3	83.66	16.67	225.75	0.04	64
hCG16584.2	120765	probe	22	63	1/ IVT	71664.1	100.9	58.45	710.28	0.04	64
hCG1658529.4	148572	probe	71	103	1/ IVT	249141	93.06	203.21	2677.26	0.04	64
hCG16607.2	166387	probe	45	154	1/ IVT	3809.97	29.18	3.11	130.55	0.05	64
hCG16628.3	181154	probe	144	117	1/ IVT	1870.73	6.85	1.65	273.23	0.15	64
hCG16634.3	173450	probe	26	147	1/ IVT	20389	95.88	16.63	212.64	0.04	64
hCG16661.1	114492	probe	63	134	1/ IVT	75844.2	97.43	61.86	778.49	0.04	64
hCG16691.5	144256	probe	78	128	1/ IVT	74556.3	99.23	60.81	751.35	0.04	64
hCG16855.3	220389	probe	106	67	1/ IVT	1410.15	14.82	1.15	95.13	0.08	64
hCG16918.3	210624	probe	141	91	1/ IVT	384.75	2.06	0.34	187.05	0.49	64
hCG16922.2	120472	probe	97	139	1/ IVT	564.76	5.61	0.46	100.66	0.18	64
hCG16967.3	164529	probe	34	72	1/ IVT	82554.5	109.6	67.34	753.22	0.04	64
hCG17002.2	166108	probe	6	37	1/ IVT	39741.2	84.05	32.42	472.82	0.04	64
hCG17115.2	194103	probe	73	62	1/ IVT	103278	97.17	84.24	1062.86	0.04	64
hCG17134.2	102632	probe	19	114	1/ IVT	33775.5	86.26	27.55	391.57	0.04	64
hCG17154.3	152725	probe	33	89	1/ IVT	86755.3	96.18	70.76	902.04	0.04	64
hCG1725347.2	144872	probe	14	21	1/ IVT	31610.2	100.3	25.78	315.15	0.04	64
hCG17261.3	174460	probe	238	57	1/ IVT	396145	97.29	349.72	4071.76	0.04	64
hCG1728625.1	649805	probe	48	106	1/ IVT	535.87	4.87	0.44	110.05	0.21	64
hCG1730647.2	228607	probe	149	84	1/ IVT	3495.4	12.7	3.09	275.15	0.09	64
hCG1731120.2	129837	probe	28	84	1/ IVT	76262.1	107.5	62.2	709.39	0.04	64
hCG1731806.1	179136	probe	18	61	1/ IVT	1013.22	5.07	0.83	199.93	0.2	64
hCG17321.3	191530	probe	196	79	1/ IVT	42116.8	100.09	37.18	420.78	0.04	64
hCG1734936.2	183553	probe	198	145	1/ IVT	157802	118.54	139.31	1331.17	0.04	64
hCG1736453	120100	probe	132	112	1/ IVT	1478.44	6	1.31	246.24	0.17	64
hCG1737100.2	153019	probe	187	66	1/ IVT	21635.5	95.94	19.1	225.52	0.04	64
hCG1739388.1	236952	probe	137	106	1/ IVT	528211	100.03	466.3	5280.29	0.04	64
hCG17406.4	203011	probe	32	72	1/ IVT	116213	99.37	94.79	1169.53	0.04	64
hCG1741198.2	235163	probe	68	104	1/ IVT	516.1	10.31	0.42	50.05	0.1	64
hCG1743503.3	101498	probe	168	122	1/ IVT	187868	128.72	165.85	1459.5	0.04	64
hCG1743714.2	181512	probe	33	66	1/ IVT	373817	110.08	304.91	3395.97	0.04	64
hCG1747826.2	10715552	probe	185	61	1/ IVT	115327	109.61	101.81	1052.11	0.04	64
hCG1748287.2	120132	probe	55	95	1/ IVT	2216.98	6.82	1.81	325.28	0.15	64
hCG1758968.1	209686	probe	78	106	1/ IVT	237396	111.15	193.63	2135.74	0.04	64
hCG17677.3	188936	probe	5	103	1/ IVT	94828.1	121.76	77.35	778.83	0.04	64
hCG17679.2	203065	probe	10	39	1/ IVT	89339.7	110.72	72.87	806.92	0.04	64
hCG17690.3	100430	probe	71	109	1/ IVT	98289.2	104.95	80.17	936.57	0.04	64
hCG1773148.2	232904	probe	235	110	1/ IVT	134902	108.77	119.09	1240.28	0.04	64
hCG1773243.2	175914	probe	130	79	1/ IVT	1537.01	7.6	1.36	202.27	0.14	64
hCG1773668.2	194346	probe	1	109	1/ IVT	189666	100.29	154.7	1891.22	0.04	64
hCG1774778.1	199491	probe	15	37	1/ IVT	105907	97.45	86.38	1086.77	0.04	64
hCG1775037.1	154009	probe	86	53	1/ IVT	899.93	11.37	0.73	79.14	0.09	64
hCG1775038.2	115239	probe	201	157	1/ IVT	1862.26	18.8	1.64	99.05	0.07	64
hCG1776254.2	114784	probe	194	37	1/ IVT	1059.34	10.01	0.94	105.83	0.11	64
hCG1776268.3	183086	probe	35	17	1/ IVT	2081.96	12.09	1.7	172.15	0.09	64
hCG1776670.3	236556	probe	10	33	1/ IVT	51282.9	82.35	41.83	622.78	0.04	64
hCG1776947.1	120876	probe	124	142	1/ IVT	613.2	3.5	0.54	175.09	0.29	64
hCG1777126.2	107040	probe	187	75	1/ IVT	4746.89	47.6	4.19	99.72	0.04	64
hCG1778021.2	128108	probe	65	145	1/ IVT	117281	105.09	95.66	1116.03	0.04	64
hCG1778873.1	195958	probe	147	148	1/ IVT	3167.98	27.7	2.8	114.38	0.05	64
hCG1779136.2	590611	probe	71	56	1/ IVT	78386.4	100.52	63.94	779.78	0.04	64
hCG1779136.2	138694	probe	227	91	1/ IVT	88086.7	120.28	77.76	732.36	0.04	64
hCG1779409.2	100524	probe	170	58	1/ IVT	37134	102.15	32.78	363.54	0.04	64
hCG1779482.1	115953	probe	237	99	1/ IVT	40115.9	96.33	35.41	416.45	0.04	64
hCG1779599.1	185358	probe	23	144	1/ IVT	1.29337e+06	128.78	1054.94	10043.6	0.04	64
hCG1779673.1	174719	probe	75	44	1/ IVT	77299.5	96.17	63.05	803.77	0.04	64
hCG1779985.2	194565	probe	74	29	1/ IVT	2022.2	30.57	1.65	66.14	0.05	64
hCG1780140.1	236697	probe	9	109	1/ IVT	460977	111.15	376	4147.5	0.04	64
hCG1780536.1	161070	probe	68	72	1/ IVT	29497.4	99.47	24.06	296.53	0.04	64
hCG1781850.2	211011	probe	136	115	1/ IVT	86381	96.75	76.26	892.79	0.04	64
hCG1781938.3	124968	probe	65	37	1/ IVT	34584.4	120.85	28.21	286.17	0.04	64
hCG1782151.2	129095	probe	239	111	1/ IVT	142294	88.53	125.62	1607.27	0.04	64
hCG1782433.2	179419	probe	28	85	1/ IVT	163042	97.93	132.99	1664.86	0.04	64
hCG1782507.2	236164	probe	24	87	1/ IVT	1.00063e+06	113.09	816.16	8847.89	0.04	64
hCG1782975.2	139004	probe	168	84	1/ IVT	235498	113.63	207.9	2072.54	0.04	64
hCG1783044.1	109254	probe	6	114	1/ IVT	45250.6	103.02	36.91	439.22	0.04	64
hCG1783334.1	236251	probe	76	150	1/ IVT	1.34591e+06	107.58	1097.8	12510.5	0.04	64
hCG1784266.2	236458	probe	228	15	1/ IVT	1.23694e+06	109.17	1091.97	11330.5	0.04	64
hCG1784432.1	127474	probe	167	132	1/ IVT	29016.7	106.4	25.62	272.72	0.04	64
hCG1784848.2	229904	probe	24	89	1/ IVT	44207.1	82.86	36.06	533.49	0.04	64
hCG1786830.2	196168	probe	82	128	1/ IVT	40656.8	40.27	33.16	1009.68	0.04	64
hCG1786983.2	131844	probe	8	119	1/ IVT	505302	120.64	412.15	4188.51	0.04	64
hCG1787219.2	114180	probe	159	126	1/ IVT	1871.51	6.93	1.65	270.06	0.15	64
hCG1787550.2	181273	probe	106	132	1/ IVT	17864	79.41	14.57	224.96	0.04	64
hCG1787637.1	171021	probe	69	142	1/ IVT	54712.1	83.35	44.63	656.4	0.04	64
hCG1788221.2	156898	probe	186	76	1/ IVT	61892.8	123.44	54.64	501.41	0.04	64
hCG1789764.2	230080	probe	233	89	1/ IVT	333313	120.16	294.25	2773.82	0.04	64
hCG1790184.2	224053	probe	2	116	1/ IVT	65572	102.87	53.48	637.44	0.04	64
hCG1790293.1	233909	probe	67	110	1/ IVT	33542.3	94.86	27.36	353.58	0.04	64
hCG1790447.2	213392	probe	195	127	1/ IVT	410730	96.5	362.59	4256.22	0.04	64
hCG1790692.2	174805	probe	73	58	1/ IVT	139142	103.55	113.49	1343.76	0.04	64
hCG1790710.2	128262	probe	163	96	1/ IVT	81827.3	111.34	72.24	734.94	0.04	64
hCG1790787.2	228193	probe	178	135	1/ IVT	322476	114.67	284.68	2812.12	0.04	64
hCG17912.2	209632	probe	146	92	1/ IVT	12790.9	33.81	11.29	378.3	0.05	64
hCG1792223.3	132926	probe	127	107	1/ IVT	87812.7	132.07	77.52	664.91	0.04	64
hCG17934.3	204851	probe	235	37	1/ IVT	7854.28	77.05	6.93	101.94	0.04	64
hCG1793559.2	170231	probe	73	15	1/ IVT	2472.71	6.69	2.02	369.55	0.15	64
hCG1793747.3	205151	probe	61	147	1/ IVT	374053	111.99	305.1	3340.12	0.04	64
hCG1794018.2	212515	probe	84	46	1/ IVT	336.48	7.6	0.27	44.24	0.14	64
hCG1794453.3	229876	probe	77	62	1/ IVT	148340	106.51	120.99	1392.77	0.04	64
hCG1794591.2	160727	probe	75	135	1/ IVT	135517	94.27	110.53	1437.6	0.04	64
hCG1795560.2	229699	probe	207	72	1/ IVT	822.15	8.01	0.73	102.64	0.13	64
hCG1799751.2	138145	probe	133	76	1/ IVT	1731.69	13.16	1.53	131.57	0.09	64
hCG1803558.2	212989	probe	192	77	1/ IVT	1288.71	6.69	1.14	192.66	0.15	64
hCG18036.3	161818	probe	188	114	1/ IVT	337643	121.66	298.07	2775.29	0.04	64
hCG1805671.2	101505	probe	88	135	1/ IVT	2581.26	15.07	2.11	171.25	0.08	64
hCG1806413.2	192920	probe	71	124	1/ IVT	538764	112.13	439.44	4804.85	0.04	64
hCG1810805.2	186092	probe	66	124	1/ IVT	68863.5	95.94	56.17	717.78	0.04	64
hCG1810880.1	123584	probe	29	1	1/ IVT	101295	113.38	82.62	893.4	0.04	64
hCG1811074.1	206347	probe	73	70	1/ IVT	59584.7	104.89	48.6	568.06	0.04	64
hCG1811113.1	138519	probe	17	114	1/ IVT	58293.9	93.22	47.55	625.34	0.04	64
hCG1811453.1	113999	probe	190	119	1/ IVT	245.22	4.49	0.22	54.59	0.23	64
hCG1811629.1	158873	probe	89	42	1/ IVT	506.2	2.52	0.41	200.81	0.4	64
hCG1811739.1	230810	probe	64	119	1/ IVT	314552	102.79	256.57	3060.14	0.04	64
hCG1811779.1	171810	probe	21	4	1/ IVT	530.51	11.12	0.43	47.69	0.1	64
hCG1811821.1	196263	probe	1	104	1/ IVT	24580.9	79.69	20.05	308.46	0.04	64
hCG1811824.1	113338	probe	187	110	1/ IVT	87330.3	122.58	77.1	712.46	0.04	64
hCG1811886.1	166190	probe	162	75	1/ IVT	658.78	6.66	0.58	98.91	0.15	64
hCG1811991.1	124025	probe	64	150	1/ IVT	44724.7	72.45	36.48	617.32	0.04	64
hCG1813127.1	129624	probe	145	94	1/ IVT	565.43	3.58	0.5	158.08	0.28	64
hCG1813697.1	148909	probe	23	91	1/ IVT	63427.8	121.47	51.74	522.19	0.04	64
hCG1814523.1	165770	probe	31	154	1/ IVT	1.39786e+06	106.69	1140.17	13101.5	0.04	64
hCG1814591.1	145333	probe	17	101	1/ IVT	35247	92.59	28.75	380.68	0.04	64
hCG1815614.1	158398	probe	58	159	1/ IVT	3068.75	11.36	2.5	270.14	0.09	64
hCG1816622.1	482460	probe	195	93	1/ IVT	4652.48	23.28	4.11	199.87	0.06	64
hCG1817323.1	195578	probe	87	65	1/ IVT	1249.14	20.98	1.02	59.54	0.06	64
hCG1817456.1	166495	probe	41	51	1/ IVT	578.89	11.84	0.47	48.89	0.09	64
hCG1817776.1	117630	probe	165	64	1/ IVT	174635	121.27	154.17	1440.06	0.04	64
hCG1817829.1	113095	probe	12	145	1/ IVT	198833	114.36	162.18	1738.72	0.04	64
hCG1818101.3	119008	probe	35	154	1/ IVT	548450	113.53	447.35	4830.97	0.04	64
hCG1818183.1	171228	probe	235	98	1/ IVT	171002	125.88	150.96	1358.44	0.04	64
hCG1818263.1	135795	probe	124	105	1/ IVT	1632.65	12.78	1.44	127.73	0.09	64
hCG1818283.3	200743	probe	69	48	1/ IVT	79722.9	122.12	65.03	652.85	0.04	64
hCG1818507.1	109715	probe	79	24	1/ IVT	651.31	3.6	0.53	180.97	0.28	64
hCG1818525.1	111931	probe	236	37	1/ IVT	58956.6	94	52.05	627.19	0.04	64
hCG1818631.1	127162	probe	99	124	1/ IVT	7158.35	42.69	5.84	167.68	0.04	64
hCG1820360.1	151599	probe	37	61	1/ IVT	119467	97.52	97.44	1225.02	0.04	64
hCG1820431.1	103201	probe	10	104	1/ IVT	405823	105.33	331.01	3852.79	0.04	64
hCG1820488.1	206815	probe	185	48	1/ IVT	17821.9	95.11	15.73	187.39	0.04	64
hCG1820568.1	126215	probe	6	113	1/ IVT	67373	94.06	54.95	716.24	0.04	64
hCG1820573.1	127795	probe	65	157	1/ IVT	894653	104.3	729.73	8578.05	0.04	64
hCG1820651.1	326833	probe	37	64	1/ IVT	58072.2	111.44	47.37	521.1	0.04	64
hCG1820662.1	103491	probe	65	44	1/ IVT	147761	112.79	120.52	1310.03	0.04	64
hCG1820685.1	119392	probe	169	59	1/ IVT	210277	129.98	185.63	1617.72	0.04	64
hCG1820722.2	137330	probe	174	157	1/ IVT	397189	110.88	350.64	3581.99	0.04	64
hCG1820748.1	179063	probe	70	129	1/ IVT	55294.1	105.92	45.1	522.01	0.04	64
hCG1820768.1	150812	probe	154	131	1/ IVT	365.83	2.13	0.32	171.93	0.47	64
hCG1820836.2	207676	probe	235	107	1/ IVT	445711	97.9	393.47	4552.64	0.04	64
hCG1820901.1	192190	probe	9	35	1/ IVT	114722	107.58	93.57	1066.36	0.04	64
hCG1820980.1	135162	probe	75	41	1/ IVT	186838	121.65	152.4	1535.85	0.04	64
hCG18328.2	214525	probe	22	64	1/ IVT	98734	94.16	80.53	1048.53	0.04	64
hCG18330.3	126065	probe	67	122	1/ IVT	69907.2	82.61	57.02	846.19	0.04	64
hCG18341.4	197751	probe	25	99	1/ IVT	27142.4	90.59	22.14	299.62	0.04	64
hCG18438.3	185831	probe	196	150	1/ IVT	866.74	5.97	0.77	145.3	0.17	64
hCG18478.4	171352	probe	17	106	1/ IVT	28297.2	93.18	23.08	303.67	0.04	64
hCG18485.3	183842	probe	69	52	1/ IVT	142263	93.45	116.04	1522.42	0.04	64
hCG18528.2	120143	probe	63	130	1/ IVT	76502	83.88	62.4	912.05	0.04	64
hCG18538.3	170202	probe	127	58	1/ IVT	27186.5	48.56	24	559.84	0.04	64
hCG18603.3	143739	probe	137	148	1/ IVT	1119.14	5.28	0.99	212.13	0.19	64
hCG18713.3	108577	probe	14	108	1/ IVT	27870.8	80.91	22.73	344.47	0.04	64
hCG18756.4	139453	probe	3	109	1/ IVT	36809.7	92.39	30.02	398.4	0.04	64
hCG18809.3	156212	probe	7	110	1/ IVT	15873.8	86.75	12.95	182.98	0.04	64
hCG18830.3	186453	probe	5	27	1/ IVT	809537	115.96	660.3	6981.26	0.04	64
hCG18831.2	101985	probe	69	118	1/ IVT	164150	111.08	133.89	1477.73	0.04	64
hCG18949.3	180427	probe	24	64	1/ IVT	206713	101.85	168.61	2029.53	0.04	64
hCG18997.3	167868	probe	36	99	1/ IVT	46866	91.59	38.23	511.67	0.04	64
hCG19008.3	130747	probe	73	126	1/ IVT	1.03025e+06	100.25	840.33	10277.3	0.04	64
hCG19294.3	128565	probe	66	73	1/ IVT	44887.9	104.75	36.61	428.52	0.04	64
hCG19296.3	209756	probe	70	78	1/ IVT	224.03	2.45	0.18	91.43	0.41	64
hCG19318.3	171504	probe	70	105	1/ IVT	738.36	3.9	0.6	189.19	0.26	64
hCG19426.4	189139	probe	39	88	1/ IVT	2720.52	19.11	2.22	142.39	0.06	64
hCG19446.3	211439	probe	65	76	1/ IVT	26228.4	95.73	21.39	273.99	0.04	64
hCG19476.2	189197	probe	19	32	1/ IVT	52194.2	79	42.57	660.72	0.04	64
hCG19686.3	102828	probe	18	109	1/ IVT	45992.7	93.65	37.51	491.13	0.04	64
hCG19718.2	102218	probe	226	119	1/ IVT	301875	118.38	266.5	2550.03	0.04	64
hCG1978942	229523	probe	218	111	1/ IVT	500.28	5.37	0.44	93.15	0.19	64
hCG1979495	234266	probe	136	27	1/ IVT	4931.42	28.67	4.35	172	0.05	64
hCG1980047	132747	probe	230	33	1/ IVT	148630	139.17	131.21	1068	0.04	64
hCG1980474	191942	probe	201	51	1/ IVT	3829.6	34.62	3.38	110.61	0.05	64
hCG1980622.1	100972	probe	159	73	1/ IVT	1177.8	6.34	1.04	185.64	0.16	64
hCG1980678	106373	probe	238	116	1/ IVT	68407.1	106.02	60.39	645.22	0.04	64
hCG1980758	228749	probe	157	137	1/ IVT	296.23	1.6	0.26	185.36	0.63	64
hCG1980824	190978	probe	236	22	1/ IVT	107589	117.56	94.98	915.22	0.04	64
hCG1980915	192726	probe	72	61	1/ IVT	29742.7	87.5	24.26	339.9	0.04	64
hCG1981929	139072	probe	34	107	1/ IVT	332792	113.74	271.44	2925.86	0.04	64
hCG1982192	222543	probe	63	72	1/ IVT	626.79	4.17	0.51	150.14	0.24	64
hCG1982215.1	167693	probe	47	112	1/ IVT	387.88	2.88	0.32	134.51	0.35	64
hCG1982625.1	163292	probe	195	95	1/ IVT	1152.19	10.43	1.02	110.51	0.1	64
hCG1982904	191627	probe	34	96	1/ IVT	28108.7	96.95	22.93	289.92	0.04	64
hCG1983436	230281	probe	173	71	1/ IVT	122.98	1.49	0.11	82.66	0.67	64
hCG1983445	196072	probe	15	21	1/ IVT	25260.2	86.19	20.6	293.09	0.04	64
hCG1983476	230538	probe	118	137	1/ IVT	1298.93	7.76	1.06	167.4	0.13	64
hCG1983808	230418	probe	157	129	1/ IVT	10501.7	35.91	9.27	292.45	0.05	64
hCG1983988	107645	probe	228	89	1/ IVT	517941	101.09	457.24	5123.62	0.04	64
hCG1984262.1	141544	probe	14	112	1/ IVT	10991.3	70.18	8.97	156.62	0.04	64
hCG1984300.3	102841	probe	68	55	1/ IVT	314304	107.24	256.36	2930.77	0.04	64
hCG1984476	205607	probe	28	153	1/ IVT	308775	113.31	251.85	2725.17	0.04	64
hCG1985512.1	105271	probe	16	31	1/ IVT	172200	102.89	140.46	1673.71	0.04	64
hCG1985618	229048	probe	130	81	1/ IVT	580.38	6.35	0.51	91.43	0.16	64
hCG1986612	175421	probe	72	77	1/ IVT	1.27477e+06	101	1039.77	12621.3	0.04	64
hCG1986612	201653	probe	190	112	1/ IVT	502137	129	443.29	3892.68	0.04	64
hCG1987191	130351	probe	62	62	1/ IVT	324828	107.84	264.95	3012.04	0.04	64
hCG1989035.1	207913	probe	176	99	1/ IVT	39613.6	101.77	34.97	389.24	0.04	64
hCG1989289	235825	probe	164	67	1/ IVT	106030	107.87	93.6	982.89	0.04	64
hCG1989596	111373	probe	161	43	1/ IVT	56981.7	91.04	50.3	625.92	0.04	64
hCG19897.3	113570	probe	38	157	1/ IVT	59724	84.51	48.71	706.69	0.04	64
hCG1989840	201212	probe	68	148	1/ IVT	923423	100.42	753.19	9195.34	0.04	64
hCG1989915	109337	probe	88	107	1/ IVT	4825.41	21.79	3.94	221.41	0.06	64
hCG1989946	229889	probe	35	88	1/ IVT	998.67	10.31	0.81	96.89	0.1	64
hCG1990006	130030	probe	76	139	1/ IVT	962098	104.67	784.74	9191.44	0.04	64
hCG1990539.2	188018	probe	6	107	1/ IVT	30826.6	87.86	25.14	350.85	0.04	64
hCG1990881.2	227085	probe	62	75	1/ IVT	2238.94	14.77	1.83	151.57	0.08	64
hCG1990963.1	129450	probe	188	64	1/ IVT	103181	123.97	91.09	832.28	0.04	64
hCG1991191	145867	probe	37	76	1/ IVT	2768.54	9.21	2.26	300.48	0.11	64
hCG1991196	223043	probe	166	129	1/ IVT	13661.2	48.28	12.06	282.93	0.04	64
hCG1991290.2	132539	probe	11	117	1/ IVT	348086	100.97	283.92	3447.58	0.04	64
hCG1991559	218083	probe	6	119	1/ IVT	33264.7	106.09	27.13	313.54	0.04	64
hCG1991829	141768	probe	170	47	1/ IVT	391848	120.01	345.92	3265.18	0.04	64
hCG1992246	280200	probe	105	74	1/ IVT	1549.47	13.76	1.26	112.61	0.08	64
hCG1993037.1	202710	probe	222	37	1/ IVT	553.7	4.43	0.49	125.04	0.23	64
hCG1993104	229057	probe	116	49	1/ IVT	1584.32	13.07	1.29	121.23	0.08	64
hCG19933.3	145718	probe	18	26	1/ IVT	1.73406e+06	108.75	1414.39	15946	0.04	64
hCG1993567.1	107640	probe	190	153	1/ IVT	107263	106.73	94.69	1005.01	0.04	64
hCG1993670	398283	probe	87	138	1/ IVT	2640.19	11.88	2.15	222.32	0.09	64
hCG1993742	199887	probe	30	158	1/ IVT	914657	111.77	746.04	8183.56	0.04	64
hCG19938.3	218154	probe	14	35	1/ IVT	121201	98.58	98.86	1229.46	0.04	64
hCG1993892	171508	probe	226	98	1/ IVT	43478.7	132.28	38.38	328.7	0.04	64
hCG1994018	130335	probe	4	109	1/ IVT	42133.8	97.85	34.37	430.6	0.04	64
hCG1994160.1	230767	probe	102	13	1/ IVT	739.43	3.92	0.6	188.43	0.26	64
hCG1994587	229885	probe	238	85	1/ IVT	74383.6	107.31	65.67	693.15	0.04	64
hCG1994888	210464	probe	177	67	1/ IVT	279920	122.25	247.11	2289.74	0.04	64
hCG1995126	509721	probe	111	16	1/ IVT	1014.22	6.1	0.83	166.21	0.17	64
hCG1995128.1	235986	probe	12	21	1/ IVT	230288	107.39	187.84	2144.39	0.04	64
hCG1995219	195495	probe	2	114	1/ IVT	400011	129.5	326.27	3088.99	0.04	64
hCG1995412	231696	probe	86	52	1/ IVT	581.2	4.86	0.47	119.5	0.21	64
hCG1995422.1	182096	probe	28	88	1/ IVT	26298.2	86.11	21.45	305.39	0.04	64
hCG19958.2	111253	probe	146	152	1/ IVT	2809.81	24.43	2.48	115.01	0.06	64
hCG1996340	174593	probe	12	107	1/ IVT	72250.9	100.36	58.93	719.92	0.04	64
hCG1996483	166502	probe	168	148	1/ IVT	729026	80.72	643.58	9031.69	0.04	64
hCG1996846	203700	probe	228	115	1/ IVT	683989	121.18	603.83	5644.6	0.04	64
hCG1997894.1	138755	probe	194	65	1/ IVT	522764	117.34	461.5	4455.18	0.04	64
hCG1998057	234426	probe	70	110	1/ IVT	1.17431e+06	92.98	957.83	12630	0.04	64
hCG1998251	154565	probe	72	157	1/ IVT	90428.2	104.8	73.76	862.83	0.04	64
hCG1998784.1	158191	probe	79	126	1/ IVT	147868	100.18	120.61	1475.95	0.04	64
hCG1998947	212992	probe	187	126	1/ IVT	968586	115.52	855.07	8384.56	0.04	64
hCG1998988	142747	probe	21	148	1/ IVT	172404	98.96	140.62	1742.22	0.04	64
hCG1999152	131413	probe	183	65	1/ IVT	120700	99.9	106.55	1208.24	0.04	64
hCG1999168	231772	probe	212	29	1/ IVT	8093.67	22.74	7.15	355.94	0.06	64
hCG1999854.1	202905	probe	235	118	1/ IVT	104171	128.33	91.96	811.74	0.04	64
hCG2000655	192902	probe	44	156	1/ IVT	126857	114.94	103.47	1103.67	0.04	64
hCG2001462	109967	probe	177	121	1/ IVT	563710	126.29	497.64	4463.75	0.04	64
hCG2002075	232642	probe	191	79	1/ IVT	81556.7	121.52	72	671.14	0.04	64
hCG2003508.1	134660	probe	8	32	1/ IVT	1.20996e+06	112.43	986.91	10761.9	0.04	64
hCG2003549	234007	probe	31	91	1/ IVT	800.44	3.61	0.65	221.47	0.28	64
hCG2003792	154562	probe	199	63	1/ IVT	165574	104.33	146.17	1587.05	0.04	64
hCG2003857	228879	probe	65	78	1/ IVT	151631	116.94	123.68	1296.65	0.04	64
hCG2003860.1	131946	probe	33	81	1/ IVT	932148	104	760.31	8962.67	0.04	64
hCG2003919.1	234622	probe	182	146	1/ IVT	441707	107.66	389.94	4102.98	0.04	64
hCG2004404	100826	probe	194	77	1/ IVT	373709	126.4	329.91	2956.63	0.04	64
hCG2005205	124085	probe	146	122	1/ IVT	2215.8	30.42	1.96	72.84	0.05	64
hCG2005294	234554	probe	236	108	1/ IVT	227801	95.46	201.1	2386.36	0.04	64
hCG2005453	101687	probe	188	68	1/ IVT	23113.9	94.1	20.4	245.62	0.04	64
hCG2005673	235868	probe	239	94	1/ IVT	1.58123e+06	87.15	1395.91	18144.7	0.04	64
hCG20060.2	179908	probe	61	66	1/ IVT	21326.6	79.26	17.4	269.07	0.04	64
hCG2006280	183524	probe	185	73	1/ IVT	10346.6	83.74	9.13	123.56	0.04	64
hCG2006634.1	234451	probe	70	108	1/ IVT	328559	111.8	267.99	2938.83	0.04	64
hCG2006972	105087	probe	43	85	1/ IVT	5437.84	28.09	4.44	193.59	0.05	64
hCG2007796	118522	probe	23	148	1/ IVT	382576	111.81	312.05	3421.77	0.04	64
hCG2008008	235614	probe	5	115	1/ IVT	29802.1	80.77	24.31	368.98	0.04	64
hCG2008025	235076	probe	231	15	1/ IVT	1172.35	13.28	1.03	88.3	0.08	64
hCG2008714	122747	probe	8	114	1/ IVT	76923.4	80.13	62.74	960	0.04	64
hCG2008737	235026	probe	162	129	1/ IVT	79682.9	105	70.34	758.92	0.04	64
hCG2008794	101441	probe	61	78	1/ IVT	353562	111.87	288.38	3160.34	0.04	64
hCG2009346	120574	probe	24	135	1/ IVT	591.23	4.98	0.48	118.63	0.2	64
hCG2010038	210073	probe	223	117	1/ IVT	49690.1	114.47	43.87	434.09	0.04	64
hCG2010044	191676	probe	71	150	1/ IVT	104064	92.32	84.88	1127.26	0.04	64
hCG2010191	145203	probe	11	101	1/ IVT	46166.8	99.25	37.66	465.16	0.04	64
hCG2010626	223550	probe	5	31	1/ IVT	43933.8	89.24	35.83	492.3	0.04	64
hCG2010805	188552	probe	27	70	1/ IVT	49010	111.07	39.98	441.27	0.04	64
hCG20110.3	141978	probe	198	64	1/ IVT	190177	122.43	167.89	1553.32	0.04	64
hCG2011133	235783	probe	174	128	1/ IVT	656996	114.61	580	5732.67	0.04	64
hCG2011555	103769	probe	41	137	1/ IVT	3979.49	17.82	3.25	223.29	0.07	64
hCG2011712	235893	probe	138	48	1/ IVT	1828.53	9.02	1.61	202.78	0.12	64
hCG2011952	212410	probe	173	88	1/ IVT	86846.9	102.44	76.67	847.8	0.04	64
hCG2012454	124735	probe	62	127	1/ IVT	68950.5	93.99	56.24	733.63	0.04	64
hCG2012960	104750	probe	118	78	1/ IVT	8197.09	71.89	6.69	114.02	0.04	64
hCG2013205	224715	probe	3	107	1/ IVT	593667	120.72	484.23	4917.74	0.04	64
hCG2013205	209738	probe	10	110	1/ IVT	355206	107.18	289.72	3314.1	0.04	64
hCG2014263	150776	probe	72	123	1/ IVT	46618.6	92.3	38.02	505.05	0.04	64
hCG2014421	234964	probe	16	38	1/ IVT	370596	103.89	302.28	3567.1	0.04	64
hCG201533.2	225035	probe	108	67	1/ IVT	854.36	14.1	0.7	60.58	0.08	64
hCG2015367	130678	probe	22	151	1/ IVT	50340	89.18	41.06	564.45	0.04	64
hCG2015882	191268	probe	25	66	1/ IVT	315085	105.68	257	2981.53	0.04	64
hCG2016016	204208	probe	77	152	1/ IVT	471669	103.15	384.72	4572.57	0.04	64
hCG2016483	132618	probe	30	70	1/ IVT	344031	118.54	280.61	2902.25	0.04	64
hCG2016509	102233	probe	234	17	1/ IVT	162787	120	143.71	1356.61	0.04	64
hCG2016594	229500	probe	107	55	1/ IVT	1361.1	10.51	1.11	129.55	0.1	64
hCG2017012	174242	probe	11	30	1/ IVT	98862.5	82.32	80.64	1201	0.04	64
hCG2017209	235782	probe	22	156	1/ IVT	334002	106.42	272.43	3138.49	0.04	64
hCG2017415	220966	probe	118	147	1/ IVT	747.29	10.15	0.61	73.63	0.1	64
hCG20180.3	150616	probe	204	135	1/ IVT	10229.5	49.4	9.03	207.09	0.04	64
hCG2018963	330221	probe	71	52	1/ IVT	416754	113.75	339.93	3663.71	0.04	64
hCG2019169	10698336	probe	24	71	1/ IVT	19770.7	85.47	16.13	231.31	0.04	64
hCG2019820.2	113737	probe	164	63	1/ IVT	101789	132.81	89.86	766.41	0.04	64
hCG2019931	219592	probe	197	108	1/ IVT	9094.63	47.07	8.03	193.23	0.04	64
hCG2020048	116145	probe	198	104	1/ IVT	215508	120.74	190.25	1784.92	0.04	64
hCG2020106	137556	probe	78	127	1/ IVT	41276	84.29	33.67	489.7	0.04	64
hCG2020517	169041	probe	23	19	1/ IVT	52871.5	111.29	43.12	475.08	0.04	64
hCG2021142	235581	probe	13	25	1/ IVT	828611	113.32	675.86	7311.89	0.04	64
hCG2021224	694601	probe	9	115	1/ IVT	1.09067e+06	114.01	889.61	9566.06	0.04	64
hCG2021224	543441	probe	185	102	1/ IVT	131901	118.1	116.44	1116.84	0.04	64
hCG2021833	174697	probe	109	142	1/ IVT	197.31	1.96	0.16	100.77	0.51	64
hCG2022352.1	178924	probe	12	33	1/ IVT	49870.9	86.81	40.68	574.51	0.04	64
hCG20224.2	136430	probe	174	41	1/ IVT	33896.1	107.75	29.92	314.58	0.04	64
hCG2022843.1	128091	probe	115	44	1/ IVT	21714.8	71.25	17.71	304.77	0.04	64
hCG2023003.1	227692	probe	70	132	1/ IVT	1.51658e+06	100.09	1237.01	15152.6	0.04	64
hCG2024525	171900	probe	138	88	1/ IVT	950.11	11.4	0.84	83.31	0.1	64
hCG2024635	166876	probe	74	44	1/ IVT	91711.8	91.22	74.81	1005.35	0.04	64
hCG2025429	234754	probe	152	124	1/ IVT	696.36	3.68	0.61	189.14	0.27	64
hCG2025745.1	224007	probe	113	147	1/ IVT	383.52	3.2	0.31	119.98	0.31	64
hCG2025821	194369	probe	167	105	1/ IVT	1679.99	11.01	1.48	152.62	0.1	64
hCG2025852	194890	probe	76	63	1/ IVT	91270.9	105.52	74.45	864.94	0.04	64
hCG2026261	127228	probe	73	145	1/ IVT	1.60025e+06	115.49	1305.25	13855.9	0.04	64
hCG2026991	234790	probe	166	58	1/ IVT	373552	122.73	329.77	3043.71	0.04	64
hCG2027957.1	219563	probe	228	85	1/ IVT	34008.7	114.35	30.02	297.42	0.04	64
hCG2027994	235091	probe	165	124	1/ IVT	1414.13	6.92	1.25	204.49	0.15	64
hCG2028158	660563	probe	14	113	1/ IVT	68146.6	104.39	55.58	652.84	0.04	64
hCG2028213	131436	probe	10	106	1/ IVT	71408.7	104.13	58.24	685.8	0.04	64
hCG2028781	204367	probe	24	95	1/ IVT	70856.3	112.29	57.79	631.02	0.04	64
hCG2028877	10704012	probe	54	154	1/ IVT	2418.02	19.95	1.97	121.2	0.06	64
hCG2029505	218609	probe	74	130	1/ IVT	28686.1	84.01	23.4	341.47	0.04	64
hCG2031039	135984	probe	33	94	1/ IVT	443418	106.88	361.68	4148.8	0.04	64
hCG2031612	230275	probe	108	49	1/ IVT	567.58	3.54	0.46	160.3	0.28	64
hCG2031852	148350	probe	68	118	1/ IVT	164153	95.16	133.89	1725.02	0.04	64
hCG2032518	191104	probe	168	53	1/ IVT	678885	120.68	599.32	5625.57	0.04	64
hCG2032518	135002	probe	196	156	1/ IVT	74222.4	105.17	65.52	705.74	0.04	64
hCG2032946	219627	probe	28	91	1/ IVT	1416.48	8.35	1.16	169.65	0.12	64
hCG2033271.2	208853	probe	68	64	1/ IVT	1.33004e+06	113.46	1084.86	11722.1	0.04	64
hCG2033276	157795	probe	4	112	1/ IVT	16640.5	78.74	13.57	211.34	0.04	64
hCG2033681	101145	probe	5	119	1/ IVT	93992.4	113.59	76.67	827.51	0.04	64
hCG20344.4	162516	probe	175	50	1/ IVT	110408	131.98	97.47	836.58	0.04	64
hCG20346.3	178503	probe	24	79	1/ IVT	31012.6	98.5	25.3	314.85	0.04	64
hCG2036504	230652	probe	166	42	1/ IVT	478.64	4.82	0.42	99.4	0.21	64
hCG2036531	138971	probe	213	153	1/ IVT	2749.38	28.38	2.43	96.89	0.05	64
hCG2036553	168412	probe	84	57	1/ IVT	3380.35	5.91	2.76	571.82	0.17	64
hCG2036589	120407	probe	65	147	1/ IVT	1410.64	7.86	1.15	179.41	0.13	64
hCG2036716	170823	probe	1	112	1/ IVT	223750	99.2	182.5	2255.62	0.04	64
hCG2036723.1	119390	probe	207	47	1/ IVT	178.72	1.38	0.16	129.12	0.72	64
hCG2036865	211567	probe	163	65	1/ IVT	1074.42	6.26	0.95	171.73	0.16	64
hCG2036872	177412	probe	9	30	1/ IVT	19290.2	82.27	15.73	234.47	0.04	64
hCG2037014	209485	probe	166	94	1/ IVT	70272.7	117.8	62.04	596.54	0.04	64
hCG2038417	133191	probe	76	59	1/ IVT	65061.1	94.59	53.07	687.82	0.04	64
hCG2038443	333596	probe	146	72	1/ IVT	803.85	7.24	0.71	111.02	0.14	64
hCG2038484	547402	probe	70	150	1/ IVT	820.09	3.44	0.67	238.51	0.29	64
hCG2038596	617954	probe	102	66	1/ IVT	12224.4	40.44	9.97	302.25	0.04	64
hCG2038619	714079	probe	103	34	1/ IVT	1276.79	10.13	1.04	126	0.1	64
hCG2038627	359759	probe	84	51	1/ IVT	166.97	1.44	0.14	116.13	0.7	64
hCG2038677	703288	probe	68	49	1/ IVT	70567.6	98.9	57.56	713.55	0.04	64
hCG2038718	706667	probe	34	38	1/ IVT	1358.77	13.26	1.11	102.45	0.08	64
hCG2038786	686182	probe	232	5	1/ IVT	2390.01	6.8	2.11	351.65	0.15	64
hCG2038792	388974	probe	236	116	1/ IVT	1.41491e+06	95.53	1249.08	14811.1	0.04	64
hCG2038857	693768	probe	230	91	1/ IVT	1009.78	7.54	0.89	133.99	0.14	64
hCG2038894	703730	probe	146	47	1/ IVT	463.02	3.99	0.41	116.01	0.25	64
hCG2039062	197165	probe	171	43	1/ IVT	18829	112.9	16.62	166.77	0.04	64
hCG2039395	192518	probe	26	79	1/ IVT	20928.4	79.69	17.07	262.63	0.04	64
hCG2039426.1	173749	probe	93	118	1/ IVT	4900.98	10.65	4	460.01	0.1	64
hCG2039666	216707	probe	26	86	1/ IVT	27991.3	79.78	22.83	350.86	0.04	64
hCG2039671	147922	probe	234	107	1/ IVT	16064.8	45.58	14.18	352.43	0.04	64
hCG2040001	199830	probe	70	66	1/ IVT	270637	110.06	220.75	2458.96	0.04	64
hCG2040021	670611	probe	162	53	1/ IVT	32938.2	90	29.08	365.99	0.04	64
hCG2040165	192476	probe	24	156	1/ IVT	133474	93.32	108.87	1430.34	0.04	64
hCG2040177	214091	probe	236	88	1/ IVT	1.16648e+06	106.89	1029.77	10912.9	0.04	64
hCG2040203	102617	probe	70	123	1/ IVT	808575	110.96	659.52	7287.04	0.04	64
hCG2040268	109106	probe	185	78	1/ IVT	460532	107.52	406.56	4283.24	0.04	64
hCG2040357	156725	probe	170	61	1/ IVT	438.15	4.38	0.39	99.96	0.23	64
hCG20405.4	119571	probe	31	78	1/ IVT	978.9	6.47	0.8	151.38	0.16	64
hCG2040596	190600	probe	49	90	1/ IVT	939.79	5.46	0.77	172.07	0.19	64
hCG2040685	147449	probe	130	94	1/ IVT	6344.74	8.04	5.6	789.26	0.13	64
hCG2040692	135804	probe	139	115	1/ IVT	972.31	4.7	0.86	206.69	0.22	64
hCG2040758.1	135708	probe	2	39	1/ IVT	195610	101.83	159.55	1920.9	0.04	64
hCG2040761	205052	probe	96	56	1/ IVT	2182.43	12.69	1.78	171.99	0.09	64
hCG2040787	191038	probe	29	28	1/ IVT	2543.76	13.33	2.07	190.82	0.08	64
hCG2040940	104831	probe	50	144	1/ IVT	3692.22	9.05	3.01	408.17	0.12	64
hCG2041113.1	215901	probe	22	95	1/ IVT	166341	107.38	135.68	1549.1	0.04	64
hCG2041220	206878	probe	189	42	1/ IVT	105930	92.69	93.51	1142.81	0.04	64
hCG2041260	142318	probe	81	64	1/ IVT	646.4	3.11	0.53	207.72	0.32	64
hCG2041285	201456	probe	67	125	1/ IVT	38056.6	93.59	31.04	406.62	0.04	64
hCG2041368	226134	probe	226	53	1/ IVT	1723.98	27.58	1.52	62.51	0.05	64
hCG2041541	167177	probe	189	37	1/ IVT	2361.6	16.34	2.08	144.53	0.07	64
hCG2041578	124880	probe	28	8	1/ IVT	209553	112.8	170.92	1857.78	0.04	64
hCG2041642	146296	probe	98	44	1/ IVT	540.24	2.57	0.44	210.07	0.39	64
hCG20417.3	224678	probe	194	149	1/ IVT	76891	112.09	67.88	685.98	0.04	64
hCG2041727	161523	probe	183	75	1/ IVT	241.73	3.22	0.21	74.96	0.31	64
hCG2041771	209668	probe	190	123	1/ IVT	1041.33	7.7	0.92	135.19	0.14	64
hCG2041930	197151	probe	135	93	1/ IVT	31559.7	11.33	27.86	2785.94	0.1	64
hCG2041962	201078	probe	183	123	1/ IVT	652.36	5.5	0.58	118.58	0.19	64
hCG2042071.1	174972	probe	65	142	1/ IVT	475408	94.04	387.77	5055.52	0.04	64
hCG2042116	198486	probe	70	148	1/ IVT	383286	102.33	312.63	3745.58	0.04	64
hCG2042491	108042	probe	145	122	1/ IVT	1099.54	6.24	0.97	176.07	0.16	64
hCG2042610.1	219148	probe	5	35	1/ IVT	23987.9	100.18	19.57	239.46	0.04	64
hCG2042798	195161	probe	79	42	1/ IVT	531973	95.95	433.91	5544.4	0.04	64
hCG2042914	173734	probe	69	19	1/ IVT	1058.51	14.78	0.86	71.64	0.08	64
hCG2043022	144446	probe	77	78	1/ IVT	123348	109.13	100.61	1130.3	0.04	64
hCG2043046	137209	probe	230	104	1/ IVT	33517.2	118.93	29.59	281.83	0.04	64
hCG2043063	141522	probe	5	53	1/ IVT	8100.24	32.27	6.61	251.03	0.05	64
hCG2043426	119268	probe	66	130	1/ IVT	47479.1	82.95	38.73	572.35	0.04	64
hCG2043487	135209	probe	171	98	1/ IVT	869712	107.9	767.78	8060.14	0.04	64
hCG2043510	190731	probe	61	137	1/ IVT	590941	93.04	482	6351.48	0.04	64
hCG2043513	188451	probe	65	119	1/ IVT	482886	121.43	393.87	3976.67	0.04	64
hCG2043528	208626	probe	36	144	1/ IVT	1.35984e+06	104.62	1109.16	12997.9	0.04	64
hCG2043535	508237	probe	170	127	1/ IVT	181392	130.66	160.13	1388.27	0.04	64
hCG2043580	707754	probe	151	150	1/ IVT	3100.35	8.22	2.74	377.18	0.13	64
hCG2044002	219524	probe	239	38	1/ IVT	723.21	4.04	0.64	178.93	0.25	64
hCG20447.3	140439	probe	194	110	1/ IVT	54973.3	112.5	48.53	488.66	0.04	64
hCG20484.4	193213	probe	218	72	1/ IVT	501.27	4.02	0.44	124.59	0.25	64
hCG20586.2	151221	probe	17	38	1/ IVT	62603.9	91.09	51.06	687.31	0.04	64
hCG20677.2	207491	probe	10	111	1/ IVT	227972	106.01	185.95	2150.54	0.04	64
hCG20740.4	224027	probe	129	108	1/ IVT	1765.64	11.9	1.56	148.36	0.09	64
hCG20743.3	208324	probe	78	123	1/ IVT	1.4402e+06	111.29	1174.71	12941.3	0.04	64
hCG20819.2	163681	probe	74	66	1/ IVT	156369	112.2	127.54	1393.7	0.04	64
hCG20884.2	134434	probe	17	39	1/ IVT	112852	102.57	92.05	1100.28	0.04	64
hCG21047.4	161539	probe	48	129	1/ IVT	1263.52	4.76	1.03	265.24	0.21	64
hCG21224.3	217268	probe	5	130	1/ IVT	161274	97.15	131.54	1660.07	0.04	64
hCG21239.2	110926	probe	1	108	1/ IVT	63956.2	78.89	52.17	810.71	0.04	64
hCG21380.4	103810	probe	184	31	1/ IVT	26350.6	106.16	23.26	248.22	0.04	64
hCG21438.2	210342	probe	11	116	1/ IVT	198308	101.93	161.75	1945.44	0.04	64
hCG21456.3	149860	probe	101	18	1/ IVT	708.8	7.68	0.58	92.24	0.13	64
hCG21590.3	136723	probe	136	109	1/ IVT	1865.76	12.28	1.65	151.97	0.09	64
hCG21730.2	162818	probe	52	75	1/ IVT	73612.7	89.53	60.04	822.21	0.04	64
hCG21749.3	200401	probe	67	155	1/ IVT	557292	101.1	454.56	5512.54	0.04	64
hCG21774.2	103754	probe	72	95	1/ IVT	599.61	3.65	0.49	164.37	0.28	64
hCG21776.4	105602	probe	70	35	1/ IVT	386833	129.52	315.52	2986.7	0.04	64
hCG21870.2	203398	probe	4	30	1/ IVT	52986.7	98.57	43.22	537.56	0.04	64
hCG21875.3	102723	probe	63	75	1/ IVT	47608	101.53	38.83	468.89	0.04	64
hCG21895.3	162223	probe	161	129	1/ IVT	6568	41.65	5.8	157.7	0.05	64
hCG21965.3	115249	probe	4	104	1/ IVT	99344.5	115.79	81.03	857.94	0.04	64
hCG22004.2	113650	probe	63	67	1/ IVT	721837	109.39	588.77	6598.75	0.04	64
hCG22226.3	139228	probe	34	93	1/ IVT	116135	109.38	94.73	1061.74	0.04	64
hCG22255.3	158664	probe	30	142	1/ IVT	1607.6	13.96	1.31	115.17	0.08	64
hCG22398.1	124613	probe	184	67	1/ IVT	694335	134.5	612.96	5162.37	0.04	64
hCG22625.3	150607	probe	5	112	1/ IVT	49701.7	96.15	40.54	516.9	0.04	64
hCG22638.3	159532	probe	199	66	1/ IVT	23100	86.61	20.39	266.71	0.04	64
hCG22683.3	114895	probe	75	43	1/ IVT	60766.5	94.83	49.56	640.79	0.04	64
hCG22836.3	124154	probe	43	68	1/ IVT	51213.1	106.04	41.77	482.98	0.04	64
hCG22856.3	204620	probe	30	86	1/ IVT	41266.1	88.29	33.66	467.37	0.04	64
hCG22888.3	158562	probe	211	5	1/ IVT	597.5	1.76	0.53	340.38	0.57	64
hCG23176.4	215195	probe	45	67	1/ IVT	62462.4	105.76	50.95	590.62	0.04	64
hCG23184.2	189140	probe	223	114	1/ IVT	497248	106.62	438.97	4663.72	0.04	64
hCG23190.2	197522	probe	174	51	1/ IVT	14662.8	86.01	12.94	170.49	0.04	64
hCG23241.3	221307	probe	76	69	1/ IVT	266850	118.24	217.66	2256.8	0.04	64
hCG23252.3	147046	probe	18	116	1/ IVT	252357	104.89	205.84	2405.8	0.04	64
hCG23263.3	172519	probe	154	133	1/ IVT	4307.82	24.01	3.8	179.44	0.06	64
hCG23318.2	105380	probe	205	103	1/ IVT	9648.63	51.82	8.52	186.19	0.04	64
hCG23334.3	184125	probe	178	127	1/ IVT	76539.4	122.52	67.57	624.72	0.04	64
hCG23347.2	114304	probe	70	82	1/ IVT	10159.6	42.22	8.29	240.65	0.04	64
hCG23538.4	147923	probe	189	75	1/ IVT	118440	119.77	104.56	988.91	0.04	64
hCG23560.3	194318	probe	169	130	1/ IVT	31051.4	121.49	27.41	255.59	0.04	64
hCG23567.2	203916	probe	166	67	1/ IVT	73090.9	114.18	64.52	640.12	0.04	64
hCG23671.3	158210	probe	37	88	1/ IVT	45072.2	83.42	36.76	540.27	0.04	64
hCG23774.4	139242	probe	65	121	1/ IVT	86466.2	101.32	70.53	853.38	0.04	64
hCG23812.3	213132	probe	102	149	1/ IVT	445.52	4.95	0.36	90.07	0.21	64
hCG23984.3	177089	probe	74	55	1/ IVT	84780	104.94	69.15	807.86	0.04	64
hCG24060.3	108974	probe	29	98	1/ IVT	84313.8	95.62	68.77	881.73	0.04	64
hCG24162.3	183815	probe	67	139	1/ IVT	50474.5	87.08	41.17	579.66	0.04	64
hCG24407.3	188686	probe	14	101	1/ IVT	79087.2	114.31	64.51	691.88	0.04	64
hCG24446.2	160104	probe	157	123	1/ IVT	1353.53	8.03	1.19	168.52	0.13	64
hCG24773.3	102788	probe	30	62	1/ IVT	49038.6	82.58	40	593.82	0.04	64
hCG24980.2	157084	probe	34	91	1/ IVT	54603.9	98.61	44.54	553.73	0.04	64
hCG24999.3	205890	probe	185	39	1/ IVT	396349	120.21	349.9	3297.18	0.04	64
hCG25018.3	234098	probe	26	5	1/ IVT	201313	109.38	164.2	1840.46	0.04	64
hCG25023.3	174492	probe	227	109	1/ IVT	37748.3	105.91	33.32	356.42	0.04	64
hCG25090.3	190673	probe	231	115	1/ IVT	90496.5	109.15	79.89	829.13	0.04	64
hCG25143.3	121618	probe	63	153	1/ IVT	20145.6	43.44	16.43	463.8	0.04	64
hCG25157.3	188457	probe	45	111	1/ IVT	1268.69	8.03	1.03	157.95	0.13	64
hCG25199.2	157638	probe	194	79	1/ IVT	66330	104.68	58.56	633.64	0.04	64
hCG25441.3	151072	probe	9	39	1/ IVT	43028.4	89.3	35.1	481.86	0.04	64
hCG25502.3	207683	probe	176	19	1/ IVT	366968	119.88	323.96	3061.15	0.04	64
hCG25596.3	159949	probe	165	123	1/ IVT	43237.3	106.85	38.17	404.66	0.04	64
hCG25605.3	212759	probe	15	103	1/ IVT	284384	118.93	231.96	2391.2	0.04	64
hCG25676.2	167173	probe	129	105	1/ IVT	39542.7	92.57	34.91	427.18	0.04	64
hCG26614.2	173072	probe	10	112	1/ IVT	26137.3	85.39	21.32	306.1	0.04	64
hCG26798.3	154223	probe	17	118	1/ IVT	28545.5	83.76	23.28	340.8	0.04	64
hCG26831.3	138608	probe	170	133	1/ IVT	350421	134.2	309.35	2611.28	0.04	64
hCG26963.2	194940	probe	217	12	1/ IVT	3164.62	13.36	2.79	236.95	0.08	64
hCG27254.4	111556	probe	38	154	1/ IVT	59082.5	94.71	48.19	623.84	0.04	64
hCG27413.2	129038	probe	211	129	1/ IVT	107.48	1.49	0.09	72.3	0.67	64
hCG27475.3	152463	probe	81	143	1/ IVT	390.66	2.29	0.32	170.47	0.44	64
hCG27487.3	157597	probe	185	68	1/ IVT	409855	111.92	361.82	3662.18	0.04	64
hCG27520.2	127718	probe	88	8	1/ IVT	5635.96	24.13	4.6	233.59	0.05	64
hCG27561.4	135111	probe	39	147	1/ IVT	48615.3	96.63	39.65	503.12	0.04	64
hCG27616.2	132241	probe	203	39	1/ IVT	1477.8	9.22	1.3	160.26	0.12	64
hCG27635.2	137763	probe	239	18	1/ IVT	19878.4	35.5	17.55	559.93	0.05	64
hCG27750.3	175000	probe	3	11	1/ IVT	72351.8	94.52	59.01	765.49	0.04	64
hCG27767.2	130088	probe	10	27	1/ IVT	412905	105.11	336.79	3928.44	0.04	64
hCG27834.3	168572	probe	45	78	1/ IVT	457.11	6.44	0.37	71.02	0.16	64
hCG27852.2	170428	probe	42	128	1/ IVT	1843.68	11.92	1.5	154.65	0.09	64
hCG27935.3	124164	probe	74	73	1/ IVT	58550	102.89	47.76	569.06	0.04	64
hCG28065.2	151422	probe	187	116	1/ IVT	156500	116.02	138.16	1348.96	0.04	64
hCG28105.3	150174	probe	198	45	1/ IVT	746.86	6.42	0.66	116.36	0.16	64
hCG28164.3	183204	probe	141	18	1/ IVT	20907.9	50.66	18.46	412.71	0.04	64
hCG28165.3	129897	probe	76	129	1/ IVT	29030.3	85.15	23.68	340.94	0.04	64
hCG28255.3	102596	probe	233	14	1/ IVT	154175	128.74	136.11	1197.57	0.04	64
hCG28706.3	193960	probe	34	62	1/ IVT	110958	103.72	90.5	1069.73	0.04	64
hCG28715.3	156950	probe	23	151	1/ IVT	43868.7	105.23	35.78	416.9	0.04	64
hCG28806.3	144477	probe	196	145	1/ IVT	61556.9	111.38	54.34	552.65	0.04	64
hCG28823.2	174137	probe	32	73	1/ IVT	109946	112.89	89.68	973.94	0.04	64
hCG29141.2	134692	probe	38	6	1/ IVT	225120	101.56	183.62	2216.62	0.04	64
hCG29512.4	174201	probe	8	22	1/ IVT	10251.9	66	8.36	155.33	0.04	64
hCG29638.3	163649	probe	194	51	1/ IVT	72887.6	102.55	64.35	710.72	0.04	64
hCG29657.3	190581	probe	222	90	1/ IVT	34431.2	129.26	30.4	266.36	0.04	64
hCG29975.2	155029	probe	32	16	1/ IVT	6227.03	38.57	5.08	161.43	0.04	64
hCG30752.3	151722	probe	189	51	1/ IVT	272814	105.16	240.84	2594.16	0.04	64
hCG31823.3	227096	probe	14	115	1/ IVT	13746.8	86.56	11.21	158.81	0.04	64
hCG31851.2	154789	probe	69	71	1/ IVT	9267.4	73.82	7.56	125.54	0.04	64
hCG31913.3	138481	probe	164	53	1/ IVT	199804	97.82	176.39	2042.58	0.04	64
hCG32172.3	117132	probe	67	42	1/ IVT	112425	108.61	91.7	1035.16	0.04	64
hCG32179.2	192193	probe	178	62	1/ IVT	5383.36	30.61	4.75	175.86	0.05	64
hCG32194.3	105010	probe	227	88	1/ IVT	21420.2	87.33	18.91	245.27	0.04	64
hCG32232.3	139356	probe	31	99	1/ IVT	13037	72.63	10.63	179.49	0.04	64
hCG32326.4	203632	probe	5	37	1/ IVT	190050	122.66	155.02	1549.44	0.04	64
hCG32444.3	162251	probe	36	156	1/ IVT	64357	96.39	52.49	667.7	0.04	64
hCG32539.2	137383	probe	67	14	1/ IVT	1777.35	14.43	1.45	123.19	0.08	64
hCG32577.2	205205	probe	72	55	1/ IVT	45145.8	95.94	36.82	470.54	0.04	64
hCG32695.3	181754	probe	173	54	1/ IVT	94814.4	135.75	83.7	698.45	0.04	64
hCG32790.2	184819	probe	197	68	1/ IVT	20237.5	95.74	17.87	211.37	0.04	64
hCG32868.3	120250	probe	162	33	1/ IVT	1014.91	6.92	0.9	146.59	0.15	64
hCG33014.2	183235	probe	161	89	1/ IVT	253.49	4.04	0.22	62.73	0.25	64
hCG33029.3	115926	probe	72	104	1/ IVT	63118.7	101.97	51.48	618.96	0.04	64
hCG33042.2	111306	probe	17	27	1/ IVT	262452	99.08	214.07	2648.91	0.04	64
hCG33191.5	190870	probe	12	115	1/ IVT	51009.7	89.38	41.61	570.71	0.04	64
hCG33203.3	137521	probe	138	36	1/ IVT	76746.7	103.31	67.75	742.87	0.04	64
hCG33256.5	226859	probe	84	153	1/ IVT	868.26	2.75	0.71	315.52	0.37	64
hCG33379.2	192749	probe	65	123	1/ IVT	10718.9	83.11	8.74	128.97	0.04	64
hCG33396.2	148221	probe	6	71	1/ IVT	53737.2	115.45	43.83	465.46	0.04	64
hCG33490.3	112058	probe	107	81	1/ IVT	2648.46	21.18	2.16	125.06	0.06	64
hCG34124.3	194114	probe	186	71	1/ IVT	34688.9	97.45	30.62	355.98	0.04	64
hCG34333.2	184220	probe	73	149	1/ IVT	140561	95.78	114.65	1467.61	0.04	64
hCG34336.3	140721	probe	10	102	1/ IVT	23329.3	83.12	19.03	280.67	0.04	64
hCG36820.3	195645	probe	67	68	1/ IVT	250397	118.85	204.24	2106.9	0.04	64
hCG36827.3	132592	probe	24	149	1/ IVT	157826	124.21	128.73	1270.69	0.04	64
hCG36936.3	193122	probe	205	21	1/ IVT	5334.34	34.37	4.71	155.22	0.05	64
hCG37029.3	194024	probe	67	136	1/ IVT	19651.8	71.71	16.03	274.06	0.04	64
hCG37324.2	208456	probe	174	99	1/ IVT	57731.8	99.37	50.97	580.98	0.04	64
hCG37351.3	138685	probe	188	70	1/ IVT	46148.5	117.2	40.74	393.74	0.04	64
hCG37417.2	147109	probe	33	141	1/ IVT	141524	106.18	115.43	1332.87	0.04	64
hCG37466.3	180726	probe	185	84	1/ IVT	623.09	5.59	0.55	111.46	0.18	64
hCG37604.2	175469	probe	235	91	1/ IVT	29359.5	83.09	25.92	353.34	0.04	64
hCG37642.3	145263	probe	126	102	1/ IVT	23027.2	81.6	20.33	282.18	0.04	64
hCG37648.4	159180	probe	183	150	1/ IVT	5103.91	62.51	4.51	81.64	0.04	64
hCG37652.3	168872	probe	68	138	1/ IVT	65935.8	91.5	53.78	720.6	0.04	64
hCG37772.3	191355	probe	66	79	1/ IVT	29610.1	91.67	24.15	323.02	0.04	64
hCG37825.4	541722	probe	71	117	1/ IVT	427370	126.47	348.59	3379.26	0.04	64
hCG37855.2	117582	probe	22	9	1/ IVT	120301	103.16	98.12	1166.17	0.04	64
hCG37869.3	198250	probe	192	53	1/ IVT	424.07	3.85	0.37	110.04	0.26	64
hCG37879.2	135972	probe	157	96	1/ IVT	4816.65	14.72	4.25	327.11	0.08	64
hCG38016.2	201179	probe	197	144	1/ IVT	81784.1	99.72	72.2	820.14	0.04	64
hCG38149.3	170545	probe	123	26	1/ IVT	123571	106.35	109.09	1161.94	0.04	64
hCG38239.3	212448	probe	128	109	1/ IVT	1762.35	14	1.56	125.89	0.08	64
hCG38346.2	109856	probe	1	30	1/ IVT	101313	95.48	82.64	1061.12	0.04	64
hCG38365.3	104353	probe	197	153	1/ IVT	105.6	2.34	0.09	45.04	0.43	64
hCG38378.3	199360	probe	193	134	1/ IVT	71880.9	93.18	63.46	771.43	0.04	64
hCG38388.3	204948	probe	195	114	1/ IVT	363882	122.75	321.23	2964.37	0.04	64
hCG38403.3	232770	probe	66	64	1/ IVT	885.91	8.48	0.72	104.43	0.12	64
hCG38538.3	186825	probe	4	23	1/ IVT	208281	119.27	169.89	1746.3	0.04	64
hCG38685.2	139052	probe	193	74	1/ IVT	46712.7	106.34	41.24	439.27	0.04	64
hCG38787.2	154909	probe	182	67	1/ IVT	1706.94	14.83	1.51	115.13	0.08	64
hCG38795.3	109841	probe	165	61	1/ IVT	73238.3	137.07	64.65	534.3	0.04	64
hCG38881.3	162138	probe	10	101	1/ IVT	76131.1	100.48	62.1	757.68	0.04	64
hCG38907.3	204473	probe	236	114	1/ IVT	124821	79.73	110.19	1565.58	0.04	64
hCG39038.3	185322	probe	26	18	1/ IVT	100078	116.18	81.63	861.41	0.04	64
hCG39062.2	192289	probe	162	56	1/ IVT	47475.7	103.44	41.91	458.97	0.04	64
hCG39068.4	231173	probe	181	71	1/ IVT	62883.6	97.22	55.51	646.81	0.04	64
hCG39195.3	124377	probe	59	145	1/ IVT	69089.6	101.12	56.35	683.21	0.04	64
hCG39222.3	175376	probe	2	119	1/ IVT	153686	106.59	125.35	1441.91	0.04	64
hCG39240.3	236102	probe	194	106	1/ IVT	1.39401e+06	130.03	1230.63	10720.7	0.04	64
hCG39263.3	142323	probe	65	139	1/ IVT	20476.7	82.78	16.7	247.36	0.04	64
hCG39301.2	133986	probe	36	67	1/ IVT	23294.6	88.26	19	263.94	0.04	64
hCG39381.3	177026	probe	234	114	1/ IVT	69433.6	92.56	61.3	750.16	0.04	64
hCG39383.3	146229	probe	65	126	1/ IVT	85913.5	97.26	70.08	883.32	0.04	64
hCG39444.3	183261	probe	137	71	1/ IVT	609.49	1.02	0.54	597.27	0.98	64
hCG39606.3	150087	probe	26	151	1/ IVT	62793.8	105.47	51.22	595.36	0.04	64
hCG39613.3	100736	probe	129	106	1/ IVT	9803.56	47	8.65	208.57	0.04	64
hCG39838.2	221463	probe	139	112	1/ IVT	312721	112.1	276.07	2789.58	0.04	64
hCG39857.5	125572	probe	188	17	1/ IVT	787.07	7.77	0.69	101.33	0.13	64
hCG39882.2	154245	probe	238	39	1/ IVT	76631.1	91.35	67.65	838.84	0.04	64
hCG39985.3	141258	probe	70	69	1/ IVT	227136	122.16	185.26	1859.3	0.04	64
hCG40106.3	201766	probe	14	39	1/ IVT	102229	92.46	83.38	1105.6	0.04	64
hCG401141.3	216353	probe	197	48	1/ IVT	10550	76.71	9.31	137.53	0.04	64
hCG401201.3	101711	probe	225	84	1/ IVT	38964.8	108.89	34.4	357.85	0.04	64
hCG401241.2	207719	probe	196	70	1/ IVT	122998	108.47	108.58	1133.95	0.04	64
hCG401287.2	201736	probe	198	148	1/ IVT	338485	99.22	298.81	3411.41	0.04	64
hCG40161.3	224241	probe	145	133	1/ IVT	1052.11	8.26	0.93	127.43	0.13	64
hCG40169.3	138185	probe	233	119	1/ IVT	177030	135.99	156.28	1301.75	0.04	64
hCG40224.3	177453	probe	184	74	1/ IVT	3145.03	25.47	2.78	123.49	0.05	64
hCG40371.2	161858	probe	22	88	1/ IVT	578.66	3.1	0.47	186.46	0.32	64
hCG40603.2	122433	probe	36	142	1/ IVT	86328.6	112.08	70.41	770.25	0.04	64
hCG40753.3	131901	probe	65	48	1/ IVT	1.44116e+06	107.17	1175.49	13446.8	0.04	64
hCG40787.3	115882	probe	76	41	1/ IVT	204879	119.28	167.11	1717.69	0.04	64
hCG40929.2	111700	probe	22	155	1/ IVT	78269	92.54	63.84	845.82	0.04	64
hCG41093.3	173838	probe	25	75	1/ IVT	352640	111.02	287.63	3176.26	0.04	64
hCG41209.2	107710	probe	13	105	1/ IVT	126711	116.65	103.35	1086.22	0.04	64
hCG41258.2	112415	probe	27	94	1/ IVT	134120	121.56	109.4	1103.28	0.04	64
hCG41291.3	101611	probe	26	87	1/ IVT	27183.9	108.55	22.17	250.42	0.04	64
hCG41336.2	131972	probe	17	58	1/ IVT	8715.21	42.74	7.11	203.89	0.04	64
hCG41413.3	172324	probe	75	114	1/ IVT	133093	98.05	108.56	1357.33	0.04	64
hCG41742.3	105701	probe	136	113	1/ IVT	65111.5	59.94	57.48	1086.28	0.04	64
hCG41768.3	158904	probe	223	107	1/ IVT	1.14352e+06	123.13	1009.5	9286.96	0.04	64
hCG41796.3	118983	probe	234	103	1/ IVT	65344	103.18	57.69	633.33	0.04	64
hCG41830.3	180211	probe	49	62	1/ IVT	53265.9	102	43.45	522.21	0.04	64
hCG41983.3	178639	probe	67	44	1/ IVT	34136.1	107.17	27.84	318.53	0.04	64
hCG42016.4	158269	probe	167	63	1/ IVT	46479.8	107.98	41.03	430.44	0.04	64
hCG42037.3	208728	probe	175	124	1/ IVT	70569.1	114.08	62.3	618.6	0.04	64
hCG42246.2	216187	probe	206	19	1/ IVT	377.39	5.23	0.33	72.15	0.19	64
hCG42593.2	133074	probe	7	103	1/ IVT	11417.2	71.32	9.31	160.09	0.04	64
hCG42594.4	134260	probe	4	116	1/ IVT	16635.3	88.48	13.57	188.01	0.04	64
hCG43354.4	180184	probe	138	24	1/ IVT	487.66	2.54	0.43	192.22	0.4	64
hCG43696.3	169718	probe	193	148	1/ IVT	83599.1	100.6	73.8	831	0.04	64
hCG43725.3	135704	probe	165	70	1/ IVT	143677	111.03	126.84	1294.05	0.04	64
hCG93868.3	153718	probe	186	77	1/ IVT	75622.7	119.41	66.76	633.31	0.04	64
hCG96287.2	199490	probe	128	105	1/ IVT	85315.5	121.12	75.32	704.4	0.04	64
hCG96541.4	187115	probe	4	25	1/ IVT	17352.5	104.95	14.15	165.34	0.04	64
R26_hCT1653698.2	112953	probe	225	28	1/ IVT	380854	118.88	336.22	3203.56	0.04	64
R26_hCT1786651.1	145286	probe	77	132	1/ IVT	22841.6	76.8	18.63	297.43	0.04	64
R26_hCT1832364	131326	probe	79	54	1/ IVT	899916	98.22	734.02	9162	0.04	64
hCG15683.3	200201	probe	31	67	1/ IVT	1.51903e+06	92.76	1239	16375.6	0.04	4
hCG1639870.3	236666	probe	64	69	1/ IVT	1.31083e+06	83.43	1069.18	15712.5	0.04	4
hCG1640167.4	169951	probe	88	144	1/ IVT	1.50172e+06	33.12	1224.88	45339.3	0.05	4
hCG1640167.4	162103	probe	212	94	1/ IVT	1.96839e+06	61.45	1737.69	32030.1	0.04	4
hCG1640289.5	181598	probe	153	147	1/ IVT	2.1426e+06	78.37	1891.49	27338.5	0.04	4
hCG1640978.4	210362	probe	66	113	1/ IVT	1.46139e+06	96.26	1191.99	15181.8	0.04	4
hCG1641180.3	184452	probe	137	43	1/ IVT	1.85669e+06	62.2	1639.09	29849.5	0.04	4
hCG1643032.1	154414	probe	41	34	1/ IVT	1.42905e+06	48.01	1165.61	29767.5	0.04	4
hCG1643032.1	214614	probe	130	71	1/ IVT	1.28526e+06	79.73	1134.63	16120	0.04	4
hCG1656845.3	231786	probe	224	19	1/ IVT	1.31898e+06	111.13	1164.4	11868.4	0.04	4
hCG16802.3	236670	probe	164	106	1/ IVT	1.20683e+06	55.83	1065.39	21617.7	0.04	4
hCG1739399.3	139758	probe	166	44	1/ IVT	1.60767e+06	101.12	1419.25	15899.4	0.04	4
hCG1743714.2	167373	probe	188	90	1/ IVT	1.79572e+06	41.6	1585.26	43169.9	0.05	4
hCG1747792.2	186570	probe	3	71	1/ IVT	1.53621e+06	79.21	1253.01	19393.5	0.04	4
hCG1747792.2	695829	probe	91	81	1/ IVT	1.44639e+06	37.3	1179.76	38777.2	0.04	4
hCG1784266.2	132733	probe	128	155	1/ IVT	1.77323e+06	69.94	1565.41	25352.2	0.04	4
hCG1820938.2	159501	probe	228	98	1/ IVT	1.3435e+06	95.3	1186.04	14098	0.04	4
hCG18222.3	195036	probe	188	7	1/ IVT	1.35995e+06	31.2	1200.56	43590.9	0.05	4
hCG1983988	121257	probe	128	84	1/ IVT	1.73153e+06	47.59	1528.6	36385.8	0.04	4
hCG1985370	217279	probe	5	95	1/ IVT	1.65299e+06	100.33	1348.27	16476.3	0.04	4
hCG2001000.1	187762	probe	150	27	1/ IVT	1.68357e+06	50.52	1486.25	33321.6	0.04	4
hCG2001832	103097	probe	8	112	1/ IVT	1.4114e+06	99.72	1151.21	14153.3	0.04	4
hCG2001832	137680	probe	30	131	1/ IVT	1.54962e+06	84.81	1263.95	18271.4	0.04	4
hCG2016250	175988	probe	28	126	1/ IVT	1.73853e+06	86.46	1418.04	20107.1	0.04	4
hCG2016250	156640	probe	188	46	1/ IVT	1.54858e+06	107.89	1367.09	14353.1	0.04	4
hCG2020044	163373	probe	173	148	1/ IVT	1.86362e+06	102.67	1645.21	18151.8	0.04	4
hCG2020044	213480	probe	237	136	1/ IVT	1.51472e+06	71.15	1337.19	21289.5	0.04	4
hCG2033271.2	100771	probe	133	126	1/ IVT	1.49959e+06	50.98	1323.84	29418.2	0.04	4
hCG2040231	201206	probe	195	7	1/ IVT	1.92629e+06	31.16	1700.53	61829.3	0.05	4
hCG2043433	235551	probe	44	65	1/ IVT	1.31427e+06	76.49	1071.99	17182.2	0.04	4
hCG2043491	127797	probe	230	125	1/ IVT	1.8577e+06	62.69	1639.98	29632.1	0.04	4
hCG22610.2	121094	probe	228	79	1/ IVT	1.19636e+06	56.57	1056.15	21147	0.04	4
hCG23854.4	221416	probe	114	81	1/ IVT	1.48681e+06	74.53	1212.72	19950.3	0.04	4
hCG24487.2	188773	probe	133	106	1/ IVT	1.79165e+06	92.34	1581.67	19402.6	0.04	4
hCG27618.3	128667	probe	52	116	1/ IVT	1.78338e+06	58.95	1454.62	30253.9	0.04	4
hCG27618.3	178580	probe	168	73	1/ IVT	1.67251e+06	100.17	1476.49	16697.2	0.04	4
hCG27777.4	124107	probe	211	51	1/ IVT	1.55587e+06	65.98	1373.52	23582.4	0.04	4
hCG28059.3	107132	probe	211	145	1/ IVT	1.55537e+06	59.43	1373.08	26172.5	0.04	4
hCG32792.2	131054	probe	88	155	1/ IVT	1.76491e+06	38.01	1439.55	46431.9	0.04	4
hCG36787.3	236357	probe	48	144	1/ IVT	1.30968e+06	100.85	1068.25	12987	0.04	4
hCG38189.3	101365	probe	170	28	1/ IVT	1211542	66.87	1069.55	18119	0.04	4
hCG38266.2	703444	probe	219	94	1/ IVT	2.08901e+06	72.76	1844.18	28712.3	0.04	4
hCG38619.2	138921	probe	173	143	1/ IVT	1.66341e+06	99.25	1468.46	16760.2	0.04	4
hCG40086.2	148222	probe	128	35	1/ IVT	1.465e+06	53.15	1293.3	27565.9	0.04	4
hCG401130.4	236541	probe	168	45	1/ IVT	1.50034e+06	105.1	1324.5	14275	0.04	4
hCG91959.3	236346	probe	147	56	1/ IVT	1.24462e+06	48.38	1098.75	25726.5	0.04	4
457707	217527	probe	149	74	1/ IVT	245.89	-1.28	0.22	245.89	0.78	1
371922_rc	225638	probe	25	74	1/ IVT	385.12	-0.03	0.31	385.12	38.02	1
374484_rc	218879	probe	105	84	1/ IVT	163.85	-1.64	0.13	163.85	0.61	1
377797_rc	222093	probe	98	41	1/ IVT	461.77	-1.98	0.38	461.77	0.51	1
387059_rc	223291	probe	69	47	1/ IVT	341.15	0.49	0.28	341.15	2.04	1
390787_rc	227155	probe	158	83	1/ IVT	112.52	-1.78	0.1	112.52	0.56	1
392786_rc	195641	probe	128	108	1/ IVT	165.07	-1.26	0.15	165.07	0.8	1
404893_rc	225460	probe	127	50	1/ IVT	209.37	-0.17	0.18	209.37	5.77	1
425346_rc	222009	probe	162	136	1/ IVT	145.76	-1.5	0.13	145.76	0.67	1
466806_rc	222261	probe	168	133	1/ IVT	45.94	-0.56	0.04	45.94	1.78	1
477453_rc	121124	probe	190	11	1/ IVT	273.84	0.61	0.24	273.84	1.65	1
886870_rc	222033	probe	44	116	1/ IVT	933.92	-0.8	0.76	933.92	1.25	1
AB011137.2	102999	probe	233	136	1/ IVT	155.3	-0.77	0.14	155.3	1.31	1
AF050199.1	106630	probe	107	87	1/ IVT	955.1	-1.23	0.78	955.1	0.81	1
AF359415.1	541732	probe	95	9	1/ IVT	309.88	-0.6	0.25	309.88	1.65	1
AF504647.1	229439	probe	141	8	1/ IVT	126.26	-0.86	0.11	126.26	1.16	1
AJ406951.1	112285	probe	155	34	1/ IVT	370.08	-0.44	0.33	370.08	2.28	1
AK021851.1	158011	probe	123	30	1/ IVT	118	-0.37	0.1	118	2.7	1
AK022411.1	693700	probe	88	69	1/ IVT	147.2	0.21	0.12	147.2	4.7	1
AK022914.1	108534	probe	153	29	1/ IVT	154.13	0.76	0.14	154.13	1.32	1
AK023343.1	232650	probe	215	58	1/ IVT	76.24	0.79	0.07	76.24	1.27	1
AK024448.1	152248	probe	166	108	1/ IVT	906.68	0.27	0.8	906.68	3.72	1
AK026965.1	208561	probe	236	144	1/ IVT	285.24	0.45	0.25	285.24	2.24	1
AK093281.1	157730	probe	182	5	1/ IVT	256.42	-0.28	0.23	256.42	3.52	1
AK126659.1	232265	probe	78	155	1/ IVT	720.55	-1.21	0.59	720.55	0.83	1
AL117445.1	174074	probe	221	73	1/ IVT	126.51	-1.76	0.11	126.51	0.57	1
AL137259.1	171600	probe	4	54	1/ IVT	184.1	0.3	0.15	184.1	3.38	1
AL359572.1	231578	probe	112	105	1/ IVT	452.96	-1.39	0.37	452.96	0.72	1
AX659335.1_CDS_1	199376	probe	73	9	1/ IVT	471.89	-0.81	0.38	471.89	1.23	1
AX805779.1	228597	probe	182	93	1/ IVT	195.93	0.75	0.17	195.93	1.34	1
AX876161.1_CDS_1	114704	probe	74	42	1/ IVT	307.67	0.17	0.25	307.67	5.9	1
AY159812.1	237442	probe	57	48	1/ IVT	244.72	-0.14	0.2	244.72	7.28	1
AY320858.1_CDS_1	199935	probe	16	18	1/ IVT	200.98	0.87	0.16	200.98	1.15	1
BC006164.1	214368	probe	189	124	1/ IVT	340.02	0.33	0.3	340.02	3.04	1
BC010426.1	233476	probe	176	121	1/ IVT	340.97	-0.12	0.3	340.97	8.1	1
BC014198.2	702618	probe	13	28	1/ IVT	626.97	0.38	0.51	626.97	2.64	1
BC019703.1	218771	probe	231	8	1/ IVT	1177.47	0.68	1.04	1177.47	1.46	1
BC027954.1	169714	probe	169	123	1/ IVT	203.85	-0.56	0.18	203.85	1.79	1
BC036040.1	233577	probe	98	144	1/ IVT	206.89	-1.17	0.17	206.89	0.85	1
BC039180.1	179699	probe	46	9	1/ IVT	449.31	0.86	0.37	449.31	1.16	1
BC043273.2	167179	probe	43	113	1/ IVT	221.35	-0.88	0.18	221.35	1.13	1
BC051727.1	312761	probe	47	145	1/ IVT	255.82	0.56	0.21	255.82	1.79	1
BC053887.1	185605	probe	42	9	1/ IVT	413.69	0.5	0.34	413.69	1.99	1
BC065757.1	101695	probe	206	26	1/ IVT	34.73	-1.49	0.03	34.73	0.67	1
ENST00000293094	232046	probe	5	36	1/ IVT	252.16	-1.43	0.21	252.16	0.7	1
hCG14576.3	152113	probe	177	152	1/ IVT	440.37	0.75	0.39	440.37	1.33	1
hCG14584.3	146228	probe	126	94	1/ IVT	190.62	-0.19	0.17	190.62	5.22	1
hCG14606.3	150130	probe	179	129	1/ IVT	99.23	-2.47	0.09	99.23	0.41	1
hCG14619.3	103547	probe	135	151	1/ IVT	154.58	0.09	0.14	154.58	11.07	1
hCG14621.2	110071	probe	115	142	1/ IVT	154.29	-0.78	0.13	154.29	1.28	1
hCG14621.2	136201	probe	185	105	1/ IVT	137.77	0.76	0.12	137.77	1.32	1
hCG14623.2	183774	probe	55	146	1/ IVT	124.29	-0.83	0.1	124.29	1.21	1
hCG14634.2	172361	probe	52	23	1/ IVT	229.66	-0.15	0.19	229.66	6.5	1
hCG14635.2	174790	probe	61	148	1/ IVT	1022.5	-0.67	0.83	1022.5	1.49	1
hCG14649.2	207050	probe	133	143	1/ IVT	175.18	-0.3	0.15	175.18	3.34	1
hCG14664.2	130350	probe	76	44	1/ IVT	253.39	0.92	0.21	253.39	1.09	1
hCG14667.2	170254	probe	85	113	1/ IVT	322.95	-0.66	0.26	322.95	1.52	1
hCG14672.3	218394	probe	9	134	1/ IVT	1034.25	0.18	0.84	1034.25	5.55	1
hCG14693.4	192630	probe	87	3	1/ IVT	380.48	-0.39	0.31	380.48	2.6	1
hCG14694.2	161075	probe	146	31	1/ IVT	241.82	-0.9	0.21	241.82	1.11	1
hCG14696.4	218455	probe	151	138	1/ IVT	228.18	0.25	0.2	228.18	4.06	1
hCG14729.3	105991	probe	138	28	1/ IVT	348.71	-1.88	0.31	348.71	0.53	1
hCG14752.2	191248	probe	49	93	1/ IVT	486.5	0.42	0.4	486.5	2.41	1
hCG14759.4	209820	probe	15	5	1/ IVT	272.91	0.24	0.22	272.91	4.21	1
hCG14769.3	187792	probe	115	85	1/ IVT	172.83	0.54	0.14	172.83	1.86	1
hCG14780.3	223108	probe	149	154	1/ IVT	199.09	0.33	0.18	199.09	3	1
hCG14790.3	202882	probe	45	75	1/ IVT	254.39	-0.04	0.21	254.39	25.57	1
hCG14819.2	202789	probe	178	61	1/ IVT	117.52	0.01	0.1	117.52	87.23	1
hCG14830.3	154060	probe	47	75	1/ IVT	109.9	0.46	0.09	109.9	2.17	1
hCG14830.3	121829	probe	63	159	1/ IVT	122.3	0.79	0.1	122.3	1.27	1
hCG14834.3	171124	probe	58	93	1/ IVT	190.25	-0.48	0.16	190.25	2.07	1
hCG14835.3	177517	probe	65	132	1/ IVT	166.07	0.34	0.14	166.07	2.94	1
hCG14838.2	104531	probe	102	73	1/ IVT	141.91	-1.29	0.12	141.91	0.78	1
hCG14844.3	204967	probe	206	28	1/ IVT	145.15	-0.3	0.13	145.15	3.28	1
hCG14854.2	228828	probe	113	99	1/ IVT	134.19	-1.04	0.11	134.19	0.97	1
hCG14860.3	195028	probe	135	24	1/ IVT	121.58	-1.03	0.11	121.58	0.98	1
hCG14870.4	211315	probe	209	133	1/ IVT	245.67	0.8	0.22	245.67	1.24	1
hCG14873.3	130933	probe	34	39	1/ IVT	89.6	0.09	0.07	89.6	11.19	1
hCG14880.2	149216	probe	135	138	1/ IVT	80.75	-2.11	0.07	80.75	0.48	1
hCG14894.2	202506	probe	154	92	1/ IVT	215.25	-0.9	0.19	215.25	1.11	1
hCG14905.4	210232	probe	37	93	1/ IVT	221.53	-1.18	0.18	221.53	0.85	1
hCG14930.3	156705	probe	26	26	1/ IVT	108.52	0.68	0.09	108.52	1.47	1
hCG14946.2	171458	probe	186	113	1/ IVT	38.51	0.01	0.03	38.51	135.59	1
hCG14961.2	181182	probe	136	92	1/ IVT	1597.54	0.91	1.41	1597.54	1.1	1
hCG14965.2	162210	probe	239	138	1/ IVT	278.26	-0.07	0.25	278.26	14.14	1
hCG14966.2	100064	probe	172	116	1/ IVT	158.03	-0.68	0.14	158.03	1.47	1
hCG14991.2	187241	probe	47	26	1/ IVT	1738.53	0.35	1.42	1738.53	2.83	1
hCG14998.3	143936	probe	50	85	1/ IVT	529.89	-0.07	0.43	529.89	13.66	1
hCG14999.2	187086	probe	55	32	1/ IVT	180.69	0.71	0.15	180.69	1.4	1
hCG15023.2	161767	probe	151	22	1/ IVT	379.08	-0.74	0.33	379.08	1.36	1
hCG15026.2	100572	probe	42	95	1/ IVT	200.04	0.07	0.16	200.04	13.73	1
hCG15048.2	194837	probe	185	70	1/ IVT	107.47	0.82	0.09	107.47	1.23	1
hCG15053.3	206193	probe	97	29	1/ IVT	186.52	-0.21	0.15	186.52	4.71	1
hCG15053.3	234787	probe	133	68	1/ IVT	347.7	-0.58	0.31	347.7	1.73	1
hCG15066.1	144333	probe	167	99	1/ IVT	191.96	-1	0.17	191.96	1	1
hCG15068.3	165166	probe	145	82	1/ IVT	1021.08	0.02	0.9	1021.08	52.31	1
hCG15093.2	166248	probe	105	56	1/ IVT	838.15	-0.33	0.68	838.15	3.01	1
hCG15097.4	127767	probe	110	36	1/ IVT	153.12	-2.26	0.12	153.12	0.44	1
hCG15109.4	216153	probe	102	86	1/ IVT	317.4	-0.73	0.26	317.4	1.37	1
hCG15138.4	108723	probe	105	149	1/ IVT	222.58	0.43	0.18	222.58	2.35	1
hCG15163.2	199618	probe	178	49	1/ IVT	193.21	0.23	0.17	193.21	4.32	1
hCG15171.2	148045	probe	101	106	1/ IVT	278.86	0.56	0.23	278.86	1.79	1
hCG15178.2	138890	probe	183	6	1/ IVT	86.18	0.8	0.08	86.18	1.25	1
hCG15193.3	192935	probe	52	16	1/ IVT	757.7	-0.35	0.62	757.7	2.84	1
hCG15198.3	100288	probe	226	135	1/ IVT	106.55	-0.09	0.09	106.55	11.55	1
hCG15219.3	142348	probe	10	32	1/ IVT	185.38	-1.39	0.15	185.38	0.72	1
hCG15244.3	212795	probe	11	147	1/ IVT	152.11	-2.72	0.12	152.11	0.37	1
hCG15254.3	126360	probe	232	155	1/ IVT	356.92	-0.02	0.32	356.92	45.83	1
hCG15256.3	171463	probe	196	85	1/ IVT	173.78	0.71	0.15	173.78	1.42	1
hCG15261.4	215653	probe	205	135	1/ IVT	168.5	-0.63	0.15	168.5	1.6	1
hCG15283.4	204569	probe	144	44	1/ IVT	245.45	0.92	0.22	245.45	1.09	1
hCG15291.3	158624	probe	104	18	1/ IVT	457.5	0.3	0.37	457.5	3.34	1
hCG15295.2	205372	probe	19	23	1/ IVT	160.5	0.14	0.13	160.5	7.24	1
hCG15308.2	117474	probe	95	117	1/ IVT	926.38	0.6	0.76	926.38	1.67	1
hCG15313.2	210299	probe	212	152	1/ IVT	291.6	-0.69	0.26	291.6	1.44	1
hCG15317.4	155366	probe	96	98	1/ IVT	268.85	-1.5	0.22	268.85	0.67	1
hCG15318.3	122707	probe	86	102	1/ IVT	196.14	-0.17	0.16	196.14	5.75	1
hCG15320.3	178078	probe	188	149	1/ IVT	120.87	0.64	0.11	120.87	1.56	1
hCG15321.2	180503	probe	115	9	1/ IVT	275.63	-0.79	0.22	275.63	1.27	1
hCG15322.3	112106	probe	232	55	1/ IVT	67.77	-1.28	0.06	67.77	0.78	1
hCG15323.2	216357	probe	69	97	1/ IVT	258.91	-1.06	0.21	258.91	0.94	1
hCG15326.2	167168	probe	169	106	1/ IVT	233.29	-0.27	0.21	233.29	3.71	1
hCG15328.2	115258	probe	89	41	1/ IVT	148.42	-0.22	0.12	148.42	4.59	1
hCG15328.2	175745	probe	202	24	1/ IVT	83.88	-0.52	0.07	83.88	1.93	1
hCG15334.2	186288	probe	188	61	1/ IVT	206.21	0.04	0.18	206.21	27.66	1
hCG15341.4	196645	probe	105	141	1/ IVT	412.5	-0.16	0.34	412.5	6.37	1
hCG15348.3	199794	probe	137	142	1/ IVT	412.73	-0.61	0.36	412.73	1.65	1
hCG15349.3	129748	probe	162	62	1/ IVT	94.31	-2.27	0.08	94.31	0.44	1
hCG15360.2	185378	probe	82	9	1/ IVT	864.4	-0.16	0.71	864.4	6.32	1
hCG15381.3	105756	probe	116	93	1/ IVT	155.14	0.15	0.13	155.14	6.73	1
hCG15392.3	158861	probe	68	10	1/ IVT	2095.62	0.24	1.71	2095.62	4.1	1
hCG15397.3	217072	probe	229	130	1/ IVT	110.57	0.38	0.1	110.57	2.62	1
hCG15399.2	179403	probe	49	148	1/ IVT	500.28	-1.36	0.41	500.28	0.73	1
hCG15406.3	120488	probe	189	105	1/ IVT	734.8	-1.41	0.65	734.8	0.71	1
hCG15430.3	137699	probe	107	159	1/ IVT	220.87	-1.77	0.18	220.87	0.57	1
hCG15432.3	235170	probe	68	84	1/ IVT	231.74	0.44	0.19	231.74	2.26	1
hCG15437.3	189926	probe	208	11	1/ IVT	201.61	-1.36	0.18	201.61	0.74	1
hCG15440.2	207590	probe	167	114	1/ IVT	183.52	0.13	0.16	183.52	7.81	1
hCG15441.2	174638	probe	223	104	1/ IVT	625.26	0.02	0.55	625.26	48.1	1
hCG15444.3	174547	probe	236	101	1/ IVT	237.61	-1.35	0.21	237.61	0.74	1
hCG15447.3	129974	probe	238	114	1/ IVT	96.53	-1.89	0.09	96.53	0.53	1
hCG15472.3	192373	probe	154	50	1/ IVT	330.82	0.98	0.29	330.82	1.02	1
hCG15476.3	193186	probe	65	22	1/ IVT	518.85	0.18	0.42	518.85	5.6	1
hCG15476.3	109922	probe	70	94	1/ IVT	621.64	0.26	0.51	621.64	3.83	1
hCG15479.4	132805	probe	89	46	1/ IVT	257.68	0.13	0.21	257.68	7.75	1
hCG15485.3	174314	probe	31	90	1/ IVT	308.91	-0.24	0.25	308.91	4.24	1
hCG15494.2	129040	probe	134	10	1/ IVT	91.55	-1.61	0.08	91.55	0.62	1
hCG15495.3	169003	probe	78	7	1/ IVT	100.53	-0.99	0.08	100.53	1.01	1
hCG15499.4	112323	probe	232	38	1/ IVT	125.27	-1	0.11	125.27	1	1
hCG15512.3	136614	probe	22	22	1/ IVT	282.05	-0.04	0.23	282.05	23.65	1
hCG15518.3	201682	probe	192	12	1/ IVT	473.73	-0.53	0.42	473.73	1.88	1
hCG15519.2	134034	probe	93	29	1/ IVT	563.64	0.72	0.46	563.64	1.4	1
hCG15520.3	148963	probe	101	7	1/ IVT	366.65	0.73	0.3	366.65	1.37	1
hCG15525.3	126764	probe	163	18	1/ IVT	67.94	-0.29	0.06	67.94	3.46	1
hCG15553.3	136748	probe	185	116	1/ IVT	40.71	0.61	0.04	40.71	1.63	1
hCG15590.3	216585	probe	225	13	1/ IVT	106.77	-1.51	0.09	106.77	0.66	1
hCG15613.3	222126	probe	96	144	1/ IVT	245.41	-1.32	0.2	245.41	0.76	1
hCG15615.3	115147	probe	66	157	1/ IVT	346.32	-1.08	0.28	346.32	0.92	1
hCG15647.2	213218	probe	47	64	1/ IVT	188.93	-0.85	0.15	188.93	1.18	1
hCG15669.4	163822	probe	104	65	1/ IVT	114.77	0	0.09	114.77	216.3	1
hCG15693.3	190465	probe	81	153	1/ IVT	199.98	0.18	0.16	199.98	5.56	1
hCG15701.3	205038	probe	83	72	1/ IVT	208.31	-1.1	0.17	208.31	0.91	1
hCG15731.3	134635	probe	7	122	1/ IVT	107.22	0.67	0.09	107.22	1.49	1
hCG15756.2	169472	probe	43	66	1/ IVT	594.77	0.38	0.49	594.77	2.61	1
hCG15760.3	193211	probe	45	18	1/ IVT	113.14	-0.28	0.09	113.14	3.6	1
hCG15774.3	115999	probe	59	151	1/ IVT	559.83	0.8	0.46	559.83	1.25	1
hCG15781.3	103877	probe	123	93	1/ IVT	98.39	-0.06	0.09	98.39	16.14	1
hCG15784.2	121704	probe	124	74	1/ IVT	199.96	-2.15	0.18	199.96	0.47	1
hCG15798.2	222738	probe	174	13	1/ IVT	79.44	0.49	0.07	79.44	2.03	1
hCG15830.2	123925	probe	123	45	1/ IVT	201.77	0.58	0.18	201.77	1.74	1
hCG15849.3	120981	probe	212	136	1/ IVT	139.75	0.13	0.12	139.75	7.68	1
hCG15857.3	204389	probe	222	14	1/ IVT	276.27	0.4	0.24	276.27	2.5	1
hCG15876.3	154792	probe	82	126	1/ IVT	317.29	-0.1	0.26	317.29	9.89	1
hCG15883.2	169001	probe	209	110	1/ IVT	473.27	-0.17	0.42	473.27	5.9	1
hCG15922.2	105837	probe	194	55	1/ IVT	630.62	-0.3	0.56	630.62	3.33	1
hCG15924.4	192931	probe	57	155	1/ IVT	793.11	0.23	0.65	793.11	4.35	1
hCG15929.3	203338	probe	37	47	1/ IVT	543.64	0.32	0.44	543.64	3.09	1
hCG15935.2	146938	probe	129	145	1/ IVT	451.62	-0.37	0.4	451.62	2.67	1
hCG15938.2	169837	probe	221	67	1/ IVT	109.12	-0.18	0.1	109.12	5.71	1
hCG15952.3	183323	probe	201	17	1/ IVT	115.24	-0.36	0.1	115.24	2.8	1
hCG15953.3	107922	probe	122	64	1/ IVT	127.72	-1.73	0.11	127.72	0.58	1
hCG15959.3	123461	probe	185	95	1/ IVT	119.65	-2.2	0.11	119.65	0.46	1
hCG15983.3	230968	probe	58	31	1/ IVT	153.43	-0.81	0.13	153.43	1.24	1
hCG15987.3	156190	probe	214	132	1/ IVT	182.74	-2	0.16	182.74	0.5	1
hCG15990.3	160108	probe	1	44	1/ IVT	210.93	-0.04	0.17	210.93	27.69	1
hCG15990.3	113147	probe	130	1	1/ IVT	92.45	-1.34	0.08	92.45	0.75	1
hCG15999.3	109410	probe	171	4	1/ IVT	289.14	-0.34	0.26	289.14	2.93	1
hCG16018.3	157338	probe	18	53	1/ IVT	514.23	-0.29	0.42	514.23	3.47	1
hCG16022.3	227712	probe	145	84	1/ IVT	115.65	-0.4	0.1	115.65	2.51	1
hCG16028.3	225251	probe	74	91	1/ IVT	157.8	0.24	0.13	157.8	4.1	1
hCG16029.3	214534	probe	93	1	1/ IVT	158.01	-0.23	0.13	158.01	4.31	1
hCG16031.2	218810	probe	191	132	1/ IVT	77.28	-0.06	0.07	77.28	15.84	1
hCG16053.3	129085	probe	176	46	1/ IVT	82.11	-2.48	0.07	82.11	0.4	1
hCG16056.2	108674	probe	45	6	1/ IVT	159.5	-0.24	0.13	159.5	4.15	1
hCG16061.3	191167	probe	175	149	1/ IVT	936.18	-0.2	0.83	936.18	5.12	1
hCG16067.2	194477	probe	66	49	1/ IVT	549.99	0.32	0.45	549.99	3.15	1
hCG16081.3	191554	probe	51	85	1/ IVT	2005.15	-0.43	1.64	2005.15	2.32	1
hCG16110.3	113632	probe	11	110	1/ IVT	344.59	0.33	0.28	344.59	2.99	1
hCG16114.3	105249	probe	134	36	1/ IVT	214.93	-1.21	0.19	214.93	0.83	1
hCG16118.2	202586	probe	62	105	1/ IVT	122.92	0.73	0.1	122.92	1.36	1
hCG16138.3	134853	probe	22	83	1/ IVT	166.9	-0.16	0.14	166.9	6.43	1
hCG16147.3	186803	probe	122	25	1/ IVT	149.19	1	0.13	149.19	1	1
hCG16150.2	179061	probe	162	95	1/ IVT	124.02	0.09	0.11	124.02	10.7	1
hCG16165.3	199267	probe	74	84	1/ IVT	387.92	-0.29	0.32	387.92	3.5	1
hCG16187.2	153383	probe	169	36	1/ IVT	197.98	-0.53	0.17	197.98	1.9	1
hCG16190.4	136651	probe	70	125	1/ IVT	819.49	-0.65	0.67	819.49	1.53	1
hCG16205.3	204458	probe	177	44	1/ IVT	167.26	-0.76	0.15	167.26	1.32	1
hCG16212.3	104936	probe	83	156	1/ IVT	521.06	-0.17	0.43	521.06	5.79	1
hCG16217.2	103297	probe	107	83	1/ IVT	161.5	-0.47	0.13	161.5	2.13	1
hCG16225.4	707897	probe	131	135	1/ IVT	501.55	0.31	0.44	501.55	3.28	1
hCG16229.1	140651	probe	106	52	1/ IVT	168.59	-0.39	0.14	168.59	2.6	1
hCG16236.3	143564	probe	108	112	1/ IVT	158.8	0.41	0.13	158.8	2.43	1
hCG16236.3	180927	probe	209	50	1/ IVT	93.6	-1.33	0.08	93.6	0.76	1
hCG16240.3	209614	probe	209	127	1/ IVT	644.45	0.68	0.57	644.45	1.46	1
hCG16241.2	127917	probe	161	57	1/ IVT	103.07	-0.5	0.09	103.07	1.98	1
hCG16247.2	119853	probe	191	143	1/ IVT	99.33	0.14	0.09	99.33	7.37	1
hCG16256.3	201310	probe	56	150	1/ IVT	1560.64	0	1.27	1560.64	5440.62	1
hCG16260.3	192039	probe	94	14	1/ IVT	950.77	-1.06	0.78	950.77	0.95	1
hCG16283.3	193551	probe	134	54	1/ IVT	176.36	-0.83	0.16	176.36	1.21	1
hCG16286.2	236969	probe	76	74	1/ IVT	283.94	-1.28	0.23	283.94	0.78	1
hCG16301.2	165607	probe	164	6	1/ IVT	95.46	0.28	0.08	95.46	3.52	1
hCG16316.4	160222	probe	118	76	1/ IVT	147.08	-0.46	0.12	147.08	2.17	1
hCG16321.4	177780	probe	186	28	1/ IVT	32.3	-2.61	0.03	32.3	0.39	1
hCG16325.4	173237	probe	46	142	1/ IVT	348.01	-0.16	0.28	348.01	6.19	1
hCG16335.3	199474	probe	115	118	1/ IVT	414.49	-0.46	0.34	414.49	2.15	1
hCG16337.2	109836	probe	204	125	1/ IVT	705.12	-0.29	0.62	705.12	3.43	1
hCG16363.1	123749	probe	237	39	1/ IVT	148.26	0.96	0.13	148.26	1.04	1
hCG16364.3	188807	probe	135	5	1/ IVT	299.73	-0.14	0.26	299.73	7.13	1
hCG16365.2	163252	probe	56	68	1/ IVT	329.72	-0.98	0.27	329.72	1.02	1
hCG16371.3	119072	probe	44	61	1/ IVT	188.06	0.6	0.15	188.06	1.68	1
hCG16373.2	116792	probe	172	24	1/ IVT	83.95	-2.39	0.07	83.95	0.42	1
hCG16381.1	132007	probe	138	106	1/ IVT	422.51	-0.15	0.37	422.51	6.52	1
hCG16382.2	118163	probe	225	58	1/ IVT	87.74	0.43	0.08	87.74	2.31	1
hCG16397.3	196924	probe	203	55	1/ IVT	106.74	-0.32	0.09	106.74	3.15	1
hCG1639753.2	130046	probe	183	37	1/ IVT	147.89	-0.23	0.13	147.89	4.26	1
hCG1639760.2	139804	probe	165	112	1/ IVT	119.22	-0.68	0.11	119.22	1.46	1
hCG1639763.4	107124	probe	149	149	1/ IVT	686.22	-0.11	0.61	686.22	9.3	1
hCG1639778.4	172176	probe	125	51	1/ IVT	587.34	0.91	0.52	587.34	1.1	1
hCG1639794.4	102647	probe	126	132	1/ IVT	223.95	0.34	0.2	223.95	2.92	1
hCG1639805.4	192498	probe	81	32	1/ IVT	191.24	-0.52	0.16	191.24	1.92	1
hCG1639816.4	215505	probe	124	15	1/ IVT	359.13	0.77	0.32	359.13	1.29	1
hCG1639823.3	183514	probe	194	156	1/ IVT	85.81	0.61	0.08	85.81	1.64	1
hCG1639826.3	140541	probe	179	115	1/ IVT	105.44	-0.03	0.09	105.44	30.29	1
hCG1639847.4	154657	probe	143	64	1/ IVT	128.56	0.93	0.11	128.56	1.08	1
hCG1639849.3	101814	probe	193	139	1/ IVT	163.51	0.44	0.14	163.51	2.3	1
hCG1639850.2	194586	probe	229	72	1/ IVT	126.04	-1.04	0.11	126.04	0.97	1
hCG1639853.3	125060	probe	178	130	1/ IVT	178.25	-0.16	0.16	178.25	6.29	1
hCG1639857.3	230745	probe	150	155	1/ IVT	222.77	-0.21	0.2	222.77	4.66	1
hCG1639864.2	138062	probe	213	15	1/ IVT	132.58	-0.91	0.12	132.58	1.1	1
hCG1639867.3	129325	probe	192	153	1/ IVT	165.16	0.98	0.15	165.16	1.02	1
hCG1639872.2	228458	probe	134	149	1/ IVT	92.95	-0.42	0.08	92.95	2.35	1
hCG1639886.3	704559	probe	103	145	1/ IVT	136.23	-0.96	0.11	136.23	1.04	1
hCG1639889.2	115598	probe	102	129	1/ IVT	178.86	-0.86	0.15	178.86	1.16	1
hCG1639889.2	173149	probe	170	16	1/ IVT	182.45	0.48	0.16	182.45	2.09	1
hCG16399.3	113948	probe	165	126	1/ IVT	97.74	-0.22	0.09	97.74	4.56	1
hCG1639952.3	182686	probe	206	91	1/ IVT	137.03	-1.44	0.12	137.03	0.7	1
hCG1639973.3	228252	probe	185	35	1/ IVT	87.09	-0.3	0.08	87.09	3.36	1
hCG1639976.2	132306	probe	91	155	1/ IVT	301.01	-1.48	0.25	301.01	0.68	1
hCG1639989.3	154130	probe	119	74	1/ IVT	92.45	-1.58	0.08	92.45	0.63	1
hCG1640002.3	232940	probe	35	130	1/ IVT	164.46	-0.41	0.13	164.46	2.43	1
hCG1640003.3	163595	probe	11	118	1/ IVT	525.96	0.29	0.43	525.96	3.48	1
hCG1640013.4	111793	probe	155	143	1/ IVT	345.09	-0.6	0.3	345.09	1.66	1
hCG1640053.3	193415	probe	113	150	1/ IVT	415.25	-1.35	0.34	415.25	0.74	1
hCG1640057.3	129598	probe	225	150	1/ IVT	131.15	-0.22	0.12	131.15	4.46	1
hCG1640065.3	202391	probe	115	47	1/ IVT	162.74	0.56	0.13	162.74	1.79	1
hCG1640068.3	184902	probe	25	41	1/ IVT	332.37	0.46	0.27	332.37	2.17	1
hCG1640071.3	185920	probe	53	119	1/ IVT	143.43	-0.47	0.12	143.43	2.14	1
hCG1640102.3	117549	probe	58	26	1/ IVT	199.67	-0.77	0.16	199.67	1.29	1
hCG1640106.3	158959	probe	88	47	1/ IVT	143.76	0.17	0.12	143.76	5.81	1
hCG1640139.4	214065	probe	184	32	1/ IVT	187.57	-1.25	0.17	187.57	0.8	1
hCG1640164.2	257484	probe	215	121	1/ IVT	297.82	-0.05	0.26	297.82	20.58	1
hCG1640186.3	143996	probe	93	17	1/ IVT	382.5	-1.16	0.31	382.5	0.87	1
hCG1640193.2	177346	probe	16	12	1/ IVT	287.66	-0.65	0.23	287.66	1.53	1
hCG1640214.4	135137	probe	58	154	1/ IVT	509.14	0.53	0.42	509.14	1.9	1
hCG1640219.2	228665	probe	34	121	1/ IVT	277.95	0.49	0.23	277.95	2.05	1
hCG1640255.3	223165	probe	219	108	1/ IVT	435.74	-0.22	0.38	435.74	4.64	1
hCG1640280.3	163372	probe	225	146	1/ IVT	92.9	-0.6	0.08	92.9	1.67	1
hCG1640293.1	177496	probe	96	17	1/ IVT	506.45	-0.53	0.41	506.45	1.9	1
hCG1640313.3	101403	probe	202	35	1/ IVT	132.45	0.02	0.12	132.45	47.84	1
hCG1640325.2	119762	probe	116	137	1/ IVT	198.92	0.37	0.16	198.92	2.71	1
hCG1640329.4	124334	probe	238	29	1/ IVT	279.39	0.78	0.25	279.39	1.28	1
hCG1640339.1	170405	probe	52	27	1/ IVT	1872.07	-0.67	1.53	1872.07	1.49	1
hCG1640344.3	193773	probe	119	91	1/ IVT	70.84	0.07	0.06	70.84	15.29	1
hCG1640346.4	130983	probe	34	103	1/ IVT	1256.58	-1.07	1.02	1256.58	0.94	1
hCG1640349.4	713500	probe	148	69	1/ IVT	125.8	0.39	0.11	125.8	2.53	1
hCG1640359.3	167552	probe	225	109	1/ IVT	265.02	0.18	0.23	265.02	5.67	1
hCG1640364.3	233899	probe	37	94	1/ IVT	166.4	0.78	0.14	166.4	1.29	1
hCG1640369.4	218065	probe	132	121	1/ IVT	232.67	-0.01	0.21	232.67	96.13	1
hCG1640375.3	194328	probe	205	107	1/ IVT	205.79	0.97	0.18	205.79	1.03	1
hCG1640387.2	162340	probe	235	6	1/ IVT	90.96	-0.67	0.08	90.96	1.5	1
hCG1640414.2	174717	probe	52	110	1/ IVT	141.29	-0.89	0.12	141.29	1.12	1
hCG1640416.3	131502	probe	111	125	1/ IVT	531.84	-0.71	0.43	531.84	1.4	1
hCG1640445.2	143499	probe	218	57	1/ IVT	336.35	-0.34	0.3	336.35	2.91	1
hCG1640454.2	147811	probe	191	4	1/ IVT	1731.88	-0.7	1.53	1731.88	1.42	1
hCG1640457.4	224206	probe	48	58	1/ IVT	195.62	0.08	0.16	195.62	12.97	1
hCG1640484.2	468490	probe	208	52	1/ IVT	671.88	-0.09	0.59	671.88	10.61	1
hCG1640493.3	125158	probe	114	123	1/ IVT	228.5	-1.39	0.19	228.5	0.72	1
hCG1640499.4	179267	probe	154	56	1/ IVT	137.01	-1.32	0.12	137.01	0.76	1
hCG1640515.3	175604	probe	132	135	1/ IVT	197.29	-2.32	0.17	197.29	0.43	1
hCG1640519.3	107658	probe	83	47	1/ IVT	146.97	-1.42	0.12	146.97	0.71	1
hCG1640519.3	122466	probe	119	92	1/ IVT	173.96	0.31	0.14	173.96	3.21	1
hCG1640529.2	201248	probe	77	147	1/ IVT	118.07	0.56	0.1	118.07	1.79	1
hCG1640531.4	188867	probe	226	35	1/ IVT	134.7	0.65	0.12	134.7	1.54	1
hCG1640533.2	162661	probe	79	112	1/ IVT	156.15	-0.22	0.13	156.15	4.58	1
hCG1640542.2	118072	probe	6	39	1/ IVT	130.37	0.48	0.11	130.37	2.1	1
hCG1640549.4	231963	probe	69	59	1/ IVT	162.79	0.89	0.13	162.79	1.12	1
hCG1640553.2	205924	probe	44	35	1/ IVT	257.12	0.43	0.21	257.12	2.33	1
hCG1640565.3	221844	probe	87	127	1/ IVT	279.59	0.1	0.23	279.59	9.85	1
hCG1640593.3	146072	probe	205	108	1/ IVT	109.79	0.85	0.1	109.79	1.18	1
hCG1640599.3	229405	probe	99	146	1/ IVT	483.45	-1.27	0.39	483.45	0.79	1
hCG1640609.1	136794	probe	82	2	1/ IVT	275.75	0.42	0.22	275.75	2.37	1
hCG1640628.3	151155	probe	6	72	1/ IVT	301.26	0.99	0.25	301.26	1.01	1
hCG1640636.2	233307	probe	56	19	1/ IVT	256	-1.63	0.21	256	0.62	1
hCG1640644.3	110136	probe	136	43	1/ IVT	844.46	-0.52	0.75	844.46	1.93	1
hCG1640645.2	190449	probe	75	66	1/ IVT	347.34	-0.09	0.28	347.34	11.44	1
hCG1640653.2	176377	probe	170	125	1/ IVT	139.76	0.55	0.12	139.76	1.81	1
hCG1640654.3	106160	probe	18	126	1/ IVT	134.54	0.28	0.11	134.54	3.56	1
hCG1640673.3	199931	probe	131	33	1/ IVT	168.11	-0.88	0.15	168.11	1.14	1
hCG1640698.3	108394	probe	227	81	1/ IVT	80.18	0.7	0.07	80.18	1.44	1
hCG16407.3	170759	probe	143	45	1/ IVT	169.14	0.24	0.15	169.14	4.21	1
hCG1640700.3	157169	probe	73	118	1/ IVT	303.92	0.38	0.25	303.92	2.65	1
hCG1640719.3	230555	probe	204	53	1/ IVT	99.56	-1.12	0.09	99.56	0.89	1
hCG1640737.3	139192	probe	216	1	1/ IVT	246.16	-0.98	0.22	246.16	1.02	1
hCG1640741.3	230222	probe	117	87	1/ IVT	285.6	1	0.23	285.6	1	1
hCG1640779.4	110900	probe	41	87	1/ IVT	103.95	0.4	0.08	103.95	2.52	1
hCG1640784.3	232351	probe	90	58	1/ IVT	175.91	0.28	0.14	175.91	3.58	1
hCG1640791.3	188699	probe	105	99	1/ IVT	238.48	-1.18	0.19	238.48	0.85	1
hCG1640792.3	228049	probe	35	46	1/ IVT	169.34	-1.14	0.14	169.34	0.88	1
hCG1640814.4	226128	probe	97	23	1/ IVT	90.99	0.31	0.07	90.99	3.2	1
hCG1640814.4	122477	probe	103	82	1/ IVT	120.68	-1.28	0.1	120.68	0.78	1
hCG1640838.3	155355	probe	132	16	1/ IVT	390.32	-1.23	0.34	390.32	0.81	1
hCG1640838.3	136923	probe	236	132	1/ IVT	359.2	-1.18	0.32	359.2	0.85	1
hCG1640844.3	108623	probe	182	4	1/ IVT	233.92	-1.62	0.21	233.92	0.62	1
hCG1640852.3	126445	probe	24	154	1/ IVT	68.64	-0.41	0.06	68.64	2.46	1
hCG1640854.3	234362	probe	3	145	1/ IVT	153.25	-0.71	0.13	153.25	1.41	1
hCG1640869.3	536277	probe	75	113	1/ IVT	279.27	0.69	0.23	279.27	1.46	1
hCG1640874.3	207786	probe	3	126	1/ IVT	199.32	0.77	0.16	199.32	1.29	1
hCG1640876.3	194752	probe	229	73	1/ IVT	282.42	-2.03	0.25	282.42	0.49	1
hCG16409.3	135851	probe	222	105	1/ IVT	477.85	-0.3	0.42	477.85	3.31	1
hCG1640921.3	162191	probe	134	116	1/ IVT	178.58	-0.77	0.16	178.58	1.3	1
hCG1640924.2	190926	probe	55	46	1/ IVT	131.33	0.32	0.11	131.33	3.09	1
hCG1640930.3	211072	probe	39	35	1/ IVT	399.04	0.7	0.33	399.04	1.43	1
hCG1640936.3	104454	probe	144	139	1/ IVT	1029.44	0.5	0.91	1029.44	1.99	1
hCG1640982.2	229225	probe	161	7	1/ IVT	131.38	0.02	0.12	131.38	51.22	1
hCG1640986.3	195742	probe	49	46	1/ IVT	418.77	-0.58	0.34	418.77	1.73	1
hCG1641001.4	108672	probe	218	8	1/ IVT	129.92	-0.14	0.11	129.92	6.99	1
hCG1641005.2	103458	probe	172	133	1/ IVT	392.35	0.21	0.35	392.35	4.66	1
hCG1641016.3	223065	probe	216	150	1/ IVT	261.85	-0.54	0.23	261.85	1.85	1
hCG1641068.3	232512	probe	27	46	1/ IVT	118.42	-0.18	0.1	118.42	5.68	1
hCG1641096.3	197227	probe	185	49	1/ IVT	176.51	0.13	0.16	176.51	7.62	1
hCG1641108.2	180331	probe	53	44	1/ IVT	216.73	0.53	0.18	216.73	1.87	1
hCG1641110.3	136211	probe	174	136	1/ IVT	171.43	0.37	0.15	171.43	2.69	1
hCG1641117.3	115556	probe	151	127	1/ IVT	181.27	0.58	0.16	181.27	1.71	1
hCG1641137.3	675241	probe	129	14	1/ IVT	282.48	0.6	0.25	282.48	1.66	1
hCG1641138.2	219839	probe	50	96	1/ IVT	403.9	1	0.33	403.9	1	1
hCG1641147.3	143393	probe	53	47	1/ IVT	354.64	1	0.29	354.64	1.01	1
hCG1641157.3	233815	probe	95	16	1/ IVT	431.6	0.68	0.35	431.6	1.46	1
hCG1641167.3	179512	probe	157	58	1/ IVT	167.34	0.11	0.15	167.34	9.38	1
hCG1641173.2	190775	probe	163	119	1/ IVT	189.86	-0.95	0.17	189.86	1.05	1
hCG1641199.2	107613	probe	54	95	1/ IVT	215.92	-0.84	0.18	215.92	1.19	1
hCG16412.3	216719	probe	222	158	1/ IVT	158.55	0.92	0.14	158.55	1.09	1
hCG1641215.3	184645	probe	127	78	1/ IVT	196.99	-0.75	0.17	196.99	1.34	1
hCG1641222.3	126493	probe	73	106	1/ IVT	1605.06	0.5	1.31	1605.06	2	1
hCG1641222.3	209109	probe	223	128	1/ IVT	239.59	-0.5	0.21	239.59	1.98	1
hCG1641224.3	233446	probe	98	70	1/ IVT	302.15	-0.71	0.25	302.15	1.41	1
hCG1641225.3	106309	probe	149	71	1/ IVT	613.8	0.94	0.54	613.8	1.07	1
hCG1641227.3	125187	probe	84	5	1/ IVT	90.73	-0.89	0.07	90.73	1.12	1
hCG1641238.3	102450	probe	189	97	1/ IVT	115.51	0.53	0.1	115.51	1.88	1
hCG1641276.4	159741	probe	151	153	1/ IVT	294.22	-2	0.26	294.22	0.5	1
hCG1641280.3	102730	probe	34	53	1/ IVT	143.46	0.28	0.12	143.46	3.6	1
hCG1641285.2	125513	probe	129	114	1/ IVT	100.09	-2.51	0.09	100.09	0.4	1
hCG1641328.2	100830	probe	103	13	1/ IVT	240.22	-0.09	0.2	240.22	10.77	1
hCG1641337.1	160411	probe	147	16	1/ IVT	194.3	0.29	0.17	194.3	3.48	1
hCG1641338.3	213788	probe	216	105	1/ IVT	455.88	-0.55	0.4	455.88	1.81	1
hCG1641357.3	163619	probe	126	27	1/ IVT	280.28	0.25	0.25	280.28	3.93	1
hCG1641364.3	149391	probe	89	38	1/ IVT	181.89	0.21	0.15	181.89	4.76	1
hCG1641464.2	170987	probe	227	16	1/ IVT	327.91	-0.6	0.29	327.91	1.66	1
hCG1641477.4	236186	probe	87	152	1/ IVT	276.09	0.22	0.23	276.09	4.51	1
hCG1641486.3	206762	probe	105	147	1/ IVT	277.54	-0.24	0.23	277.54	4.2	1
hCG1641487.4	147050	probe	215	51	1/ IVT	234.15	0.96	0.21	234.15	1.04	1
hCG1641490.2	149565	probe	117	14	1/ IVT	5845.56	-0.31	4.77	5845.56	3.22	1
hCG1641491.4	104827	probe	50	97	1/ IVT	198.53	-0.11	0.16	198.53	9.07	1
hCG1641498.3	198317	probe	78	131	1/ IVT	169.36	-1.4	0.14	169.36	0.72	1
hCG16415.3	193005	probe	117	88	1/ IVT	137.75	-0.91	0.11	137.75	1.1	1
hCG1641507.1	218928	probe	236	135	1/ IVT	1810.04	0.92	1.6	1810.04	1.09	1
hCG1641509.3	106323	probe	99	154	1/ IVT	268	-0.87	0.22	268	1.15	1
hCG1641510.4	158076	probe	81	129	1/ IVT	467.27	0.24	0.38	467.27	4.23	1
hCG1641512.3	236641	probe	27	25	1/ IVT	112.56	0.97	0.09	112.56	1.04	1
hCG1641525.3	189281	probe	103	17	1/ IVT	818.5	0.41	0.67	818.5	2.44	1
hCG1641527.3	143427	probe	132	143	1/ IVT	277.93	-1.15	0.25	277.93	0.87	1
hCG1641533.2	198623	probe	67	47	1/ IVT	344.2	-1.49	0.28	344.2	0.67	1
hCG1641539.2	157195	probe	225	112	1/ IVT	116.46	0.68	0.1	116.46	1.47	1
hCG1641541.2	182266	probe	145	139	1/ IVT	196.42	-1.39	0.17	196.42	0.72	1
hCG1641544.3	234913	probe	94	109	1/ IVT	1223.64	-0.15	1	1223.64	6.79	1
hCG1641574.2	178077	probe	50	22	1/ IVT	163.57	-0.89	0.13	163.57	1.12	1
hCG1641586.2	172316	probe	157	55	1/ IVT	182.61	0.91	0.16	182.61	1.1	1
hCG1641615.3	138143	probe	15	99	1/ IVT	1077.07	-0.45	0.88	1077.07	2.24	1
hCG1641618.4	228835	probe	67	30	1/ IVT	119.47	-2.07	0.1	119.47	0.48	1
hCG1641630.3	187111	probe	91	9	1/ IVT	297.92	0.37	0.24	297.92	2.68	1
hCG1641650.3	213263	probe	92	127	1/ IVT	1749.74	-0.12	1.43	1749.74	8.42	1
hCG1641702.3	212674	probe	19	10	1/ IVT	257.77	-0.46	0.21	257.77	2.15	1
hCG1641721.4	169642	probe	37	48	1/ IVT	384.31	-0.18	0.31	384.31	5.56	1
hCG1641723.3	150804	probe	38	118	1/ IVT	530.82	0	0.43	530.82	270.92	1
hCG1641733.2	121093	probe	122	151	1/ IVT	205.85	0.34	0.18	205.85	2.92	1
hCG1641756.3	164097	probe	96	114	1/ IVT	510.66	0.28	0.42	510.66	3.61	1
hCG1641756.3	102684	probe	149	73	1/ IVT	197.36	-0.03	0.17	197.36	34.54	1
hCG1641761.3	136853	probe	98	146	1/ IVT	1146.97	-1.11	0.94	1146.97	0.9	1
hCG1641783.1	178056	probe	105	116	1/ IVT	507.13	0.85	0.41	507.13	1.18	1
hCG1641787.3	172036	probe	199	123	1/ IVT	115.13	-1.75	0.1	115.13	0.57	1
hCG1641789.3	144407	probe	138	128	1/ IVT	319.37	0.44	0.28	319.37	2.3	1
hCG1641796.2	231257	probe	230	19	1/ IVT	142.84	0.93	0.13	142.84	1.08	1
hCG1641799.4	231181	probe	85	58	1/ IVT	222.18	-0.1	0.18	222.18	10.17	1
hCG1641819.3	145459	probe	18	132	1/ IVT	137.72	-1.03	0.11	137.72	0.97	1
hCG1641824.4	135422	probe	96	88	1/ IVT	360.98	-0.69	0.29	360.98	1.45	1
hCG1641833.3	198223	probe	149	7	1/ IVT	546.48	-0.97	0.48	546.48	1.03	1
hCG1641833.3	234605	probe	230	146	1/ IVT	664.97	-0.99	0.59	664.97	1.01	1
hCG1641866.1	198154	probe	43	117	1/ IVT	1040.04	-0.02	0.85	1040.04	65.24	1
hCG1641869.2	120117	probe	151	24	1/ IVT	346.73	-0.15	0.31	346.73	6.78	1
hCG1641874.2	104878	probe	139	63	1/ IVT	143.43	-0.22	0.13	143.43	4.61	1
hCG1641896.4	200885	probe	154	1	1/ IVT	506.68	0.51	0.45	506.68	1.98	1
hCG1641907.2	114692	probe	127	111	1/ IVT	217.13	-1.96	0.19	217.13	0.51	1
hCG1641945.4	232398	probe	209	134	1/ IVT	331.17	-0.5	0.29	331.17	1.99	1
hCG1641949.2	234176	probe	235	7	1/ IVT	150.52	-0.31	0.13	150.52	3.18	1
hCG1641952.3	132030	probe	148	117	1/ IVT	276.07	0	0.24	276.07	906.77	1
hCG1641955.3	191090	probe	11	155	1/ IVT	175.17	0.11	0.14	175.17	9.48	1
hCG1641961.3	172158	probe	197	110	1/ IVT	129.13	-0.17	0.11	129.13	5.95	1
hCG1641962.2	229637	probe	111	78	1/ IVT	152.87	0.73	0.12	152.87	1.37	1
hCG1642014.2	228613	probe	223	73	1/ IVT	82.28	-1.04	0.07	82.28	0.96	1
hCG1642024.3	233788	probe	184	62	1/ IVT	68.15	-0.14	0.06	68.15	7.15	1
hCG1642034.3	100348	probe	31	74	1/ IVT	214.15	0.35	0.17	214.15	2.83	1
hCG1642042.4	141171	probe	27	71	1/ IVT	267.78	-1.16	0.22	267.78	0.86	1
hCG1642045.3	395408	probe	151	147	1/ IVT	316.39	-0.49	0.28	316.39	2.03	1
hCG1642068.3	188013	probe	112	65	1/ IVT	133.6	-0.78	0.11	133.6	1.29	1
hCG1642097.2	171807	probe	29	8	1/ IVT	204.58	-1.85	0.17	204.58	0.54	1
hCG1642105.2	211262	probe	230	126	1/ IVT	3756.49	0.11	3.32	3756.49	8.76	1
hCG1642115.1	184569	probe	179	3	1/ IVT	174.63	-1.21	0.15	174.63	0.83	1
hCG1642124.3	229948	probe	105	65	1/ IVT	164	-1.57	0.13	164	0.64	1
hCG1642128.2	236184	probe	81	3	1/ IVT	323.97	-1.08	0.26	323.97	0.93	1
hCG1642147.2	146870	probe	170	74	1/ IVT	441.98	-0.66	0.39	441.98	1.52	1
hCG1642159.3	191607	probe	81	85	1/ IVT	194.19	-2.07	0.16	194.19	0.49	1
hCG1642160.4	174658	probe	166	150	1/ IVT	86.59	-2.49	0.08	86.59	0.4	1
hCG1642166.3	125040	probe	223	1	1/ IVT	115.14	0.46	0.1	115.14	2.17	1
hCG1642177.3	166572	probe	195	117	1/ IVT	51.54	-1.61	0.05	51.54	0.62	1
hCG1642178.2	213464	probe	206	63	1/ IVT	125.05	0.78	0.11	125.05	1.29	1
hCG1642187.3	168472	probe	144	126	1/ IVT	318.13	-1.71	0.28	318.13	0.59	1
hCG1642205.3	233676	probe	57	101	1/ IVT	131.93	-0.55	0.11	131.93	1.82	1
hCG1642210.3	138366	probe	172	57	1/ IVT	88.75	0.29	0.08	88.75	3.43	1
hCG1642212.3	233727	probe	72	82	1/ IVT	409.55	-1.04	0.33	409.55	0.96	1
hCG1642216.2	131671	probe	132	134	1/ IVT	387.61	-0.72	0.34	387.61	1.39	1
hCG1642221.4	131677	probe	97	15	1/ IVT	14380.6	0.54	11.73	14380.6	1.84	1
hCG1642258.3	10576549	probe	195	32	1/ IVT	164.86	0.63	0.15	164.86	1.58	1
hCG1642266.3	232864	probe	11	5	1/ IVT	590.51	-0.23	0.48	590.51	4.34	1
hCG1642271.3	133491	probe	116	134	1/ IVT	685.55	-1.56	0.56	685.55	0.64	1
hCG1642279.1	120256	probe	184	86	1/ IVT	233.43	-0.38	0.21	233.43	2.66	1
hCG1642295.3	104153	probe	23	9	1/ IVT	295.07	0.94	0.24	295.07	1.06	1
hCG1642305.1	231941	probe	112	1	1/ IVT	154.62	0.57	0.13	154.62	1.75	1
hCG1642306.3	183788	probe	215	149	1/ IVT	57.38	0.1	0.05	57.38	9.6	1
hCG1642311.3	196991	probe	97	71	1/ IVT	345.42	-0.88	0.28	345.42	1.14	1
hCG1642312.3	231781	probe	95	94	1/ IVT	152.76	0.49	0.12	152.76	2.03	1
hCG1642337.2	204019	probe	149	11	1/ IVT	206.1	1	0.18	206.1	1	1
hCG1642340.4	134859	probe	73	156	1/ IVT	164.77	-0.42	0.13	164.77	2.39	1
hCG1642341.3	182654	probe	32	131	1/ IVT	540.98	0.4	0.44	540.98	2.48	1
hCG1642346.2	134262	probe	46	97	1/ IVT	119.05	-1.17	0.1	119.05	0.86	1
hCG1642347.2	171300	probe	94	101	1/ IVT	153.49	0.94	0.13	153.49	1.07	1
hCG1642360.2	705287	probe	108	86	1/ IVT	1438.42	0.36	1.17	1438.42	2.77	1
hCG1642363.2	232822	probe	209	103	1/ IVT	279.65	0.3	0.25	279.65	3.32	1
hCG1642367.2	151582	probe	116	25	1/ IVT	272.37	0.49	0.22	272.37	2.02	1
hCG1642377.2	111860	probe	202	19	1/ IVT	144.44	-0.19	0.13	144.44	5.28	1
hCG1642390.4	227502	probe	38	70	1/ IVT	69.29	-1.49	0.06	69.29	0.67	1
hCG1642405.2	197133	probe	107	43	1/ IVT	156.85	-1.9	0.13	156.85	0.53	1
hCG1642412.2	117093	probe	178	5	1/ IVT	179.45	0.93	0.16	179.45	1.07	1
hCG1642418.3	129856	probe	198	88	1/ IVT	225.16	-2.1	0.2	225.16	0.48	1
hCG1642439.3	231576	probe	233	49	1/ IVT	183.63	-1.7	0.16	183.63	0.59	1
hCG1642443.3	139730	probe	95	41	1/ IVT	243.17	-1.88	0.2	243.17	0.53	1
hCG1642450.3	201398	probe	137	3	1/ IVT	320.27	0	0.28	320.27	300.44	1
hCG1642457.2	105852	probe	17	116	1/ IVT	316.03	-0.02	0.26	316.03	40.24	1
hCG1642463.4	162275	probe	33	85	1/ IVT	71.12	0.51	0.06	71.12	1.95	1
hCG1642464.3	100051	probe	75	157	1/ IVT	126.15	-2.32	0.1	126.15	0.43	1
hCG1642475.5	165126	probe	57	159	1/ IVT	159.59	0.37	0.13	159.59	2.69	1
hCG1642477.2	192350	probe	123	130	1/ IVT	542.34	0.97	0.48	542.34	1.03	1
hCG1642490.3	107082	probe	236	133	1/ IVT	685.76	-0.25	0.61	685.76	4.01	1
hCG1642518.2	197325	probe	14	102	1/ IVT	173.25	0.38	0.14	173.25	2.64	1
hCG1642538.2	183428	probe	199	113	1/ IVT	269.57	-1.49	0.24	269.57	0.67	1
hCG1642542.2	205633	probe	188	9	1/ IVT	306.65	0.31	0.27	306.65	3.2	1
hCG1642595.3	135095	probe	84	83	1/ IVT	176.03	-0.73	0.14	176.03	1.38	1
hCG1642598.4	106937	probe	111	70	1/ IVT	548.13	0.32	0.45	548.13	3.12	1
hCG1642624.1	229706	probe	223	77	1/ IVT	695.02	-0.53	0.61	695.02	1.9	1
hCG1642633.2	108761	probe	33	101	1/ IVT	198.66	0.75	0.16	198.66	1.33	1
hCG1642652.3	176572	probe	66	91	1/ IVT	181.67	0.2	0.15	181.67	4.99	1
hCG1642657.2	117842	probe	176	59	1/ IVT	121.44	0.38	0.11	121.44	2.6	1
hCG1642667.2	133664	probe	225	26	1/ IVT	326.05	-1.66	0.29	326.05	0.6	1
hCG1642668.3	191945	probe	98	14	1/ IVT	4379.46	-0.48	3.57	4379.46	2.09	1
hCG1642671.2	230186	probe	136	154	1/ IVT	134.29	0.1	0.12	134.29	10.25	1
hCG1642676.3	147526	probe	77	37	1/ IVT	175.77	0.95	0.14	175.77	1.06	1
hCG1642684.1	134981	probe	163	159	1/ IVT	201.89	0.52	0.18	201.89	1.94	1
hCG1642699.4	125758	probe	9	110	1/ IVT	462.71	0.43	0.38	462.71	2.3	1
hCG1642702.3	204825	probe	5	87	1/ IVT	116.35	-1.67	0.09	116.35	0.6	1
hCG1642726.2	225830	probe	233	135	1/ IVT	158.87	-0.88	0.14	158.87	1.14	1
hCG1642727.3	146451	probe	187	85	1/ IVT	137.64	0.87	0.12	137.64	1.15	1
hCG1642761.3	159767	probe	212	71	1/ IVT	98.94	-0.48	0.09	98.94	2.11	1
hCG1642776.3	122459	probe	94	28	1/ IVT	160.95	-1.52	0.13	160.95	0.66	1
hCG1642804.5	221580	probe	128	72	1/ IVT	1088.67	-0.29	0.96	1088.67	3.49	1
hCG1642819.3	127119	probe	225	32	1/ IVT	85.37	-0.42	0.08	85.37	2.37	1
hCG1642845.3	141796	probe	13	104	1/ IVT	167.49	-0.76	0.14	167.49	1.31	1
hCG1642860.1	175560	probe	35	134	1/ IVT	231.38	-1.44	0.19	231.38	0.7	1
hCG1642871.2	151665	probe	56	121	1/ IVT	208.74	-0.04	0.17	208.74	23.12	1
hCG1642874.2	159630	probe	226	45	1/ IVT	273.04	-0.04	0.24	273.04	24.87	1
hCG1642875.3	160373	probe	110	75	1/ IVT	141.77	0.01	0.12	141.77	84.37	1
hCG1642875.3	153152	probe	208	48	1/ IVT	327.94	-0.48	0.29	327.94	2.08	1
hCG1642880.4	143961	probe	141	93	1/ IVT	391.57	-0.31	0.35	391.57	3.2	1
hCG1642881.3	176391	probe	236	17	1/ IVT	203.86	-2.38	0.18	203.86	0.42	1
hCG1642884.1	139124	probe	239	137	1/ IVT	736.08	0.28	0.65	736.08	3.53	1
hCG1642889.2	141394	probe	198	57	1/ IVT	88.96	-2.31	0.08	88.96	0.43	1
hCG1642908.1	643348	probe	227	136	1/ IVT	125.86	0.75	0.11	125.86	1.34	1
hCG1642921.3	202356	probe	106	38	1/ IVT	179.29	-0.34	0.15	179.29	2.97	1
hCG1642941.3	483523	probe	26	121	1/ IVT	150.68	0.92	0.12	150.68	1.09	1
hCG1642987.3	228608	probe	46	104	1/ IVT	145.23	-1.03	0.12	145.23	0.97	1
hCG1643007.2	178123	probe	179	85	1/ IVT	116.68	0.56	0.1	116.68	1.78	1
hCG1643047.3	100160	probe	12	37	1/ IVT	171	-0.52	0.14	171	1.92	1
hCG1643048.4	233851	probe	42	147	1/ IVT	217.9	-0.41	0.18	217.9	2.44	1
hCG1643053.3	165204	probe	81	31	1/ IVT	166.6	0.63	0.14	166.6	1.58	1
hCG1643086.4	230058	probe	98	72	1/ IVT	112.26	-1.83	0.09	112.26	0.55	1
hCG1643088.2	133815	probe	3	24	1/ IVT	45.1	-1.69	0.04	45.1	0.59	1
hCG1643105.2	104523	probe	154	102	1/ IVT	179.57	-0.35	0.16	179.57	2.86	1
hCG1643126.2	228743	probe	71	144	1/ IVT	497.1	0.94	0.41	497.1	1.07	1
hCG1643153.3	186662	probe	114	41	1/ IVT	208.18	0.45	0.17	208.18	2.2	1
hCG1643163.2	189981	probe	147	141	1/ IVT	177.66	-1.6	0.16	177.66	0.63	1
hCG1643170.3	701325	probe	88	37	1/ IVT	208.46	0.55	0.17	208.46	1.81	1
hCG1643182.4	109488	probe	136	33	1/ IVT	874.14	-0.72	0.77	874.14	1.4	1
hCG1643197.4	236130	probe	150	98	1/ IVT	482.29	0.92	0.43	482.29	1.09	1
hCG1643218.3	222650	probe	178	51	1/ IVT	138.92	0.08	0.12	138.92	12.72	1
hCG1643239.2	159185	probe	182	132	1/ IVT	103.35	0.47	0.09	103.35	2.14	1
hCG1643272.4	225764	probe	219	6	1/ IVT	173.21	-0.26	0.15	173.21	3.9	1
hCG1643288.2	713009	probe	90	155	1/ IVT	479.31	0.14	0.39	479.31	7.22	1
hCG1643312.4	127029	probe	103	52	1/ IVT	116.67	-0.42	0.1	116.67	2.38	1
hCG1643319.3	221511	probe	22	51	1/ IVT	104.53	-1.35	0.09	104.53	0.74	1
hCG1643334.3	123211	probe	96	90	1/ IVT	196.96	0.6	0.16	196.96	1.65	1
hCG1643337.1	193526	probe	153	34	1/ IVT	240.1	0.52	0.21	240.1	1.91	1
hCG1643340.2	201781	probe	27	93	1/ IVT	286.37	-0.24	0.23	286.37	4.12	1
hCG1643344.2	100781	probe	3	9	1/ IVT	283.31	0.53	0.23	283.31	1.88	1
hCG1643353.3	157189	probe	104	38	1/ IVT	641.91	-0.06	0.52	641.91	17.34	1
hCG1643363.2	203432	probe	172	76	1/ IVT	544.09	0.53	0.48	544.09	1.89	1
hCG1643366.3	197272	probe	50	125	1/ IVT	195.35	0.65	0.16	195.35	1.53	1
hCG1643366.3	132890	probe	52	144	1/ IVT	113.02	-0.06	0.09	113.02	16.1	1
hCG1643366.3	222226	probe	225	14	1/ IVT	152.13	-0.74	0.13	152.13	1.34	1
hCG1643370.3	209214	probe	91	19	1/ IVT	273.81	-0.65	0.22	273.81	1.55	1
hCG1643372.2	215565	probe	190	136	1/ IVT	396.78	-0.14	0.35	396.78	7.36	1
hCG1643376.3	137184	probe	4	71	1/ IVT	1019.85	0.47	0.83	1019.85	2.14	1
hCG1643397.2	210546	probe	62	98	1/ IVT	174.67	-0.79	0.14	174.67	1.27	1
hCG1643399.2	179036	probe	111	71	1/ IVT	2207.03	0.75	1.8	2207.03	1.33	1
hCG1643411.1	228494	probe	84	85	1/ IVT	627.55	-0.79	0.51	627.55	1.26	1
hCG1643426.4	502746	probe	82	17	1/ IVT	212.04	0.36	0.17	212.04	2.75	1
hCG1643453.2	122980	probe	88	3	1/ IVT	195.31	-0.28	0.16	195.31	3.57	1
hCG1643480.2	123611	probe	7	84	1/ IVT	208.08	-1.06	0.17	208.08	0.95	1
hCG1643489.3	231412	probe	21	89	1/ IVT	275.53	0.66	0.22	275.53	1.52	1
hCG1643496.4	228246	probe	89	133	1/ IVT	372.33	0.51	0.3	372.33	1.95	1
hCG1643554.2	232722	probe	82	1	1/ IVT	427	-0.3	0.35	427	3.33	1
hCG1643563.2	210875	probe	61	77	1/ IVT	179.87	-1.78	0.15	179.87	0.56	1
hCG1643596.4	205030	probe	209	93	1/ IVT	1819.03	-0.42	1.61	1819.03	2.38	1
hCG1643600.4	172723	probe	69	83	1/ IVT	258.47	-0.1	0.21	258.47	10.3	1
hCG1643600.4	139359	probe	123	149	1/ IVT	199.52	0.38	0.18	199.52	2.6	1
hCG1643608.3	704807	probe	118	149	1/ IVT	208.44	-0.52	0.17	208.44	1.94	1
hCG1643615.3	153194	probe	209	142	1/ IVT	80.35	0.49	0.07	80.35	2.04	1
hCG1643626.2	198456	probe	187	144	1/ IVT	82.11	-0.33	0.07	82.11	3.08	1
hCG1643642.3	662056	probe	7	96	1/ IVT	121.4	-0.13	0.1	121.4	7.41	1
hCG1643655.3	232084	probe	14	142	1/ IVT	549.62	-0.2	0.45	549.62	4.99	1
hCG1643669.1	142739	probe	95	127	1/ IVT	254.7	0.96	0.21	254.7	1.04	1
hCG1643699.2	142293	probe	127	46	1/ IVT	245.11	-1.25	0.22	245.11	0.8	1
hCG1643718.4	176143	probe	208	102	1/ IVT	150.07	0.29	0.13	150.07	3.5	1
hCG1643724.2	230376	probe	37	156	1/ IVT	260.3	-0.54	0.21	260.3	1.86	1
hCG16438.3	126617	probe	99	2	1/ IVT	172.1	-0.32	0.14	172.1	3.15	1
hCG1643819.3	230858	probe	86	49	1/ IVT	247.97	-1.06	0.2	247.97	0.95	1
hCG1643829.3	135914	probe	78	82	1/ IVT	182.04	0.53	0.15	182.04	1.9	1
hCG1643830.4	184567	probe	54	72	1/ IVT	275.72	-0.72	0.22	275.72	1.38	1
hCG1643845.3	186227	probe	223	142	1/ IVT	488.41	0.02	0.43	488.41	48.12	1
hCG1643854.3	209715	probe	11	149	1/ IVT	1488.32	-1.67	1.21	1488.32	0.6	1
hCG1643857.4	187444	probe	64	4	1/ IVT	67.05	-2.62	0.05	67.05	0.38	1
hCG1643858.2	165448	probe	170	105	1/ IVT	165.2	0.47	0.15	165.2	2.12	1
hCG1643866.3	170547	probe	66	55	1/ IVT	243.46	-0.09	0.2	243.46	11.64	1
hCG1643878.3	171591	probe	143	89	1/ IVT	202.94	-1.81	0.18	202.94	0.55	1
hCG1643915.3	128690	probe	186	132	1/ IVT	185.21	0.8	0.16	185.21	1.25	1
hCG1643937.3	205172	probe	56	48	1/ IVT	157.72	0.41	0.13	157.72	2.43	1
hCG1643952.2	115252	probe	90	156	1/ IVT	741.44	-1.12	0.6	741.44	0.9	1
hCG1643976.3	161476	probe	94	81	1/ IVT	462.23	0.15	0.38	462.23	6.57	1
hCG1643984.3	131247	probe	11	11	1/ IVT	2403.38	-1.18	1.96	2403.38	0.85	1
hCG1644009.2	178778	probe	27	153	1/ IVT	238.41	0.15	0.19	238.41	6.79	1
hCG1644010.3	170063	probe	239	147	1/ IVT	207.35	0.08	0.18	207.35	13.09	1
hCG1644011.2	135005	probe	82	86	1/ IVT	151.38	0.18	0.12	151.38	5.6	1
hCG1644025.2	228262	probe	35	87	1/ IVT	145.53	0.01	0.12	145.53	91.99	1
hCG1644029.4	231345	probe	147	3	1/ IVT	272.82	-0.97	0.24	272.82	1.03	1
hCG1644048.2	125308	probe	166	115	1/ IVT	245.38	0.45	0.22	245.38	2.21	1
hCG1644049.3	129123	probe	141	149	1/ IVT	94.56	-1.58	0.08	94.56	0.63	1
hCG1644052.4	102700	probe	132	23	1/ IVT	73.09	-0.83	0.06	73.09	1.2	1
hCG1644058.2	123625	probe	169	4	1/ IVT	96.92	-1.32	0.09	96.92	0.76	1
hCG1644088.2	122848	probe	162	104	1/ IVT	245.11	-1.24	0.22	245.11	0.81	1
hCG1644096.2	136854	probe	121	93	1/ IVT	155.17	0.99	0.14	155.17	1.01	1
hCG1644101.3	129649	probe	26	138	1/ IVT	89.48	0.96	0.07	89.48	1.04	1
hCG1644112.3	138956	probe	209	86	1/ IVT	563.6	-0.04	0.5	563.6	26.08	1
hCG1644124.3	129131	probe	202	4	1/ IVT	100.47	-1.46	0.09	100.47	0.69	1
hCG1644127.3	232168	probe	21	53	1/ IVT	162.78	-1.78	0.13	162.78	0.56	1
hCG1644135.3	236243	probe	11	134	1/ IVT	827.36	-0.49	0.67	827.36	2.04	1
hCG1644165.2	113582	probe	121	95	1/ IVT	383.9	-1.66	0.34	383.9	0.6	1
hCG1644176.2	191928	probe	53	97	1/ IVT	295.55	0.42	0.24	295.55	2.39	1
hCG1644186.3	209791	probe	124	112	1/ IVT	149.96	-2.06	0.13	149.96	0.49	1
hCG1644199.2	189042	probe	54	118	1/ IVT	417.78	0.48	0.34	417.78	2.08	1
hCG1644201.2	201761	probe	126	157	1/ IVT	159.34	-0.04	0.14	159.34	25.37	1
hCG1644206.3	304646	probe	232	119	1/ IVT	103.74	-0.83	0.09	103.74	1.21	1
hCG1644217.3	233010	probe	36	6	1/ IVT	207.06	-0.55	0.17	207.06	1.83	1
hCG1644227.2	118630	probe	229	59	1/ IVT	97.24	0.37	0.09	97.24	2.73	1
hCG1644232.3	126877	probe	26	70	1/ IVT	239.44	0.91	0.2	239.44	1.09	1
hCG1644232.3	172753	probe	184	44	1/ IVT	120.57	-0.81	0.11	120.57	1.23	1
hCG1644233.2	232988	probe	43	15	1/ IVT	177.51	-1.04	0.14	177.51	0.96	1
hCG1644239.2	231085	probe	177	95	1/ IVT	149.62	0.19	0.13	149.62	5.27	1
hCG1644250.3	105114	probe	214	125	1/ IVT	91.41	-0.95	0.08	91.41	1.06	1
hCG1644256.3	234080	probe	192	45	1/ IVT	136.23	-0.17	0.12	136.23	5.81	1
hCG1644259.4	180904	probe	17	28	1/ IVT	334.19	0.32	0.27	334.19	3.13	1
hCG1644260.2	148256	probe	206	90	1/ IVT	109.99	0.02	0.1	109.99	46.05	1
hCG1644292.3	118927	probe	102	150	1/ IVT	219.45	-0.41	0.18	219.45	2.43	1
hCG1644294.4	196121	probe	219	155	1/ IVT	453.58	-0.92	0.4	453.58	1.09	1
hCG1644306.3	696496	probe	192	144	1/ IVT	133.64	-1.39	0.12	133.64	0.72	1
hCG1644315.2	106505	probe	22	107	1/ IVT	150.56	0.63	0.12	150.56	1.6	1
hCG1644317.4	122916	probe	113	101	1/ IVT	271.46	0.86	0.22	271.46	1.16	1
hCG1644325.2	229600	probe	139	34	1/ IVT	394.86	0.42	0.35	394.86	2.38	1
hCG1644354.3	205259	probe	147	97	1/ IVT	243.94	-0.39	0.22	243.94	2.58	1
hCG1644362.2	187982	probe	205	134	1/ IVT	161.69	0.93	0.14	161.69	1.08	1
hCG1644389.4	200589	probe	146	156	1/ IVT	197.42	0.44	0.17	197.42	2.29	1
hCG1644411.2	149351	probe	162	108	1/ IVT	187.92	-0.06	0.17	187.92	16.41	1
hCG1644444.3	160901	probe	178	93	1/ IVT	162.2	0.43	0.14	162.2	2.33	1
hCG1644478.3	110706	probe	49	16	1/ IVT	104.95	-0.33	0.09	104.95	3.04	1
hCG1644482.2	130282	probe	122	131	1/ IVT	259.83	-0.82	0.23	259.83	1.22	1
hCG1644487.3	207548	probe	116	98	1/ IVT	144.52	0.8	0.12	144.52	1.26	1
hCG16445.2	166727	probe	212	119	1/ IVT	114.65	-0.14	0.1	114.65	6.95	1
hCG1644536.3	122363	probe	168	24	1/ IVT	115.14	0.85	0.1	115.14	1.18	1
hCG1644536.3	225126	probe	222	46	1/ IVT	147.86	-1.95	0.13	147.86	0.51	1
hCG1644557.2	165441	probe	49	8	1/ IVT	166.31	-0.24	0.14	166.31	4.21	1
hCG1644578.2	118728	probe	13	92	1/ IVT	199.04	-0.35	0.16	199.04	2.82	1
hCG1644593.3	210835	probe	103	149	1/ IVT	192.27	-0.18	0.16	192.27	5.67	1
hCG1644623.3	188230	probe	169	102	1/ IVT	140.72	0.8	0.12	140.72	1.25	1
hCG1644640.4	165469	probe	196	3	1/ IVT	424.99	-0.52	0.38	424.99	1.92	1
hCG1644657.3	184179	probe	46	65	1/ IVT	846.74	0.97	0.69	846.74	1.04	1
hCG1644671.3	158966	probe	61	47	1/ IVT	146.1	-0.14	0.12	146.1	7	1
hCG1644675.3	147061	probe	65	75	1/ IVT	159.64	-0.45	0.13	159.64	2.21	1
hCG1644755.2	169413	probe	163	35	1/ IVT	541.22	0.66	0.48	541.22	1.51	1
hCG1644800.3	108893	probe	227	94	1/ IVT	210.37	0.63	0.19	210.37	1.58	1
hCG1644833.3	313796	probe	73	81	1/ IVT	356.95	0.35	0.29	356.95	2.83	1
hCG1644834.3	181287	probe	36	28	1/ IVT	345.22	0.21	0.28	345.22	4.81	1
hCG1644834.3	159948	probe	134	101	1/ IVT	314.44	0.6	0.28	314.44	1.66	1
hCG1644839.2	194437	probe	138	56	1/ IVT	386.9	-2.81	0.34	386.9	0.36	1
hCG1644840.2	183533	probe	223	22	1/ IVT	25.78	-0.8	0.02	25.78	1.25	1
hCG1644841.5	184330	probe	63	98	1/ IVT	155.9	0.02	0.13	155.9	42.01	1
hCG1644856.3	186640	probe	92	142	1/ IVT	234.13	-0.56	0.19	234.13	1.78	1
hCG1644864.1	182264	probe	153	56	1/ IVT	213.64	-0.15	0.19	213.64	6.56	1
hCG1644877.3	149878	probe	214	89	1/ IVT	1198.06	-1.24	1.06	1198.06	0.81	1
hCG1644878.3	208850	probe	206	29	1/ IVT	145.24	0.17	0.13	145.24	5.82	1
hCG1644884.3	130761	probe	72	66	1/ IVT	137.3	-0.24	0.11	137.3	4.12	1
hCG1644884.3	185509	probe	186	123	1/ IVT	195.83	-0.98	0.17	195.83	1.02	1
hCG1644885.2	112205	probe	53	118	1/ IVT	407.55	0.81	0.33	407.55	1.23	1
hCG1644931.2	185381	probe	199	74	1/ IVT	152.21	0.04	0.13	152.21	25.7	1
hCG1644950.2	197815	probe	218	78	1/ IVT	214.45	0.37	0.19	214.45	2.72	1
hCG1644951.3	175514	probe	231	111	1/ IVT	830.86	0.4	0.73	830.86	2.53	1
hCG1645014.3	139959	probe	202	10	1/ IVT	82.89	-2.88	0.07	82.89	0.35	1
hCG1645031.1	133241	probe	156	124	1/ IVT	110.88	-1.17	0.1	110.88	0.85	1
hCG1645038.3	104273	probe	239	152	1/ IVT	169.17	-0.19	0.15	169.17	5.27	1
hCG1645045.1	156109	probe	83	83	1/ IVT	241.24	0.78	0.2	241.24	1.28	1
hCG1645046.1	210751	probe	182	110	1/ IVT	52.71	0.14	0.05	52.71	7.27	1
hCG1645048.2	215837	probe	221	132	1/ IVT	81.98	-0.2	0.07	81.98	5.03	1
hCG1645061.3	127229	probe	143	132	1/ IVT	172.59	-0.33	0.15	172.59	2.99	1
hCG1645071.3	156211	probe	29	104	1/ IVT	157.2	0.7	0.13	157.2	1.43	1
hCG1645078.2	168843	probe	132	116	1/ IVT	110.6	0.31	0.1	110.6	3.23	1
hCG1645086.2	602392	probe	56	17	1/ IVT	208.16	-1.77	0.17	208.16	0.56	1
hCG1645093.3	183890	probe	94	131	1/ IVT	376.41	0.73	0.31	376.41	1.37	1
hCG1645105.3	146218	probe	217	92	1/ IVT	577.31	0.99	0.51	577.31	1.01	1
hCG1645112.3	171197	probe	98	110	1/ IVT	154.82	-0.7	0.13	154.82	1.43	1
hCG1645112.3	156951	probe	137	2	1/ IVT	226.65	0.12	0.2	226.65	8.27	1
hCG1645124.2	117934	probe	62	108	1/ IVT	175.09	-1.1	0.14	175.09	0.91	1
hCG1645126.3	168543	probe	64	50	1/ IVT	203.37	-0.3	0.17	203.37	3.28	1
hCG1645130.3	200192	probe	126	93	1/ IVT	220.32	0.89	0.19	220.32	1.13	1
hCG1645155.3	191591	probe	123	53	1/ IVT	61.54	-1.87	0.05	61.54	0.54	1
hCG1645163.3	124918	probe	13	75	1/ IVT	200.18	-0.03	0.16	200.18	39.38	1
hCG1645172.1	115153	probe	135	89	1/ IVT	260.8	0.26	0.23	260.8	3.89	1
hCG1645173.3	144362	probe	37	114	1/ IVT	97.4	-0.41	0.08	97.4	2.44	1
hCG1645175.2	185712	probe	149	30	1/ IVT	893.2	-0.2	0.79	893.2	4.91	1
hCG1645185.4	193021	probe	99	47	1/ IVT	238.98	0.63	0.19	238.98	1.59	1
hCG1645208.3	199780	probe	176	150	1/ IVT	385.82	0.74	0.34	385.82	1.36	1
hCG1645212.1	167051	probe	34	76	1/ IVT	182.81	0.17	0.15	182.81	5.72	1
hCG1645221.4	186136	probe	6	35	1/ IVT	114.2	0.43	0.09	114.2	2.33	1
hCG1645235.2	131225	probe	55	154	1/ IVT	191.65	0.13	0.16	191.65	7.97	1
hCG1645259.2	143521	probe	72	49	1/ IVT	268.75	0.78	0.22	268.75	1.28	1
hCG1645266.3	229638	probe	2	110	1/ IVT	168.3	0.99	0.14	168.3	1.01	1
hCG1645306.2	119303	probe	154	150	1/ IVT	476.76	0.35	0.42	476.76	2.82	1
hCG1645324.3	159972	probe	85	152	1/ IVT	1741.79	0.38	1.42	1741.79	2.62	1
hCG1645372.3	191854	probe	12	102	1/ IVT	152.91	0.14	0.12	152.91	6.97	1
hCG1645384.4	167536	probe	119	90	1/ IVT	229.95	-0.16	0.19	229.95	6.23	1
hCG1645388.3	148466	probe	97	58	1/ IVT	371.3	0.41	0.3	371.3	2.41	1
hCG1645397.3	179526	probe	34	95	1/ IVT	218.06	-0.28	0.18	218.06	3.54	1
hCG1645405.2	214339	probe	54	8	1/ IVT	922.04	-0.33	0.75	922.04	3.04	1
hCG1645413.3	156935	probe	82	136	1/ IVT	153.85	0.4	0.13	153.85	2.47	1
hCG1645418.3	143296	probe	30	137	1/ IVT	380.63	0.23	0.31	380.63	4.3	1
hCG1645429.2	156851	probe	33	92	1/ IVT	169.01	0.58	0.14	169.01	1.73	1
hCG1645441.3	166858	probe	194	113	1/ IVT	215.22	-2.31	0.19	215.22	0.44	1
hCG1645445.3	145856	probe	2	71	1/ IVT	3566.04	-0.29	2.91	3566.04	3.45	1
hCG1645461.3	669628	probe	230	9	1/ IVT	384.79	0.32	0.34	384.79	3.17	1
hCG1645492.1	169257	probe	72	73	1/ IVT	210.94	0.73	0.17	210.94	1.38	1
hCG16455.2	149051	probe	238	59	1/ IVT	237.64	-0.35	0.21	237.64	2.83	1
hCG1645516.2	700840	probe	95	62	1/ IVT	187.95	0.57	0.15	187.95	1.76	1
hCG1645548.2	109270	probe	9	119	1/ IVT	344.84	0.97	0.28	344.84	1.03	1
hCG1645558.3	205962	probe	137	51	1/ IVT	1114.18	-0.98	0.98	1114.18	1.02	1
hCG1645559.3	595395	probe	191	27	1/ IVT	73.25	-1.48	0.06	73.25	0.68	1
hCG1645578.3	163690	probe	228	36	1/ IVT	82.61	0.39	0.07	82.61	2.56	1
hCG1645613.2	204201	probe	147	85	1/ IVT	242.56	0.3	0.21	242.56	3.3	1
hCG1645642.2	114141	probe	181	127	1/ IVT	301.02	0.88	0.27	301.02	1.14	1
hCG1645671.3	542725	probe	109	22	1/ IVT	106.73	-1.34	0.09	106.73	0.74	1
hCG1645679.2	167377	probe	103	115	1/ IVT	219.89	-0.13	0.18	219.89	7.89	1
hCG1645691.3	153081	probe	191	49	1/ IVT	171.63	-0.2	0.15	171.63	4.9	1
hCG1645727.1	148536	probe	209	34	1/ IVT	296.56	0.29	0.26	296.56	3.4	1
hCG1645741.2	130628	probe	143	126	1/ IVT	1197.68	0.48	1.06	1197.68	2.08	1
hCG1645743.2	121600	probe	44	33	1/ IVT	332.04	-0.23	0.27	332.04	4.34	1
hCG1645744.2	117083	probe	51	105	1/ IVT	210.26	0.51	0.17	210.26	1.95	1
hCG1645746.3	148656	probe	236	137	1/ IVT	415.7	-0.01	0.37	415.7	69.39	1
hCG1645750.3	566599	probe	130	69	1/ IVT	208.74	0.26	0.18	208.74	3.88	1
hCG1645775.2	233898	probe	72	126	1/ IVT	501.27	-0.23	0.41	501.27	4.28	1
hCG1645784.3	131428	probe	48	39	1/ IVT	529.87	-0.63	0.43	529.87	1.59	1
hCG1645785.3	173064	probe	17	31	1/ IVT	566.45	-2.17	0.46	566.45	0.46	1
hCG1645807.2	147233	probe	161	146	1/ IVT	609.49	0.3	0.54	609.49	3.34	1
hCG1645808.3	186555	probe	42	79	1/ IVT	312.18	-0.71	0.25	312.18	1.4	1
hCG1645817.4	214862	probe	121	17	1/ IVT	182.64	0.4	0.16	182.64	2.51	1
hCG1645842.4	170288	probe	169	41	1/ IVT	129.68	-2.27	0.11	129.68	0.44	1
hCG1645854.3	706352	probe	58	124	1/ IVT	148.25	0.09	0.12	148.25	10.79	1
hCG1645872.2	100727	probe	218	158	1/ IVT	306.46	-1.07	0.27	306.46	0.93	1
hCG1645946.3	112921	probe	162	9	1/ IVT	167.81	-0.05	0.15	167.81	20.08	1
hCG1645965.2	193932	probe	165	131	1/ IVT	169.8	-2.31	0.15	169.8	0.44	1
hCG1646000.2	230962	probe	206	118	1/ IVT	155.51	0.27	0.14	155.51	3.74	1
hCG1646016.3	137635	probe	101	123	1/ IVT	182.19	-0.02	0.15	182.19	55.23	1
hCG1646024.3	128864	probe	215	129	1/ IVT	48.14	-1.9	0.04	48.14	0.53	1
hCG1646036.2	177360	probe	59	144	1/ IVT	167.33	-0.7	0.14	167.33	1.44	1
hCG1646049.3	197592	probe	102	117	1/ IVT	224.89	0.16	0.18	224.89	6.24	1
hCG1646064.3	108582	probe	17	146	1/ IVT	121.83	-0.58	0.1	121.83	1.74	1
hCG1646080.4	229558	probe	75	129	1/ IVT	146.38	-0.2	0.12	146.38	5	1
hCG1646085.2	132086	probe	114	148	1/ IVT	240.73	-0.33	0.2	240.73	3.01	1
hCG1646086.2	123598	probe	41	7	1/ IVT	352.6	-0.76	0.29	352.6	1.32	1
hCG1646157.2	119042	probe	7	73	1/ IVT	261.7	0.72	0.21	261.7	1.4	1
hCG1646160.2	196129	probe	236	145	1/ IVT	89.36	-0.78	0.08	89.36	1.29	1
hCG1646163.3	204936	probe	91	49	1/ IVT	262.67	0.74	0.21	262.67	1.35	1
hCG1646178.3	234343	probe	14	155	1/ IVT	152.67	0.99	0.12	152.67	1.01	1
hCG1646184.3	126636	probe	142	119	1/ IVT	159.27	-0.04	0.14	159.27	24.5	1
hCG1646208.3	205339	probe	86	159	1/ IVT	300.6	0.82	0.25	300.6	1.23	1
hCG1646223.3	103403	probe	35	32	1/ IVT	283.99	0.52	0.23	283.99	1.91	1
hCG1646231.2	159867	probe	48	79	1/ IVT	188.85	0.72	0.15	188.85	1.39	1
hCG1646254.2	227351	probe	129	18	1/ IVT	389.16	-0.14	0.34	389.16	6.99	1
hCG1646254.2	234454	probe	233	145	1/ IVT	326.96	-1.14	0.29	326.96	0.87	1
hCG1646278.3	121134	probe	107	32	1/ IVT	166.51	-0.69	0.14	166.51	1.45	1
hCG1646279.1	128044	probe	19	8	1/ IVT	180.48	0.25	0.15	180.48	3.99	1
hCG1646286.3	229673	probe	224	91	1/ IVT	120.09	-0.28	0.11	120.09	3.57	1
hCG1646296.2	119554	probe	46	19	1/ IVT	1446.97	0.33	1.18	1446.97	3.01	1
hCG1646310.3	231665	probe	134	22	1/ IVT	828.76	0.69	0.73	828.76	1.46	1
hCG1646313.3	124710	probe	145	75	1/ IVT	136.84	-0.28	0.12	136.84	3.57	1
hCG1646318.3	173769	probe	14	93	1/ IVT	126.69	-0.47	0.1	126.69	2.15	1
hCG1646326.1	158589	probe	204	116	1/ IVT	176.94	-0.35	0.16	176.94	2.83	1
hCG1646329.2	103640	probe	58	11	1/ IVT	142.34	0.19	0.12	142.34	5.4	1
hCG1646345.4	102834	probe	172	72	1/ IVT	138.01	0.3	0.12	138.01	3.33	1
hCG1646346.4	187428	probe	12	39	1/ IVT	264.42	0.21	0.22	264.42	4.8	1
hCG1646368.2	200117	probe	118	56	1/ IVT	203.38	0.57	0.17	203.38	1.75	1
hCG1646381.3	139025	probe	54	156	1/ IVT	107.79	0.84	0.09	107.79	1.19	1
hCG1646384.3	184298	probe	121	114	1/ IVT	192.47	-1.85	0.17	192.47	0.54	1
hCG1646403.3	159965	probe	201	72	1/ IVT	116.4	0.37	0.1	116.4	2.72	1
hCG1646445.3	122180	probe	174	151	1/ IVT	125.19	-2.05	0.11	125.19	0.49	1
hCG1646462.2	171335	probe	184	3	1/ IVT	312.34	-2	0.28	312.34	0.5	1
hCG1646469.2	105886	probe	78	115	1/ IVT	139.87	0.31	0.11	139.87	3.2	1
hCG1646471.3	116592	probe	168	4	1/ IVT	166.28	0.64	0.15	166.28	1.57	1
hCG1646477.3	372877	probe	178	104	1/ IVT	208.2	-0.05	0.18	208.2	21.31	1
hCG1646491.2	142946	probe	18	148	1/ IVT	180.26	-0.36	0.15	180.26	2.8	1
hCG1646493.3	130673	probe	169	150	1/ IVT	664.17	-0.17	0.59	664.17	5.89	1
hCG1646498.2	180360	probe	146	91	1/ IVT	216.52	-0.61	0.19	216.52	1.63	1
hCG1646520.1	181227	probe	26	62	1/ IVT	135.03	-1.96	0.11	135.03	0.51	1
hCG1646528.3	181677	probe	116	19	1/ IVT	166.09	0.71	0.14	166.09	1.41	1
hCG1646561.3	152222	probe	62	96	1/ IVT	195.86	0.35	0.16	195.86	2.83	1
hCG1646570.2	131440	probe	190	55	1/ IVT	865.59	-0.46	0.76	865.59	2.17	1
hCG1646587.3	232145	probe	31	146	1/ IVT	124.09	0.05	0.1	124.09	19.85	1
hCG1646597.2	170674	probe	223	152	1/ IVT	82.04	-0.77	0.07	82.04	1.31	1
hCG1646600.2	226707	probe	95	109	1/ IVT	251.87	0.95	0.21	251.87	1.05	1
hCG1646605.3	210643	probe	155	5	1/ IVT	254.96	-2.68	0.23	254.96	0.38	1
hCG1646608.3	123778	probe	171	3	1/ IVT	197.22	-0.4	0.17	197.22	2.52	1
hCG1646627.3	204913	probe	209	73	1/ IVT	91.62	-0.63	0.08	91.62	1.6	1
hCG1646651.3	183394	probe	156	139	1/ IVT	50.77	-1.36	0.04	50.77	0.74	1
hCG1646665.2	118583	probe	204	152	1/ IVT	124.33	-0.13	0.11	124.33	8	1
hCG1646666.3	146200	probe	235	26	1/ IVT	91.84	0.12	0.08	91.84	8.11	1
hCG1646674.2	208454	probe	59	37	1/ IVT	303.37	0.26	0.25	303.37	3.9	1
hCG1646678.1	156824	probe	106	123	1/ IVT	1076.45	-0.3	0.88	1076.45	3.33	1
hCG1646690.3	112799	probe	206	45	1/ IVT	169.4	-1.66	0.15	169.4	0.6	1
hCG1646697.3	407091	probe	32	43	1/ IVT	240.83	0.98	0.2	240.83	1.02	1
hCG1646700.3	229077	probe	85	143	1/ IVT	218.41	0.65	0.18	218.41	1.53	1
[truncated: 31,189 more rows]

## Sheet: bad SN flagged
GENE_ID	PROBE_ID	raw SIGNAL	S/N	HB0055A NORMALIZED_SIGNAL	HB0055A SDEV	HB0055A CV	HB0055A FLAGS	GeneSpring FLAGS
[truncated: 32,740 more rows]

[truncated: 1 more sheets: present flags for copy]
