# Supplementary material for: Identification of a Tumor Cell Associated Type I IFN Resistance Gene Expression Signature of Human Melanoma, the Components of Which Have a Predictive Potential for Immunotherapy
Source: Int J Mol Sci. 2022 Feb 28;23(5):2704. doi: 10.3390/ijms23052704 (PMC8911010; doi:10.3390/ijms23052704)
Supplement: Supplementary file 1 [file ijms-23-02704-s001.zip › Table S2.xlsx]

## Sheet: Munka1
Table S2. Non-IRGs of the 79 DEGs in IFN resistant vs. sensitive melanoma cells
Assay ID	Fold change	Gene Symbol			RefSeq
Hs00221849_m1	15.21	WFDC1	WAP four-disulfide core domain 1		NM_012232.6
Hs00275620_m1	9.015	GAGE2C	G antigen 2		NR_026881
Hs00191913_m1	6.1534	EFNA3	ephrin-A3; EFL2, EPLG3,Ehk1-L,HGNC:3223,LERK3		NM_001256374.1
Hs00757122_m1	5.3656	DDX10	DEAD (Asp-Glu-Ala-Asp) box polypeptide 10		NM_016508.4
Hs00171699_m1	4.963	WNT7A	WNT7A wingless-type MMTV integration site family, member 7A		NM_014212.4
Hs00219905_m1	4.7162	ABCC1	ATP-binding cassette, sub-family C (CFTR/MRP), member 1		NM_144658.4
Hs00195582_m1	4.3842	S100A2	S100 calcium binding protein A2		NM_001548.5
Hs00396859_m1	4.298	PTRF/CAVIN1	Polymerase I and transcript release factor		NM_015558
Hs00160444_m1	3.979	PRG1	Proteoglycan 1, secretory granule		NM_053039.2
Hs00232134_m1	3.8076	HSF1	heat shock transcription factor 1		NM_001290060.2
Hs00166495_m1	3.7025	PDE6A	phosphodiesterase 6A, cGMP-specific, rod, alpha		NM_005458.8
Hs00205296_m1	3.536	HSPB7	heat shock 27kDa protein family, member 7 (cardiovascular)		NM_004334.3
Hs00263581_m1	3.51	SYDE1	synapse defective 1, Rho GTPase, homolog 1 (C. elegans)		NM_006798.1
Hs00290839_m1	3.286	LOC256021	Hypothetical protein LOC256021		NM_002462.5
Hs00167051_m1	3.112	TYRP1	tyrosinase-related protein 1		NM_003287.4
Hs00368816_m1	3.091	EFHD1	EF-hand domain family, member D1		NM_030948.6
Hs00917666_m1	3.0649	PDE9A	phosphodiesterase 9A		NM_198578.4
Hs00270914_m1	2.923	CALM3	Calmodulin 3 (phosphorylase kinase, delta)		NM_012242.4
Hs00265647_s1	2.84	SSTR5	somatostatin receptor 5		NM_021197.4
Hs00165642_m1	2.818	RPE65	retinal pigment epithelium-specific protein 65kDa		NM_025202.4
Hs00166421_m1	2.658	NEU1	Homo sapiens neuraminidase 1		NM_005184.4
Hs00213491_m1	2.546	MAPT	Microtubule-associated protein tau		NM_001848.3
Hs00179636_m1	2.487	CDKL3	cyclin-dependent kinase-like 3		NM_030945.4
Hs00157974_m1	2.487	HOXD10	homeobox D10		NM_002998.4
Hs00287662_m1	2.39	TTTY2	testis-specific transcript, Y-linked 2		NM_000329.2
Hs00192700_m1	2.359	SLC27A4	solute carrier family 27 (fatty acid transporter), member 4		NM_001134709.2
Hs00204415_m1	2.34	HOXC11	Homeo box C11		NM_000434.4
Hs00222588_m1	2.237	BCORL1	BCL6 co-repressor-like 1		NM_005094.3
Hs00219505_m1	2.234	HES2	hes family bHLH transcription factor 2		NM_001317237.2
Hs00225846_m1	2.214	NOX5	NADPH oxidase, EF-hand calcium binding domain 5		NM_004625.4
Hs00242448_m1	2.195	COL6A1	Collagen, type VI, alpha 1		NM_004996.4
Hs00376176_m1	2.076	DOCK11	dedicator of cytokinesis 11		NM_005345.6
Hs00229569_m1	2.064	C1QTNF3;C1QTNF3-AMACR	C1q and tumor necrosis factor related protein 3		NM_001001567.2
Hs00539314_m1	0.468	SS18L1	synovial sarcoma translocation gene on chromosome 18-like 1		NM_003656.5
Hs00299807_m1	0.468	SDC2	Syndecan 2 (heparan sulfate proteoglycan 1, cell surface-associated, fibroglycan)		NM_000378.6
Hs00852540_s1	0.444	UGT2B28	UDP glucuronosyltransferase 2 family, polypeptide B28		NM_001166418.2
Hs00190328_m1	0.405	SEMA3B	Homo sapiens semaphorin 3B (SEMA3B)		NM_000175.5
Hs00180099_m1	0.392	TPD52L1	Tumor protein D52-like 1		NM_021948.5
Hs00193804_m1	0.387	GPR51 = GABBR2	G protein-coupled receptor 51		NM_001305.4
Hs00174709_m1	0.378	BST1	bone marrow stromal cell antigen 1		NM_003107.2
Hs00792016_m1	0.359	UGT2A1	UDP glucuronosyltransferase 2 family, polypeptide A1		NM_012320.4
Hs00202399_m1	0.3574	(LYPLA3) PLA2G15	phospholipase A2 group XV		NM_000438.6
Hs00367639_m1	0.3227	SGK2	serum/glucocorticoid regulated kinase 2		NM_003810.4
Hs00533616_s1	0.2885	CLDN4	claudin 4		NM_003356.4
Hs00261949_s1	0.2851	BEHAB/BCAN	brevican, BEHAB,CSPG7,HGNC:23059,MGC13038		NM_019851.3
Hs00286959_m1	0.281	PHACTR1	phosphatase and actin regulator 1		NM_018337.4
Hs00971780_g1	0.2567	EZF-2 (ZNF444)	zinc finger protein 444		NM_004398.3
Hs00602749_m1	0.2567	ZIC1	Zic family member 1 (odd-paired homolog, Drosophila)		NM_000550.2
Hs00218503_m1	0.2372	HDAC8	histone deacetylase 8		NM_018431.5
Hs00411197_m1	0.231	LRRK2	leucine-rich repeat kinase 2		NM_001135047.2
Hs00240913_m1	0.2225	WT1	Wilms tumor 1		NM_001964.2
Hs00173929_m1	0.2165	FGF20	fibroblast growth factor 20		NM_002148.3
Hs00183740_m1	0.195	DKK1	dickkopf WNT signaling pathway inhibitor 1		NM_002199.3
Hs00198361_m1	0.1864	SLC17A3	solute carrier family 17 (sodium phosphate), member 3		NM_024505.3
Hs00738537_m1	0.1023	PTBP1	polypyrimidine tract binding protein 1		NM_006096.3
