# Supplementary material for: Identification of a Tumor Cell Associated Type I IFN Resistance Gene Expression Signature of Human Melanoma, the Components of Which Have a Predictive Potential for Immunotherapy
Source: Int J Mol Sci. 2022 Feb 28;23(5):2704. doi: 10.3390/ijms23052704 (PMC8911010; doi:10.3390/ijms23052704)
Supplement: Supplementary file 1 [file ijms-23-02704-s001.zip › Table S3.xlsx]

## Sheet: ST4-5
Table S3. Differentially expressed genes in HT168-M1res tumors in vivo: exp. 1
Gene/ID	FC R vs S	Ave rez	Ave S
IFI27-Hs00271467_m1	124.215	25.3946	0.20444
FGF20-Hs00173929_m1	5.43156	0.827575	0.152364
MX1-Hs00182073_m1	4.9905	146.281	29.3119
BST1-Hs00174709_m1	3.73135	10.8572	2.90972
PDE6A-Hs00166495_m1	2.66726	0.682099	0.255731
SS18L1-Hs00539314_m1	2.35323	30.4765	12.9509
CPXM1-Hs00219709_m1	2.08082	235.566	113.208
PRSS33-Hs00541732_m1	2.0495	39.8242	19.4311
CAMK1-Hs00269334_m1	2.01273	17.5973	8.74299
PTRF-Hs00396859_m1	0.499695	102.208	204.54
GABBR2-Hs00193804_m1	0.446501	31.0829	69.6144
CDKL3-Hs00179636_m1	0.445995	1.08028	2.42219
TSPAN8-Hs00610327_m1	0.410242	127.765	311.437
TYRP1-Hs00167051_m1	0.388269	37.5118	96.6129
SDC2-Hs00299807_m1	0.3774	11.2924	29.9217
C1QTNF3-Hs00229569_m1	0.36873	34.8123	94.4115
AQP1-Hs00166067_m1	0.366044	0.17522	0.478685
CDCA4-Hs00734541_g1	0.354279	4.84902	13.687
CLDN4-Hs00533616_s1	0.328723	0.129563	0.394139
C21orf129-Hs00541298_m1	0.248991	2.45999	9.87987
PDE9A-Hs00917666_m1	0.157431	0.0256826	0.163135
PDE1C-Hs01095694_m1	0.134115	0.584333	4.35695
WFDC1-Hs00221849_m1	0.0775208	40.351	520.519
FC= fold change	R= resistant	S=sensitive
Ave= average
