# Supplementary material for: Identification of a Tumor Cell Associated Type I IFN Resistance Gene Expression Signature of Human Melanoma, the Components of Which Have a Predictive Potential for Immunotherapy
Source: Int J Mol Sci. 2022 Feb 28;23(5):2704. doi: 10.3390/ijms23052704 (PMC8911010; doi:10.3390/ijms23052704)
Supplement: Supplementary file 1 [file ijms-23-02704-s001.zip › Table S4.xlsx]

## Sheet: ST4-5
									Table S4. Differentially expressed genes in HT168-M1res tumors in vivo: exp. 2
									Gene/ID	FC R vs S	Ave R	Ave S
									SLC27A4-Hs00192700_m1	168.206	11.5881	0.0688922
									WFDC1-Hs00221849_m1	2.86527	22.4852	7.8475
									NDRG1-Hs00608389_m1	2.82336	49.7618	17.625
									IFI27-Hs00271467_m1	1.9923	18.2976	9.18413
									HSF1-Hs00232134_m1	0.495695	0.686864	1.38566
									AQP1-Hs00166067_m1	0.471744	683.191	1448.22
									UCP3-Hs00243297_m1	0.460424	3.41552	7.41821
									MX1-Hs00182073_m1	0.414722	45.8779	110.623
									RPL13A-Hs01926559_g1	0.357989	5.69323	15.9034
									SSTR5-Hs00265647_s1	0.328661	65.3096	198.715
									EFHD1-Hs00368816_m1	0.290468	33.5324	115.443
									NEU1-Hs00166421_m1	0.268155	55.5977	207.334
									SDHA-Hs00188166_m1	0.263833	6.05943	22.9669
									RPE65-Hs00165642_m1	0.258917	33.7802	130.468
									IRF2-Hs00180006_m1	0.175628	0.0454266	0.258652
									CDCA4-Hs00734541_g1	0.141052	0.716753	5.08149
									HES2-Hs00219505_m1	0.103201	0.389011	3.76944
									TPD52L1-Hs00180099_m1	0.0599378	28.5201	475.829
									CDKL3-Hs00179636_m1	0.0241556	0.042832	1.77317
									FC= fold change	Ave= average
									R= resistant	S=sensitive
