# Supplementary material for: Identification of a Tumor Cell Associated Type I IFN Resistance Gene Expression Signature of Human Melanoma, the Components of Which Have a Predictive Potential for Immunotherapy
Source: Int J Mol Sci. 2022 Feb 28;23(5):2704. doi: 10.3390/ijms23052704 (PMC8911010; doi:10.3390/ijms23052704)
Supplement: Supplementary file 1 [file ijms-23-02704-s001.zip › Table S5.xlsx]

## Sheet: TCGA sample cohorts
Cohort 1: Metastatic melanomas with known therapy for their primary tumor.						Cohort 2: Metastatic melanomas with known systemic therapy (other immunotherapy than IFN was excluded).
Table S5. Cohort-1 and cohort-2 of metastatic melanomas in TCGA dataset.
Patient barcode	Prior systemic therapy					Patient barcode	Therapy for primary tumor	Therapy for metastatic tumor	Drugs's name	Therapy response	Location of metastasis
tcga-d3-a1q3	interferon					tcga-d3-a1q3	interferon	chemotherapy	cisplatin	CR	regional lymph node
tcga-d3-a2jg	interferon					tcga-d3-a1q6		immunotherapy	interferon		regional (sub)cutaneous (includes satellite and in-transit metastasis)
tcga-d3-a3cc	interferon					tcga-d3-a1q9		hormontherapy, vaccine	lupron, gp-100	PD	regional lymph node
tcga-d3-a3mu	interferon					tcga-d3-a1qa		vaccine	MAGE3	PD	regional lymph node
tcga-d3-a51j	interferon					tcga-d3-a2jc		immunotherapy	interferon		regional lymph node
tcga-d3-a5gn	interferon					tcga-d3-a2jh		immunotherapy	interferon		regional (sub)cutaneous (includes satellite and in-transit metastasis)
tcga-d3-a5gr	interferon					tcga-d3-a2jl		vaccine	gp-100, MAGE3		regional lymph node
tcga-d3-a8gc	interferon					tcga-d3-a2jn		immunotherapy	interferon		regional lymph node
tcga-d3-a8gl	interferon					tcga-d3-a2jp		immunotherapy	interferon	PR	regional lymph node
tcga-d3-a8gn	interferon					tcga-d3-a3c1		immunotherapy	interferon		regional lymph node
tcga-ee-a2gn	interferon					tcga-d3-a3c7		immunotherapy	interferon		regional lymph node
tcga-er-a19t	interferon					tcga-d3-a3cb		vaccine	mel-44	CR	regional lymph node
tcga-er-a2nc	interferon					tcga-d3-a51e		chemotherapy	actinomycin-d	CR	regional (sub)cutaneous (includes satellite and in-transit metastasis)
tcga-er-a2nd	interferon					tcga-d3-a51g		chemotherapy	melphalan	CR	regional (sub)cutaneous (includes satellite and in-transit metastasis)
tcga-fr-a7u8	interferon					tcga-d3-a51h		chemotherapy	cisplatin	CR	regional lymph node
tcga-fs-a1zs	interferon					tcga-d3-a8gb		immunotherapy	interferon	CR	regional lymph node
tcga-fs-a1zt	interferon					tcga-d3-a8gk		vaccine	mel-44	CR	left buttock mass
tcga-fs-a1zu	interferon					tcga-eb-a5kh		chemotherapy	cisplatin	CR	regional lymph node
tcga-fs-a1zw	interferon					tcga-eb-a5ul		chemotherapy	vinblastine, dacarbazine	CR	regional lymph node
tcga-fs-a1zy	interferon					tcga-ee-a29c		chemotherapy, molecular tagret	paclitaxel, BRAFi	PD	regional lymph node
tcga-fs-a1zz	interferon					tcga-ee-a29h		vaccine		PD	regional lymph node
tcga-fs-a4f0	interferon					tcga-ee-a29q		chemotherapy	dacarbazine	PD	regional (sub)cutaneous (includes satellite and in-transit metastasis)
tcga-fs-a4fd	interferon					tcga-ee-a29t		molecular target	vemurafenib		regional lymph node
tcga-gn-a262	interferon					tcga-ee-a29v		chemotherapy	dacarbazine	PD	chest
tcga-gn-a267	interferon					tcga-ee-a2gh		vaccine			regional lymph node
tcga-hr-a2oh	interferon					tcga-ee-a2gi		vaccine			regional lymph node
tcga-w3-aa1w	interferon					tcga-ee-a2gl		vaccine			regional lymph node
tcga-d3-a3ml	chemotherapy					tcga-ee-a2gu		vaccine			regional lymph node
tcga-d9-a148	immunotherapy					tcga-ee-a2m5		chemotherapy	pnu-159548	PD	regional lymph node
tcga-er-a19b	other					tcga-ee-a2md		chemotherapy	dacarbazine	PD	regional lymph node
tcga-er-a2ng	immunotherapy					tcga-ee-a2me		vaccine	cancer vax	PD	regional lymph node
tcga-er-a2nh	other					tcga-ee-a2mg		chemotherapy, vaccine	dacarbazine, cancer vax	PD	regional lymph node
tcga-er-a3es	immunotherapy/vaccine					tcga-ee-a2mh		vaccine		PD	regional lymph node
						tcga-ee-a2mm		vaccine	vmcl	PD	regional lymph node
						tcga-ee-a2mn		vaccine	vmcl	PD	regional lymph node
						tcga-ee-a2mq		chemotherapy	dacarbazine	PD	regional lymph node
						tcga-ee-a3aa		vaccine			regional lymph node
						tcga-ee-a3ad		molecular target	BRAFi	PD	regional lymph node
						tcga-ee-a3ae		vaccine	MAGE3		regional lymph node
						tcga-ee-a3af		chemotherapy	fotemustine	PD	regional lymph node
						tcga-ee-a3ag		molecular target		PD	regional (sub)cutaneous (includes satellite and in-transit metastasis)
						tcga-ee-a3ah		chemotherapy	pi88	PD	regional lymph node
						tcga-ee-a3jb		chemotherapy	alkeran		regional (sub)cutaneous (includes satellite and in-transit metastasis)
						tcga-er-a195		immunotherapy	interferon		regional lymph node
						tcga-er-a198		chemotherapy	dacarbazine		regional (sub)cutaneous (includes satellite and in-transit metastasis)
						tcga-er-a19e		chemotherapy	carboplatin, paclitaxel		regional lymph node
						tcga-er-a19g		chemotherapy	gm-csf		regional lymph node
						tcga-er-a19h		chemotherapy	dacarbazine, patrin	PD	regional (sub)cutaneous (includes satellite and in-transit metastasis)
						tcga-er-a19j		chemotherapy	dacarbazine		regional lymph node
						tcga-er-a19o		immunotherapy	interferon		regional lymph node
						tcga-er-a1a1		immunotherapy	interferon		regional lymph node
						tcga-er-a2nc	interferon	chemotherapy			chest wall
						tcga-fr-a44a		immunotherapy	interferon	CR	regional lymph node
						tcga-fr-a7u8	interferon	immunotherapy	interferon	PR	small intestine
						tcga-fr-a8yc		chemotherapy	2b3-101	PD	jejunum
						tcga-fs-a1zs	interferon	immunotherapy	interferon	SD	regional lymph node
						tcga-fs-a1zt	interferon	immunotherapy	interferon	SD	lymphnode
						tcga-fs-a1zw	interferon	immunotherapy	interferon	SD	regional lymph node
						tcga-gn-a264		immunotherapy	interferon		regional lymph node
						tcga-gn-a267	interferon	chemotherapy	temodar		regional lymph node
						tcga-gn-a4u7		molecular target	vemurafenib		regional lymph node
						tcga-w3-aa1o		chemotherapy, hormontherapy	tamoxifen, carmustine	PD	regional lymph node
						tcga-w3-aa1w	interferon	immunotherapy	interferon	PD	periaortic lymph nodes
						tcga-we-a8k6		molecular target	vemurafenib		regional lymph node
						tcga-we-a8zq		molecular target	vemurafenib		regional lymph node
						tcga-we-a8zr		molecular target	vemurafenib	PD	regional lymph node
						tcga-we-aaa4		chemotherapy	melphalan	CR	regional (sub)cutaneous (includes satellite and in-transit metastasis)
						tcga-z2-a8rt		molecular target			regional (sub)cutaneous (includes satellite and in-transit metastasis)
						tcga-z2-aa3v		molecular target			regional lymph node
						Abbreviations: CR - complete response, PD - progressive disease, PR - partial response, SD - stable disease
