# Supplementary material for: Identification of a Tumor Cell Associated Type I IFN Resistance Gene Expression Signature of Human Melanoma, the Components of Which Have a Predictive Potential for Immunotherapy
Source: Int J Mol Sci. 2022 Feb 28;23(5):2704. doi: 10.3390/ijms23052704 (PMC8911010; doi:10.3390/ijms23052704)
Supplement: Supplementary file 1 [file ijms-23-02704-s001.zip › Table S6.xlsx]

## Sheet: Munka1
DATASET	SAMPLE ID	tumor_type	FORM_RESPONSE	FORM_OS (12 month)	nivolumab	pembrolizumab	a-PD-1	ipilimumab	a-CTLA-4
n=	318		318	250	122	117	270	80	90
GIDE2019	Gide_ipiPD1_Patient1_EDT	melanoma	0	1		1	1	1	1
GIDE2019	Gide_ipiPD1_Patient1_PRE	melanoma	0	1		1	1	1	1
GIDE2019	Gide_ipiPD1_Patient10_PRE	melanoma	0	0		1	1	1	1
GIDE2019	Gide_ipiPD1_Patient12_PRE	melanoma	0		1		1	1	1
GIDE2019	Gide_ipiPD1_Patient13_EDT	melanoma	1	0	1		1	1	1
GIDE2019	Gide_ipiPD1_Patient13_PRE	melanoma	1	0	1		1	1	1
GIDE2019	Gide_ipiPD1_Patient14_PRE	melanoma	1	1		1	1	1	1
GIDE2019	Gide_ipiPD1_Patient15_PRE	melanoma	1	1		1	1	1	1
GIDE2019	Gide_ipiPD1_Patient17_PRE	melanoma	1		1		1	1	1
GIDE2019	Gide_ipiPD1_Patient19_EDT	melanoma	1	1		1	1	1	1
GIDE2019	Gide_ipiPD1_Patient19_PRE	melanoma	1	1		1	1	1	1
GIDE2019	Gide_ipiPD1_Patient2_PRE	melanoma	0	1		1	1	1	1
GIDE2019	Gide_ipiPD1_Patient20_PRE	melanoma	1	1		1	1	1	1
GIDE2019	Gide_ipiPD1_Patient21_PRE	melanoma	1	1	1		1	1	1
GIDE2019	Gide_ipiPD1_Patient23_PRE	melanoma	1	1		1	1	1	1
GIDE2019	Gide_ipiPD1_Patient24_PRE	melanoma	1	1	1		1	1	1
GIDE2019	Gide_ipiPD1_Patient25_PRE	melanoma	1	1		1	1	1	1
GIDE2019	Gide_ipiPD1_Patient26_PRE	melanoma	1	1		1	1	1	1
GIDE2019	Gide_ipiPD1_Patient27_EDT	melanoma	1	1		1	1	1	1
GIDE2019	Gide_ipiPD1_Patient27_PRE	melanoma	1	1		1	1	1	1
GIDE2019	Gide_ipiPD1_Patient32_PRE	melanoma	1	1		1	1	1	1
GIDE2019	Gide_ipiPD1_Patient33_EDT	melanoma	1	1		1	1	1	1
GIDE2019	Gide_ipiPD1_Patient33_PRE	melanoma	1	1		1	1	1	1
GIDE2019	Gide_ipiPD1_Patient34_PRE	melanoma	1	1		1	1	1	1
GIDE2019	Gide_ipiPD1_Patient35_EDT	melanoma	1	1		1	1	1	1
GIDE2019	Gide_ipiPD1_Patient35_PRE	melanoma	1	1		1	1	1	1
GIDE2019	Gide_ipiPD1_Patient36_EDT	melanoma	1	1		1	1	1	1
GIDE2019	Gide_ipiPD1_Patient36_PRE	melanoma	1	1		1	1	1	1
GIDE2019	Gide_ipiPD1_Patient37_PRE	melanoma	1	1		1	1	1	1
GIDE2019	Gide_ipiPD1_Patient44_PRE	melanoma	1	1		1	1	1	1
GIDE2019	Gide_ipiPD1_Patient45_PRE	melanoma	1	1		1	1	1	1
GIDE2019	Gide_ipiPD1_Patient46_PRE	melanoma	1	1		1	1	1	1
GIDE2019	Gide_ipiPD1_Patient47_PRE	melanoma	1	1		1	1	1	1
GIDE2019	Gide_ipiPD1_Patient49_PRE	melanoma	1	1		1	1	1	1
GIDE2019	Gide_ipiPD1_Patient50_PRE	melanoma	1	1		1	1	1	1
GIDE2019	Gide_ipiPD1_Patient6_PRE	melanoma	0	0	1		1	1	1
GIDE2019	Gide_ipiPD1_Patient7_PRE	melanoma	1		1		1	1	1
GIDE2019	Gide_ipiPD1_Patient8_PRE	melanoma	0	1		1	1	1	1
GIDE2019	Gide_PD1_Patient10_EDT	melanoma	0	1		1	1
GIDE2019	Gide_PD1_Patient10_PRE	melanoma	0	1		1	1
GIDE2019	Gide_PD1_Patient11_PRE	melanoma	0	0		1	1
GIDE2019	Gide_PD1_Patient12_PRE	melanoma	1	0		1	1
GIDE2019	Gide_PD1_Patient13_EDT	melanoma	0	0		1	1
GIDE2019	Gide_PD1_Patient13_PRE	melanoma	0	0		1	1
GIDE2019	Gide_PD1_Patient14_PRE	melanoma	0	1		1	1
GIDE2019	Gide_PD1_Patient15_PRE	melanoma	0	0		1	1
GIDE2019	Gide_PD1_Patient16_PRE	melanoma	0	0		1	1
GIDE2019	Gide_PD1_Patient17_EDT	melanoma	0	0		1	1
GIDE2019	Gide_PD1_Patient17_PRE	melanoma	0	0		1	1
GIDE2019	Gide_PD1_Patient18_PRE	melanoma	0	0		1	1
GIDE2019	Gide_PD1_Patient19_PRE	melanoma	1	1		1	1
GIDE2019	Gide_PD1_Patient2_PRE	melanoma	0	0		1	1
GIDE2019	Gide_PD1_Patient21_PRE	melanoma	1	1		1	1
GIDE2019	Gide_PD1_Patient23_PRE	melanoma	1	0	1		1
GIDE2019	Gide_PD1_Patient25_EDT	melanoma	1	1	1		1
GIDE2019	Gide_PD1_Patient25_PRE	melanoma	1	1	1		1
GIDE2019	Gide_PD1_Patient27_PRE	melanoma	1	1		1	1
GIDE2019	Gide_PD1_Patient29_EDT	melanoma	1	1		1	1
GIDE2019	Gide_PD1_Patient29_PRE	melanoma	1	1		1	1
GIDE2019	Gide_PD1_Patient3_PRE	melanoma	0	0	1		1
GIDE2019	Gide_PD1_Patient30_PRE	melanoma	1	1		1	1
GIDE2019	Gide_PD1_Patient34_PRE	melanoma	1	1		1	1
GIDE2019	Gide_PD1_Patient35_PRE	melanoma	1	1		1	1
GIDE2019	Gide_PD1_Patient36_PRE	melanoma	1	1	1		1
GIDE2019	Gide_PD1_Patient38_PRE	melanoma	1	1		1	1
GIDE2019	Gide_PD1_Patient4_PRE	melanoma	0	0		1	1
GIDE2019	Gide_PD1_Patient40_PRE	melanoma	1	1		1	1
GIDE2019	Gide_PD1_Patient41_EDT	melanoma	1	1		1	1
GIDE2019	Gide_PD1_Patient41_PRE	melanoma	1	1		1	1
GIDE2019	Gide_PD1_Patient42_PRE	melanoma	1	1		1	1
GIDE2019	Gide_PD1_Patient44_PRE	melanoma	1	1		1	1
GIDE2019	Gide_PD1_Patient45_PRE	melanoma	1	1		1	1
GIDE2019	Gide_PD1_Patient46_PRE	melanoma	1	1		1	1
GIDE2019	Gide_PD1_Patient47_EDT	melanoma	1	1		1	1
GIDE2019	Gide_PD1_Patient47_PRE	melanoma	1	1		1	1
GIDE2019	Gide_PD1_Patient48_EDT	melanoma	1	1		1	1
GIDE2019	Gide_PD1_Patient48_PRE	melanoma	1	1		1	1
GIDE2019	Gide_PD1_Patient49_PRE	melanoma	1	1	1		1
GIDE2019	Gide_PD1_Patient5_PRE	melanoma	0	0		1	1
GIDE2019	Gide_PD1_Patient50_PRE	melanoma	1	1	1		1
GIDE2019	Gide_PD1_Patient52_PRE	melanoma	1	1		1	1
GIDE2019	Gide_PD1_Patient53_PRE	melanoma	1	1		1	1
GIDE2019	Gide_PD1_Patient54_PRE	melanoma	1	1		1	1
GIDE2019	Gide_PD1_Patient6_PRE	melanoma	0	0	1		1
GIDE2019	Gide_PD1_Patient7_PRE	melanoma	0	0	1		1
GIDE2019	Gide_PD1_Patient8_EDT	melanoma	0	0	1		1
GIDE2019	Gide_PD1_Patient8_PRE	melanoma	0	0	1		1
GIDE2019	Gide_PD1_Patient9_PRE	melanoma	0	0		1	1
GSE115821	GSM3190464	melanoma	0						1
GSE115821	GSM3190465	melanoma	0						1
GSE115821	GSM3190466	melanoma	1				1
GSE115821	GSM3190467	melanoma	0						1
GSE115821	GSM3190468	melanoma	0				1
GSE115821	GSM3190469	melanoma	0				1
GSE115821	GSM3190470	melanoma	0						1
GSE115821	GSM3190471	melanoma	0						1
GSE115821	GSM3190472	melanoma	0						1
GSE115821	GSM3190473	melanoma	0				1
GSE115821	GSM3190474	melanoma	0				1
GSE115821	GSM3190475	melanoma	0				1
GSE115821	GSM3190476	melanoma	0				1
GSE115821	GSM3190477	melanoma	0				1
GSE115821	GSM3190478	melanoma	0				1
GSE115821	GSM3190479	melanoma	1				1		1
GSE115821	GSM3190480	melanoma	1				1		1
GSE115821	GSM3190481	melanoma	0				1		1
GSE115821	GSM3190482	melanoma	0				1		1
GSE115821	GSM3190483	melanoma	0				1
GSE115821	GSM3190484	melanoma	0				1
GSE115821	GSM3190485	melanoma	0				1
GSE115821	GSM3190486	melanoma	0				1
GSE115821	GSM3190487	melanoma	0				1
GSE115821	GSM3190488	melanoma	0				1
GSE115821	GSM3190489	melanoma	0				1
GSE115821	GSM3190490	melanoma	0				1
GSE115821	GSM3190491	melanoma	0				1
GSE115821	GSM3190492	melanoma	0				1
GSE115821	GSM3190493	melanoma	0				1
GSE115821	GSM3190494	melanoma	0				1
GSE115821	GSM3190495	melanoma	0				1
GSE115821	GSM3190496	melanoma	0				1
GSE115821	GSM3190497	melanoma	0				1
GSE115821	GSM3190498	melanoma	0				1
GSE115821	GSM3190499	melanoma	0				1
GSE115821	GSM3190500	melanoma	0				1
GSE78220	GSM2069823	melanoma	0	1		1	1
GSE78220	GSM2069824	melanoma	1	1		1	1
GSE78220	GSM2069825	melanoma	1	1		1	1
GSE78220	GSM2069826	melanoma	1	1		1	1
GSE78220	GSM2069827	melanoma	1	1		1	1
GSE78220	GSM2069828	melanoma	0	1		1	1
GSE78220	GSM2069829	melanoma	1	1		1	1
GSE78220	GSM2069830	melanoma	1	1		1	1
GSE78220	GSM2069831	melanoma	0	1		1	1
GSE78220	GSM2069832	melanoma	0	0		1	1
GSE78220	GSM2069833	melanoma	1	1		1	1
GSE78220	GSM2069834	melanoma	0			1	1
GSE78220	GSM2069835	melanoma	1	1		1	1
GSE78220	GSM2069836	melanoma	0	0		1	1
GSE78220	GSM2069837	melanoma	1	1		1	1
GSE78220	GSM2069838	melanoma	0	0		1	1
GSE78220	GSM2069839	melanoma	0	0		1	1
GSE78220	GSM2069840	melanoma	0	0		1	1
GSE78220	GSM2069841	melanoma	0	0		1	1
GSE78220	GSM2069842	melanoma	1	1		1	1
GSE78220	GSM2069843	melanoma	1	1		1	1
GSE78220	GSM2069844	melanoma	1	1		1	1
GSE78220	GSM2069845	melanoma	0	0		1	1
GSE78220	GSM2069846	melanoma	0	1		1	1
GSE78220	GSM2069847	melanoma	0	0		1	1
GSE78220	GSM2069848	melanoma	1	1		1	1
GSE78220	GSM2069849	melanoma	1	1		1	1
GSE78220	GSM2069850	melanoma	1	1		1	1
GSE91061	Riaz_Pt1_On	melanoma	0	0	1		1
GSE91061	Riaz_Pt1_Pre	melanoma	0	0	1		1
GSE91061	Riaz_Pt10_On	melanoma	0	0	1		1
GSE91061	Riaz_Pt10_Pre	melanoma	0	0	1		1
GSE91061	Riaz_Pt101_On	melanoma	1	1	1		1
GSE91061	Riaz_Pt101_Pre	melanoma	1	1	1		1
GSE91061	Riaz_Pt103_On	melanoma	0	1	1		1
GSE91061	Riaz_Pt103_Pre	melanoma	0	1	1		1
GSE91061	Riaz_Pt106_On	melanoma	0	0	1		1
GSE91061	Riaz_Pt106_Pre	melanoma	0	0	1		1
GSE91061	Riaz_Pt108_On	melanoma	0	1	1		1
GSE91061	Riaz_Pt11_On	melanoma	0	1	1		1
GSE91061	Riaz_Pt11_Pre	melanoma	0	1	1		1
GSE91061	Riaz_Pt13_On	melanoma	0	0	1		1
GSE91061	Riaz_Pt17_On	melanoma	0	0	1		1
GSE91061	Riaz_Pt17_Pre	melanoma	0	0	1		1
GSE91061	Riaz_Pt18_On	melanoma	1	1	1		1
GSE91061	Riaz_Pt18_Pre	melanoma	1	1	1		1
GSE91061	Riaz_Pt2_On	melanoma	0	0	1		1
GSE91061	Riaz_Pt2_Pre	melanoma	0	0	1		1
GSE91061	Riaz_Pt24_Pre	melanoma	0		1		1
GSE91061	Riaz_Pt26_On	melanoma	0	1	1		1
GSE91061	Riaz_Pt26_Pre	melanoma	0	1	1		1
GSE91061	Riaz_Pt27_On	melanoma	0	1	1		1
GSE91061	Riaz_Pt27_Pre	melanoma	0	1	1		1
GSE91061	Riaz_Pt28_On	melanoma	0	1	1		1
GSE91061	Riaz_Pt28_Pre	melanoma	0	1	1		1
GSE91061	Riaz_Pt29_Pre	melanoma	0	0	1		1
GSE91061	Riaz_Pt3_On	melanoma	1	1	1		1
GSE91061	Riaz_Pt3_Pre	melanoma	1	1	1		1
GSE91061	Riaz_Pt30_On	melanoma	1	1	1		1
GSE91061	Riaz_Pt30_Pre	melanoma	1	1	1		1
GSE91061	Riaz_Pt31_On	melanoma	0	1	1		1
GSE91061	Riaz_Pt31_Pre	melanoma	0	1	1		1
GSE91061	Riaz_Pt32_On	melanoma	0		1		1
GSE91061	Riaz_Pt34_On	melanoma	1	1	1		1
GSE91061	Riaz_Pt34_Pre	melanoma	1	1	1		1
GSE91061	Riaz_Pt36_On	melanoma	0	1	1		1
GSE91061	Riaz_Pt36_Pre	melanoma	0	1	1		1
GSE91061	Riaz_Pt37_On	melanoma	0	1	1		1
GSE91061	Riaz_Pt37_Pre	melanoma	0	1	1		1
GSE91061	Riaz_Pt38_On	melanoma	0	0	1		1
GSE91061	Riaz_Pt38_Pre	melanoma	0	0	1		1
GSE91061	Riaz_Pt39_Pre	melanoma	0	0	1		1
GSE91061	Riaz_Pt4_On	melanoma	0	1	1		1
GSE91061	Riaz_Pt4_Pre	melanoma	0	1	1		1
GSE91061	Riaz_Pt44_On	melanoma	1	1	1		1
GSE91061	Riaz_Pt44_Pre	melanoma	1	1	1		1
GSE91061	Riaz_Pt46_On	melanoma	0	0	1		1
GSE91061	Riaz_Pt46_Pre	melanoma	0	0	1		1
GSE91061	Riaz_Pt47_On	melanoma	0	1	1		1
GSE91061	Riaz_Pt47_Pre	melanoma	0	1	1		1
GSE91061	Riaz_Pt48_On	melanoma	1	1	1		1
GSE91061	Riaz_Pt48_Pre	melanoma	1	1	1		1
GSE91061	Riaz_Pt49_On	melanoma	1	1	1		1
GSE91061	Riaz_Pt49_Pre	melanoma	1	1	1		1
GSE91061	Riaz_Pt5_On	melanoma	0	0	1		1
GSE91061	Riaz_Pt5_Pre	melanoma	0	0	1		1
GSE91061	Riaz_Pt52_On	melanoma	0	1	1		1
GSE91061	Riaz_Pt52_Pre	melanoma	0	1	1		1
GSE91061	Riaz_Pt58_On	melanoma	0	1	1		1
GSE91061	Riaz_Pt59_Pre	melanoma	0	1	1		1
GSE91061	Riaz_Pt62_On	melanoma	0	1	1		1
GSE91061	Riaz_Pt62_Pre	melanoma	0	1	1		1
GSE91061	Riaz_Pt65_On	melanoma	0	1	1		1
GSE91061	Riaz_Pt65_Pre	melanoma	0	1	1		1
GSE91061	Riaz_Pt66_Pre	melanoma	0	1	1		1
GSE91061	Riaz_Pt67_On	melanoma	0	1	1		1
GSE91061	Riaz_Pt67_Pre	melanoma	0	1	1		1
GSE91061	Riaz_Pt68_On	melanoma	1	1	1		1
GSE91061	Riaz_Pt72_Pre	melanoma	1	1	1		1
GSE91061	Riaz_Pt77_On	melanoma	0	1	1		1
GSE91061	Riaz_Pt77_Pre	melanoma	0	1	1		1
GSE91061	Riaz_Pt78_On	melanoma	0	0	1		1
GSE91061	Riaz_Pt78_Pre	melanoma	0	0	1		1
GSE91061	Riaz_Pt79_On	melanoma	0	0	1		1
GSE91061	Riaz_Pt79_Pre	melanoma	0	0	1		1
GSE91061	Riaz_Pt8_On	melanoma	0	0	1		1
GSE91061	Riaz_Pt8_Pre	melanoma	0	0	1		1
GSE91061	Riaz_Pt82_On	melanoma	0	1	1		1
GSE91061	Riaz_Pt82_Pre	melanoma	0	1	1		1
GSE91061	Riaz_Pt84_On	melanoma	0	0	1		1
GSE91061	Riaz_Pt84_Pre	melanoma	0	0	1		1
GSE91061	Riaz_Pt85_On	melanoma	0	1	1		1
GSE91061	Riaz_Pt85_Pre	melanoma	0	1	1		1
GSE91061	Riaz_Pt87_On	melanoma	0	1	1		1
GSE91061	Riaz_Pt89_On	melanoma	0	1	1		1
GSE91061	Riaz_Pt89_Pre	melanoma	0	1	1		1
GSE91061	Riaz_Pt9_On	melanoma	0	0	1		1
GSE91061	Riaz_Pt9_Pre	melanoma	0	0	1		1
GSE91061	Riaz_Pt90_Pre	melanoma	0	0	1		1
GSE91061	Riaz_Pt92_On	melanoma	0	0	1		1
GSE91061	Riaz_Pt92_Pre	melanoma	0	0	1		1
GSE91061	Riaz_Pt93_On	melanoma	0	1	1		1
GSE91061	Riaz_Pt94_On	melanoma	1	1	1		1
GSE91061	Riaz_Pt94_Pre	melanoma	1	1	1		1
GSE91061	Riaz_Pt98_On	melanoma	0	1	1		1
GSE91061	Riaz_Pt98_Pre	melanoma	0	1	1		1
GSE93157	GSM2445716	melanoma	0			1	1
GSE93157	GSM2445717	melanoma	0			1	1
GSE93157	GSM2445718	melanoma	0			1	1
GSE93157	GSM2445719	melanoma	0			1	1
GSE93157	GSM2445720	melanoma	0			1	1
GSE93157	GSM2445721	melanoma	0			1	1
GSE93157	GSM2445722	melanoma	0		1		1
GSE93157	GSM2445723	melanoma	0			1	1
GSE93157	GSM2445724	melanoma	0		1		1
GSE93157	GSM2445725	melanoma	0			1	1
GSE93157	GSM2445726	melanoma	0			1	1
GSE93157	GSM2445727	melanoma	1			1	1
GSE93157	GSM2445728	melanoma	1			1	1
GSE93157	GSM2445729	melanoma	1			1	1
GSE93157	GSM2445730	melanoma	1			1	1
GSE93157	GSM2445731	melanoma	1		1		1
GSE93157	GSM2445732	melanoma	1			1	1
GSE93157	GSM2445733	melanoma	1		1		1
GSE93157	GSM2445734	melanoma	0			1	1
GSE93157	GSM2445735	melanoma	0			1	1
GSE93157	GSM2445736	melanoma	0			1	1
GSE93157	GSM2445737	melanoma	1			1	1
GSE93157	GSM2445738	melanoma	0		1		1
GSE93157	GSM2445739	melanoma	0			1	1
GSE93157	GSM2445740	melanoma	1			1	1
VANALLEN2015	Van_Pat02	melanoma	1	1				1	1
VANALLEN2015	Van_Pat03	melanoma	0	0				1	1
VANALLEN2015	Van_Pat04	melanoma	1	1				1	1
VANALLEN2015	Van_Pat06	melanoma	0	0				1	1
VANALLEN2015	Van_Pat08	melanoma	0	0				1	1
VANALLEN2015	Van_Pat118	melanoma	0	0				1	1
VANALLEN2015	Van_Pat119	melanoma	0	1				1	1
VANALLEN2015	Van_Pat123	melanoma	1	1				1	1
VANALLEN2015	Van_Pat126	melanoma	1	1				1	1
VANALLEN2015	Van_Pat14	melanoma	0	0				1	1
VANALLEN2015	Van_Pat15	melanoma	0	0				1	1
VANALLEN2015	Van_Pat16	melanoma	0	1				1	1
VANALLEN2015	Van_Pat19	melanoma	0	0				1	1
VANALLEN2015	Van_Pat20	melanoma	0	0				1	1
VANALLEN2015	Van_Pat25	melanoma	0	0				1	1
VANALLEN2015	Van_Pat27	melanoma	0	1				1	1
VANALLEN2015	Van_Pat28	melanoma	0	1				1	1
VANALLEN2015	Van_Pat29	melanoma	1	1				1	1
VANALLEN2015	Van_Pat33	melanoma	0	0				1	1
VANALLEN2015	Van_Pat36	melanoma	0	0				1	1
VANALLEN2015	Van_Pat37	melanoma	0	0				1	1
VANALLEN2015	Van_Pat38	melanoma	1	1				1	1
VANALLEN2015	Van_Pat39	melanoma	1	1				1	1
VANALLEN2015	Van_Pat40	melanoma	0	0				1	1
VANALLEN2015	Van_Pat41	melanoma	0	0				1	1
VANALLEN2015	Van_Pat43	melanoma	0	0				1	1
VANALLEN2015	Van_Pat44	melanoma	0	0				1	1
VANALLEN2015	Van_Pat45	melanoma	0	0				1	1
VANALLEN2015	Van_Pat46	melanoma	0	0				1	1
VANALLEN2015	Van_Pat47	melanoma	1	1				1	1
VANALLEN2015	Van_Pat49	melanoma	1	1				1	1
VANALLEN2015	Van_Pat50	melanoma	0	0				1	1
VANALLEN2015	Van_Pat79	melanoma	1	1				1	1
VANALLEN2015	Van_Pat80	melanoma	1	1				1	1
VANALLEN2015	Van_Pat81	melanoma	0	1				1	1
VANALLEN2015	Van_Pat83	melanoma	0	1				1	1
VANALLEN2015	Van_Pat85	melanoma	0	1				1	1
VANALLEN2015	Van_Pat86	melanoma	0	0				1	1
VANALLEN2015	Van_Pat88	melanoma	1	1				1	1
VANALLEN2015	Van_Pat90	melanoma	1	1				1	1
VANALLEN2015	Van_Pat91	melanoma	1	1				1	1
VANALLEN2015	Van_Pat98	melanoma	0	0				1	1
Supplementary Table 1. Immune checkpoint inhibitor treated melanoma patient cohort derived from various in silico datasets
Form response: 0= no response, 1= responded. Survival at 12 month: 0= not reached, 1= survived
