# Supplementary material for: Identification of a Tumor Cell Associated Type I IFN Resistance Gene Expression Signature of Human Melanoma, the Components of Which Have a Predictive Potential for Immunotherapy
Source: Int J Mol Sci. 2022 Feb 28;23(5):2704. doi: 10.3390/ijms23052704 (PMC8911010; doi:10.3390/ijms23052704)
Supplement: Supplementary file 1 [file ijms-23-02704-s001.zip › Table S7.txt]

SAMPLE	tumor_type	RESPONSE (1=responder)	OS AT 12 MONTHS (1=alive)	ABCC1	ATF5	ATF5	ATF5	BCORL1	BEHAB	BST1	C1QTNF3	CALM3	CALM3	CAMK1	CAMK1	CAMK1	CDCA4	CDKL3	CLDN4	CLDN4	CLDN4	COL6A1	CPXM1	CTSB	DDX10	DEK	DKK1	DKK1	DKK1	DOCK11	DOCK11	DOK5	EFHD1	EFHD1	EFNA3	EGR1	EGR1	FGF20	FGF20	FGF20	GAGE2C	GPI	GPI	GPR51	HDAC8	HES2	HOXC11	HOXC11	HOXD10
Riaz_Pt1_Pre	melanoma	0	0	876	1612	1612	1612	375	17	301	66	7620	7620	449	449	449	770	47	7	7	7	890	252	361892	374	3714	5	5	5	609	609	54	669	669	63	636	636	9	9	9	NA	7804	7804	5	286	46	9	9	38
Riaz_Pt2_Pre	melanoma	0	0	4271	2133	2133	2133	199	34	230	85	6157	6157	179	179	179	463	44	20	20	20	11306	433	143412	518	5579	13	13	13	793	793	97	115	115	69	426	426	1	1	1	NA	9076	9076	1	312	24	54	54	6
Riaz_Pt39_Pre	melanoma	0	0	2425	233	233	233	267	34439	97	459	6919	6919	66	66	66	485	95	2	2	2	1839	1069	5859	1122	11573	39	39	39	258	258	50	1699	1699	444	191	191	2	2	2	NA	6630	6630	2	433	2	159	159	2
Riaz_Pt59_Pre	melanoma	0	1	969	808	808	808	308	768	365	10604	9683	9683	413	413	413	502	49	18	18	18	8284	13913	293020	414	5098	32	32	32	830	830	408	70	70	63	829	829	7	7	7	NA	4923	4923	1	261	27	72	72	28
Riaz_Pt82_Pre	melanoma	0	1	538	585	585	585	261	285	168	386	6523	6523	132	132	132	517	32	28	28	28	4426	74	65839	1013	10626	13	13	13	447	447	43	7782	7782	36	323	323	6	6	6	NA	3504	3504	2	484	37	2	2	2
Riaz_Pt49_Pre	melanoma	1	1	774	1070	1070	1070	189	787	389	1759	6730	6730	343	343	343	189	36	15	15	15	11085	1328	88505	400	5041	31	31	31	2366	2366	86	160	160	38	916	916	1	1	1	NA	4567	4567	1	242	34	7	7	15
Riaz_Pt66_Pre	melanoma	0	1	503	573	573	573	234	6896	156	986	10626	10626	161	161	161	820	44	20	20	20	5739	221	24698	435	6949	332	332	332	316	316	36	578	578	78	117	117	7	7	7	NA	9358	9358	1	361	19	64	64	39
Riaz_Pt85_Pre	melanoma	0	1	125	980	980	980	355	98	892	1200	9247	9247	780	780	780	798	78	15	15	15	3455	49	361892	1086	7106	3883	3883	3883	558	558	29	54	54	128	752	752	2	2	2	NA	5367	5367	2	780	23	11	11	29
Riaz_Pt89_Pre	melanoma	0	1	724	485	485	485	331	70	226	133	6904	6904	230	230	230	805	11	221	221	221	48579	2235	132498	538	4787	27	27	27	544	544	51	87	87	280	2198	2198	5	5	5	NA	8886	8886	1	238	266	53	53	27
Riaz_Pt101_Pre	melanoma	1	1	1502	918	918	918	220	1	176	104	9262	9262	247	247	247	515	41	39	39	39	2316	75	32699	560	8616	21	21	21	3885	3885	56	50	50	51	513	513	1	1	1	NA	3011	3011	1	250	13	1	1	8
Riaz_Pt47_Pre	melanoma	0	1	347	408	408	408	319	4	614	686	4361	4361	230	230	230	465	43	40	40	40	22005	629	505327	551	6049	135	135	135	734	734	53	65	65	25	2732	2732	1	1	1	NA	3459	3459	1	253	14	7	7	1
Riaz_Pt52_Pre	melanoma	0	1	771	3567	3567	3567	252	11	135	9424	5650	5650	312	312	312	147	17	71	71	71	9326	1692	79849	714	3047	12	12	12	965	965	42	228	228	41	1446	1446	1	1	1	NA	3935	3935	1	341	12	45	45	21
Riaz_Pt67_Pre	melanoma	0	1	910	396	396	396	202	123	44	272	7998	7998	104	104	104	144	27	71	71	71	1996	66	18541	445	5073	94	94	94	222	222	16	3007	3007	13	98	98	30	30	30	NA	5842	5842	1	275	11	1	1	1
Riaz_Pt94_Pre	melanoma	1	1	1079	439	439	439	413	44	275	113	4336	4336	168	168	168	527	24	10	10	10	7465	292	95779	808	4976	11	11	11	439	439	60	119	119	44	593	593	5	5	5	NA	6067	6067	1	283	32	83	83	20
Riaz_Pt77_Pre	melanoma	0	1	734	475	475	475	198	140	202	185	4671	4671	269	269	269	219	38	49	49	49	6964	228	110416	250	5065	40	40	40	1490	1490	53	75	75	12	3766	3766	11	11	11	NA	4805	4805	2	254	7	58	58	23
Riaz_Pt79_Pre	melanoma	0	0	697	228	228	228	548	8128	82	89	9796	9796	196	196	196	266	63	28	28	28	1124	527	49286	444	8235	77	77	77	614	614	296	1956	1956	39	156	156	11	11	11	NA	5744	5744	2	400	2	2	2	41
Riaz_Pt84_Pre	melanoma	0	0	802	751	751	751	262	3290	165	177	8033	8033	256	256	256	512	64	18	18	18	8248	318	12498	1019	3981	30	30	30	357	357	839	4861	4861	56	335	335	2	2	2	NA	14121	14121	2	267	25	2	2	10
Riaz_Pt98_Pre	melanoma	0	1	384	295	295	295	276	1945	171	77	7630	7630	108	108	108	585	73	34	34	34	1540	184	37070	1034	8943	2	2	2	210	210	583	18043	18043	51	229	229	24	24	24	NA	4981	4981	10	401	13	2	2	2
Riaz_Pt62_Pre	melanoma	0	1	457	422	422	422	210	863	283	38	5461	5461	288	288	288	597	116	14	14	14	850	2296	23628	588	6911	48	48	48	209	209	127	7836	7836	169	691	691	2	2	2	NA	8383	8383	2	413	36	40	40	10
Riaz_Pt65_Pre	melanoma	0	1	996	494	494	494	249	744	296	53	2837	2837	167	167	167	280	30	26	26	26	6014	543	42863	498	7446	537	537	537	1007	1007	102	139	139	87	253	253	5	5	5	NA	7140	7140	1	457	480	8	8	45
Riaz_Pt72_Pre	melanoma	1	1	1094	643	643	643	170	1909	196	18614	4985	4985	338	338	338	788	47	29	29	29	2504	55	104775	766	5248	2	2	2	837	837	43	77	77	86	2630	2630	2	2	2	NA	9200	9200	2	337	23	99	99	19
Riaz_Pt78_Pre	melanoma	0	0	981	300	300	300	205	22336	268	17166	8210	8210	119	119	119	1032	117	13	13	13	2325	1581	10243	966	8534	42	42	42	227	227	106	108	108	97	3071	3071	18	18	18	NA	11601	11601	2	516	27	108	108	21
Riaz_Pt90_Pre	melanoma	0	0	513	703	703	703	264	788	306	38	12062	12062	129	129	129	504	35	826	826	826	2504	75	143412	540	4640	89	89	89	339	339	138	954	954	69	14636	14636	9	9	9	NA	7772	7772	1	310	155	30	30	7
Riaz_Pt92_Pre	melanoma	0	0	858	537	537	537	352	106	288	327	8321	8321	180	180	180	930	17	19	19	19	15091	829	57087	456	6292	14	14	14	678	678	58	718	718	130	3586	3586	16	16	16	NA	5909	5909	1	249	13	154	154	6
Riaz_Pt103_Pre	melanoma	0	1	617	2605	2605	2605	78	44	1018	1078	8804	8804	927	927	927	526	36	136	136	136	12595	5239	52387	164	3443	29	29	29	516	516	82	186	186	246	631	631	12	12	12	NA	6502	6502	2	361	56	45	45	29
Riaz_Pt3_Pre	melanoma	1	1	1037	224	224	224	498	7998	342	49	3865	3865	136	136	136	1327	76	26	26	26	7255	458	47842	377	6972	582	582	582	671	671	219	89	89	79	1483	1483	2	2	2	NA	11383	11383	2	282	107	56	56	17
Riaz_Pt4_Pre	melanoma	0	1	734	770	770	770	506	1104	199	2414	6292	6292	226	226	226	1364	76	55	55	55	5655	224	42863	534	5520	58	58	58	419	419	1174	555	555	144	5490	5490	1	1	1	NA	4907	4907	1	416	137	9	9	197
Riaz_Pt5_Pre	melanoma	0	0	818	1412	1412	1412	472	89	159	72	11545	11545	414	414	414	670	55	542	542	542	3686	58	99866	198	5172	441	441	441	1235	1235	631	197	197	165	2191	2191	2	2	2	NA	8972	8972	12	383	31	131	131	42
Riaz_Pt9_Pre	melanoma	0	0	1285	364	364	364	842	67	76	8009	6502	6502	274	274	274	258	44	134	134	134	11133	5317	116821	597	11182	295	295	295	899	899	147	79	79	47	2150	2150	9	9	9	NA	5530	5530	1	282	6	164	164	353
Riaz_Pt10_Pre	melanoma	0	0	1394	177	177	177	491	12968	180	2074	6709	6709	130	130	130	284	62	9	9	9	1061	3424	24558	791	8804	27	27	27	530	530	57	1579	1579	117	498	498	7	7	7	NA	5954	5954	2	312	2	17	17	32
Riaz_Pt17_Pre	melanoma	0	0	1298	323	323	323	443	1360	229	128	7114	7114	284	284	284	282	119	16	16	16	3299	339	28951	733	4824	53	53	53	536	536	215	9702	9702	145	276	276	2	2	2	NA	6072	6072	2	584	46	2	2	10
Riaz_Pt18_Pre	melanoma	1	1	895	446	446	446	149	13	115	1083	6325	6325	147	147	147	407	39	28	28	28	813	91	59275	662	5605	75	75	75	2644	2644	1187	46	46	149	879	879	1	1	1	NA	6523	6523	1	453	9	9	9	13
Riaz_Pt38_Pre	melanoma	0	0	981	679	679	679	435	7772	310	82	10517	10517	119	119	119	440	81	17	17	17	3890	86	37451	1178	6730	12	12	12	370	370	335	264	264	63	237	237	6	6	6	NA	9948	9948	2	339	50	98	98	28
Riaz_Pt48_Pre	melanoma	1	1	419	5163	5163	5163	218	8140	152	104	3810	3810	362	362	362	77	33	17	17	17	2835	79	42863	303	3979	22	22	22	603	603	41	1079	1079	40	2337	2337	1	1	1	NA	4097	4097	1	265	5	5	5	6
Riaz_Pt36_Pre	melanoma	0	1	2996	344	344	344	375	9	746	8033	7494	7494	558	558	558	186	52	102	102	102	51554	5029	124212	324	5111	159	159	159	3912	3912	250	378	378	39	2285	2285	1	1	1	NA	4321	4321	1	224	14	10	10	25
Riaz_Pt37_Pre	melanoma	0	1	1006	681	681	681	106	682	401	197	4941	4941	124	124	124	1171	22	236	236	236	15526	1425	65839	361	5141	12	12	12	315	315	24	107	107	276	5804	5804	1	1	1	NA	7185	7185	1	261	210	106	106	29
Riaz_Pt46_Pre	melanoma	0	0	2219	1825	1825	1825	242	12	599	223	15375	15375	593	593	593	272	67	24	24	24	33552	7942	204293	431	4976	32	32	32	2327	2327	141	66	66	58	535	535	9	9	9	NA	6380	6380	2	269	303	35	35	6
Riaz_Pt24_Pre	melanoma	0	NA	1371	2673	2673	2673	184	2	1046	194	11713	11713	660	660	660	359	88	22	22	22	4401	293	204293	465	6651	7	7	7	3647	3647	183	156	156	53	5226	5226	19	19	19	NA	7942	7942	2	373	1094	2	2	21
Riaz_Pt27_Pre	melanoma	0	1	219	699	699	699	295	9	760	2103	4544	4544	231	231	231	422	46	2	2	2	447	1939	505327	364	8547	20	20	20	2361	2361	19	91	91	31	806	806	2	2	2	NA	12563	12563	2	419	14	12	12	2
Riaz_Pt29_Pre	melanoma	0	0	793	695	695	695	276	1710	171	80	10203	10203	151	151	151	595	58	338	338	338	2575	720	79849	914	6420	36	36	36	584	584	71	401	401	163	999	999	5	5	5	NA	7456	7456	1	438	23	7	7	38
Riaz_Pt30_Pre	melanoma	1	1	1268	308	308	308	1579	12659	216	153	3436	3436	93	93	93	398	54	19	19	19	894	31	16803	653	11085	5	5	5	878	878	94	173	173	268	130	130	1	1	1	NA	15476	15476	1	554	31	253	253	38
Riaz_Pt31_Pre	melanoma	0	1	1197	386	386	386	193	251	100	223	6007	6007	85	85	85	243	53	15	15	15	1207	136	29854	626	7465	8	8	8	970	970	138	183	183	110	1352	1352	1	1	1	NA	5712	5712	1	255	12	112	112	69
Riaz_Pt8_Pre	melanoma	0	0	995	480	480	480	293	3077	291	1263	8534	8534	225	225	225	469	44	12	12	12	16115	1287	116821	771	8722	23	23	23	808	808	65	138	138	35	1649	1649	1	1	1	NA	5723	5723	1	346	11	34	34	18
Riaz_Pt11_Pre	melanoma	0	1	964	435	435	435	245	1693	250	688	6286	6286	255	255	255	396	22	421	421	421	5892	90	124212	507	5995	9	9	9	970	970	22	63	63	160	460	460	4	4	4	NA	7264	7264	1	251	304	41	41	28
Riaz_Pt26_Pre	melanoma	0	1	943	634	634	634	539	110	803	181	5864	5864	278	278	278	452	52	8	8	8	1571	177	45209	969	4155	124	124	124	456	456	24	118	118	49	619	619	2	2	2	NA	5381	5381	2	403	57	2	2	12
Riaz_Pt28_Pre	melanoma	0	1	703	352	352	352	199	55	255	366	4926	4926	82	82	82	798	53	26	26	26	3563	205	19009	496	7910	13	13	13	524	524	54	1108	1108	41	2603	2603	2	2	2	NA	4537	4537	2	326	8	36	36	11
Riaz_Pt44_Pre	melanoma	1	1	918	1023	1023	1023	372	2300	254	9968	6866	6866	276	276	276	442	46	35	35	35	12274	738	110416	984	10243	96	96	96	6537	6537	176	112	112	74	3798	3798	8	8	8	NA	5129	5129	1	462	1	53	53	249
Riaz_Pt106_Pre	melanoma	0	0	552	385	385	385	138	163	123	792	9595	9595	134	134	134	605	65	12	12	12	32409	2974	88505	492	9892	18	18	18	519	519	238	439	439	34	729	729	1	1	1	NA	6072	6072	1	257	1	29	29	16
Riaz_Pt34_Pre	melanoma	1	1	1268	3443	3443	3443	223	23	402	86	7551	7551	356	356	356	335	35	14	14	14	8561	903	505327	414	4557	17	17	17	1608	1608	97	85	85	51	574	574	2	2	2	NA	8128	8128	2	199	77	11	11	12
GSM2445716	melanoma	0	NA	NA	NA	NA	NA	NA	NA	696	NA	NA	NA	NA	NA	NA	NA	NA	NA	NA	NA	NA	NA	NA	NA	NA	NA	NA	NA	NA	NA	NA	NA	NA	NA	614	614	NA	NA	NA	NA	5967	5967	NA	NA	NA	NA	NA	NA
GSM2445717	melanoma	0	NA	NA	NA	NA	NA	NA	NA	1433	NA	NA	NA	NA	NA	NA	NA	NA	NA	NA	NA	NA	NA	NA	NA	NA	NA	NA	NA	NA	NA	NA	NA	NA	NA	666	666	NA	NA	NA	NA	3432	3432	NA	NA	NA	NA	NA	NA
GSM2445718	melanoma	0	NA	NA	NA	NA	NA	NA	NA	122	NA	NA	NA	NA	NA	NA	NA	NA	NA	NA	NA	NA	NA	NA	NA	NA	NA	NA	NA	NA	NA	NA	NA	NA	NA	681	681	NA	NA	NA	NA	4063	4063	NA	NA	NA	NA	NA	NA
GSM2445719	melanoma	0	NA	NA	NA	NA	NA	NA	NA	124	NA	NA	NA	NA	NA	NA	NA	NA	NA	NA	NA	NA	NA	NA	NA	NA	NA	NA	NA	NA	NA	NA	NA	NA	NA	684	684	NA	NA	NA	NA	2643	2643	NA	NA	NA	NA	NA	NA
GSM2445720	melanoma	0	NA	NA	NA	NA	NA	NA	NA	58	NA	NA	NA	NA	NA	NA	NA	NA	NA	NA	NA	NA	NA	NA	NA	NA	NA	NA	NA	NA	NA	NA	NA	NA	NA	1726	1726	NA	NA	NA	NA	1950	1950	NA	NA	NA	NA	NA	NA
GSM2445721	melanoma	0	NA	NA	NA	NA	NA	NA	NA	158	NA	NA	NA	NA	NA	NA	NA	NA	NA	NA	NA	NA	NA	NA	NA	NA	NA	NA	NA	NA	NA	NA	NA	NA	NA	593	593	NA	NA	NA	NA	4830	4830	NA	NA	NA	NA	NA	NA
GSM2445722	melanoma	0	NA	NA	NA	NA	NA	NA	NA	355	NA	NA	NA	NA	NA	NA	NA	NA	NA	NA	NA	NA	NA	NA	NA	NA	NA	NA	NA	NA	NA	NA	NA	NA	NA	519	519	NA	NA	NA	NA	9526	9526	NA	NA	NA	NA	NA	NA
GSM2445723	melanoma	0	NA	NA	NA	NA	NA	NA	NA	94	NA	NA	NA	NA	NA	NA	NA	NA	NA	NA	NA	NA	NA	NA	NA	NA	NA	NA	NA	NA	NA	NA	NA	NA	NA	1433	1433	NA	NA	NA	NA	2838	2838	NA	NA	NA	NA	NA	NA
GSM2445724	melanoma	0	NA	NA	NA	NA	NA	NA	NA	378	NA	NA	NA	NA	NA	NA	NA	NA	NA	NA	NA	NA	NA	NA	NA	NA	NA	NA	NA	NA	NA	NA	NA	NA	NA	486	486	NA	NA	NA	NA	3754	3754	NA	NA	NA	NA	NA	NA
GSM2445725	melanoma	0	NA	NA	NA	NA	NA	NA	NA	451	NA	NA	NA	NA	NA	NA	NA	NA	NA	NA	NA	NA	NA	NA	NA	NA	NA	NA	NA	NA	NA	NA	NA	NA	NA	313	313	NA	NA	NA	NA	2535	2535	NA	NA	NA	NA	NA	NA
GSM2445726	melanoma	0	NA	NA	NA	NA	NA	NA	NA	855	NA	NA	NA	NA	NA	NA	NA	NA	NA	NA	NA	NA	NA	NA	NA	NA	NA	NA	NA	NA	NA	NA	NA	NA	NA	949	949	NA	NA	NA	NA	2796	2796	NA	NA	NA	NA	NA	NA
GSM2445727	melanoma	1	NA	NA	NA	NA	NA	NA	NA	496	NA	NA	NA	NA	NA	NA	NA	NA	NA	NA	NA	NA	NA	NA	NA	NA	NA	NA	NA	NA	NA	NA	NA	NA	NA	2680	2680	NA	NA	NA	NA	3109	3109	NA	NA	NA	NA	NA	NA
GSM2445728	melanoma	1	NA	NA	NA	NA	NA	NA	NA	1689	NA	NA	NA	NA	NA	NA	NA	NA	NA	NA	NA	NA	NA	NA	NA	NA	NA	NA	NA	NA	NA	NA	NA	NA	NA	129	129	NA	NA	NA	NA	3754	3754	NA	NA	NA	NA	NA	NA
GSM2445729	melanoma	1	NA	NA	NA	NA	NA	NA	NA	137	NA	NA	NA	NA	NA	NA	NA	NA	NA	NA	NA	NA	NA	NA	NA	NA	NA	NA	NA	NA	NA	NA	NA	NA	NA	232	232	NA	NA	NA	NA	2680	2680	NA	NA	NA	NA	NA	NA
GSM2445730	melanoma	1	NA	NA	NA	NA	NA	NA	NA	249	NA	NA	NA	NA	NA	NA	NA	NA	NA	NA	NA	NA	NA	NA	NA	NA	NA	NA	NA	NA	NA	NA	NA	NA	NA	1492	1492	NA	NA	NA	NA	2118	2118	NA	NA	NA	NA	NA	NA
GSM2445731	melanoma	1	NA	NA	NA	NA	NA	NA	NA	642	NA	NA	NA	NA	NA	NA	NA	NA	NA	NA	NA	NA	NA	NA	NA	NA	NA	NA	NA	NA	NA	NA	NA	NA	NA	30	30	NA	NA	NA	NA	2436	2436	NA	NA	NA	NA	NA	NA
GSM2445732	melanoma	1	NA	NA	NA	NA	NA	NA	NA	134	NA	NA	NA	NA	NA	NA	NA	NA	NA	NA	NA	NA	NA	NA	NA	NA	NA	NA	NA	NA	NA	NA	NA	NA	NA	4514	4514	NA	NA	NA	NA	3373	3373	NA	NA	NA	NA	NA	NA
GSM2445733	melanoma	1	NA	NA	NA	NA	NA	NA	NA	54	NA	NA	NA	NA	NA	NA	NA	NA	NA	NA	NA	NA	NA	NA	NA	NA	NA	NA	NA	NA	NA	NA	NA	NA	NA	201	201	NA	NA	NA	NA	2796	2796	NA	NA	NA	NA	NA	NA
GSM2445734	melanoma	0	NA	NA	NA	NA	NA	NA	NA	687	NA	NA	NA	NA	NA	NA	NA	NA	NA	NA	NA	NA	NA	NA	NA	NA	NA	NA	NA	NA	NA	NA	NA	NA	NA	541	541	NA	NA	NA	NA	3263	3263	NA	NA	NA	NA	NA	NA
GSM2445735	melanoma	0	NA	NA	NA	NA	NA	NA	NA	116	NA	NA	NA	NA	NA	NA	NA	NA	NA	NA	NA	NA	NA	NA	NA	NA	NA	NA	NA	NA	NA	NA	NA	NA	NA	728	728	NA	NA	NA	NA	4234	4234	NA	NA	NA	NA	NA	NA
GSM2445736	melanoma	0	NA	NA	NA	NA	NA	NA	NA	192	NA	NA	NA	NA	NA	NA	NA	NA	NA	NA	NA	NA	NA	NA	NA	NA	NA	NA	NA	NA	NA	NA	NA	NA	NA	462	462	NA	NA	NA	NA	2199	2199	NA	NA	NA	NA	NA	NA
GSM2445737	melanoma	1	NA	NA	NA	NA	NA	NA	NA	2199	NA	NA	NA	NA	NA	NA	NA	NA	NA	NA	NA	NA	NA	NA	NA	NA	NA	NA	NA	NA	NA	NA	NA	NA	NA	196	196	NA	NA	NA	NA	4720	4720	NA	NA	NA	NA	NA	NA
GSM2445738	melanoma	0	NA	NA	NA	NA	NA	NA	NA	410	NA	NA	NA	NA	NA	NA	NA	NA	NA	NA	NA	NA	NA	NA	NA	NA	NA	NA	NA	NA	NA	NA	NA	NA	NA	620	620	NA	NA	NA	NA	5068	5068	NA	NA	NA	NA	NA	NA
GSM2445739	melanoma	0	NA	NA	NA	NA	NA	NA	NA	561	NA	NA	NA	NA	NA	NA	NA	NA	NA	NA	NA	NA	NA	NA	NA	NA	NA	NA	NA	NA	NA	NA	NA	NA	NA	291	291	NA	NA	NA	NA	2045	2045	NA	NA	NA	NA	NA	NA
GSM2445740	melanoma	1	NA	NA	NA	NA	NA	NA	NA	102	NA	NA	NA	NA	NA	NA	NA	NA	NA	NA	NA	NA	NA	NA	NA	NA	NA	NA	NA	NA	NA	NA	NA	NA	NA	118	118	NA	NA	NA	NA	940	940	NA	NA	NA	NA	NA	NA
GSM2069823	melanoma	0	1	420	1350	1350	1350	144	87	1585	522	7374	7374	396	396	396	1342	109	69	69	69	9294	2694	35826	640	3483	61	61	61	256	256	107	268	268	110	3093	3093	1	1	1	1	3507	3507	5	642	19	204	204	30
GSM2069824	melanoma	1	1	338	13402	13402	13402	89	357	657	108	5594	5594	775	775	775	420	84	71	71	71	1185	35	15973	363	3277	16	16	16	157	157	44	2883	2883	92	8514	8514	9	9	9	1	3984	3984	5	604	8	185	185	1
GSM2069825	melanoma	1	1	1134	825	825	825	324	17510	312	6991	9699	9699	788	788	788	1165	73	17	17	17	2023	3943	14110	287	5716	123	123	123	248	248	1851	108	108	972	2727	2727	14	14	14	1	4996	4996	10	755	15	313	313	24
GSM2069826	melanoma	1	1	648	821	821	821	220	226	106	76	10423	10423	121	121	121	1484	130	62	62	62	1615	212	28440	545	5105	2	2	2	229	229	60	131	131	564	370	370	2	2	2	2	3584	3584	17	984	15	230	230	21
GSM2069827	melanoma	1	1	731	1082	1082	1082	257	101	156	112	4507	4507	144	144	144	2068	50	60	60	60	7319	667	23865	544	3137	88	88	88	181	181	88	271	271	66	537	537	10	10	10	1	5685	5685	143	837	2622	22	22	197
GSM2069828	melanoma	0	1	535	1901	1901	1901	469	233	837	1316	6728	6728	1330	1330	1330	1003	56	13	13	13	7143	6466	157526	399	2459	9	9	9	821	821	44	143	143	136	1340	1340	2	2	2	2	9124	9124	7	851	39	718	718	52
GSM2069829	melanoma	1	1	636	2736	2736	2736	167	2490	618	345	7015	7015	690	690	690	689	97	95	95	95	10904	2458	24125	601	2278	46	46	46	133	133	1891	194	194	155	3077	3077	1	1	1	1	7579	7579	6	459	9	216	216	27
GSM2069830	melanoma	1	1	236	1913	1913	1913	148	7	526	154	7143	7143	1196	1196	1196	898	46	528	528	528	7972	1603	22215	470	2875	51	51	51	247	247	70	120	120	211	1274	1274	1	1	1	1	5237	5237	4	593	61	215	215	134
GSM2069831	melanoma	0	1	630	1125	1125	1125	161	57	392	253	8672	8672	1084	1084	1084	960	97	91	91	91	29996	1128	18486	472	2721	192	192	192	197	197	69	262	262	200	15453	15453	1	1	1	1	6900	6900	12	593	91	79	79	87
GSM2069832	melanoma	0	0	108	2331	2331	2331	210	234	2231	176	7532	7532	733	733	733	1339	163	33	33	33	15163	600	20583	380	2966	20	20	20	175	175	149	44	44	52	2591	2591	1	1	1	1	4014	4014	6	542	21	59	59	38
GSM2069833	melanoma	1	1	397	3584	3584	3584	218	56	843	17067	9734	9734	619	619	619	568	69	38	38	38	13181	611	35826	530	3925	1026	1026	1026	263	263	132	179	179	102	6706	6706	1	1	1	1	5004	5004	6	699	17	43	43	22
GSM2069834	melanoma	0	NA	1078	1753	1753	1753	146	23	392	102	9390	9390	911	911	911	3173	67	246	246	246	20318	1156	22328	1554	6536	4222	4222	4222	277	277	87	91	91	144	1677	1677	19	19	19	1	6068	6068	31	1152	19	5	5	27
GSM2069835	melanoma	1	1	393	1386	1386	1386	118	552	656	52	8052	8052	280	280	280	1055	164	34	34	34	3355	510	15657	524	3027	794	794	794	121	121	49	894	894	147	1152	1152	1	1	1	1	5346	5346	5	458	6	370	370	8
GSM2069836	melanoma	0	0	850	2024	2024	2024	251	177	344	131	5579	5579	255	255	255	950	45	25	25	25	4714	312	19351	1125	2456	139	139	139	160	160	1691	369	369	249	3956	3956	2	2	2	2	9680	9680	25	673	1000	2	2	343
GSM2069837	melanoma	1	1	676	2459	2459	2459	779	6235	651	2615	12467	12467	1543	1543	1543	1618	21	11	11	11	19521	4080	21370	255	1559	51	51	51	131	131	85	1661	1661	436	3809	3809	20	20	20	2	12066	12066	9	831	62	380	380	43
GSM2069838	melanoma	0	0	517	3472	3472	3472	180	861	777	83	7570	7570	719	719	719	740	37	35	35	35	3129	635	21172	396	3268	97	97	97	293	293	34	1341	1341	98	407	407	10	10	10	1	3374	3374	1	842	8	235	235	21
GSM2069839	melanoma	0	0	492	2156	2156	2156	198	8765	543	2804	10339	10339	402	402	402	1100	45	12	12	12	18266	4137	25091	390	4956	88	88	88	403	403	636	1930	1930	46	6432	6432	15	15	15	1	4922	4922	6	555	23	95	95	16
GSM2069840	melanoma	0	0	684	2581	2581	2581	107	4168	410	72	6900	6900	918	918	918	780	87	32	32	32	13706	1715	24255	699	4546	60	60	60	209	209	80	473	473	255	1122	1122	9	9	9	1	5599	5599	7	560	73	226	226	188
GSM2069841	melanoma	0	0	792	2401	2401	2401	303	11831	276	52	8645	8645	831	831	831	897	43	20	20	20	6578	4064	11917	647	1927	34	34	34	101	101	940	7720	7720	1738	1485	1485	2	2	2	2	7456	7456	273	1013	11	12	12	150
GSM2069842	melanoma	1	1	608	3278	3278	3278	150	70	169	132	5850	5850	435	435	435	2071	53	41	41	41	8339	908	17187	735	6110	28	28	28	245	245	57	148	148	102	1289	1289	19	19	19	1	5791	5791	9	599	10	150	150	8
GSM2069843	melanoma	1	1	561	2265	2265	2265	170	72	135	152	4887	4887	339	339	339	1677	67	14	14	14	6063	386	16306	691	5599	1	1	1	174	174	38	90	90	123	2613	2613	10	10	10	1	5305	5305	1	547	6	177	177	7
GSM2069844	melanoma	1	1	1318	2108	2108	2108	72	36	94	51	5008	5008	280	280	280	1343	47	7133	7133	7133	4441	508	13477	665	2091	26	26	26	186	186	26	148	148	1909	5690	5690	1	1	1	1	4429	4429	4	657	1298	141	141	552
GSM2069845	melanoma	0	0	267	1423	1423	1423	124	36	180	50	7438	7438	355	355	355	1182	41	1231	1231	1231	3638	434	15163	685	6642	100	100	100	287	287	28	3322	3322	56	1120	1120	1	1	1	1	4787	4787	6	814	57	161	161	10
GSM2069846	melanoma	0	1	943	2965	2965	2965	406	2494	159	38	6952	6952	376	376	376	1686	51	61	61	61	13987	1278	15605	497	3047	398	398	398	77	77	532	1163	1163	448	2695	2695	2	2	2	2	10746	10746	104	524	280	133	133	11
GSM2069847	melanoma	0	0	380	1994	1994	1994	336	49	156	169	9558	9558	728	728	728	1376	85	27	27	27	48793	9506	13669	865	4194	3029	3029	3029	109	109	775	767	767	346	2813	2813	2	2	2	2	4903	4903	2	792	8	284	284	128
GSM2069848	melanoma	1	1	466	1798	1798	1798	246	13181	931	70	8975	8975	422	422	422	2002	48	24	24	24	5505	977	10508	535	5985	226	226	226	195	195	57	1180	1180	90	240	240	2	2	2	2	6515	6515	2	731	21	292	292	21
GSM2069849	melanoma	1	1	526	1453	1453	1453	241	722	97	48	8539	8539	184	184	184	1444	116	110	110	110	2842	191	18629	682	4061	45	45	45	78	78	33	175	175	514	966	966	2	2	2	2	5985	5985	47	1004	16	39	39	27
GSM2069850	melanoma	1	1	1031	2592	2592	2592	124	41	324	69	9078	9078	590	590	590	877	69	113	113	113	2573	220	14891	1146	4949	64	64	64	639	639	126	84	84	84	3910	3910	13	13	13	2	4884	4884	7	784	2	2	2	35
GSM5049348	melanoma	1	NA	NA	NA	NA	NA	NA	NA	NA	NA	NA	NA	NA	NA	NA	NA	NA	NA	NA	NA	NA	NA	NA	NA	NA	1	1	1	NA	NA	NA	NA	NA	NA	739	739	NA	NA	NA	NA	NA	NA	NA	NA	NA	NA	NA	NA
GSM5049349	melanoma	1	NA	NA	NA	NA	NA	NA	NA	NA	NA	NA	NA	NA	NA	NA	NA	NA	NA	NA	NA	NA	NA	NA	NA	NA	5	5	5	NA	NA	NA	NA	NA	NA	212	212	NA	NA	NA	NA	NA	NA	NA	NA	NA	NA	NA	NA
GSM5049350	melanoma	1	NA	NA	NA	NA	NA	NA	NA	NA	NA	NA	NA	NA	NA	NA	NA	NA	NA	NA	NA	NA	NA	NA	NA	NA	107	107	107	NA	NA	NA	NA	NA	NA	610	610	NA	NA	NA	NA	NA	NA	NA	NA	NA	NA	NA	NA
GSM5049351	melanoma	1	NA	NA	NA	NA	NA	NA	NA	NA	NA	NA	NA	NA	NA	NA	NA	NA	NA	NA	NA	NA	NA	NA	NA	NA	1	1	1	NA	NA	NA	NA	NA	NA	716	716	NA	NA	NA	NA	NA	NA	NA	NA	NA	NA	NA	NA
GSM5049352	melanoma	1	NA	NA	NA	NA	NA	NA	NA	NA	NA	NA	NA	NA	NA	NA	NA	NA	NA	NA	NA	NA	NA	NA	NA	NA	1	1	1	NA	NA	NA	NA	NA	NA	1789	1789	NA	NA	NA	NA	NA	NA	NA	NA	NA	NA	NA	NA
GSM5049353	melanoma	1	NA	NA	NA	NA	NA	NA	NA	NA	NA	NA	NA	NA	NA	NA	NA	NA	NA	NA	NA	NA	NA	NA	NA	NA	1	1	1	NA	NA	NA	NA	NA	NA	1431	1431	NA	NA	NA	NA	NA	NA	NA	NA	NA	NA	NA	NA
GSM5049354	melanoma	1	NA	NA	NA	NA	NA	NA	NA	NA	NA	NA	NA	NA	NA	NA	NA	NA	NA	NA	NA	NA	NA	NA	NA	NA	17	17	17	NA	NA	NA	NA	NA	NA	1861	1861	NA	NA	NA	NA	NA	NA	NA	NA	NA	NA	NA	NA
GSM5049355	melanoma	1	NA	NA	NA	NA	NA	NA	NA	NA	NA	NA	NA	NA	NA	NA	NA	NA	NA	NA	NA	NA	NA	NA	NA	NA	6	6	6	NA	NA	NA	NA	NA	NA	243	243	NA	NA	NA	NA	NA	NA	NA	NA	NA	NA	NA	NA
GSM5049356	melanoma	1	NA	NA	NA	NA	NA	NA	NA	NA	NA	NA	NA	NA	NA	NA	NA	NA	NA	NA	NA	NA	NA	NA	NA	NA	9	9	9	NA	NA	NA	NA	NA	NA	502	502	NA	NA	NA	NA	NA	NA	NA	NA	NA	NA	NA	NA
GSM5049357	melanoma	1	NA	NA	NA	NA	NA	NA	NA	NA	NA	NA	NA	NA	NA	NA	NA	NA	NA	NA	NA	NA	NA	NA	NA	NA	4	4	4	NA	NA	NA	NA	NA	NA	630	630	NA	NA	NA	NA	NA	NA	NA	NA	NA	NA	NA	NA
GSM5049358	melanoma	1	NA	NA	NA	NA	NA	NA	NA	NA	NA	NA	NA	NA	NA	NA	NA	NA	NA	NA	NA	NA	NA	NA	NA	NA	54	54	54	NA	NA	NA	NA	NA	NA	519	519	NA	NA	NA	NA	NA	NA	NA	NA	NA	NA	NA	NA
GSM5049359	melanoma	1	NA	NA	NA	NA	NA	NA	NA	NA	NA	NA	NA	NA	NA	NA	NA	NA	NA	NA	NA	NA	NA	NA	NA	NA	2	2	2	NA	NA	NA	NA	NA	NA	486	486	NA	NA	NA	NA	NA	NA	NA	NA	NA	NA	NA	NA
GSM5049360	melanoma	0	NA	NA	NA	NA	NA	NA	NA	NA	NA	NA	NA	NA	NA	NA	NA	NA	NA	NA	NA	NA	NA	NA	NA	NA	322	322	322	NA	NA	NA	NA	NA	NA	73	73	NA	NA	NA	NA	NA	NA	NA	NA	NA	NA	NA	NA
GSM5049361	melanoma	0	NA	NA	NA	NA	NA	NA	NA	NA	NA	NA	NA	NA	NA	NA	NA	NA	NA	NA	NA	NA	NA	NA	NA	NA	3	3	3	NA	NA	NA	NA	NA	NA	502	502	NA	NA	NA	NA	NA	NA	NA	NA	NA	NA	NA	NA
GSM5049362	melanoma	0	NA	NA	NA	NA	NA	NA	NA	NA	NA	NA	NA	NA	NA	NA	NA	NA	NA	NA	NA	NA	NA	NA	NA	NA	2	2	2	NA	NA	NA	NA	NA	NA	924	924	NA	NA	NA	NA	NA	NA	NA	NA	NA	NA	NA	NA
GSM5049363	melanoma	0	NA	NA	NA	NA	NA	NA	NA	NA	NA	NA	NA	NA	NA	NA	NA	NA	NA	NA	NA	NA	NA	NA	NA	NA	1	1	1	NA	NA	NA	NA	NA	NA	2527	2527	NA	NA	NA	NA	NA	NA	NA	NA	NA	NA	NA	NA
GSM5049364	melanoma	0	NA	NA	NA	NA	NA	NA	NA	NA	NA	NA	NA	NA	NA	NA	NA	NA	NA	NA	NA	NA	NA	NA	NA	NA	1	1	1	NA	NA	NA	NA	NA	NA	693	693	NA	NA	NA	NA	NA	NA	NA	NA	NA	NA	NA	NA
GSM5049365	melanoma	0	NA	NA	NA	NA	NA	NA	NA	NA	NA	NA	NA	NA	NA	NA	NA	NA	NA	NA	NA	NA	NA	NA	NA	NA	13	13	13	NA	NA	NA	NA	NA	NA	1656	1656	NA	NA	NA	NA	NA	NA	NA	NA	NA	NA	NA	NA
GSM5049366	melanoma	0	NA	NA	NA	NA	NA	NA	NA	NA	NA	NA	NA	NA	NA	NA	NA	NA	NA	NA	NA	NA	NA	NA	NA	NA	1	1	1	NA	NA	NA	NA	NA	NA	58	58	NA	NA	NA	NA	NA	NA	NA	NA	NA	NA	NA	NA
GSM5049367	melanoma	0	NA	NA	NA	NA	NA	NA	NA	NA	NA	NA	NA	NA	NA	NA	NA	NA	NA	NA	NA	NA	NA	NA	NA	NA	13	13	13	NA	NA	NA	NA	NA	NA	787	787	NA	NA	NA	NA	NA	NA	NA	NA	NA	NA	NA	NA
GSM5049368	melanoma	0	NA	NA	NA	NA	NA	NA	NA	NA	NA	NA	NA	NA	NA	NA	NA	NA	NA	NA	NA	NA	NA	NA	NA	NA	48	48	48	NA	NA	NA	NA	NA	NA	195	195	NA	NA	NA	NA	NA	NA	NA	NA	NA	NA	NA	NA
GSM5049369	melanoma	0	NA	NA	NA	NA	NA	NA	NA	NA	NA	NA	NA	NA	NA	NA	NA	NA	NA	NA	NA	NA	NA	NA	NA	NA	5	5	5	NA	NA	NA	NA	NA	NA	136	136	NA	NA	NA	NA	NA	NA	NA	NA	NA	NA	NA	NA
GSM5049370	melanoma	0	NA	NA	NA	NA	NA	NA	NA	NA	NA	NA	NA	NA	NA	NA	NA	NA	NA	NA	NA	NA	NA	NA	NA	NA	17	17	17	NA	NA	NA	NA	NA	NA	2655	2655	NA	NA	NA	NA	NA	NA	NA	NA	NA	NA	NA	NA
GSM5049371	melanoma	0	NA	NA	NA	NA	NA	NA	NA	NA	NA	NA	NA	NA	NA	NA	NA	NA	NA	NA	NA	NA	NA	NA	NA	NA	4	4	4	NA	NA	NA	NA	NA	NA	248	248	NA	NA	NA	NA	NA	NA	NA	NA	NA	NA	NA	NA
GSM3190464	melanoma	0	NA	509	2123	2123	2123	211	693	117	124	8	8	13	13	13	2102	209	32	32	32	2877	355	43769	44	4270	142	142	142	199	199	7	34509	34509	167	929	929	1	1	1	NA	2570	2570	6	304	132	1	1	36
GSM3190466	melanoma	1	NA	425	120	120	120	80	27	661	267	1	1	27	27	27	1302	181	25	25	25	5842	554	24945	435	19955	1874	1874	1874	2322	2322	36	14	14	56	478	478	129	129	129	NA	642	642	4	872	4	63	63	7
GSM3190468	melanoma	0	NA	485	151	151	151	63	538	144	473	10	10	16	16	16	1488	96	10	10	10	8392	2332	15098	460	17541	28	28	28	3035	3035	33	145	145	202	809	809	13	13	13	NA	1736	1736	6	486	1	45	45	16
GSM3190470	melanoma	0	NA	1193	173	173	173	83	157	134	346	9	9	15	15	15	4283	166	273	273	273	11919	984	9163	623	23451	6	6	6	517	517	19	230	230	651	636	636	12	12	12	NA	1702	1702	320	503	106	43	43	41
GSM3190472	melanoma	0	NA	276	1399	1399	1399	271	1102	77	94	6	6	20	20	20	2386	46	14	14	14	18483	3926	62875	101	6321	5	5	5	300	300	49	125	125	60	3730	3730	4	4	4	NA	2850	2850	1	254	29	13	13	3
GSM3190474	melanoma	0	NA	562	230	230	230	127	27	319	96	2	2	2	2	2	2612	187	14	14	14	995	69	28463	507	18084	87	87	87	2096	2096	5301	93	93	53	438	438	2	2	2	NA	2492	2492	2	544	53	8	8	232
GSM3190476	melanoma	0	NA	501	87	87	87	90	67880	138	12915	2	2	11	11	11	1845	248	8	8	8	1238	222	6351	881	8849	24	24	24	1003	1003	281	26	26	41	803	803	2	2	2	NA	2552	2552	7	573	2	282	282	19
GSM3190479	melanoma	1	NA	355	2133	2133	2133	267	95	892	1375	8	8	20	20	20	2014	31	26	26	26	7319	797	29962	124	6344	36	36	36	307	307	44	463	463	67	3048	3048	19	19	19	NA	3179	3179	1	261	11	75	75	13
GSM3190481	melanoma	0	NA	547	98	98	98	104	28	364	212	17	17	101	101	101	1317	145	8	8	8	3576	441	12686	671	15945	2	2	2	747	747	204	6061	6061	82	769	769	13	13	13	NA	2059	2059	21	709	32	2	2	10
GSM3190484	melanoma	0	NA	872	897	897	897	189	1046	86	519	3	3	11	11	11	1447	53	71	71	71	38803	9543	22282	24	4319	24	24	24	185	185	31	727	727	413	5715	5715	13	13	13	NA	2261	2261	4	234	6	155	155	11
GSM3190485	melanoma	0	NA	682	935	935	935	128	797	95	247	3	3	7	7	7	2022	83	139	139	139	18562	1930	19755	52	6197	25	25	25	187	187	11	392	392	691	3754	3754	8	8	8	NA	2604	2604	6	286	44	259	259	11
GSM3190487	melanoma	0	NA	521	1525	1525	1525	334	86	201	91	28	28	8	8	8	2566	96	11	11	11	5904	205	66108	140	4690	31	31	31	370	370	3298	203	203	100	1296	1296	1	1	1	NA	3623	3623	5	372	53	48	48	268
GSM3190494	melanoma	0	NA	547	489	489	489	146	123763	185	4532	1	1	23	23	23	2191	105	22	22	22	8623	1046	14691	210	3269	17	17	17	224	224	207	167	167	140	4884	4884	1	1	1	NA	2919	2919	7	336	1	669	669	21
GSM3190495	melanoma	0	NA	654	277	277	277	136	76765	197	6262	1	1	10	10	10	2067	174	13	13	13	4745	791	11029	194	4521	7	7	7	301	301	390	61	61	121	5842	5842	8	8	8	NA	2090	2090	1	479	5	647	647	17
Van_Pat02	melanoma	1	1	5661	1438	1438	1438	1816	40	408	169	3739	3739	1095	1095	1095	80	12	9	9	9	82653	4827	75005	682	2055	2	2	2	2380	2380	65	60	60	29	13296	13296	2	2	2	NA	19950	19950	2	464	13	24	24	2
Van_Pat03	melanoma	0	0	2752	85	85	85	666	44	225	270	1030	1030	106	106	106	132	22	119	119	119	60443	986	10517	778	2127	5	5	5	2273	2273	22	19	19	59	2189	2189	4	4	4	NA	10431	10431	1	351	51	56	56	56
Van_Pat04	melanoma	1	1	467	230	230	230	962	70	215	48	1577	1577	657	657	657	581	76	14	14	14	12760	305	48579	432	2023	2	2	2	731	731	50	21	21	30	1517	1517	2	2	2	NA	22793	22793	2	504	2	32	32	14
Van_Pat06	melanoma	0	0	3224	211	211	211	1420	31	250	59	1436	1436	233	233	233	88	37	5	5	5	50771	1910	19257	1211	1630	9	9	9	4524	4524	50	13	13	8	5090	5090	1	1	1	NA	10988	10988	1	474	1	6	6	30
Van_Pat08	melanoma	0	0	2253	161	161	161	644	512	407	310	2100	2100	144	144	144	166	66	8	8	8	22110	134	24148	970	2061	56	56	56	1736	1736	14	44	44	6	2985	2985	1	1	1	NA	10626	10626	1	584	1	25	25	250
Van_Pat14	melanoma	0	0	3779	141	141	141	812	65	177	71	2515	2515	217	217	217	159	39	11	11	11	25892	2597	6911	1465	2798	46	46	46	1393	1393	40	39	39	50	6043	6043	5	5	5	NA	20402	20402	1	329	9	28	28	12
Van_Pat15	melanoma	0	0	194	172	172	172	634	11279	103	1282	1523	1523	262	262	262	272	88	13	13	13	8587	415	11741	983	1849	18	18	18	185	185	975	54	54	25	6031	6031	2	2	2	NA	28515	28515	2	280	8	120	120	56
Van_Pat16	melanoma	0	1	489	75	75	75	609	316	56	148	833	833	118	118	118	197	132	2	2	2	2719	107	4780	1012	3059	33	33	33	1714	1714	9	34	34	2	292	292	2	2	2	NA	6121	6121	2	688	2	2	2	20
Van_Pat19	melanoma	0	0	2668	256	256	256	749	80	397	1556	2861	2861	444	444	444	122	41	9	9	9	62956	2259	33843	634	2357	7	7	7	5820	5820	234	25	25	8	2312	2312	1	1	1	NA	24016	24016	1	482	7	24	24	17
Van_Pat20	melanoma	0	0	1545	90	90	90	1189	2317	77	186	1214	1214	306	306	306	129	79	7	7	7	4985	244	4149	2369	6380	51	51	51	2218	2218	533	24	24	35	4831	4831	2	2	2	NA	14462	14462	6	626	10	2	2	32
Van_Pat25	melanoma	0	0	3108	79	79	79	538	6752	94	2885	1577	1577	112	112	112	133	85	9	9	9	8260	486	4876	1201	2495	6	6	6	599	599	490	117	117	1	1046	1046	1	1	1	NA	13713	13713	1	683	5	44	44	51
Van_Pat27	melanoma	0	1	4175	399	399	399	874	3354	299	263	2109	2109	160	160	160	148	44	14	14	14	34439	1261	35031	694	2290	27	27	27	2915	2915	43	50	50	22	700	700	12	12	12	NA	22793	22793	1	346	30	72	72	7
Van_Pat28	melanoma	0	1	3048	274	274	274	1150	147	161	134	2035	2035	149	149	149	185	33	9	9	9	1993	61	14207	1195	2939	125	125	125	1425	1425	253	42	42	15	976	976	1	1	1	NA	16057	16057	8	657	1	37	37	15
Van_Pat29	melanoma	1	1	4661	71	71	71	1176	98	380	98	1833	1833	402	402	402	163	21	11	11	11	10940	93	9184	637	3403	49	49	49	2453	2453	10	48	48	8	1347	1347	1	1	1	NA	21268	21268	3	407	1	12	12	20
Van_Pat33	melanoma	0	0	2867	235	235	235	1943	30	213	524	1874	1874	206	206	206	276	83	17	17	17	6312	156	72862	1223	5437	18	18	18	1121	1121	16	105	105	23	3374	3374	3	3	3	NA	26051	26051	3	529	4	23	23	35
Van_Pat36	melanoma	0	0	3219	163	163	163	658	375	218	10082	2234	2234	314	314	314	151	109	1	1	1	7712	2484	4865	814	5476	6	6	6	1588	1588	101	20	20	14	2718	2718	1	1	1	NA	14163	14163	1	813	1	20	20	117
Van_Pat37	melanoma	0	0	1588	160	160	160	971	131	88	4838	1561	1561	373	373	373	338	109	31	31	31	20131	568	9630	747	8886	9	9	9	920	920	11	42	42	12	1613	1613	2	2	2	NA	15136	15136	7	660	15	54	54	36
Van_Pat38	melanoma	1	1	3136	390	390	390	770	291	441	206	1850	1850	378	378	378	269	50	1	1	1	30087	13835	61617	721	2773	8	8	8	3017	3017	110	54	54	1	1297	1297	1	1	1	NA	33268	33268	9	381	1	18	18	28
Van_Pat39	melanoma	1	1	5717	185	185	185	1463	98	126	308	1713	1713	350	350	350	59	141	2	2	2	57087	2962	11279	1002	2801	69	69	69	10583	10583	89	113	113	2	1740	1740	2	2	2	NA	12306	12306	2	521	2	2	2	15
Van_Pat40	melanoma	0	0	1666	235	235	235	2314	27	315	152	1497	1497	430	430	430	230	42	8	8	8	43433	382	18846	937	3590	77	77	77	1835	1835	53	82	82	1	2604	2604	1	1	1	NA	11853	11853	1	608	6	18	18	13
Van_Pat41	melanoma	0	0	1578	180	180	180	1439	771	293	1518	2491	2491	6	6	6	1155	6	6	6	6	36713	180	15278	771	2286	6	6	6	978	978	6	477	477	180	14142	14142	6	6	6	NA	30579	30579	6	6	6	6	6	6
Van_Pat43	melanoma	0	0	3426	125	125	125	1083	24	328	321	1559	1559	191	191	191	57	63	2	2	2	56059	3796	13713	1458	3333	27	27	27	8432	8432	187	63	63	2	7772	7772	2	2	2	NA	8629	8629	7	548	2	35	35	23
Van_Pat44	melanoma	0	0	2575	199	199	199	715	1163	97	150	1906	1906	78	78	78	354	139	39	39	39	12498	120	6467	1239	3087	2	2	2	1942	1942	34	27	27	33	7273	7273	2	2	2	NA	14163	14163	21	707	2	86	86	62
Van_Pat45	melanoma	0	0	4491	127	127	127	1094	17361	254	2688	2770	2770	177	177	177	248	50	2	2	2	21268	154	5903	1137	2878	12	12	12	895	895	8	57	57	35	4671	4671	2	2	2	NA	37829	37829	2	765	12	18	18	37
Van_Pat46	melanoma	0	0	3306	139	139	139	1293	32	116	669	1787	1787	296	296	296	172	75	14	14	14	31847	1474	11519	822	3976	143	143	143	3520	3520	33	29	29	9	20043	20043	5	5	5	NA	11464	11464	1	780	1	14	14	28
Van_Pat47	melanoma	1	1	2585	176	176	176	647	113	981	43	3416	3416	121	121	121	142	64	9	9	9	5707	160	55101	1112	2161	65	65	65	380	380	22	58	58	58	9648	9648	2	2	2	NA	18113	18113	2	507	9	82	82	18
Van_Pat49	melanoma	1	1	3930	158	158	158	579	606	207	99	1510	1510	150	150	150	99	38	59	59	59	6279	83	9525	708	2244	7	7	7	3686	3686	15	24	24	8	1163	1163	8	8	8	NA	17976	17976	1	510	5	39	39	13
Van_Pat50	melanoma	0	0	2057	293	293	293	857	2465	1166	94	1517	1517	133	133	133	246	137	11	11	11	9666	169	14121	656	2228	40	40	40	1253	1253	38	226	226	9	994	994	1	1	1	NA	17976	17976	1	615	1	51	51	50
Van_Pat79	melanoma	1	1	910	102	102	102	1397	58	392	89	2569	2569	250	250	250	233	140	2	2	2	10411	338	9231	575	2732	184	184	184	766	766	42	77	77	12	21474	21474	2	2	2	NA	22793	22793	2	588	2	11	11	16
Van_Pat80	melanoma	1	1	2659	389	389	389	693	507	324	139	2279	2279	166	166	166	219	60	8	8	8	16503	508	22005	1013	2860	22	22	22	1454	1454	43	21	21	15	3130	3130	6	6	6	NA	51554	51554	1	290	11	37	37	25
Van_Pat81	melanoma	0	1	1735	164	164	164	728	40	453	125	2465	2465	351	351	351	125	49	7	7	7	13258	299	24558	1770	1870	12	12	12	2535	2535	23	79	79	11	10203	10203	7	7	7	NA	24016	24016	2	609	7	28	28	12
Van_Pat83	melanoma	0	1	3483	183	183	183	1009	225	297	88	2952	2952	251	251	251	119	91	1	1	1	14036	115	15326	1246	1975	9	9	9	2464	2464	147	1676	1676	9	573	573	1	1	1	NA	20674	20674	19	455	7	1	1	5
Van_Pat85	melanoma	0	1	4330	629	629	629	1034	27	286	62	1544	1544	334	334	334	97	31	12	12	12	43433	1078	23628	811	4046	1218	1218	1218	6406	6406	32	16	16	4	13258	13258	1	1	1	NA	12336	12336	1	427	1	17	17	36
Van_Pat86	melanoma	0	0	1900	168	168	168	796	1788	234	712	2376	2376	203	203	203	149	52	18	18	18	15424	98	13146	1177	1826	22	22	22	1541	1541	33	33	33	7	2625	2625	1	1	1	NA	20773	20773	1	553	1	35	35	32
Van_Pat88	melanoma	1	1	3358	425	425	425	1603	73	136	103	1741	1741	326	326	326	146	54	16	16	16	6007	122	12401	1053	5150	15	15	15	4097	4097	8	167	167	11	2847	2847	1	1	1	NA	15682	15682	9	632	1	51	51	14
Van_Pat90	melanoma	1	1	2467	272	272	272	923	525	333	87	2469	2469	295	295	295	264	41	8	8	8	23022	178	7291	2005	2917	11	11	11	2548	2548	145	62	62	30	1116	1116	1	1	1	NA	20312	20312	8	633	5	31	31	18
Van_Pat91	melanoma	1	1	2504	174	174	174	638	4057	85	88	1252	1252	280	280	280	368	21	13	13	13	25567	240	10453	462	4466	5	5	5	2303	2303	28	78	78	1	25417	25417	1	1	1	NA	16624	16624	8	424	1	12	12	6
Van_Pat98	melanoma	0	0	976	212	212	212	1266	668	574	83	2739	2739	222	222	222	156	64	5	5	5	11853	218	8696	1048	2528	96	96	96	1897	1897	27	396	396	25	2532	2532	1	1	1	NA	19595	19595	1	682	1	12	12	44
Van_Pat118	melanoma	0	0	2257	147	147	147	586	51	377	280	1507	1507	243	243	243	78	75	1	1	1	21073	1188	6896	1312	3843	30	30	30	9017	9017	144	87	87	1	3953	3953	1	1	1	NA	9215	9215	1	554	1	10	10	1
Van_Pat119	melanoma	0	1	1247	126	126	126	1254	494	919	146	2246	2246	195	195	195	83	146	2	2	2	2085	97	5281	1054	4448	17	17	17	2883	2883	8	33	33	2	1174	1174	2	2	2	NA	16803	16803	2	472	2	50	50	143
Van_Pat123	melanoma	1	1	1751	116	116	116	770	81	379	82	1343	1343	77	77	77	121	157	16	16	16	6980	45	4152	1798	4737	19	19	19	3045	3045	21	23	23	16	14121	14121	2	2	2	NA	12563	12563	2	430	2	39	39	38
Van_Pat126	melanoma	1	1	1013	274	274	274	642	91	167	95	1424	1424	133	133	133	171	105	15	15	15	12120	316	19950	1765	4295	22	22	22	2144	2144	46	25	25	21	5009	5009	1	1	1	NA	22564	22564	1	351	1	8	8	44
U_CRI227	melanoma	0	NA	NA	NA	NA	NA	NA	NA	NA	NA	NA	NA	NA	NA	NA	NA	NA	NA	NA	NA	NA	NA	NA	NA	NA	NA	NA	NA	NA	NA	NA	NA	NA	NA	NA	NA	NA	NA	NA	NA	NA	NA	NA	NA	NA	NA	NA	NA
U_CRI228	melanoma	0	NA	NA	NA	NA	NA	NA	NA	NA	NA	NA	NA	NA	NA	NA	NA	NA	NA	NA	NA	NA	NA	NA	NA	NA	NA	NA	NA	NA	NA	NA	NA	NA	NA	NA	NA	NA	NA	NA	NA	NA	NA	NA	NA	NA	NA	NA	NA
U_CRI230	melanoma	0	NA	NA	NA	NA	NA	NA	NA	NA	NA	NA	NA	NA	NA	NA	NA	NA	NA	NA	NA	NA	NA	NA	NA	NA	NA	NA	NA	NA	NA	NA	NA	NA	NA	NA	NA	NA	NA	NA	NA	NA	NA	NA	NA	NA	NA	NA	NA
U_CRI231	melanoma	1	NA	NA	NA	NA	NA	NA	NA	NA	NA	NA	NA	NA	NA	NA	NA	NA	NA	NA	NA	NA	NA	NA	NA	NA	NA	NA	NA	NA	NA	NA	NA	NA	NA	NA	NA	NA	NA	NA	NA	NA	NA	NA	NA	NA	NA	NA	NA
U_CRI232	melanoma	1	NA	NA	NA	NA	NA	NA	NA	NA	NA	NA	NA	NA	NA	NA	NA	NA	NA	NA	NA	NA	NA	NA	NA	NA	NA	NA	NA	NA	NA	NA	NA	NA	NA	NA	NA	NA	NA	NA	NA	NA	NA	NA	NA	NA	NA	NA	NA
U_CRI233	melanoma	0	NA	NA	NA	NA	NA	NA	NA	NA	NA	NA	NA	NA	NA	NA	NA	NA	NA	NA	NA	NA	NA	NA	NA	NA	NA	NA	NA	NA	NA	NA	NA	NA	NA	NA	NA	NA	NA	NA	NA	NA	NA	NA	NA	NA	NA	NA	NA
U_CRI234	melanoma	0	NA	NA	NA	NA	NA	NA	NA	NA	NA	NA	NA	NA	NA	NA	NA	NA	NA	NA	NA	NA	NA	NA	NA	NA	NA	NA	NA	NA	NA	NA	NA	NA	NA	NA	NA	NA	NA	NA	NA	NA	NA	NA	NA	NA	NA	NA	NA
U_CRI235	melanoma	0	NA	NA	NA	NA	NA	NA	NA	NA	NA	NA	NA	NA	NA	NA	NA	NA	NA	NA	NA	NA	NA	NA	NA	NA	NA	NA	NA	NA	NA	NA	NA	NA	NA	NA	NA	NA	NA	NA	NA	NA	NA	NA	NA	NA	NA	NA	NA
U_CRI236	melanoma	0	NA	NA	NA	NA	NA	NA	NA	NA	NA	NA	NA	NA	NA	NA	NA	NA	NA	NA	NA	NA	NA	NA	NA	NA	NA	NA	NA	NA	NA	NA	NA	NA	NA	NA	NA	NA	NA	NA	NA	NA	NA	NA	NA	NA	NA	NA	NA
U_CRI237	melanoma	1	NA	NA	NA	NA	NA	NA	NA	NA	NA	NA	NA	NA	NA	NA	NA	NA	NA	NA	NA	NA	NA	NA	NA	NA	NA	NA	NA	NA	NA	NA	NA	NA	NA	NA	NA	NA	NA	NA	NA	NA	NA	NA	NA	NA	NA	NA	NA
U_CRI238	melanoma	1	NA	NA	NA	NA	NA	NA	NA	NA	NA	NA	NA	NA	NA	NA	NA	NA	NA	NA	NA	NA	NA	NA	NA	NA	NA	NA	NA	NA	NA	NA	NA	NA	NA	NA	NA	NA	NA	NA	NA	NA	NA	NA	NA	NA	NA	NA	NA
U_CRI239	melanoma	0	NA	NA	NA	NA	NA	NA	NA	NA	NA	NA	NA	NA	NA	NA	NA	NA	NA	NA	NA	NA	NA	NA	NA	NA	NA	NA	NA	NA	NA	NA	NA	NA	NA	NA	NA	NA	NA	NA	NA	NA	NA	NA	NA	NA	NA	NA	NA
U_CRI240	melanoma	0	NA	NA	NA	NA	NA	NA	NA	NA	NA	NA	NA	NA	NA	NA	NA	NA	NA	NA	NA	NA	NA	NA	NA	NA	NA	NA	NA	NA	NA	NA	NA	NA	NA	NA	NA	NA	NA	NA	NA	NA	NA	NA	NA	NA	NA	NA	NA
U_CRI241	melanoma	0	NA	NA	NA	NA	NA	NA	NA	NA	NA	NA	NA	NA	NA	NA	NA	NA	NA	NA	NA	NA	NA	NA	NA	NA	NA	NA	NA	NA	NA	NA	NA	NA	NA	NA	NA	NA	NA	NA	NA	NA	NA	NA	NA	NA	NA	NA	NA
U_CRI242	melanoma	1	NA	NA	NA	NA	NA	NA	NA	NA	NA	NA	NA	NA	NA	NA	NA	NA	NA	NA	NA	NA	NA	NA	NA	NA	NA	NA	NA	NA	NA	NA	NA	NA	NA	NA	NA	NA	NA	NA	NA	NA	NA	NA	NA	NA	NA	NA	NA
U_CRI243	melanoma	1	NA	NA	NA	NA	NA	NA	NA	NA	NA	NA	NA	NA	NA	NA	NA	NA	NA	NA	NA	NA	NA	NA	NA	NA	NA	NA	NA	NA	NA	NA	NA	NA	NA	NA	NA	NA	NA	NA	NA	NA	NA	NA	NA	NA	NA	NA	NA
U_CRI244	melanoma	0	NA	NA	NA	NA	NA	NA	NA	NA	NA	NA	NA	NA	NA	NA	NA	NA	NA	NA	NA	NA	NA	NA	NA	NA	NA	NA	NA	NA	NA	NA	NA	NA	NA	NA	NA	NA	NA	NA	NA	NA	NA	NA	NA	NA	NA	NA	NA
U_CRI245	melanoma	1	NA	NA	NA	NA	NA	NA	NA	NA	NA	NA	NA	NA	NA	NA	NA	NA	NA	NA	NA	NA	NA	NA	NA	NA	NA	NA	NA	NA	NA	NA	NA	NA	NA	NA	NA	NA	NA	NA	NA	NA	NA	NA	NA	NA	NA	NA	NA
U_CRI246	melanoma	0	NA	NA	NA	NA	NA	NA	NA	NA	NA	NA	NA	NA	NA	NA	NA	NA	NA	NA	NA	NA	NA	NA	NA	NA	NA	NA	NA	NA	NA	NA	NA	NA	NA	NA	NA	NA	NA	NA	NA	NA	NA	NA	NA	NA	NA	NA	NA
U_CRI247	melanoma	0	NA	NA	NA	NA	NA	NA	NA	NA	NA	NA	NA	NA	NA	NA	NA	NA	NA	NA	NA	NA	NA	NA	NA	NA	NA	NA	NA	NA	NA	NA	NA	NA	NA	NA	NA	NA	NA	NA	NA	NA	NA	NA	NA	NA	NA	NA	NA
U_CRI248	melanoma	0	NA	NA	NA	NA	NA	NA	NA	NA	NA	NA	NA	NA	NA	NA	NA	NA	NA	NA	NA	NA	NA	NA	NA	NA	NA	NA	NA	NA	NA	NA	NA	NA	NA	NA	NA	NA	NA	NA	NA	NA	NA	NA	NA	NA	NA	NA	NA
U_CRI249	melanoma	1	NA	NA	NA	NA	NA	NA	NA	NA	NA	NA	NA	NA	NA	NA	NA	NA	NA	NA	NA	NA	NA	NA	NA	NA	NA	NA	NA	NA	NA	NA	NA	NA	NA	NA	NA	NA	NA	NA	NA	NA	NA	NA	NA	NA	NA	NA	NA
U_CRI250	melanoma	0	NA	NA	NA	NA	NA	NA	NA	NA	NA	NA	NA	NA	NA	NA	NA	NA	NA	NA	NA	NA	NA	NA	NA	NA	NA	NA	NA	NA	NA	NA	NA	NA	NA	NA	NA	NA	NA	NA	NA	NA	NA	NA	NA	NA	NA	NA	NA
U_CRI251	melanoma	0	NA	NA	NA	NA	NA	NA	NA	NA	NA	NA	NA	NA	NA	NA	NA	NA	NA	NA	NA	NA	NA	NA	NA	NA	NA	NA	NA	NA	NA	NA	NA	NA	NA	NA	NA	NA	NA	NA	NA	NA	NA	NA	NA	NA	NA	NA	NA
U_CRI252	melanoma	0	NA	NA	NA	NA	NA	NA	NA	NA	NA	NA	NA	NA	NA	NA	NA	NA	NA	NA	NA	NA	NA	NA	NA	NA	NA	NA	NA	NA	NA	NA	NA	NA	NA	NA	NA	NA	NA	NA	NA	NA	NA	NA	NA	NA	NA	NA	NA
U_CRI253	melanoma	1	NA	NA	NA	NA	NA	NA	NA	NA	NA	NA	NA	NA	NA	NA	NA	NA	NA	NA	NA	NA	NA	NA	NA	NA	NA	NA	NA	NA	NA	NA	NA	NA	NA	NA	NA	NA	NA	NA	NA	NA	NA	NA	NA	NA	NA	NA	NA
U_CRI254	melanoma	0	NA	NA	NA	NA	NA	NA	NA	NA	NA	NA	NA	NA	NA	NA	NA	NA	NA	NA	NA	NA	NA	NA	NA	NA	NA	NA	NA	NA	NA	NA	NA	NA	NA	NA	NA	NA	NA	NA	NA	NA	NA	NA	NA	NA	NA	NA	NA
U_CRI255	melanoma	0	NA	NA	NA	NA	NA	NA	NA	NA	NA	NA	NA	NA	NA	NA	NA	NA	NA	NA	NA	NA	NA	NA	NA	NA	NA	NA	NA	NA	NA	NA	NA	NA	NA	NA	NA	NA	NA	NA	NA	NA	NA	NA	NA	NA	NA	NA	NA
U_CRI256	melanoma	0	NA	NA	NA	NA	NA	NA	NA	NA	NA	NA	NA	NA	NA	NA	NA	NA	NA	NA	NA	NA	NA	NA	NA	NA	NA	NA	NA	NA	NA	NA	NA	NA	NA	NA	NA	NA	NA	NA	NA	NA	NA	NA	NA	NA	NA	NA	NA
U_CRI257	melanoma	0	NA	NA	NA	NA	NA	NA	NA	NA	NA	NA	NA	NA	NA	NA	NA	NA	NA	NA	NA	NA	NA	NA	NA	NA	NA	NA	NA	NA	NA	NA	NA	NA	NA	NA	NA	NA	NA	NA	NA	NA	NA	NA	NA	NA	NA	NA	NA
U_CRI258	melanoma	1	NA	NA	NA	NA	NA	NA	NA	NA	NA	NA	NA	NA	NA	NA	NA	NA	NA	NA	NA	NA	NA	NA	NA	NA	NA	NA	NA	NA	NA	NA	NA	NA	NA	NA	NA	NA	NA	NA	NA	NA	NA	NA	NA	NA	NA	NA	NA
U_CRI261	melanoma	1	NA	NA	NA	NA	NA	NA	NA	NA	NA	NA	NA	NA	NA	NA	NA	NA	NA	NA	NA	NA	NA	NA	NA	NA	NA	NA	NA	NA	NA	NA	NA	NA	NA	NA	NA	NA	NA	NA	NA	NA	NA	NA	NA	NA	NA	NA	NA
U_CRI262	melanoma	0	NA	NA	NA	NA	NA	NA	NA	NA	NA	NA	NA	NA	NA	NA	NA	NA	NA	NA	NA	NA	NA	NA	NA	NA	NA	NA	NA	NA	NA	NA	NA	NA	NA	NA	NA	NA	NA	NA	NA	NA	NA	NA	NA	NA	NA	NA	NA
U_CRI263	melanoma	1	NA	NA	NA	NA	NA	NA	NA	NA	NA	NA	NA	NA	NA	NA	NA	NA	NA	NA	NA	NA	NA	NA	NA	NA	NA	NA	NA	NA	NA	NA	NA	NA	NA	NA	NA	NA	NA	NA	NA	NA	NA	NA	NA	NA	NA	NA	NA
U_CRI264	melanoma	1	NA	NA	NA	NA	NA	NA	NA	NA	NA	NA	NA	NA	NA	NA	NA	NA	NA	NA	NA	NA	NA	NA	NA	NA	NA	NA	NA	NA	NA	NA	NA	NA	NA	NA	NA	NA	NA	NA	NA	NA	NA	NA	NA	NA	NA	NA	NA
U_CRI265	melanoma	0	NA	NA	NA	NA	NA	NA	NA	NA	NA	NA	NA	NA	NA	NA	NA	NA	NA	NA	NA	NA	NA	NA	NA	NA	NA	NA	NA	NA	NA	NA	NA	NA	NA	NA	NA	NA	NA	NA	NA	NA	NA	NA	NA	NA	NA	NA	NA
U_CRI266	melanoma	0	NA	NA	NA	NA	NA	NA	NA	NA	NA	NA	NA	NA	NA	NA	NA	NA	NA	NA	NA	NA	NA	NA	NA	NA	NA	NA	NA	NA	NA	NA	NA	NA	NA	NA	NA	NA	NA	NA	NA	NA	NA	NA	NA	NA	NA	NA	NA
U_CRI267	melanoma	0	NA	NA	NA	NA	NA	NA	NA	NA	NA	NA	NA	NA	NA	NA	NA	NA	NA	NA	NA	NA	NA	NA	NA	NA	NA	NA	NA	NA	NA	NA	NA	NA	NA	NA	NA	NA	NA	NA	NA	NA	NA	NA	NA	NA	NA	NA	NA
U_CRI268	melanoma	1	NA	NA	NA	NA	NA	NA	NA	NA	NA	NA	NA	NA	NA	NA	NA	NA	NA	NA	NA	NA	NA	NA	NA	NA	NA	NA	NA	NA	NA	NA	NA	NA	NA	NA	NA	NA	NA	NA	NA	NA	NA	NA	NA	NA	NA	NA	NA
U_CRI269	melanoma	1	NA	NA	NA	NA	NA	NA	NA	NA	NA	NA	NA	NA	NA	NA	NA	NA	NA	NA	NA	NA	NA	NA	NA	NA	NA	NA	NA	NA	NA	NA	NA	NA	NA	NA	NA	NA	NA	NA	NA	NA	NA	NA	NA	NA	NA	NA	NA
U_CRI270	melanoma	0	NA	NA	NA	NA	NA	NA	NA	NA	NA	NA	NA	NA	NA	NA	NA	NA	NA	NA	NA	NA	NA	NA	NA	NA	NA	NA	NA	NA	NA	NA	NA	NA	NA	NA	NA	NA	NA	NA	NA	NA	NA	NA	NA	NA	NA	NA	NA
U_CRI271	melanoma	1	NA	NA	NA	NA	NA	NA	NA	NA	NA	NA	NA	NA	NA	NA	NA	NA	NA	NA	NA	NA	NA	NA	NA	NA	NA	NA	NA	NA	NA	NA	NA	NA	NA	NA	NA	NA	NA	NA	NA	NA	NA	NA	NA	NA	NA	NA	NA
U_CRI272	melanoma	0	NA	NA	NA	NA	NA	NA	NA	NA	NA	NA	NA	NA	NA	NA	NA	NA	NA	NA	NA	NA	NA	NA	NA	NA	NA	NA	NA	NA	NA	NA	NA	NA	NA	NA	NA	NA	NA	NA	NA	NA	NA	NA	NA	NA	NA	NA	NA
U_CRI273	melanoma	1	NA	NA	NA	NA	NA	NA	NA	NA	NA	NA	NA	NA	NA	NA	NA	NA	NA	NA	NA	NA	NA	NA	NA	NA	NA	NA	NA	NA	NA	NA	NA	NA	NA	NA	NA	NA	NA	NA	NA	NA	NA	NA	NA	NA	NA	NA	NA
U_CRI274	melanoma	0	NA	NA	NA	NA	NA	NA	NA	NA	NA	NA	NA	NA	NA	NA	NA	NA	NA	NA	NA	NA	NA	NA	NA	NA	NA	NA	NA	NA	NA	NA	NA	NA	NA	NA	NA	NA	NA	NA	NA	NA	NA	NA	NA	NA	NA	NA	NA
U_CRI275	melanoma	0	NA	NA	NA	NA	NA	NA	NA	NA	NA	NA	NA	NA	NA	NA	NA	NA	NA	NA	NA	NA	NA	NA	NA	NA	NA	NA	NA	NA	NA	NA	NA	NA	NA	NA	NA	NA	NA	NA	NA	NA	NA	NA	NA	NA	NA	NA	NA
U_CRI276	melanoma	1	NA	NA	NA	NA	NA	NA	NA	NA	NA	NA	NA	NA	NA	NA	NA	NA	NA	NA	NA	NA	NA	NA	NA	NA	NA	NA	NA	NA	NA	NA	NA	NA	NA	NA	NA	NA	NA	NA	NA	NA	NA	NA	NA	NA	NA	NA	NA
U_CRI277	melanoma	0	NA	NA	NA	NA	NA	NA	NA	NA	NA	NA	NA	NA	NA	NA	NA	NA	NA	NA	NA	NA	NA	NA	NA	NA	NA	NA	NA	NA	NA	NA	NA	NA	NA	NA	NA	NA	NA	NA	NA	NA	NA	NA	NA	NA	NA	NA	NA
U_CRI278	melanoma	0	NA	NA	NA	NA	NA	NA	NA	NA	NA	NA	NA	NA	NA	NA	NA	NA	NA	NA	NA	NA	NA	NA	NA	NA	NA	NA	NA	NA	NA	NA	NA	NA	NA	NA	NA	NA	NA	NA	NA	NA	NA	NA	NA	NA	NA	NA	NA
U_CRI279	melanoma	1	NA	NA	NA	NA	NA	NA	NA	NA	NA	NA	NA	NA	NA	NA	NA	NA	NA	NA	NA	NA	NA	NA	NA	NA	NA	NA	NA	NA	NA	NA	NA	NA	NA	NA	NA	NA	NA	NA	NA	NA	NA	NA	NA	NA	NA	NA	NA
U_CRI280	melanoma	0	NA	NA	NA	NA	NA	NA	NA	NA	NA	NA	NA	NA	NA	NA	NA	NA	NA	NA	NA	NA	NA	NA	NA	NA	NA	NA	NA	NA	NA	NA	NA	NA	NA	NA	NA	NA	NA	NA	NA	NA	NA	NA	NA	NA	NA	NA	NA
U_CRI281	melanoma	0	NA	NA	NA	NA	NA	NA	NA	NA	NA	NA	NA	NA	NA	NA	NA	NA	NA	NA	NA	NA	NA	NA	NA	NA	NA	NA	NA	NA	NA	NA	NA	NA	NA	NA	NA	NA	NA	NA	NA	NA	NA	NA	NA	NA	NA	NA	NA
U_CRI282	melanoma	1	NA	NA	NA	NA	NA	NA	NA	NA	NA	NA	NA	NA	NA	NA	NA	NA	NA	NA	NA	NA	NA	NA	NA	NA	NA	NA	NA	NA	NA	NA	NA	NA	NA	NA	NA	NA	NA	NA	NA	NA	NA	NA	NA	NA	NA	NA	NA
U_CRI283	melanoma	1	NA	NA	NA	NA	NA	NA	NA	NA	NA	NA	NA	NA	NA	NA	NA	NA	NA	NA	NA	NA	NA	NA	NA	NA	NA	NA	NA	NA	NA	NA	NA	NA	NA	NA	NA	NA	NA	NA	NA	NA	NA	NA	NA	NA	NA	NA	NA
U_CRI284	melanoma	0	NA	NA	NA	NA	NA	NA	NA	NA	NA	NA	NA	NA	NA	NA	NA	NA	NA	NA	NA	NA	NA	NA	NA	NA	NA	NA	NA	NA	NA	NA	NA	NA	NA	NA	NA	NA	NA	NA	NA	NA	NA	NA	NA	NA	NA	NA	NA
U_CRI285	melanoma	1	NA	NA	NA	NA	NA	NA	NA	NA	NA	NA	NA	NA	NA	NA	NA	NA	NA	NA	NA	NA	NA	NA	NA	NA	NA	NA	NA	NA	NA	NA	NA	NA	NA	NA	NA	NA	NA	NA	NA	NA	NA	NA	NA	NA	NA	NA	NA
U_CRI286	melanoma	0	NA	NA	NA	NA	NA	NA	NA	NA	NA	NA	NA	NA	NA	NA	NA	NA	NA	NA	NA	NA	NA	NA	NA	NA	NA	NA	NA	NA	NA	NA	NA	NA	NA	NA	NA	NA	NA	NA	NA	NA	NA	NA	NA	NA	NA	NA	NA
U_CRI287	melanoma	0	NA	NA	NA	NA	NA	NA	NA	NA	NA	NA	NA	NA	NA	NA	NA	NA	NA	NA	NA	NA	NA	NA	NA	NA	NA	NA	NA	NA	NA	NA	NA	NA	NA	NA	NA	NA	NA	NA	NA	NA	NA	NA	NA	NA	NA	NA	NA
U_CRI288	melanoma	0	NA	NA	NA	NA	NA	NA	NA	NA	NA	NA	NA	NA	NA	NA	NA	NA	NA	NA	NA	NA	NA	NA	NA	NA	NA	NA	NA	NA	NA	NA	NA	NA	NA	NA	NA	NA	NA	NA	NA	NA	NA	NA	NA	NA	NA	NA	NA
U_CRI289	melanoma	1	NA	NA	NA	NA	NA	NA	NA	NA	NA	NA	NA	NA	NA	NA	NA	NA	NA	NA	NA	NA	NA	NA	NA	NA	NA	NA	NA	NA	NA	NA	NA	NA	NA	NA	NA	NA	NA	NA	NA	NA	NA	NA	NA	NA	NA	NA	NA
U_CRI290	melanoma	1	NA	NA	NA	NA	NA	NA	NA	NA	NA	NA	NA	NA	NA	NA	NA	NA	NA	NA	NA	NA	NA	NA	NA	NA	NA	NA	NA	NA	NA	NA	NA	NA	NA	NA	NA	NA	NA	NA	NA	NA	NA	NA	NA	NA	NA	NA	NA
U_CRI291	melanoma	1	NA	NA	NA	NA	NA	NA	NA	NA	NA	NA	NA	NA	NA	NA	NA	NA	NA	NA	NA	NA	NA	NA	NA	NA	NA	NA	NA	NA	NA	NA	NA	NA	NA	NA	NA	NA	NA	NA	NA	NA	NA	NA	NA	NA	NA	NA	NA
U_CRI292	melanoma	0	NA	NA	NA	NA	NA	NA	NA	NA	NA	NA	NA	NA	NA	NA	NA	NA	NA	NA	NA	NA	NA	NA	NA	NA	NA	NA	NA	NA	NA	NA	NA	NA	NA	NA	NA	NA	NA	NA	NA	NA	NA	NA	NA	NA	NA	NA	NA
U_CRI293	melanoma	1	NA	NA	NA	NA	NA	NA	NA	NA	NA	NA	NA	NA	NA	NA	NA	NA	NA	NA	NA	NA	NA	NA	NA	NA	NA	NA	NA	NA	NA	NA	NA	NA	NA	NA	NA	NA	NA	NA	NA	NA	NA	NA	NA	NA	NA	NA	NA
U_CRI294	melanoma	1	NA	NA	NA	NA	NA	NA	NA	NA	NA	NA	NA	NA	NA	NA	NA	NA	NA	NA	NA	NA	NA	NA	NA	NA	NA	NA	NA	NA	NA	NA	NA	NA	NA	NA	NA	NA	NA	NA	NA	NA	NA	NA	NA	NA	NA	NA	NA
U_CRI295	melanoma	0	NA	NA	NA	NA	NA	NA	NA	NA	NA	NA	NA	NA	NA	NA	NA	NA	NA	NA	NA	NA	NA	NA	NA	NA	NA	NA	NA	NA	NA	NA	NA	NA	NA	NA	NA	NA	NA	NA	NA	NA	NA	NA	NA	NA	NA	NA	NA
U_CRI296	melanoma	1	NA	NA	NA	NA	NA	NA	NA	NA	NA	NA	NA	NA	NA	NA	NA	NA	NA	NA	NA	NA	NA	NA	NA	NA	NA	NA	NA	NA	NA	NA	NA	NA	NA	NA	NA	NA	NA	NA	NA	NA	NA	NA	NA	NA	NA	NA	NA
U_CRI297	melanoma	0	NA	NA	NA	NA	NA	NA	NA	NA	NA	NA	NA	NA	NA	NA	NA	NA	NA	NA	NA	NA	NA	NA	NA	NA	NA	NA	NA	NA	NA	NA	NA	NA	NA	NA	NA	NA	NA	NA	NA	NA	NA	NA	NA	NA	NA	NA	NA
U_CRI298	melanoma	0	NA	NA	NA	NA	NA	NA	NA	NA	NA	NA	NA	NA	NA	NA	NA	NA	NA	NA	NA	NA	NA	NA	NA	NA	NA	NA	NA	NA	NA	NA	NA	NA	NA	NA	NA	NA	NA	NA	NA	NA	NA	NA	NA	NA	NA	NA	NA
U_CRI299	melanoma	0	NA	NA	NA	NA	NA	NA	NA	NA	NA	NA	NA	NA	NA	NA	NA	NA	NA	NA	NA	NA	NA	NA	NA	NA	NA	NA	NA	NA	NA	NA	NA	NA	NA	NA	NA	NA	NA	NA	NA	NA	NA	NA	NA	NA	NA	NA	NA
U_CRI300	melanoma	0	NA	NA	NA	NA	NA	NA	NA	NA	NA	NA	NA	NA	NA	NA	NA	NA	NA	NA	NA	NA	NA	NA	NA	NA	NA	NA	NA	NA	NA	NA	NA	NA	NA	NA	NA	NA	NA	NA	NA	NA	NA	NA	NA	NA	NA	NA	NA
U_CRI301	melanoma	0	NA	NA	NA	NA	NA	NA	NA	NA	NA	NA	NA	NA	NA	NA	NA	NA	NA	NA	NA	NA	NA	NA	NA	NA	NA	NA	NA	NA	NA	NA	NA	NA	NA	NA	NA	NA	NA	NA	NA	NA	NA	NA	NA	NA	NA	NA	NA
U_CRI302	melanoma	0	NA	NA	NA	NA	NA	NA	NA	NA	NA	NA	NA	NA	NA	NA	NA	NA	NA	NA	NA	NA	NA	NA	NA	NA	NA	NA	NA	NA	NA	NA	NA	NA	NA	NA	NA	NA	NA	NA	NA	NA	NA	NA	NA	NA	NA	NA	NA
U_CRI303	melanoma	1	NA	NA	NA	NA	NA	NA	NA	NA	NA	NA	NA	NA	NA	NA	NA	NA	NA	NA	NA	NA	NA	NA	NA	NA	NA	NA	NA	NA	NA	NA	NA	NA	NA	NA	NA	NA	NA	NA	NA	NA	NA	NA	NA	NA	NA	NA	NA
U_CRI304	melanoma	1	NA	NA	NA	NA	NA	NA	NA	NA	NA	NA	NA	NA	NA	NA	NA	NA	NA	NA	NA	NA	NA	NA	NA	NA	NA	NA	NA	NA	NA	NA	NA	NA	NA	NA	NA	NA	NA	NA	NA	NA	NA	NA	NA	NA	NA	NA	NA
U_CRI305	melanoma	0	NA	NA	NA	NA	NA	NA	NA	NA	NA	NA	NA	NA	NA	NA	NA	NA	NA	NA	NA	NA	NA	NA	NA	NA	NA	NA	NA	NA	NA	NA	NA	NA	NA	NA	NA	NA	NA	NA	NA	NA	NA	NA	NA	NA	NA	NA	NA
U_CRI306	melanoma	1	NA	NA	NA	NA	NA	NA	NA	NA	NA	NA	NA	NA	NA	NA	NA	NA	NA	NA	NA	NA	NA	NA	NA	NA	NA	NA	NA	NA	NA	NA	NA	NA	NA	NA	NA	NA	NA	NA	NA	NA	NA	NA	NA	NA	NA	NA	NA
U_CRI307	melanoma	1	NA	NA	NA	NA	NA	NA	NA	NA	NA	NA	NA	NA	NA	NA	NA	NA	NA	NA	NA	NA	NA	NA	NA	NA	NA	NA	NA	NA	NA	NA	NA	NA	NA	NA	NA	NA	NA	NA	NA	NA	NA	NA	NA	NA	NA	NA	NA
U_CRI308	melanoma	1	NA	NA	NA	NA	NA	NA	NA	NA	NA	NA	NA	NA	NA	NA	NA	NA	NA	NA	NA	NA	NA	NA	NA	NA	NA	NA	NA	NA	NA	NA	NA	NA	NA	NA	NA	NA	NA	NA	NA	NA	NA	NA	NA	NA	NA	NA	NA
U_CRI309	melanoma	1	NA	NA	NA	NA	NA	NA	NA	NA	NA	NA	NA	NA	NA	NA	NA	NA	NA	NA	NA	NA	NA	NA	NA	NA	NA	NA	NA	NA	NA	NA	NA	NA	NA	NA	NA	NA	NA	NA	NA	NA	NA	NA	NA	NA	NA	NA	NA
U_CRI310	melanoma	0	NA	NA	NA	NA	NA	NA	NA	NA	NA	NA	NA	NA	NA	NA	NA	NA	NA	NA	NA	NA	NA	NA	NA	NA	NA	NA	NA	NA	NA	NA	NA	NA	NA	NA	NA	NA	NA	NA	NA	NA	NA	NA	NA	NA	NA	NA	NA
U_CRI311	melanoma	0	NA	NA	NA	NA	NA	NA	NA	NA	NA	NA	NA	NA	NA	NA	NA	NA	NA	NA	NA	NA	NA	NA	NA	NA	NA	NA	NA	NA	NA	NA	NA	NA	NA	NA	NA	NA	NA	NA	NA	NA	NA	NA	NA	NA	NA	NA	NA
U_CRI312	melanoma	1	NA	NA	NA	NA	NA	NA	NA	NA	NA	NA	NA	NA	NA	NA	NA	NA	NA	NA	NA	NA	NA	NA	NA	NA	NA	NA	NA	NA	NA	NA	NA	NA	NA	NA	NA	NA	NA	NA	NA	NA	NA	NA	NA	NA	NA	NA	NA
U_CRI313	melanoma	1	NA	NA	NA	NA	NA	NA	NA	NA	NA	NA	NA	NA	NA	NA	NA	NA	NA	NA	NA	NA	NA	NA	NA	NA	NA	NA	NA	NA	NA	NA	NA	NA	NA	NA	NA	NA	NA	NA	NA	NA	NA	NA	NA	NA	NA	NA	NA
U_CRI314	melanoma	1	NA	NA	NA	NA	NA	NA	NA	NA	NA	NA	NA	NA	NA	NA	NA	NA	NA	NA	NA	NA	NA	NA	NA	NA	NA	NA	NA	NA	NA	NA	NA	NA	NA	NA	NA	NA	NA	NA	NA	NA	NA	NA	NA	NA	NA	NA	NA
U_CRI315	melanoma	0	NA	NA	NA	NA	NA	NA	NA	NA	NA	NA	NA	NA	NA	NA	NA	NA	NA	NA	NA	NA	NA	NA	NA	NA	NA	NA	NA	NA	NA	NA	NA	NA	NA	NA	NA	NA	NA	NA	NA	NA	NA	NA	NA	NA	NA	NA	NA
Gide_ipiPD1_Patient1_PRE	melanoma	0	1	4349	149	149	149	472	9474	62	148	1414	1414	91	91	91	280	130	6	6	6	18397	939	3968	1225	3813	9	9	9	1659	1659	719	247	247	53	1736	1736	4	4	4	NA	15629	15629	1	477	6	19	19	24
Gide_ipiPD1_Patient10_PRE	melanoma	0	0	3457	82	82	82	1020	89	148	2499	1148	1148	73	73	73	51	342	2	2	2	14819	1433	3022	1195	8420	55	55	55	5755	5755	201	42	42	78	23885	23885	2	2	2	NA	4884	4884	2	881	2	127	127	1369
Gide_ipiPD1_Patient12_PRE	melanoma	0	NA	3034	81	81	81	777	25	146	97	1102	1102	180	180	180	40	103	35	35	35	9872	37	6622	749	2881	16	16	16	6115	6115	12	24	24	5	15895	15895	5	5	5	NA	4730	4730	1	493	6	1	1	4
Gide_ipiPD1_Patient13_PRE	melanoma	1	0	2957	262	262	262	606	236	266	143	1461	1461	184	184	184	121	31	1	1	1	3826	120	21474	938	2108	32	32	32	4161	4161	247	147	147	21	928	928	1	1	1	NA	14505	14505	5	352	17	12	12	46
Gide_ipiPD1_Patient14_PRE	melanoma	1	1	2746	136	136	136	791	11206	324	101	1028	1028	122	122	122	126	99	1	1	1	13258	302	4945	1652	2045	93	93	93	2500	2500	938	30	30	8	1079	1079	6	6	6	NA	16503	16503	1	527	1	13	13	63
Gide_ipiPD1_Patient15_PRE	melanoma	1	1	1884	236	236	236	367	13	212	150	812	812	197	197	197	232	74	13	13	13	7900	167	5670	1381	3940	211	211	211	1117	1117	38	16	16	8	750	750	1	1	1	NA	16684	16684	5	762	13	6	6	13
Gide_ipiPD1_Patient17_PRE	melanoma	1	NA	1117	156	156	156	1011	45	122	2032	1444	1444	525	525	525	124	321	1	1	1	19770	1056	4239	568	3374	17	17	17	3240	3240	32	23	23	6	7580	7580	1	1	1	NA	12693	12693	1	726	4	37	37	676
Gide_ipiPD1_Patient19_PRE	melanoma	1	1	2553	186	186	186	1011	2252	169	162	1204	1204	84	84	84	71	64	7	7	7	8789	76	3677	1515	4175	1	1	1	3069	3069	105	37	37	5	2210	2210	5	5	5	NA	11358	11358	1	718	1	45	45	32
Gide_ipiPD1_Patient2_PRE	melanoma	0	1	1795	179	179	179	586	340	60	3561	1496	1496	163	163	163	110	128	11	11	11	16684	3063	5903	1226	6695	200	200	200	1973	1973	23	20	20	2	3510	3510	2	2	2	NA	8260	8260	2	370	2	121	121	23
Gide_ipiPD1_Patient20_PRE	melanoma	1	1	3858	85	85	85	540	9	77	135	1236	1236	149	149	149	55	144	4	4	4	5400	64	2455	1531	4498	4	4	4	14863	14863	16	13	13	1	1367	1367	9	9	9	NA	5056	5056	1	606	1	1	1	32
Gide_ipiPD1_Patient21_PRE	melanoma	1	1	2297	113	113	113	691	17	190	86	1282	1282	296	296	296	85	53	7	7	7	16503	127	5836	1247	5077	12	12	12	6433	6433	39	19	19	10	4765	4765	4	4	4	NA	13109	13109	1	373	1	15	15	19
Gide_ipiPD1_Patient23_PRE	melanoma	1	1	2217	258	258	258	360	217	203	66	1763	1763	291	291	291	230	274	5	5	5	5186	1175	7140	1302	5675	1	1	1	1131	1131	10	65	65	51	4633	4633	7	7	7	NA	12659	12659	32	459	1	205	205	5
Gide_ipiPD1_Patient24_PRE	melanoma	1	1	2186	92	92	92	1026	54	238	99	1295	1295	212	212	212	33	110	6	6	6	16225	209	22336	1202	2459	12	12	12	2996	2996	332	48	48	1	4880	4880	1	1	1	NA	13753	13753	5	565	1	24	24	26
Gide_ipiPD1_Patient25_PRE	melanoma	1	1	1183	100	100	100	584	24	84	2554	1527	1527	244	244	244	71	94	6	6	6	32104	475	2655	1327	2468	501	501	501	2537	2537	79	21	21	12	1659	1659	1	1	1	NA	10670	10670	1	688	1	98	98	97
Gide_ipiPD1_Patient26_PRE	melanoma	1	1	1298	69	69	69	1641	756	113	79	2446	2446	199	199	199	180	38	5	5	5	8804	1607	7237	1119	7392	15	15	15	2680	2680	27	101	101	9	4028	4028	1	1	1	NA	15091	15091	1	385	1	5	5	65
Gide_ipiPD1_Patient27_PRE	melanoma	1	1	2156	142	142	142	589	265	247	118	1169	1169	140	140	140	115	30	8	8	8	14956	438	8914	866	3709	10	10	10	3489	3489	50	139	139	7	4454	4454	1	1	1	NA	15424	15424	1	366	1	6	6	8
Gide_ipiPD1_Patient32_PRE	melanoma	1	1	2259	267	267	267	643	272	163	124	767	767	158	158	158	141	414	5	5	5	3317	201	3693	868	7072	12	12	12	5172	5172	36	33	33	7	852	852	14	14	14	NA	5584	5584	1	676	1	91	91	13
Gide_ipiPD1_Patient33_PRE	melanoma	1	1	1634	176	176	176	1090	67	115	104	1320	1320	86	86	86	132	26	1	1	1	10964	314	11012	1178	3953	33	33	33	1806	1806	291	17	17	14	2255	2255	1	1	1	NA	20873	20873	92	568	11	39	39	1
Gide_ipiPD1_Patient34_PRE	melanoma	1	1	1840	152	152	152	1015	97	140	87	1213	1213	173	173	173	85	106	20	20	20	7503	106	23145	751	5584	17	17	17	1928	1928	14	13	13	11	8522	8522	1	1	1	NA	13794	13794	10	391	1	18	18	13
Gide_ipiPD1_Patient35_PRE	melanoma	1	1	1338	94	94	94	471	57	338	159	1155	1155	46	46	46	105	90	6	6	6	5733	194	2540	1063	3801	10	10	10	2581	2581	19	16	16	1	2842	2842	1	1	1	NA	8722	8722	1	447	6	22	22	27
Gide_ipiPD1_Patient36_PRE	melanoma	1	1	2415	166	166	166	552	198	189	80	929	929	299	299	299	76	44	8	8	8	13258	460	10264	797	1569	72	72	72	2570	2570	18	20	20	8	6572	6572	1	1	1	NA	12274	12274	1	777	22	35	35	31
Gide_ipiPD1_Patient37_PRE	melanoma	1	1	2772	279	279	279	236	44	250	53	809	809	130	130	130	83	29	6	6	6	7203	118	15424	998	3249	553	553	553	4937	4937	48	17	17	11	843	843	6	6	6	NA	13996	13996	1	377	1	1	1	40
Gide_ipiPD1_Patient44_PRE	melanoma	1	1	3615	257	257	257	1027	19	409	162	1166	1166	179	179	179	57	92	20	20	20	42295	862	9047	765	2466	70	70	70	5217	5217	97	12	12	29	4152	4152	2	2	2	NA	6622	6622	2	642	2	36	36	28
Gide_ipiPD1_Patient45_PRE	melanoma	1	1	1569	71	71	71	694	1142	153	133	2010	2010	163	163	163	102	137	6	6	6	36713	1417	5770	846	7106	48	48	48	3083	3083	95	55	55	11	1852	1852	1	1	1	NA	15424	15424	1	389	9	9	9	105
Gide_ipiPD1_Patient46_PRE	melanoma	1	1	2210	132	132	132	539	84	91	82	1196	1196	111	111	111	69	52	9	9	9	11110	178	6565	1376	3725	21	21	21	4306	4306	44	28	28	5	2561	2561	1	1	1	NA	10082	10082	1	393	1	10	10	26
Gide_ipiPD1_Patient47_PRE	melanoma	1	1	1745	189	189	189	546	97	328	140	1116	1116	211	211	211	51	65	2	2	2	5086	180	12244	1183	2312	39	39	39	3702	3702	13	20	20	2	1933	1933	2	2	2	NA	12897	12897	2	464	2	22	22	224
Gide_ipiPD1_Patient49_PRE	melanoma	1	1	2044	219	219	219	1295	326	195	240	726	726	116	116	116	87	164	2	2	2	10453	455	5049	642	3403	19	19	19	2337	2337	61	34	34	11	1754	1754	2	2	2	NA	13146	13146	2	775	25	2	2	11
Gide_ipiPD1_Patient50_PRE	melanoma	1	1	1134	142	142	142	625	8	162	159	1263	1263	172	172	172	93	38	66	66	66	24979	265	5670	831	2973	919	919	919	2364	2364	66	14	14	10	2101	2101	1	1	1	NA	13073	13073	1	617	1	8	8	12
Gide_ipiPD1_Patient6_PRE	melanoma	0	0	2422	166	166	166	1259	6934	118	133	1498	1498	112	112	112	130	74	7	7	7	9720	121	10917	673	4623	8	8	8	2041	2041	104	397	397	7	1297	1297	1	1	1	NA	11279	11279	1	579	6	47	47	17
Gide_ipiPD1_Patient7_PRE	melanoma	1	NA	1428	347	347	347	928	257	292	135	1258	1258	304	304	304	307	236	2	2	2	3971	96	7194	422	4772	152	152	152	3304	3304	46	20	20	38	3728	3728	2	2	2	NA	16115	16115	11	393	2	24	24	2
Gide_ipiPD1_Patient8_PRE	melanoma	0	1	2349	71	71	71	758	2724	70	151	880	880	71	71	71	188	73	10	10	10	1649	62	4298	1118	3848	2	2	2	945	945	273	139	139	11	1518	1518	2	2	2	NA	11545	11545	2	465	33	2	2	2
Gide_PD1_Patient10_PRE	melanoma	0	1	1338	48	48	48	663	11	293	187	1217	1217	81	81	81	129	48	8	8	8	13335	316	7004	1304	3457	9	9	9	2777	2777	329	206	206	7	1544	1544	5	5	5	NA	19173	19173	1	495	9	1	1	18
Gide_PD1_Patient11_PRE	melanoma	0	0	3781	71	71	71	913	17	99	140	859	859	82	82	82	35	15	54	54	54	26796	381	4057	1082	1430	10	10	10	3557	3557	14	40	40	70	2578	2578	1	1	1	NA	10285	10285	6	386	9	17	17	105
Gide_PD1_Patient12_PRE	melanoma	1	0	4025	64	64	64	977	198	24	1393	697	697	85	85	85	32	93	11	11	11	29622	1322	5549	1521	1614	4	4	4	1883	1883	107	14	14	53	1102	1102	1	1	1	NA	9702	9702	1	599	4	35	35	1071
Gide_PD1_Patient13_PRE	melanoma	0	0	2478	118	118	118	990	1020	409	175	881	881	120	120	120	110	56	15	15	15	9928	243	11545	937	1856	21	21	21	1933	1933	9	113	113	26	4023	4023	1	1	1	NA	15682	15682	1	527	5	47	47	116
Gide_PD1_Patient14_PRE	melanoma	0	1	2304	54	54	54	860	37	276	5655	897	897	135	135	135	39	50	28	28	28	13184	207	3539	1883	2387	7	7	7	2062	2062	9	26	26	16	9948	9948	1	1	1	NA	6516	6516	1	551	6	33	33	297
Gide_PD1_Patient15_PRE	melanoma	0	0	1946	44	44	44	1346	210	153	139	577	577	131	131	131	33	58	15	15	15	11383	56	3146	1325	1255	10	10	10	2820	2820	18	35	35	35	1567	1567	1	1	1	NA	6681	6681	1	845	8	8	8	51
Gide_PD1_Patient16_PRE	melanoma	0	0	1795	139	139	139	1526	31	230	1525	726	726	264	264	264	48	136	15	15	15	27009	548	11332	1263	3779	54	54	54	2912	2912	101	35	35	11	7815	7815	2	2	2	NA	6666	6666	2	844	2	64	64	465
Gide_PD1_Patient17_PRE	melanoma	0	0	2556	164	164	164	801	35	294	432	2154	2154	184	184	184	56	36	5	5	5	41772	954	22450	951	1984	11	11	11	2991	2991	82	19	19	16	3254	3254	1	1	1	NA	17105	17105	1	451	4	27	27	17
Gide_PD1_Patient18_PRE	melanoma	0	0	2928	479	479	479	765	48	106	106	1130	1130	137	137	137	104	62	36	36	36	20131	213	8722	776	3169	749	749	749	2210	2210	95	32	32	1	3093	3093	1	1	1	NA	10285	10285	13	814	1	12	12	42
Gide_PD1_Patient19_PRE	melanoma	1	1	534	141	141	141	624	59	401	103	671	671	124	124	124	214	73	20	20	20	11306	195	8654	1271	4469	153	153	153	2519	2519	18	1	1	43	1831	1831	1	1	1	NA	15278	15278	1	377	1	41	41	75
Gide_PD1_Patient2_PRE	melanoma	0	0	3326	112	112	112	719	120	332	154	1217	1217	177	177	177	36	40	5	5	5	35342	1550	20131	1069	1939	10	10	10	6495	6495	133	34	34	12	6716	6716	1	1	1	NA	11306	11306	1	508	5	11	11	53
Gide_PD1_Patient21_PRE	melanoma	1	1	2180	138	138	138	753	15	466	140	805	805	351	351	351	41	127	9	9	9	8080	118	17166	883	2674	1423	1423	1423	3372	3372	21	29	29	1	1042	1042	1	1	1	NA	7474	7474	1	788	1	1	1	32
Gide_PD1_Patient23_PRE	melanoma	1	0	1181	76	76	76	925	18	264	205	684	684	340	340	340	61	64	7	7	7	27229	728	35342	658	1833	224	224	224	3386	3386	84	26	26	8	2453	2453	1	1	1	NA	8408	8408	1	546	1	1	1	8
Gide_PD1_Patient25_PRE	melanoma	1	1	2700	102	102	102	657	30	253	209	827	827	268	268	268	64	33	9	9	9	17361	513	9002	1023	1882	17	17	17	2514	2514	48	20	20	17	1410	1410	5	5	5	NA	16225	16225	1	478	14	10	10	115
Gide_PD1_Patient27_PRE	melanoma	1	1	4838	79	79	79	1561	19770	128	194	1229	1229	27	27	27	38	44	8	8	8	9184	676	2124	1661	2396	8	8	8	1207	1207	11	305	305	39	693	693	1	1	1	NA	33843	33843	24	622	1	28	28	199
Gide_PD1_Patient29_PRE	melanoma	1	1	2933	94	94	94	1997	481	204	139	1006	1006	185	185	185	87	127	19	19	19	7063	97	2210	1804	2151	27	27	27	1607	1607	29	119	119	13	1368	1368	2	2	2	NA	9326	9326	2	657	2	132	132	8
Gide_PD1_Patient3_PRE	melanoma	0	0	2114	104	104	104	1134	366	356	97	625	625	83	83	83	40	45	31	31	31	15895	355	3118	805	1751	43	43	43	2247	2247	16	45	45	33	1830	1830	1	1	1	NA	10893	10893	1	464	11	17	17	62
Gide_PD1_Patient30_PRE	melanoma	1	1	660	174	174	174	803	53	85	96	694	694	237	237	237	194	161	66	66	66	16684	330	6234	752	10823	141	141	141	4751	4751	57	25	25	9	3840	3840	1	1	1	NA	9968	9968	1	383	4	14	14	8
Gide_PD1_Patient34_PRE	melanoma	1	1	1606	273	273	273	1042	2977	216	158	1037	1037	103	103	103	56	37	1	1	1	8345	549	9872	892	2336	40	40	40	3397	3397	87	38	38	8	3066	3066	1	1	1	NA	15682	15682	1	493	1	30	30	32
Gide_PD1_Patient35_PRE	melanoma	1	1	3870	93	93	93	650	19	171	75	730	730	61	61	61	28	26	14	14	14	9507	268	6359	1156	2323	36	36	36	5620	5620	14	31	31	45	5230	5230	1	1	1	NA	5926	5926	1	559	11	12	12	13
Gide_PD1_Patient36_PRE	melanoma	1	1	1872	86	86	86	475	44	86	133	1281	1281	108	108	108	99	51	2	2	2	3940	186	29854	1104	2525	112	112	112	2232	2232	74	20	20	8	6214	6214	18	18	18	NA	6804	6804	2	515	2	2	2	2
Gide_PD1_Patient38_PRE	melanoma	1	1	2932	291	291	291	614	23	274	101	920	920	181	181	181	73	37	15	15	15	22110	326	9757	784	3133	48	48	48	4583	4583	48	12	12	13	1491	1491	1	1	1	NA	10845	10845	8	505	1	15	15	41
Gide_PD1_Patient4_PRE	melanoma	0	0	2287	158	158	158	443	12	198	60	1198	1198	139	139	139	127	48	9	9	9	19950	1287	12829	751	4861	25	25	25	5590	5590	48	28	28	9	2287	2287	4	4	4	NA	24278	24278	9	274	10	10	10	39
Gide_PD1_Patient40_PRE	melanoma	1	1	2954	99	99	99	646	50	289	134	932	932	103	103	103	49	174	40	40	40	9375	205	10025	863	2388	562	562	562	8420	8420	13	20	20	13	5666	5666	2	2	2	NA	5217	5217	2	913	2	2	2	14
Gide_PD1_Patient41_PRE	melanoma	1	1	1184	178	178	178	827	1988	540	114	1433	1433	223	223	223	114	31	8	8	8	14036	310	8682	1430	2777	6	6	6	2762	2762	64	36	36	52	4092	4092	1	1	1	NA	24016	24016	1	854	1	10	10	31
Gide_PD1_Patient42_PRE	melanoma	1	1	2772	94	94	94	1041	24	154	295	681	681	198	198	198	56	27	6	6	6	19009	345	4097	1073	1464	24	24	24	5116	5116	94	41	41	15	8080	8080	1	1	1	NA	15181	15181	1	587	1	10	10	37
Gide_PD1_Patient44_PRE	melanoma	1	1	3097	192	192	192	694	13	123	122	1071	1071	142	142	142	42	57	8	8	8	6516	156	11941	981	2079	10	10	10	7570	7570	25	8	8	2	6266	6266	2	2	2	NA	16803	16803	2	434	2	9	9	26
Gide_PD1_Patient45_PRE	melanoma	1	1	2621	206	206	206	2058	58	272	87	866	866	173	173	173	57	61	2	2	2	10823	525	11232	1277	1712	8	8	8	7793	7793	47	8	8	7	3500	3500	2	2	2	NA	8587	8587	2	610	2	7	7	9
Gide_PD1_Patient46_PRE	melanoma	1	1	2694	173	173	173	734	153	223	100	796	796	196	196	196	71	70	6	6	6	7532	334	10102	749	2094	35	35	35	2762	2762	29	14	14	6	2163	2163	5	5	5	NA	14775	14775	1	373	7	1	1	52
Gide_PD1_Patient47_PRE	melanoma	1	1	2754	145	145	145	673	170	320	156	2049	2049	85	85	85	34	53	9	9	9	20222	510	16447	1234	2813	15	15	15	7012	7012	64	68	68	12	1136	1136	5	5	5	NA	9215	9215	1	480	5	24	24	73
Gide_PD1_Patient48_PRE	melanoma	1	1	3948	304	304	304	854	39	196	48	1107	1107	152	152	152	108	24	6	6	6	10264	126	7660	1211	2320	236	236	236	3848	3848	29	18	18	12	3617	3617	2	2	2	NA	19770	19770	2	374	2	15	15	35
Gide_PD1_Patient49_PRE	melanoma	1	1	2319	119	119	119	950	212	304	61	1005	1005	146	146	146	96	51	1	1	1	16391	447	11182	1306	2235	14	14	14	3097	3097	32	66	66	1	3823	3823	1	1	1	NA	14819	14819	1	436	6	20	20	23
Gide_PD1_Patient5_PRE	melanoma	0	0	1856	138	138	138	811	2419	313	214	924	924	120	120	120	41	54	1	1	1	4989	336	4475	776	1664	121	121	121	3321	3321	69	10	10	9	3899	3899	1	1	1	NA	12120	12120	32	549	1	36	36	24
Gide_PD1_Patient50_PRE	melanoma	1	1	2519	161	161	161	547	84	110	131	655	655	66	66	66	112	171	101	101	101	30827	313	6286	1018	6176	693	693	693	2295	2295	39	13	13	10	4540	4540	1	1	1	NA	9061	9061	18	797	1	10	10	17
Gide_PD1_Patient52_PRE	melanoma	1	1	2273	278	278	278	887	1575	366	88	1179	1179	85	85	85	62	49	5	5	5	5848	124	8817	1439	2775	8	8	8	3228	3228	268	137	137	7	1181	1181	1	1	1	NA	19009	19009	1	619	1	18	18	136
Gide_PD1_Patient53_PRE	melanoma	1	1	5217	311	311	311	1577	74	61	214	490	490	137	137	137	66	15	2	2	2	31847	688	2401	866	906	108	108	108	5535	5535	93	12	12	24	29854	29854	7	7	7	NA	3810	3810	2	861	2	75	75	165
Gide_PD1_Patient54_PRE	melanoma	1	1	1719	158	158	158	743	332	81	114	1231	1231	81	81	81	156	46	1	1	1	6399	147	5966	1023	4809	105	105	105	2766	2766	226	140	140	12	10222	10222	1	1	1	NA	18691	18691	4	534	1	29	29	19
Gide_PD1_Patient6_PRE	melanoma	0	0	2649	62	62	62	682	21	90	108	966	966	42	42	42	65	87	2	2	2	2218	31	3658	1473	3821	167	167	167	7419	7419	142	149	149	15	3151	3151	2	2	2	NA	9796	9796	13	750	2	2	2	2
Gide_PD1_Patient7_PRE	melanoma	0	0	2023	333	333	333	580	13	197	75	1048	1048	308	308	308	70	37	62	62	62	5931	178	13372	1126	4289	1378	1378	1378	4884	4884	91	11	11	16	1515	1515	2	2	2	NA	12498	12498	2	624	2	33	33	23
Gide_PD1_Patient8_PRE	melanoma	0	0	412	102	102	102	1297	6996	107	142	1690	1690	140	140	140	142	305	12	12	12	3457	2286	1468	885	8272	15	15	15	2158	2158	766	112	112	7	1166	1166	8	8	8	NA	9424	9424	1	542	4	5	5	110
Gide_PD1_Patient9_PRE	melanoma	0	0	3230	36	36	36	729	135	144	775	603	603	199	199	199	57	66	8	8	8	20131	521	7176	1144	1499	31	31	31	6956	6956	152	26	26	2	4472	4472	2	2	2	NA	7012	7012	2	1043	2	11	11	37
Supplementary Table S2.mRNA expression of IFN resistance genes of immune checkpoint inhibitor treated melanomas.
[truncated: 80 more columns]
